# Supplementary material for: Pd(ii)-Catalyzed enantioselective C–H olefination toward the synthesis of P-stereogenic phosphinamides
Source: Royal Society of Chemistry journal article supplement (doi:10.1039/d3cc05052a), 2024-01-01
Supplement: d3cc05052a1.pdf [file d3cc05052a1.pdf]

# Supporting Information

## Pd(II)-Catalyzed Enantioselective C–H Olefination toward the Synthesis of *P*-stereogenic Phosphines

Zi-Jia Chen,<sup>‡a</sup> Ling-Jie Fan,<sup>‡b</sup> Pei-Pei Xie,<sup>a</sup> Pu-Fan Qian,<sup>a</sup> Xinquan Hu,<sup>b</sup> Tao Zhou,<sup>\*a,c</sup> and Bing-Feng Shi<sup>\*a,c,d</sup>

<sup>a</sup>Center of Chemistry for Frontier Technologies, Department of Chemistry, Zhejiang University, Hangzhou 310027, China

<sup>b</sup>College of Chemical Engineering, Zhejiang University of Technology, Hangzhou 310032, China

<sup>c</sup>College of Material Chemistry and Chemical Engineering, Key Laboratory of Organosilicon Chemistry and Material Technology, Ministry of Education, Hangzhou Normal University, Hangzhou, 311121, Zhejiang, China

<sup>d</sup>College of Biological, Chemical Sciences and Engineering, Jiaying University, Jiaying, Zhejiang 314001, China

E-mail: taozhou.zju.edu.cn; bfshi@zju.edu.cn

## Content

|                                                                                                                           |    |
|---------------------------------------------------------------------------------------------------------------------------|----|
| <b>1. General Information</b> .....                                                                                       | 3  |
| <b>2. Experiment Detail and Characterization Data</b> .....                                                               | 4  |
| <b>2.1 Optimization of Olefination</b> .....                                                                              | 4  |
| <b>2.2 General Procedure for Pd(II)-Catalyzed C–H Enantioselective Olefination and Characterization of Products</b> ..... | 5  |
| <b>2.3 General Procedure for Pd(II)-Catalyzed C–H Olefination via Kinetic Resolution (KR)</b> .....                       | 29 |
| <b>2.4 Gram-Scale</b> .....                                                                                               | 33 |
| <b>3. Mechanistic Studies</b> .....                                                                                       | 34 |
| <b>3.1 H/D exchange studies</b> .....                                                                                     | 34 |
| <b>3.2 Kinetic isotopic effect experiment</b> .....                                                                       | 35 |
| <b>4. Computational Details</b> .....                                                                                     | 37 |
| <b>4.1 DFT-calculated stereoselectivity for desymmetrization</b> .....                                                    | 37 |
| <b>4.2 DFT-calculated stereoselectivity for kinetic resolution</b> .....                                                  | 39 |
| <b>4.3 Table of energies</b> .....                                                                                        | 39 |

|                                                   |     |
|---------------------------------------------------|-----|
| 4.4 Cartesian coordinates of the structures ..... | 40  |
| 5. Derivatizations .....                          | 52  |
| 6. X-Ray Crystallographic Data .....              | 57  |
| 7. References.....                                | 59  |
| 8. NMR Spectra.....                               | 60  |
| 9. HPLC Charts .....                              | 136 |

## 1. General Information

All the materials and solvent were purchased from commercial suppliers and used without additional purification. Pd(OAc)<sub>2</sub> was purchased from Laajoo (China). NMR spectra were recorded on a Bruke Avance operating for <sup>1</sup>H NMR at 400 MHz, <sup>13</sup>C NMR at 101 MHz, <sup>19</sup>F NMR at 376 MHz using TMS as internal standard. The peaks were internally referenced to residual undeuterated chloroform in CDCl<sub>3</sub> ( $\delta$  H = 7.26 ppm,  $\delta$  C = 77.16 ppm). The following abbreviations (or combinations thereof) were used to explain multiplicities: s = singlet, d = doublet, t = triplet, q = quartet, m = multiplet. Mass spectroscopy data of the products were collected on an HRMS-TOF instrument. The *ee* value was determined on Shimadzu HPLC using CHIRALPAK column with hexane and 2-propanol as eluent, Wavelength = 254 nm.

## 2. Experiment Detail and Characterization Data

### 2.1 Optimization of Alkynylation

Table S1: Optimization of reaction conditions<sup>a</sup>

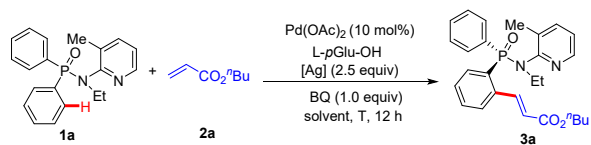

| entry           | Solvent          | [Ag]                     | T (°C) | Yield of <b>3a</b> (%) <sup>b</sup> | Ee of <b>3a</b> (%) <sup>c</sup> | Conversion(%) |
|-----------------|------------------|--------------------------|--------|-------------------------------------|----------------------------------|---------------|
| 1               | <i>t</i> -BuOH   | $\text{Ag}_2\text{CO}_3$ | 60     | 50                                  | 93                               | 55            |
| 2               | PhCl             | $\text{Ag}_2\text{CO}_3$ | 60     | 16                                  | 81                               | 24            |
| 3               | dioxane          | $\text{Ag}_2\text{CO}_3$ | 60     | 60                                  | 89                               | 66            |
| 4               | <i>t</i> -AmylOH | $\text{Ag}_2\text{CO}_3$ | 60     | 65                                  | 95                               | 69            |
| 5               | <i>t</i> -AmylOH | $\text{Ag}_2\text{SO}_4$ | 60     | 25                                  | 92                               | 30            |
| 6               | <i>t</i> -AmylOH | AgOAc                    | 60     | 38                                  | 92                               | 48            |
| 7               | <i>t</i> -AmylOH | $\text{Ag}_3\text{PO}_4$ | 60     | 44                                  | 95                               | 50            |
| 8               | <i>t</i> -AmylOH | $\text{Ag}_2\text{CO}_3$ | 50     | 39                                  | 94                               | 42            |
| 9               | <i>t</i> -AmylOH | $\text{Ag}_2\text{CO}_3$ | 70     | 50                                  | 94                               | 53            |
| 10 <sup>d</sup> | <i>t</i> -AmylOH | $\text{Ag}_2\text{CO}_3$ | 70     | nr                                  | --                               | --            |

<sup>a</sup>Reaction conditions: **1a** (0.1 mmol), **2a** (0.2 mmol),  $\text{Pd}(\text{OAc})_2$  (0.01 mmol), [Ag] (0.05 mmol), L-pGlu-OH (0.02 mmol), BQ (0.1 mmol), solvent (1.0 mL), air for 12 h.

<sup>b</sup>Isolated yield. <sup>c</sup>The ee was determined by chiral HPLC. <sup>d</sup> $\text{Ar}^F$  directing group was used.

## 2.2 General Procedure for Pd(II)-Catalyzed C–H Enantioselective Olefination and Characterization of Products

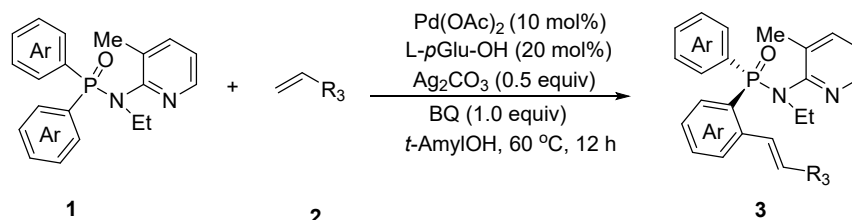

To a 50 mL Schlenk tube was added substrate **1** (0.10 mmol), **2** (0.20 mmol), Pd(OAc)<sub>2</sub> (2.2 mg, 0.01 mmol), L-*p*Glu-OH (2.6 mg, 0.02 mmol), Ag<sub>2</sub>CO<sub>3</sub> (13.8 mg, 0.05 mmol), BQ (10.8 mg, 0.10 mmol), *t*-AmylOH (1 mL). The mixture was stirred for 12 h at 60 °C under air. The resulting mixture was filtered through a celite pad and concentrated in vacuo. The residue was purified by preparative TLC using PE/EA as the eluent to afford the olefination product **3**.

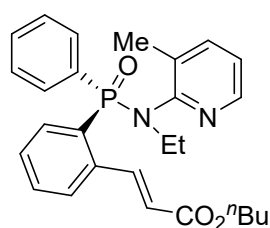

### butyl (*R, E*)-3-(2-((ethyl(3-methylpyridin-2-yl)amino)(phenyl)phosphoryl)phenyl)acrylate **3a**

A purification by flash chromatography in petroleum ether : ethyl acetate = 2 : 1 gave **3a** as a yellow solid (30.7 mg, 66%). The *ee* value was determined by HPLC analysis on a Chiralcel IA column (hexane/isopropanol = 85/15, flow = 0.8 mL/min) with *t*<sub>r</sub> = 21.3 min (minor), 24.7 min (major): 95% *ee*.

The absolute stereochemistry was assigned by X-ray diffraction analysis.

<sup>1</sup>H NMR (400 MHz, CDCl<sub>3</sub>) δ 8.52 (d, *J* = 15.8 Hz, 1H), 8.47 – 8.37 (m, 1H), 8.27 (dd, *J* = 4.8, 1.9 Hz, 1H), 7.75 – 7.63 (m, 2H), 7.58 – 7.41 (m, 3H), 7.35 (td, *J* = 7.4, 1.5 Hz, 1H), 7.31 – 7.20 (m, 3H), 6.94 (dd, *J* = 7.5, 4.7 Hz, 1H), 6.10 (d, *J* = 15.8 Hz, 1H), 4.20 – 4.07 (m, 2H), 3.79 – 3.68 (m, 2H), 2.20 (s, 3H), 1.71 – 1.61 (m, 2H), 1.47 – 1.36 (m, 2H), 1.04 (t, *J* = 7.1 Hz, 3H), 0.95 (t, *J* = 7.4 Hz, 3H).

**<sup>13</sup>C NMR (101 MHz, CDCl<sub>3</sub>)** δ 166.6, 154.0 (d, *J*<sub>c-p</sub> = 3.9 Hz), 146.6, 143.6 (d, *J*<sub>c-p</sub> = 4.3 Hz), 139.5, 139.2 (d, *J*<sub>c-p</sub> = 10.9 Hz), 134.1 (d, *J*<sub>c-p</sub> = 10.1 Hz), 133.1 (d, *J*<sub>c-p</sub> = 2.9 Hz), 132.6 (d, *J*<sub>c-p</sub> = 10.9 Hz), 132.5 (d, *J*<sub>c-p</sub> = 121.5 Hz), 131.93 (d, *J*<sub>c-p</sub> = 125.3 Hz), 131.89 (d, *J*<sub>c-p</sub> = 3.1 Hz), 131.7 (d, *J*<sub>c-p</sub> = 2.9 Hz), 129.1 (d, *J*<sub>c-p</sub> = 12.8 Hz), 127.7 (d, *J*<sub>c-p</sub> = 11.0 Hz), 127.9 (d, *J*<sub>c-p</sub> = 12.8 Hz), 121.8, 120.7, 64.4, 44.5 (d, *J*<sub>c-p</sub> = 3.8 Hz), 30.8, 19.3, 18.6, 14.7 (d, *J*<sub>c-p</sub> = 2.8 Hz), 13.9.

**<sup>31</sup>P NMR (162 MHz, CDCl<sub>3</sub>)** δ 27.83.

**HRMS (ESI) m/z:** [M+Na]<sup>+</sup> Calcd. for C<sub>27</sub>H<sub>31</sub>N<sub>2</sub>NaO<sub>3</sub>P: 485.1963; found: 485.1970.

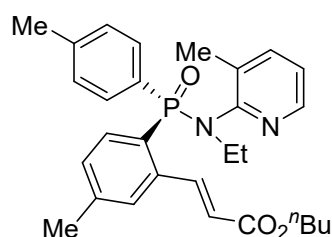

**butyl (*R*, *E*)-3-(2-((ethyl(3-methylpyridin-2-yl)amino)(*p*-tolyl)phosphoryl)-5-methylphenyl)acrylate **3b****

A purification by flash chromatography in petroleum ether : ethyl acetate = 3 : 1 gave **3b** as a yellow foam (38.2 mg, 78%). The *ee* value was determined by HPLC analysis on a Chiralcel IA column (hexane/isopropanol = 70/30, flow = 1.0 mL/min) with *t*<sub>r</sub> = 7.4 min (minor), 12.7 min (major): 95% *ee*.

The absolute stereochemistry was assigned by analogy to compound **3a**.

**<sup>1</sup>H NMR (400 MHz, CDCl<sub>3</sub>)** δ 8.50 (d, *J* = 15.8 Hz, 1H), 8.30 – 8.22 (m, 2H), 7.59 – 7.51 (m, 2H), 7.34 (d, *J* = 4.4 Hz, 1H), 7.32 – 7.21 (m, 2H), 7.04 (dd, *J* = 8.1, 3.0 Hz, 2H), 6.94 (dd, *J* = 7.6, 4.7 Hz, 1H), 6.09 (d, *J* = 15.8 Hz, 1H), 4.22 – 4.07 (m, 2H), 3.75 – 3.63 (m, 2H), 2.35 (s, 3H), 2.27 (s, 3H), 2.20 (s, 3H), 1.72 – 1.59 (m, 2H), 1.47 – 1.33 (m, 2H), 1.01 (t, *J* = 7.1 Hz, 3H), 0.95 (t, *J* = 7.4 Hz, 3H).

**<sup>13</sup>C NMR (101 MHz, CDCl<sub>3</sub>)** δ 166.7, 154.2 (d, *J*<sub>c-p</sub> = 3.6 Hz), 146.6, 143.8 (d, *J*<sub>c-p</sub> = 4.5 Hz), 142.1 (d, *J*<sub>c-p</sub> = 2.8 Hz), 141.9 (d, *J*<sub>c-p</sub> = 2.9 Hz), 139.5, 139.1 (d, *J*<sub>c-p</sub> = 10.1 Hz), 134.2 (d, *J*<sub>c-p</sub> = 10.7 Hz), 133.2 (d, *J*<sub>c-p</sub> = 2.8 Hz), 132.6 (d, *J*<sub>c-p</sub> = 10.4 Hz), 129.9 (d, *J*<sub>c-p</sub> = 13.2 Hz), 129.6 (d, *J*<sub>c-p</sub> = 124.2 Hz), 129.0 (d, *J*<sub>c-p</sub> = 128.3 Hz), 128.7 (d, *J*<sub>c-p</sub> = 13.5 Hz), 128.4 (d, *J*<sub>c-p</sub> = 11.3 Hz), 121.7, 120.3, 64.4, 44.5 (d, *J*<sub>c-p</sub> = 3.9 Hz), 30.9, 21.6, 21.5, 19.3, 18.7, 14.7 (d, *J*<sub>c-p</sub> = 2.9 Hz), 13.9.

**<sup>31</sup>P NMR (162 MHz, CDCl<sub>3</sub>)** δ 28.18.

**HRMS (ESI) m/z:** [M+Na]<sup>+</sup> Calcd. for C<sub>29</sub>H<sub>35</sub>N<sub>2</sub>NaO<sub>3</sub>P: 513.2279; found: 513.2283.

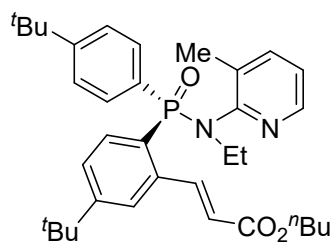

**butyl (*R, E*)-3-(5-(tert-butyl)-2-((4-(tert-butyl)phenyl)(ethyl(3-methylpyridin-2-yl) amino)phosphoryl)phenyl)acrylate **3c****

A purification by flash chromatography in petroleum ether : ethyl acetate = 3 : 1 gave **3c** as a yellow foam (30.4 mg, 53%). The *ee* value was determined by HPLC analysis on a Chiralcel IA column (hexane/isopropanol = 70/30, flow = 1.0 mL/min) with *tr* = 5.2 min (minor), 6.6 min (major): 88% *ee*.

The absolute stereochemistry was assigned by analogy to compound **3a**.

**<sup>1</sup>H NMR (400 MHz, CDCl<sub>3</sub>)** δ 8.53 (d, *J* = 15.9 Hz, 1H), 8.32 – 8.20 (m, 2H), 7.64 – 7.57 (m, 2H), 7.54 (dd, *J* = 4.5, 1.9 Hz, 1H), 7.48 (dt, *J* = 8.2, 2.1 Hz, 1H), 7.30 – 7.22 (m, 3H), 6.92 (dd, *J* = 7.5, 4.7 Hz, 1H), 6.11 (d, *J* = 15.8 Hz, 1H), 4.23 – 4.07 (m, 2H), 3.75 – 3.62 (m, 2H), 2.19 (s, 3H), 1.72 – 1.59 (m, 2H), 1.48 – 1.35 (m, 2H), 1.30 (s, 9H), 1.23 (s, 9H), 1.01 (t, *J* = 7.1 Hz, 3H), 0.95 (t, *J* = 7.4 Hz, 3H).

**<sup>13</sup>C NMR (101 MHz, CDCl<sub>3</sub>)** δ 166.8, 155.1 (d, *J*<sub>c-p</sub> = 2.9 Hz), 155.0 (d, *J*<sub>c-p</sub> = 2.8 Hz), 154.3 (d, *J*<sub>c-p</sub> = 3.7 Hz), 146.5, 144.4 (d, *J*<sub>c-p</sub> = 4.5 Hz), 139.3, 139.0 (d, *J*<sub>c-p</sub> = 9.5 Hz), 134.1 (d, *J*<sub>c-p</sub> = 10.6 Hz), 133.3 (d, *J*<sub>c-p</sub> = 3.1 Hz), 132.4 (d, *J*<sub>c-p</sub> = 10.5 Hz), 129.5 (d, *J*<sub>c-p</sub> = 124.4 Hz), 128.9 (d, *J*<sub>c-p</sub> = 128.9 Hz), 126.2 (d, *J*<sub>c-p</sub> = 13.2 Hz), 124.84 (d, *J*<sub>c-p</sub> = 12.9 Hz), 124.78 (d, *J*<sub>c-p</sub> = 11.1 Hz), 121.6, 120.2, 64.4, 44.4 (d, *J*<sub>c-p</sub> = 4.3 Hz), 35.0, 34.9, 31.2, 31.1, 30.9, 19.3, 18.7, 14.7 (d, *J*<sub>c-p</sub> = 3.3 Hz), 13.9.

**<sup>31</sup>P NMR (162 MHz, CDCl<sub>3</sub>)** δ 28.13.

**HRMS (ESI) m/z:** [M+Na]<sup>+</sup> Calcd. for C<sub>35</sub>H<sub>47</sub>N<sub>2</sub>NaO<sub>3</sub>P: 597.3219; found: 597.3222.

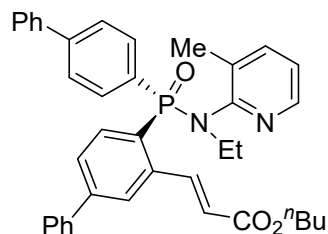

**butyl (*R, E*)-3-(4-([1,1'-biphenyl]-4-yl)(ethyl(3-methylpyridin-2-yl) amino)phosphoryl)-[1,1'-biphenyl]-3-yl)acrylate **3d****

A purification by flash chromatography in petroleum ether : ethyl acetate = 3 : 1 gave **3d** as a yellow foam (35.6 mg, 58%). The *ee* value was determined by HPLC analysis

on a Chiralcel IA column (hexane/isopropanol = 70/30, flow = 0.7 mL/min) with  $t_r$  = 12.7 min (minor), 20.5 min (major): 96% *ee*.

The absolute stereochemistry was assigned by analogy to compound **3a**.

**<sup>1</sup>H NMR (400 MHz, CDCl<sub>3</sub>)**  $\delta$  8.64 (d,  $J$  = 15.8 Hz, 1H), 8.52 (dd,  $J$  = 13.6, 8.0 Hz, 1H), 8.31 (dd,  $J$  = 4.7, 1.9 Hz, 1H), 7.89 – 7.75 (m, 3H), 7.72 (dt,  $J$  = 8.0, 2.0 Hz, 1H), 7.63 – 7.57 (m, 2H), 7.56 – 7.28 (m, 11H), 6.96 (dd,  $J$  = 7.6, 4.7 Hz, 1H), 6.22 (d,  $J$  = 15.8 Hz, 1H), 4.23 – 4.08 (m, 2H), 3.86 – 3.73 (m, 2H), 2.27 (s, 3H), 1.72 – 1.61 (m, 2H), 1.48 – 1.36 (m, 2H), 1.09 (t,  $J$  = 7.0 Hz, 3H), 0.94 (t,  $J$  = 7.4 Hz, 3H).

**<sup>13</sup>C NMR (101 MHz, CDCl<sub>3</sub>)**  $\delta$  166.6, 154.0 (d,  $J_{c-p}$  = 3.7 Hz), 146.7, 144.5 (d,  $J_{c-p}$  = 2.9 Hz), 144.2 (d,  $J_{c-p}$  = 2.9 Hz), 143.7 (d,  $J_{c-p}$  = 4.4 Hz), 140.0, 139.7 (d,  $J_{c-p}$  = 9.9 Hz), 139.6, 134.8 (d,  $J_{c-p}$  = 10.7 Hz), 133.13 (d,  $J_{c-p}$  = 10.2 Hz), 133.12 (d,  $J_{c-p}$  = 2.8 Hz), 131.0 (d,  $J_{c-p}$  = 124.3 Hz), 130.6 (d,  $J_{c-p}$  = 127.0 Hz), 129.0 (d,  $J_{c-p}$  = 12.0 Hz), 128.4, 128.2, 127.6 (d,  $J_{c-p}$  = 13.3 Hz), 127.3, 126.6 (d,  $J_{c-p}$  = 13.3 Hz), 126.4 (d,  $J_{c-p}$  = 11.3 Hz), 121.9, 120.9, 64.5, 44.5 (d,  $J_{c-p}$  = 3.9 Hz), 30.9, 19.3, 18.7, 14.8 (d,  $J_{c-p}$  = 2.7 Hz), 13.9.

**<sup>31</sup>P NMR (162 MHz, CDCl<sub>3</sub>)**  $\delta$  27.47.

**HRMS (ESI) m/z:** [M+Na]<sup>+</sup> Calcd. for C<sub>39</sub>H<sub>39</sub>N<sub>2</sub>NaO<sub>3</sub>P: 637.2590; found: 637.2596.

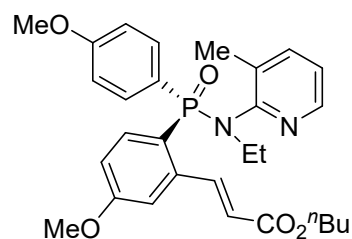

**butyl (*R*, *E*)-3-(2-((ethyl(3-methylpyridin-2-yl)amino)(4-methoxyphenyl)phosphoryl)-5-methoxyphenyl)acrylate **3e****

A purification by flash chromatography in petroleum ether : ethyl acetate = 3 : 1 gave **3e** as a yellow foam (26.6 mg, 51%). The *ee* value was determined by HPLC analysis on a Chiralcel IA column (hexane/isopropanol = 70/30, flow = 1.0 mL/min) with  $t_r$  = 9.5 min (minor), 15.6 min (major): 94% *ee*.

The absolute stereochemistry was assigned by analogy to compound **3a**.

**<sup>1</sup>H NMR (400 MHz, CDCl<sub>3</sub>)**  $\delta$  8.51 (d,  $J$  = 15.8 Hz, 1H), 8.32 (dd,  $J$  = 13.4, 8.5 Hz, 1H), 8.27 (dd,  $J$  = 4.8, 1.9 Hz, 1H), 7.63 – 7.55 (m, 2H), 7.29 (dd,  $J$  = 7.6, 1.9 Hz, 1H), 7.02 (dd,  $J$  = 3.8, 2.6 Hz, 1H), 6.98 (dt,  $J$  = 8.5, 2.2 Hz, 1H), 6.93 (dd,  $J$  = 7.5, 4.7 Hz, 1H), 6.74 (dd,  $J$  = 8.8, 2.6 Hz, 2H), 6.09 (d,  $J$  = 15.8 Hz, 1H), 4.21 – 4.08 (m, 2H), 3.82 (s, 3H), 3.75 (s, 3H), 3.74 – 3.63 (m, 2H), 2.19 (s, 3H), 1.70 – 1.61 (m, 2H), 1.47 – 1.36 (m, 2H), 1.01 (t,  $J$  = 7.1 Hz, 3H), 0.95 (t,  $J$  = 7.4 Hz, 3H).



<sup>13</sup>C NMR (101 MHz, CDCl<sub>3</sub>) δ 166.7, 162.08 (d, *J*<sub>c-p</sub> = 3.0 Hz), 162.04 (d, *J*<sub>c-p</sub> = 2.8 Hz), 154.3 (d, *J*<sub>c-p</sub> = 3.7 Hz), 146.6, 143.7 (d, *J*<sub>c-p</sub> = 4.4 Hz), 141.1 (d, *J*<sub>c-p</sub> = 10.7 Hz), 139.5, 136.1 (d, *J*<sub>c-p</sub> = 3.9 Hz), 134.4 (d, *J*<sub>c-p</sub> = 11.2 Hz), 133.3 (d, *J*<sub>c-p</sub> = 2.7 Hz), 124.6 (d, *J*<sub>c-p</sub> = 129.4 Hz), 123.7 (d, *J*<sub>c-p</sub> = 132.8 Hz), 121.71, 120.70, 114.4 (d, *J*<sub>c-p</sub> = 13.8 Hz), 113.4 (d, *J*<sub>c-p</sub> = 13.9 Hz), 113.0 (d, *J*<sub>c-p</sub> = 12.0 Hz), 64.4, 55.5, 55.3, 44.5 (d, *J*<sub>c-p</sub> = 4.1 Hz), 30.9, 19.3, 18.7, 14.8 (d, *J*<sub>c-p</sub> = 2.7 Hz), 13.9.

<sup>31</sup>P NMR (162 MHz, CDCl<sub>3</sub>) δ 27.67.

HRMS (ESI) *m/z*: [M+Na]<sup>+</sup> Calcd. for C<sub>29</sub>H<sub>35</sub>N<sub>2</sub>NaO<sub>5</sub>P: 545.2180; found: 545.2181.

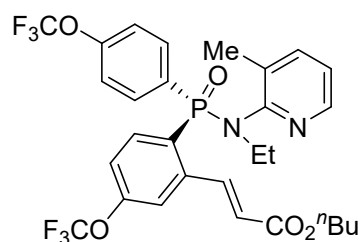

**butyl (*R, E*)-3-(2-((ethyl(3-methylpyridin-2-yl)amino)(4-(trifluoromethoxy)phenyl)phosphoryl)-5-(trifluoromethoxy)phenyl)acrylate **3f****

A purification by flash chromatography in petroleum ether : ethyl acetate = 3 : 1 gave **3f** as a yellow foam (42.8 mg, 68%). The *ee* value was determined by HPLC analysis on a Chiralcel IA column (hexane/isopropanol = 85/15, flow = 0.8 mL/min) with *tr* = 8.3 min (minor), 14.0 min (major): 95% *ee*.

The absolute stereochemistry was assigned by analogy to compound **3a**.

<sup>1</sup>H NMR (400 MHz, CDCl<sub>3</sub>) δ 8.54 – 8.44 (m, 2H), 8.25 (dd, *J* = 4.8, 1.9 Hz, 1H), 7.79 – 7.70 (m, 2H), 7.36 – 7.27 (m, 3H), 7.12 – 7.05 (m, 2H), 6.97 (dd, *J* = 7.6, 4.7 Hz, 1H), 6.10 (d, *J* = 15.8 Hz, 1H), 4.22 – 4.09 (m, 2H), 3.77 – 3.66 (m, 2H), 2.18 (s, 3H), 1.70 – 1.60 (m, 2H), 1.47 – 1.35 (m, 2H), 1.05 (t, *J* = 7.1 Hz, 3H), 0.95 (t, *J* = 7.4 Hz, 3H).

<sup>13</sup>C NMR (101 MHz, CDCl<sub>3</sub>) δ 166.0, 153.5 (d, *J*<sub>c-p</sub> = 4.0 Hz), 151.9, 146.7, 141.9 (d, *J*<sub>c-p</sub> = 4.1 Hz), 141.8 (d, *J*<sub>c-p</sub> = 10.4 Hz), 139.8, 136.5 (d, *J*<sub>c-p</sub> = 11.7 Hz), 134.7 (d, *J*<sub>c-p</sub> = 11.1 Hz), 132.8 (d, *J*<sub>c-p</sub> = 3.0 Hz), 130.5 (d, *J*<sub>c-p</sub> = 125.2 Hz), 130.2 (d, *J*<sub>c-p</sub> = 128.3 Hz), 122.4, 122.2, 120.5 (d, *J*<sub>c-p</sub> = 13.7 Hz), 120.4 (q, *J*<sub>C-F</sub> = 260.3 Hz), 120.3 (q, *J*<sub>C-F</sub> = 259.9 Hz), 119.9 (d, *J*<sub>c-p</sub> = 13.8 Hz), 119.5 (d, *J*<sub>c-p</sub> = 12.0 Hz), 64.7, 44.3 (d, *J*<sub>c-p</sub> = 3.9 Hz), 30.8, 19.2, 18.4, 14.7 (d, *J*<sub>c-p</sub> = 2.2 Hz), 13.8.

<sup>31</sup>P NMR (162 MHz, CDCl<sub>3</sub>) δ 25.14.

<sup>19</sup>F NMR (376 MHz, CDCl<sub>3</sub>) δ -57.56, -57.58.

HRMS (ESI) *m/z*: [M+Na]<sup>+</sup> Calcd. for C<sub>29</sub>H<sub>29</sub>F<sub>6</sub>N<sub>2</sub>NaO<sub>5</sub>P: 653.1613; found: 653.1616.

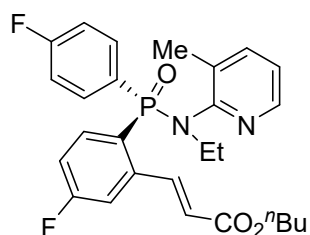

**butyl (*R, E*)-3-(2-((ethyl(3-methylpyridin-2-yl)amino)(4-fluorophenyl)phosphoryl)-5-fluorophenyl)acrylate **3g****

A purification by flash chromatography in petroleum ether : acetone = 4 : 1 gave **3g** as a yellow foam (34.8 mg, 70%). The *ee* value was determined by HPLC analysis on a Chiralcel IA column (hexane/isopropanol = 85/15, flow = 0.8 mL/min) with  $t_r$  = 16.9 min (minor), 22.2 min (major): 88% *ee*.

The absolute stereochemistry was assigned by analogy to compound **3a**.

**<sup>1</sup>H NMR (400 MHz, CDCl<sub>3</sub>)**  $\delta$  8.50 – 8.41 (m, 2H), 8.25 (dd,  $J$  = 4.8, 1.9 Hz, 1H), 7.73 – 7.63 (m, 2H), 7.30 (dd,  $J$  = 7.6, 1.9 Hz, 1H), 7.21 (dt,  $J$  = 9.9, 3.1 Hz, 1H), 7.15 (tt,  $J$  = 8.3, 2.1 Hz, 1H), 6.99 – 6.89 (m, 3H), 6.09 (d,  $J$  = 15.9 Hz, 1H), 4.21 – 4.09 (m, 2H), 3.76 – 3.65 (m, 2H), 2.17 (s, 3H), 1.69 – 1.61 (m, 2H), 1.46 – 1.35 (m, 2H), 1.03 (t,  $J$  = 7.1 Hz, 3H), 0.95 (t,  $J$  = 7.4 Hz, 3H).

**<sup>13</sup>C NMR (101 MHz, CDCl<sub>3</sub>)**  $\delta$  166.2, 164.9 (dd,  $J_{C-F}$  = 254.4 Hz,  $J_{C-P}$  = 3.2 Hz), 164.81 (dd,  $J_{C-F}$  = 254.2 Hz,  $J_{C-P}$  = 3.1 Hz), 153.7 (d,  $J_{C-P}$  = 3.9 Hz), 146.7, 142.2 (dd,  $J_{C-P}$  = 4.3 Hz,  $J_{C-F}$  = 2.2 Hz), 142.1 (d,  $J_{C-P}$  = 8.3 Hz), 139.8, 136.9 (dd,  $J_{C-P}$  = 11.8 Hz,  $J_{C-F}$  = 8.8 Hz), 135.2 (dd,  $J_{C-P}$  = 11.3 Hz,  $J_{C-F}$  = 8.9 Hz), 133.0 (d,  $J_{C-P}$  = 2.8 Hz), 128.4 (dd,  $J_{C-P}$  = 126.7 Hz,  $J_{C-F}$  = 3.0 Hz), 127.8 (dd,  $J_{C-P}$  = 129.8 Hz,  $J_{C-F}$  = 3.4 Hz), 122.1, 121.9, 116.1 (dd,  $J_{C-F}$  = 20.8 Hz,  $J_{C-P}$  = 14.1 Hz), 115.4 (dd,  $J_{C-F}$  = 21.4 Hz,  $J_{C-P}$  = 14.0 Hz), 114.7 (dd,  $J_{C-F}$  = 22.3 Hz,  $J_{C-P}$  = 12.4 Hz), 64.6, 44.4 (d,  $J_{C-P}$  = 3.9 Hz), 30.8, 19.2, 18.5, 14.7 (d,  $J_{C-P}$  = 2.7 Hz), 13.8.

**<sup>31</sup>P NMR (162 MHz, CDCl<sub>3</sub>)**  $\delta$  25.92.

**<sup>19</sup>F NMR (376 MHz, CDCl<sub>3</sub>)**  $\delta$  -106.74, -107.29.

**HRMS (ESI) m/z:** [M+Na]<sup>+</sup> Calcd. for C<sub>27</sub>H<sub>29</sub>F<sub>2</sub>N<sub>2</sub>NaO<sub>3</sub>P: 521.1779; found: 521.1782.

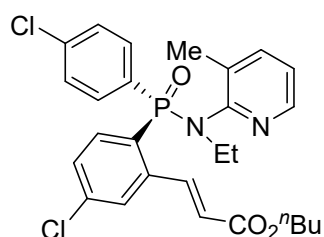

**butyl (*R, E*)-3-(5-chloro-2-((4-chlorophenyl)(ethyl(3-methylpyridin-2-yl)amino)phosphoryl)phenyl)acrylate **3h****

A purification by flash chromatography in petroleum ether : ethyl acetate = 3 : 1 gave **3h** as a yellow solid (29.7 mg, 56%). The *ee* value was determined by HPLC analysis on a Chiralcel IA column (hexane/isopropanol = 70/30, flow = 0.7 mL/min) with  $t_r$  = 9.7 min (minor), 18.4 min (major): 94% *ee*.

The absolute stereochemistry was assigned by analogy to compound **3a**.

**m.p.** 103.0 – 104.5 °C

**<sup>1</sup>H NMR (400 MHz, CDCl<sub>3</sub>)** δ 8.45 – 8.34 (m, 2H), 8.25 (dd, *J* = 4.8, 1.9 Hz, 1H), 7.66 – 7.57 (m, 2H), 7.50 (dd, *J* = 4.0, 2.0 Hz, 1H), 7.44 (dt, *J* = 8.3, 2.0 Hz, 1H), 7.32 (dd, *J* = 7.6, 1.9 Hz, 1H), 7.23 (dd, *J* = 8.4, 2.6 Hz, 2H), 6.98 (dd, *J* = 7.6, 4.7 Hz, 1H), 6.10 (d, *J* = 15.8 Hz, 1H), 4.21 – 4.07 (m, 2H), 3.75 – 3.65 (m, 2H), 2.18 (s, 3H), 1.69 – 1.60 (m, 2H), 1.46 – 1.35 (m, 2H), 1.04 (t, *J* = 7.1 Hz, 3H), 0.95 (t, *J* = 7.4 Hz, 3H).

**<sup>13</sup>C NMR (101 MHz, CDCl<sub>3</sub>)** δ 166.2, 153.5 (d, *J*<sub>c-p</sub> = 4.3 Hz), 150.0, 146.7, 141.9 (d, *J*<sub>c-p</sub> = 4.3 Hz), 140.9 (d, *J*<sub>c-p</sub> = 10.3 Hz), 139.9, 138.5 (d, *J*<sub>c-p</sub> = 9.0 Hz), 135.7 (d, *J*<sub>c-p</sub> = 11.1 Hz), 134.0 (d, *J*<sub>c-p</sub> = 10.9 Hz), 132.9 (d, *J*<sub>c-p</sub> = 3.0 Hz), 130.4 (d, *J*<sub>c-p</sub> = 125.6 Hz), 130.0 (d, *J*<sub>c-p</sub> = 128.2 Hz), 129.1 (d, *J*<sub>c-p</sub> = 13.4 Hz), 128.5 (d, *J*<sub>c-p</sub> = 13.8 Hz), 127.8 (d, *J*<sub>c-p</sub> = 11.8 Hz), 122.3, 122.1, 64.7, 44.4 (d, *J*<sub>c-p</sub> = 4.3 Hz), 30.8, 19.3, 18.5, 14.7 (d, *J*<sub>c-p</sub> = 2.4 Hz), 13.9.

**<sup>31</sup>P NMR (162 MHz, CDCl<sub>3</sub>)** δ 26.13.

**HRMS (ESI) m/z:** [M+Na]<sup>+</sup> Calcd. for C<sub>27</sub>H<sub>29</sub>Cl<sub>2</sub>N<sub>2</sub>NaO<sub>3</sub>P: 553.1186; found: 553.1191.

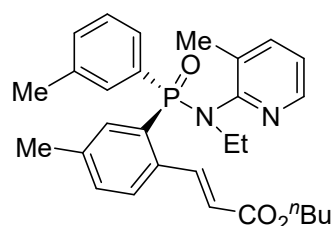

**butyl (*R, E*)-3-(2-((ethyl(3-methylpyridin-2-yl)amino)(*m*-tolyl)phosphoryl)-4-methylphenyl)acrylate **3i****

A purification by flash chromatography in petroleum ether : acetone = 4 : 1 gave **3i** as a yellow foam (38.2 mg, 78%). The *ee* value was determined by HPLC analysis on a Chiralcel IA column (hexane/isopropanol = 70/30, flow = 1.0 mL/min) with  $t_r$  = 5.5 min (minor), 6.8 min (major): 96% *ee*.

The absolute stereochemistry was assigned by analogy to compound **3a**.

**<sup>1</sup>H NMR (400 MHz, CDCl<sub>3</sub>)** δ 8.46 (d, *J*=15.8 Hz, 1H), 8.27 – 8.18 (m, 2H), 7.57 – 7.50 (m, 2H), 7.40 (dd, *J* = 8.0, 5.0 Hz, 1H), 7.29 (dd, *J* = 7.6, 1.9 Hz, 1H), 7.23 (d, *J* = 8.2 Hz, 1H), 7.18 – 7.12 (m, 2H), 6.92 (dd, *J* = 7.5, 4.7 Hz, 1H), 6.04 (d, *J* = 15.8 Hz, 1H), 4.21 – 4.08 (m, 2H), 3.77 – 3.64 (m, 2H), 2.42 (s, 3H), 2.24 (s, 3H), 2.20 (s, 3H), 1.70 – 1.61 (m, 2H), 1.46 – 1.35 (m, 2H), 1.03 (t, *J* = 7.1 Hz, 3H), 0.94 (t, *J* = 7.4 Hz, 3H).

**<sup>13</sup>C NMR (101 MHz, CDCl<sub>3</sub>)** δ 166.8, 154.1 (d, *J*<sub>c-p</sub> = 3.1 Hz), 146.5, 143.6 (d, *J*<sub>c-p</sub> = 4.4 Hz), 139.4, 139.3 (d, *J*<sub>c-p</sub> = 12.6 Hz), 137.8 (d, *J*<sub>c-p</sub> = 12.6 Hz), 136.0 (d, *J*<sub>c-p</sub> = 9.1 Hz), 135.0 (d, *J*<sub>c-p</sub> = 9.7 Hz), 133.2 (d, *J*<sub>c-p</sub> = 9.9 Hz), 132.8 (d, *J*<sub>c-p</sub> = 3.2 Hz), 132.5 (d, *J*<sub>c-p</sub> = 2.8 Hz), 132.4 (d, *J*<sub>c-p</sub> = 3.1 Hz), 132.2 (d, *J*<sub>c-p</sub> = 120.7 Hz), 132.1 (d, *J*<sub>c-p</sub> = 125.6 Hz), 129.7 (d, *J*<sub>c-p</sub> = 10.1 Hz), 127.8 (d, *J*<sub>c-p</sub> = 13.4 Hz), 127.5 (d, *J*<sub>c-p</sub> = 11.7 Hz), 121.6, 119.7, 64.3, 44.4 (d, *J*<sub>c-p</sub> = 3.8 Hz), 30.9, 21.6, 21.4, 19.3, 18.6, 14.7 (d, *J*<sub>c-p</sub> = 3.0 Hz), 13.9.

**<sup>31</sup>P NMR (162 MHz, CDCl<sub>3</sub>)** δ 27.91.

**HRMS (ESI) m/z:** [M+Na]<sup>+</sup> Calcd. for C<sub>29</sub>H<sub>35</sub>N<sub>2</sub>NaO<sub>3</sub>P: 513.2280; found: 513.2283.

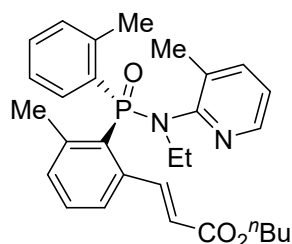

**butyl (*R, E*)-3-(2-((ethyl(3-methylpyridin-2-yl)amino)(*o*-tolyl)phosphoryl)-3-methylphenyl)acrylate **3j****

A purification by flash chromatography in petroleum ether : acetone = 4 : 1 gave **3j** as a yellow foam (37.7 mg, 77%). The *ee* value was determined by HPLC analysis on a Chiralcel IA column (hexane/isopropanol = 85/15, flow = 0.8 mL/min) with *t<sub>r</sub>* = 9.7 min (major), 13.4 min (minor): 88% *ee*.

The absolute stereochemistry was assigned by analogy to compound **3a**.

**<sup>1</sup>H NMR (400 MHz, CDCl<sub>3</sub>)** δ 8.51 – 8.31 (m, 1H), 8.11 (dd, *J* = 4.7, 1.9 Hz, 1H), 7.97 (d, *J* = 15.6 Hz, 1H), 7.32 – 7.26 (m, 3H), 7.18 (td, *J* = 7.7, 1.6 Hz, 1H), 7.10 – 7.04 (m, 2H), 6.96 (dd, *J* = 7.8, 4.2 Hz, 1H), 6.88 (dd, *J* = 7.5, 4.7 Hz, 1H), 5.60 (d, *J* = 15.6 Hz, 1H), 4.15 – 3.82 (m, 4H), 2.64 (s, 3H), 2.21 (s, 3H), 2.16 (s, 3H), 1.69 – 1.59 (m, 2H), 1.46 – 1.35 (m, 2H), 1.15 (t, *J* = 7.1 Hz, 3H), 0.96 (t, *J* = 7.4 Hz, 3H).

**<sup>13</sup>C NMR (101 MHz, CDCl<sub>3</sub>)** δ 166.4, 154.0 (d, *J*<sub>c-p</sub> = 2.5 Hz), 146.1 (d, *J*<sub>c-p</sub> = 5.1 Hz), 145.9, 145.2 (d, *J*<sub>c-p</sub> = 8.7 Hz), 142.3 (d, *J*<sub>c-p</sub> = 11.6 Hz), 139.8, 139.6 (d, *J*<sub>c-p</sub> = 10.7 Hz), 135.2 (d, *J*<sub>c-p</sub> = 125.9 Hz), 133.2 (d, *J*<sub>c-p</sub> = 11.5 Hz), 132.5 (d, *J*<sub>c-p</sub> = 10.3

Hz), 131.5 (d,  $J_{\text{c-p}} = 12.4$  Hz), 131.35 (d,  $J_{\text{c-p}} = 2.8$  Hz), 131.28 (d,  $J_{\text{c-p}} = 2.8$  Hz), 131.2 (d,  $J_{\text{c-p}} = 3.7$  Hz), 129.8 (d,  $J_{\text{c-p}} = 115.3$  Hz), 126.2 (d,  $J_{\text{c-p}} = 10.9$  Hz), 125.2 (d,  $J_{\text{c-p}} = 13.1$  Hz), 121.4, 119.2, 64.2, 43.8 (d,  $J_{\text{c-p}} = 3.0$  Hz), 30.8, 23.4 (d,  $J_{\text{c-p}} = 3.7$  Hz), 21.2 (d,  $J_{\text{c-p}} = 4.3$  Hz), 19.3, 18.5, 14.9 (d,  $J_{\text{c-p}} = 2.5$  Hz), 13.9.

$^{31}\text{P}$  NMR (162 MHz,  $\text{CDCl}_3$ )  $\delta$  31.59.

HRMS (ESI)  $m/z$ :  $[\text{M}+\text{Na}]^+$  Calcd. for  $\text{C}_{29}\text{H}_{35}\text{N}_2\text{NaO}_3\text{P}$ : 513.2280; found: 513.2283.

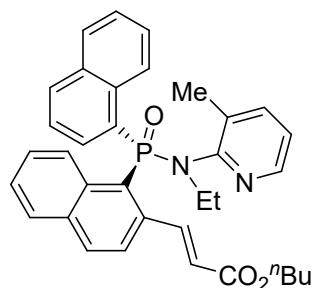

**butyl (*R, E*)-3-(1-((ethyl(3-methylpyridin-2-yl)amino)(naphthalen-1-yl)phosphoryl)naphthalen-2-yl)acrylate **3k****

A purification by flash chromatography in petroleum ether : ethyl acetate = 2 : 1 gave **3k** as a yellow foam (23.0 mg, 41%). The *ee* value was determined by HPLC analysis on a Chiralcel OD-H column (hexane/isopropanol = 90/10, flow = 0.8 mL/min) with  $t_r$  = 14.0 min (major), 19.8 min (minor): 92% *ee*.

The absolute stereochemistry was assigned by analogy to compound **3a**.

$^1\text{H}$  NMR (400 MHz,  $\text{CDCl}_3$ )  $\delta$  9.77 (d,  $J = 8.8$  Hz, 1H), 8.94 – 8.84 (m, 1H), 8.12 (d,  $J = 8.6$  Hz, 1H), 8.08 (dd,  $J = 4.7, 1.9$  Hz, 1H), 8.03 (d,  $J = 15.8$  Hz, 1H), 7.92 (d,  $J = 8.2$  Hz, 1H), 7.79 – 7.71 (m, 3H), 7.64 – 7.55 (m, 2H), 7.53 – 7.46 (m, 1H), 7.37 – 7.30 (m, 1H), 7.20 – 7.10 (m, 2H), 7.02 (dd,  $J = 8.5, 4.3$  Hz, 1H), 6.81 (dd,  $J = 7.5, 4.7$  Hz, 1H), 5.27 (d,  $J = 15.8$  Hz, 1H), 4.22 – 4.12 (m, 2H), 4.06 (dt,  $J = 10.8, 6.7$  Hz, 1H), 3.95 (dt,  $J = 10.8, 6.7$  Hz, 1H), 2.10 (s, 3H), 1.67 – 1.57 (m, 2H), 1.47 – 1.35 (m, 2H), 1.25 (t,  $J = 7.1$  Hz, 3H), 0.99 (t,  $J = 7.4$  Hz, 3H).

$^{13}\text{C}$  NMR (101 MHz,  $\text{CDCl}_3$ )  $\delta$  166.0, 153.8 (d,  $J_{\text{c-p}} = 3.4$  Hz), 146.2, 146.1, 145.9, 139.8, 139.2 (d,  $J_{\text{c-p}} = 10.2$  Hz), 134.8 (d,  $J_{\text{c-p}} = 8.6$  Hz), 134.0 (d,  $J_{\text{c-p}} = 10.8$  Hz), 133.8 (d,  $J_{\text{c-p}} = 10.3$  Hz), 133.2 (d,  $J_{\text{c-p}} = 125.9$  Hz), 133.1 (d,  $J_{\text{c-p}} = 2.9$  Hz), 132.7 (d,  $J_{\text{c-p}} = 3.6$  Hz), 132.6 (d,  $J_{\text{c-p}} = 3.5$  Hz), 131.5 (d,  $J_{\text{c-p}} = 3.7$  Hz), 129.0 (d,  $J_{\text{c-p}} = 4.6$  Hz), 128.5 (d,  $J_{\text{c-p}} = 9.4$  Hz), 127.9 (d,  $J_{\text{c-p}} = 115.8$  Hz), 127.3, 126.9, 126.7, 126.62, 126.57, 126.0, 125.6 (d,  $J_{\text{c-p}} = 12.6$  Hz), 124.7 (d,  $J_{\text{c-p}} = 15.2$  Hz), 121.5, 120.2, 64.1, 43.7 (d,  $J_{\text{c-p}} = 3.6$  Hz), 30.8, 19.3, 18.8, 15.0 (d,  $J_{\text{c-p}} = 2.8$  Hz), 13.9.

$^{31}\text{P}$  NMR (162 MHz,  $\text{CDCl}_3$ )  $\delta$  32.52.

HRMS (ESI)  $m/z$ :  $[\text{M}+\text{Na}]^+$  Calcd. for  $\text{C}_{35}\text{H}_{35}\text{N}_2\text{NaO}_3\text{P}$ : 585.2276; found: 585.2283.

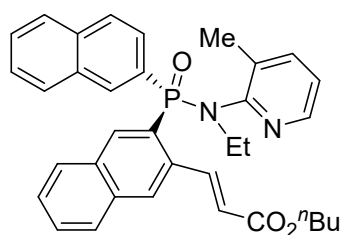

**butyl (*R, E*)-3-(3-((ethyl(3-methylpyridin-2-yl)amino)(naphthalen-2-yl)phosphoryl)naphthalen-2-yl)acrylate **3l****

A purification by flash chromatography in petroleum ether : ethyl acetate = 2 : 1 gave **3l** as a yellow foam (36.5 mg, 64%). The *ee* value was determined by HPLC analysis on a Chiralcel AD-H column (hexane/isopropanol = 70/30, flow = 1.0 mL/min) with *tr* = 12.6 min (major), 28.8 min (minor): 88% *ee*.

The absolute stereochemistry was assigned by analogy to compound **3a**.

**<sup>1</sup>H NMR (400 MHz, CDCl<sub>3</sub>)** δ 9.15 (d, *J* = 15.7 Hz, 1H), 8.59 (d, *J* = 15.7 Hz, 1H), 8.48 (d, *J* = 14.1 Hz, 1H), 8.35 – 8.25 (m, 1H), 8.09 – 8.02 (m, 1H), 7.98 (d, *J* = 4.5 Hz, 1H), 7.86 – 7.78 (m, 2H), 7.74 (d, *J* = 8.1 Hz, 1H), 7.66 – 7.43 (m, 6H), 7.24 (d, *J* = 12.4 Hz, 2H), 6.92 (dd, *J* = 7.5, 4.7 Hz, 1H), 6.17 (d, *J* = 15.7 Hz, 1H), 4.18 – 4.05 (m, 2H), 3.95 – 3.81 (m, 2H), 2.24 (s, 3H), 1.67 – 1.57 (m, 2H), 1.44 – 1.33 (m, 2H), 1.10 (t, *J* = 7.1 Hz, 3H), 0.94 (t, *J* = 7.4 Hz, 3H).

**<sup>13</sup>C NMR (101 MHz, CDCl<sub>3</sub>)** δ 166.6, 154.1 (d, *J*<sub>c-p</sub> = 3.5 Hz), 146.7, 144.1 (d, *J*<sub>c-p</sub> = 3.3 Hz), 139.6, 136.3 (d, *J*<sub>c-p</sub> = 10.1 Hz), 134.9 (d, *J*<sub>c-p</sub> = 9.6 Hz), 134.6 (d, *J*<sub>c-p</sub> = 2.2 Hz), 134.5 (d, *J*<sub>c-p</sub> = 2.3 Hz), 133.0 (d, *J*<sub>c-p</sub> = 2.8 Hz), 132.7 (d, *J*<sub>c-p</sub> = 14.0 Hz), 132.3 (d, *J*<sub>c-p</sub> = 14.0 Hz), 129.59 (d, *J*<sub>c-p</sub> = 122.9 Hz), 129.29 (d, *J*<sub>c-p</sub> = 126.3 Hz), 129.25, 129.18, 128.6, 128.2 (d, *J*<sub>c-p</sub> = 3.1 Hz), 127.8, 127.5 (d, *J*<sub>c-p</sub> = 12.2 Hz), 127.4 (d, *J*<sub>c-p</sub> = 10.8 Hz), 126.6, 121.9, 120.5, 64.3, 44.7 (d, *J*<sub>c-p</sub> = 3.9 Hz), 30.9, 19.3, 18.7, 14.8 (d, *J*<sub>c-p</sub> = 2.5 Hz), 13.9.

**<sup>31</sup>P NMR (162 MHz, CDCl<sub>3</sub>)** δ 28.03.

**HRMS (ESI) m/z:** [M+Na]<sup>+</sup> Calcd. for C<sub>35</sub>H<sub>35</sub>N<sub>2</sub>NaO<sub>3</sub>P: 585.2281; found: 585.2283.

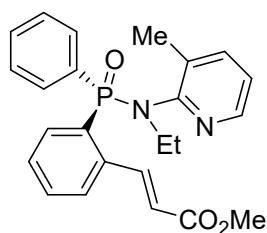

**diethyl (*R, E*) - (2-((ethyl(3-methylpyridin-2-yl)amino)(phenyl)phosphoryl)styryl)phosphonate **3m****

A purification by flash chromatography in petroleum ether : ethyl acetate = 4 : 1 gave **3m** as a yellow foam (25.3 mg, 60%). The *ee* value was determined by HPLC analysis on a Chiralcel AD-H column (hexane/isopropanol = 70/30, flow = 1.0 mL/min) with *t<sub>r</sub>* = 8.0 min (minor), 9.5 min (major): 95% *ee*.

The absolute stereochemistry was assigned by analogy to compound **3a**.

**<sup>1</sup>H NMR (400 MHz, CDCl<sub>3</sub>)** δ 8.60 (d, *J* = 15.8 Hz, 1H), 8.42 – 8.32 (m, 1H), 8.26 (dd, *J* = 4.8, 1.9 Hz, 1H), 7.75 – 7.65 (m, 2H), 7.57 – 7.49 (m, 1H), 7.48 – 7.42 (m, 2H), 7.38 – 7.31 (m, 1H), 7.29 – 7.22 (m, 3H), 6.93 (dd, *J* = 7.6, 4.7 Hz, 1H), 6.10 (d, *J* = 15.9 Hz, 1H), 3.79 – 3.65 (m, 5H), 2.20 (s, 3H), 1.03 (t, *J* = 7.1 Hz, 3H).

**<sup>13</sup>C NMR (101 MHz, CDCl<sub>3</sub>)** δ 167.0, 154.0 (d, *J<sub>c-p</sub>* = 3.7 Hz), 146.6, 143.9 (d, *J<sub>c-p</sub>* = 4.5 Hz), 139.5, 139.2 (d, *J<sub>c-p</sub>* = 9.4 Hz), 134.2 (d, *J<sub>c-p</sub>* = 10.3 Hz), 133.1 (d, *J<sub>c-p</sub>* = 3.2 Hz), 132.6 (d, *J<sub>c-p</sub>* = 9.7 Hz), 132.4 (d, *J<sub>c-p</sub>* = 122.6 Hz), 132.0 (d, *J<sub>c-p</sub>* = 125.4 Hz), 131.9 (d, *J<sub>c-p</sub>* = 2.8 Hz), 131.7 (d, *J<sub>c-p</sub>* = 2.8 Hz), 129.1 (d, *J<sub>c-p</sub>* = 13.1 Hz), 128.0 (d, *J<sub>c-p</sub>* = 12.6 Hz), 127.7 (d, *J<sub>c-p</sub>* = 11.0 Hz), 121.8, 120.2, 51.7, 44.5 (d, *J<sub>c-p</sub>* = 4.2 Hz), 18.6, 14.7 (d, *J<sub>c-p</sub>* = 2.8 Hz).

**<sup>31</sup>P NMR (162 MHz, CDCl<sub>3</sub>)** δ 27.74.

**HRMS (ESI) m/z:** [M+Na]<sup>+</sup> Calcd. for C<sub>26</sub>H<sub>32</sub>N<sub>2</sub>NaO<sub>4</sub>P<sub>2</sub>: 443.1494; found: 443.1500.

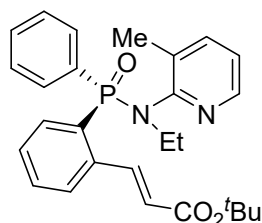

***tert*-butyl (*R, E*)-3-(2-((ethyl(3-methylpyridin-2-yl)amino)(phenyl)phosphoryl)phenyl)acrylate **3n****

A purification by flash chromatography in petroleum ether : ethyl acetate = 1 : 1 gave **3n** as a yellow foam (33.1 mg, 72%). The *ee* value was determined by HPLC analysis on a Chiralcel IA column (hexane/isopropanol = 70 / 30, flow = 1.0 mL/min) with *t<sub>r</sub>* = 5.6 min (minor), 6.3 min (major): 93% *ee*.

The absolute stereochemistry was assigned by analogy to compound **3a**.

**<sup>1</sup>H NMR (400 MHz, CDCl<sub>3</sub>)** δ 8.48 – 8.40 (m, 1H), 8.36 (d, *J* = 15.8 Hz, 1H), 8.26 (dd, *J* = 4.8, 1.9 Hz, 1H), 7.74 – 7.60 (m, 2H), 7.54 – 7.40 (m, 3H), 7.37 – 7.31 (m, 1H), 7.30 – 7.19 (m, 3H), 6.93 (dd, *J* = 7.6, 4.7 Hz, 1H), 6.00 (d, *J* = 15.8 Hz, 1H), 3.80 – 3.69 (m, 2H), 2.19 (s, 3H), 1.48 (s, 9H), 1.04 (t, *J* = 7.1 Hz, 3H).

**<sup>13</sup>C NMR (101 MHz, CDCl<sub>3</sub>)** δ 165.8, 154.0 (d, *J<sub>c-p</sub>* = 3.7 Hz), 146.6, 142.5 (d, *J<sub>c-p</sub>* = 4.5 Hz), 139.5, 139.3 (d, *J<sub>c-p</sub>* = 9.2 Hz), 134.0 (d, *J<sub>c-p</sub>* = 10.3 Hz), 133.1 (d, *J<sub>c-p</sub>* = 2.9

Hz), 132.6 (d,  $J_{\text{c-p}} = 9.7$  Hz), 132.3 (d,  $J_{\text{c-p}} = 122.9$  Hz), 131.9 (d,  $J_{\text{c-p}} = 124.5$  Hz), 131.8 (d,  $J_{\text{c-p}} = 2.8$  Hz), 131.6 (d,  $J_{\text{c-p}} = 2.8$  Hz), 128.8 (d,  $J_{\text{c-p}} = 12.7$  Hz), 127.9 (d,  $J_{\text{c-p}} = 12.8$  Hz), 127.7 (d,  $J_{\text{c-p}} = 11.1$  Hz), 122.6, 121.8, 80.4, 44.4 (d,  $J_{\text{c-p}} = 3.8$  Hz), 28.2, 18.6, 14.7 (d,  $J_{\text{c-p}} = 2.8$  Hz).

$^{31}\text{P}$  NMR (162 MHz,  $\text{CDCl}_3$ )  $\delta$  28.00.

HRMS (ESI)  $m/z$ :  $[\text{M}+\text{Na}]^+$  Calcd. for  $\text{C}_{27}\text{H}_{31}\text{N}_2\text{NaO}_3\text{P}$ : 485.1964; found: 485.1970.

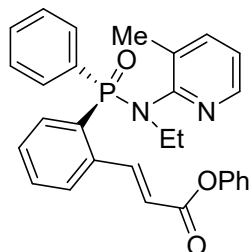

**phenyl (*R, E*)-3-(2-((ethyl(3-methylpyridin-2-yl)amino)(phenyl)phosphoryl)phenyl)acrylate **3o****

A purification by flash chromatography in petroleum ether : ethyl acetate : dichloromethane = 2 : 2 : 1 gave **3o** as a yellow foam (28.7 mg, 60%). The *ee* value was determined by HPLC analysis on a Chiralcel IA column (hexane/isopropanol = 85/15, flow = 0.8 mL/min) with  $t_r$  = 18.7 min (minor), 26.8 min (major): 93% *ee*.

The absolute stereochemistry was assigned by analogy to compound **3a**.

$^1\text{H}$  NMR (400 MHz,  $\text{CDCl}_3$ )  $\delta$  8.75 (d,  $J = 15.8$  Hz, 1H), 8.52 – 8.42 (m, 1H), 8.27 (dd,  $J = 4.8, 1.9$  Hz, 1H), 7.76 – 7.66 (m, 2H), 7.64 – 7.57 (m, 1H), 7.55 – 7.45 (m, 2H), 7.43 – 7.32 (m, 3H), 7.31 – 7.19 (m, 4H), 7.17 – 7.08 (m, 2H), 6.94 (dd,  $J = 7.6, 4.7$  Hz, 1H), 6.27 (d,  $J = 15.8$  Hz, 1H), 3.83 – 3.68 (m, 2H), 2.19 (s, 3H), 1.05 (t,  $J = 7.1$  Hz, 3H).

$^{13}\text{C}$  NMR (101 MHz,  $\text{CDCl}_3$ )  $\delta$  164.9, 153.9 (d,  $J_{\text{c-p}} = 4.0$  Hz), 150.9, 146.7, 145.5 (d,  $J_{\text{c-p}} = 4.5$  Hz), 139.6, 138.7 (d,  $J_{\text{c-p}} = 9.4$  Hz), 134.2 (d,  $J_{\text{c-p}} = 10.0$  Hz), 133.1 (d,  $J_{\text{c-p}} = 2.9$  Hz), 132.8 (d,  $J_{\text{c-p}} = 122.1$  Hz), 132.6 (d,  $J_{\text{c-p}} = 10.1$  Hz), 132.0 (d,  $J_{\text{c-p}} = 2.8$  Hz), 131.9 (d,  $J_{\text{c-p}} = 125.5$  Hz), 131.7 (d,  $J_{\text{c-p}} = 2.9$  Hz), 129.6, 129.5, 128.0 (d,  $J_{\text{c-p}} = 13.1$  Hz), 127.8 (d,  $J_{\text{c-p}} = 11.0$  Hz), 125.8, 121.9, 121.8, 119.6, 44.6 (d,  $J_{\text{c-p}} = 3.9$  Hz), 18.6, 14.8 (d,  $J_{\text{c-p}} = 2.5$  Hz).

$^{31}\text{P}$  NMR (162 MHz,  $\text{CDCl}_3$ )  $\delta$  27.62.

HRMS (ESI)  $m/z$ :  $[\text{M}+\text{Na}]^+$  Calcd. for  $\text{C}_{29}\text{H}_{27}\text{N}_2\text{NaO}_3\text{P}$ : 505.1649; found: 505.1657.



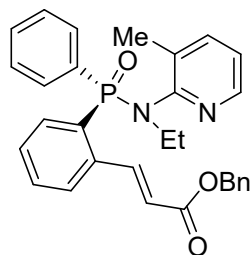

**benzyl (*R, E*)-3-(2-((ethyl(3-methylpyridin-2-yl)amino)(phenyl)phosphoryl)phenyl)acrylate **3p****

A purification by flash chromatography in petroleum ether : ethyl acetate = 1 : 1 gave **3p** as a yellow foam (30.4 mg, 61%). The *ee* value was determined by HPLC analysis on a Chiralcel IA column (hexane/isopropanol = 80/20, flow = 1.0 mL/min) with  $t_r$  = 34.1 min (minor), 49.7 min (major): 95% *ee*.

The absolute stereochemistry was assigned by analogy to compound **3a**.

<sup>1</sup>H NMR (400 MHz, CDCl<sub>3</sub>)  $\delta$  8.59 (d,  $J$  = 15.8 Hz, 1H), 8.47 – 8.36 (m, 1H), 8.25 (dd,  $J$  = 4.8, 1.9 Hz, 1H), 7.71 – 7.62 (m, 2H), 7.55 – 7.24 (m, 10H), 7.20 – 7.13 (m, 2H), 6.92 (dd,  $J$  = 7.6, 4.7 Hz, 1H), 6.14 (d,  $J$  = 15.8 Hz, 1H), 5.28 – 4.11 (m, 2H), 3.79 – 3.67 (m, 2H), 2.16 (s, 3H), 1.03 (t,  $J$  = 7.1 Hz, 3H).

<sup>13</sup>C NMR (101 MHz, CDCl<sub>3</sub>)  $\delta$  166.2, 153.9 (d,  $J_{c-p}$  = 3.7 Hz), 146.6, 144.2 (d,  $J_{c-p}$  = 4.5 Hz), 139.5, 139.0 (d,  $J_{c-p}$  = 9.3 Hz), 136.3, 134.2 (d,  $J_{c-p}$  = 10.2 Hz), 133.1 (d,  $J_{c-p}$  = 2.9 Hz), 132.56 (d,  $J_{c-p}$  = 9.9 Hz), 132.55 (d,  $J_{c-p}$  = 122.4 Hz), 131.9 (d,  $J_{c-p}$  = 2.9 Hz), 131.8 (d,  $J_{c-p}$  = 125.6 Hz), 131.6 (d,  $J_{c-p}$  = 2.9 Hz), 129.2 (d,  $J_{c-p}$  = 12.6 Hz), 128.6, 128.3, 128.2, 127.9 (d,  $J_{c-p}$  = 12.8 Hz), 127.7 (d,  $J_{c-p}$  = 11.0 Hz), 121.8, 120.2, 66.3, 44.5 (d,  $J_{c-p}$  = 4.1 Hz), 18.6, 14.7 (d,  $J_{c-p}$  = 2.8 Hz).

<sup>31</sup>P NMR (162 MHz, CDCl<sub>3</sub>)  $\delta$  27.70.

HRMS (ESI)  $m/z$ : [M+Na]<sup>+</sup> Calcd. for C<sub>30</sub>H<sub>29</sub>N<sub>2</sub>NaO<sub>3</sub>P: 519.1812; found: 519.1813.

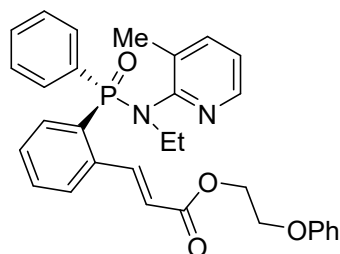

**2-phenoxyethyl (*R, E*)-3-(2-((ethyl(3-methylpyridin-2-yl)amino)(phenyl)phosphoryl)phenyl)acrylate **3q****

A purification by flash chromatography in petroleum ether : ethyl acetate = 2 : 1 gave **3q** as a yellow foam (30.6 mg, 58%). The *ee* value was determined by HPLC analysis

on a Chiralcel IB N-5 column (hexane/isopropanol = 70/30, flow = 1.0 mL/min) with  $t_r$  = 12.7 min (minor), 14.7 min (major): 95% *ee*.

The absolute stereochemistry was assigned by analogy to compound **3a**.

**<sup>1</sup>H NMR (400 MHz, CDCl<sub>3</sub>)**  $\delta$  8.59 (d,  $J$  = 15.8 Hz, 1H), 8.44 – 8.36 (m, 1H), 8.26 (dd,  $J$  = 4.8, 1.8 Hz, 1H), 7.74 – 7.65 (m, 2H), 7.54 – 7.41 (m, 3H), 7.33 – 7.24 (m, 4H), 7.23 – 7.16 (m, 2H), 6.99 – 6.89 (m, 4H), 6.14 (d,  $J$  = 15.8 Hz, 1H), 4.58 – 4.44 (m, 2H), 4.27 – 4.17 (m, 2H), 3.79 – 3.65 (m, 2H), 2.18 (s, 3H), 1.02 (t,  $J$  = 7.1 Hz, 3H).

**<sup>13</sup>C NMR (101 MHz, CDCl<sub>3</sub>)**  $\delta$  166.3, 158.7, 154.0 (d,  $J_{C-P}$  = 3.7 Hz), 146.6, 144.5 (d,  $J_{C-P}$  = 4.4 Hz), 139.5, 139.0 (d,  $J_{C-P}$  = 9.5 Hz), 134.2 (d,  $J_{C-P}$  = 10.2 Hz), 133.0 (d,  $J_{C-P}$  = 2.9 Hz), 132.63 (d,  $J_{C-P}$  = 9.9 Hz), 132.61 (d,  $J_{C-P}$  = 122.3 Hz), 132.0 (d,  $J_{C-P}$  = 126.4 Hz), 131.9 (d,  $J_{C-P}$  = 2.8 Hz), 131.7 (d,  $J_{C-P}$  = 2.9 Hz), 129.6, 129.2 (d,  $J_{C-P}$  = 13.0 Hz), 128.0 (d,  $J_{C-P}$  = 13.0 Hz), 127.7 (d,  $J_{C-P}$  = 11.0 Hz), 121.8, 121.2, 119.9, 114.8, 66.0, 62.9, 44.5 (d,  $J_{C-P}$  = 3.8 Hz), 18.6, 14.7 (d,  $J_{C-P}$  = 2.8 Hz).

**<sup>31</sup>P NMR (162 MHz, CDCl<sub>3</sub>)**  $\delta$  27.63.

**HRMS (ESI) m/z:** [M+Na]<sup>+</sup> Calcd. for C<sub>31</sub>H<sub>31</sub>N<sub>2</sub>NaO<sub>4</sub>P: 549.1918; found: 549.1919.

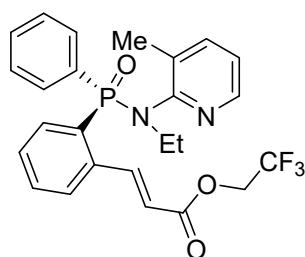

**2,2,2-trifluoroethyl (*R, E*)-3-(2-((ethyl(3-methylpyridin-2-yl)amino)(phenyl)phosphoryl)phenyl)acrylate **3r****

A purification by flash chromatography in petroleum ether : ethyl acetate = 1 : 1 gave **3r** as a yellow foam (29.3 mg, 60%). The *ee* value was determined by HPLC analysis on a Chiralcel IA column (hexane/isopropanol = 90/10, flow = 0.8 mL/min) with  $t_r$  = 39.9 min (minor), 44.6 min (major): 95% *ee*.

The absolute stereochemistry was assigned by analogy to compound **3a**.

**<sup>1</sup>H NMR (400 MHz, CDCl<sub>3</sub>)**  $\delta$  8.69 (d,  $J$  = 15.8 Hz, 1H), 8.51 – 8.42 (m, 1H), 8.28 (dd,  $J$  = 4.8, 1.9 Hz, 1H), 7.71 – 7.61 (m, 2H), 7.58 – 7.43 (m, 3H), 7.38 – 7.31 (m, 1H), 7.30 – 7.19 (m, 3H), 6.95 (dd,  $J$  = 7.5, 4.7 Hz, 1H), 6.15 (d,  $J$  = 15.8 Hz, 1H), 4.65 – 4.43 (m, 2H), 3.81 – 3.68 (m, 2H), 2.17 (s, 3H), 1.05 (t,  $J$  = 7.1 Hz, 3H).

**<sup>13</sup>C NMR (101 MHz, CDCl<sub>3</sub>)**  $\delta$  164.6, 153.9 (d,  $J_{C-P}$  = 3.9 Hz), 146.7, 146.3 (d,  $J_{C-P}$  = 4.5 Hz), 139.6, 138.5 (d,  $J_{C-P}$  = 9.1 Hz), 134.2 (d,  $J_{C-P}$  = 10.1 Hz), 133.2 (d,  $J_{C-P}$  =

2.7 Hz), 133.1 (d,  $J_{C-P}$  = 121.7 Hz), 132.5 (d,  $J_{C-P}$  = 9.8 Hz), 131.9 (d,  $J_{C-P}$  = 2.6 Hz), 131.8 (d,  $J_{C-P}$  = 2.7 Hz), 131.7 (d,  $J_{C-P}$  = 125.4 Hz), 129.7 (d,  $J_{C-P}$  = 12.8 Hz), 128.0 (d,  $J_{C-P}$  = 12.6 Hz), 127.9 (d,  $J_{C-P}$  = 10.8 Hz), 123.2 (q,  $J_{C-F}$  = 278.4 Hz), 121.9, 118.1, 60.3 (q,  $J_{C-F}$  = 36.7 Hz), 44.6 (d,  $J_{C-P}$  = 3.9 Hz), 18.5, 14.8 (d,  $J_{C-P}$  = 2.5 Hz).

$^{31}\text{P}$  NMR (162 MHz,  $\text{CDCl}_3$ )  $\delta$  27.40.

$^{19}\text{F}$  NMR (376 MHz,  $\text{CDCl}_3$ )  $\delta$  -73.60.

HRMS (ESI)  $m/z$ :  $[\text{M}+\text{Na}]^+$  Calcd. for  $\text{C}_{25}\text{H}_{24}\text{F}_3\text{N}_2\text{NaO}_3\text{P}$ : 511.1370; found: 511.1374.

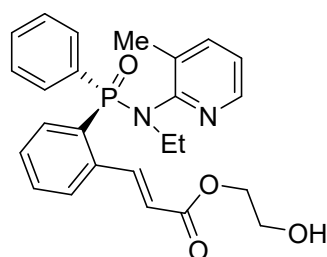

### 2-hydroxyethyl (*R, E*)-3-(2-((ethyl(3-methylpyridin-2-yl)amino)(phenyl)phosphoryl)phenyl)acrylate **3s**

A purification by flash chromatography in methanol: ethyl acetate=1 : 20 gave **3s** as a yellow foam (26.5 mg, 59%). The *ee* value was determined by HPLC analysis on a Chiralcel OD-H column (hexane/isopropanol = 94/6, flow = 0.6 mL/min) with  $t_r$  = 54.2 min (minor), 63.1 min (major): 94% *ee*.

The absolute stereochemistry was assigned by analogy to compound **3a**.

$^1\text{H}$  NMR (400 MHz,  $\text{CDCl}_3$ )  $\delta$  8.57 (d,  $J$  = 15.9 Hz, 1H), 8.35 – 8.23 (m, 2H), 7.84 – 7.76 (m, 2H), 7.49 – 7.38 (m, 4H), 7.37 – 7.30 (m, 2H), 7.28 – 7.26 (m, 1H), 6.96 (dd,  $J$ =7.6, 4.7 Hz, 1H), 6.01 (d,  $J$ =15.8 Hz, 1H), 4.36 – 4.24 (m, 2H), 3.97 – 3.90 (m, 2H), 3.83 – 3.67 (m, 2H), 2.63 (brs, 1H), 2.14 (s, 3H), 1.03 (t,  $J$  = 7.0 Hz, 3H).

$^{13}\text{C}$  NMR (101 MHz,  $\text{CDCl}_3$ )  $\delta$  166.4, 153.7 (d,  $J_{C-P}$  = 3.7 Hz), 146.7, 144.0 (d,  $J_{C-P}$  = 4.8 Hz), 139.8, 138.4 (d,  $J_{C-P}$  = 8.8 Hz), 134.5 (d,  $J_{C-P}$  = 10.3 Hz), 133.2 (d,  $J_{C-P}$  = 2.4 Hz), 132.7 (d,  $J_{C-P}$  = 10.1 Hz), 132.2 (d,  $J_{C-P}$  = 2.7 Hz), 132.0 (d,  $J_{C-P}$  = 2.6 Hz), 131.9 (d,  $J_{C-P}$  = 129.0 Hz), 131.8 (d,  $J_{C-P}$  = 121.5 Hz), 129.2 (d,  $J_{C-P}$  = 13.0 Hz), 128.3 (d,  $J_{C-P}$  = 12.8 Hz), 127.2 (d,  $J_{C-P}$  = 10.5 Hz), 122.1, 119.7, 66.7, 61.1, 45.0 (d,  $J_{C-P}$  = 4.1 Hz), 18.6, 14.6 (d,  $J_{C-P}$  = 2.9 Hz).

$^{31}\text{P}$  NMR (162 MHz,  $\text{CDCl}_3$ )  $\delta$  28.03.

HRMS (ESI)  $m/z$ :  $[\text{M}+\text{Na}]^+$  Calcd. for  $\text{C}_{25}\text{H}_{27}\text{N}_2\text{NaO}_4\text{P}$ : 473.1600; found: 473.1606.

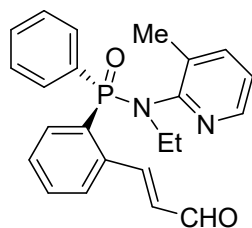

**(*R, E*)-*N*-ethyl-*N*-(3-methylpyridin-2-yl)-*P*-(2-(3-oxoprop-1-en-1-yl)phenyl)-*P*-phenylphosphinic amide **3t****

A purification by flash chromatography in petroleum ether : ethyl acetate = 2 : 1 gave **3t** as a yellow foam (22.2 mg, 57%). The *ee* value was determined by HPLC analysis on a Chiralcel AS-H column (hexane/isopropanol = 95/5, flow = 0.6 mL/min) with  $t_r$  = 43.7 min (major), 59.1 min (minor): 95% *ee*.

The absolute stereochemistry was assigned by analogy to compound **3a**.

**<sup>1</sup>H NMR (400 MHz, CDCl<sub>3</sub>)**  $\delta$  9.64 (d,  $J$  = 7.9 Hz, 1H), 8.80 (d,  $J$  = 15.8 Hz, 1H), 8.39 – 8.27 (m, 2H), 7.72 – 7.59 (m, 3H), 7.54 – 7.46 (m, 2H), 7.40 – 7.34 (m, 1H), 7.32 – 7.24 (m, 3H), 6.96 (dd,  $J$  = 7.6, 4.7 Hz, 1H), 6.44 (dd,  $J$  = 15.8, 7.8 Hz, 1H), 3.75 – 3.65 (m, 2H), 2.19 (s, 3H), 1.04 (t,  $J$  = 7.1 Hz, 3H).

**<sup>13</sup>C NMR (101 MHz, CDCl<sub>3</sub>)**  $\delta$  194.7, 153.8 (d,  $J_{c-p}$  = 3.7 Hz), 152.0 (d,  $J_{c-p}$  = 4.3 Hz), 146.8, 139.6, 138.8 (d,  $J_{c-p}$  = 8.9 Hz), 134.4 (d,  $J_{c-p}$  = 10.4 Hz), 133.3 (d,  $J_{c-p}$  = 3.4 Hz), 132.5 (d,  $J_{c-p}$  = 121.8 Hz), 132.4 (d,  $J_{c-p}$  = 9.8 Hz), 132.1 (d,  $J_{c-p}$  = 2.8 Hz), 131.9 (d,  $J_{c-p}$  = 3.1 Hz), 131.7 (d,  $J_{c-p}$  = 125.7 Hz), 130.4, 130.0 (d,  $J_{c-p}$  = 13.1 Hz), 128.2 (d,  $J_{c-p}$  = 12.8 Hz), 127.9 (d,  $J_{c-p}$  = 10.9 Hz), 122.1, 44.7 (d,  $J_{c-p}$  = 4.1 Hz), 18.6, 14.6 (d,  $J_{c-p}$  = 3.3 Hz).

**<sup>31</sup>P NMR (162 MHz, CDCl<sub>3</sub>)**  $\delta$  28.01.

**HRMS (ESI) m/z:** [M+Na]<sup>+</sup> Calcd. for C<sub>23</sub>H<sub>23</sub>N<sub>2</sub>NaO<sub>2</sub>P: 413.1392; found: 413.1395.

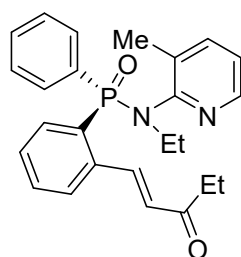

**(*R, E*)-*N*-ethyl-*N*-(3-methylpyridin-2-yl)-*P*-(2-(3-oxopent-1-en-1-yl)phenyl)-*P*-phenylphosphinic amide **3u****

A purification by flash chromatography in toluene : ethyl acetate = 1 : 1 gave **3u** as a yellow foam (24.2 mg, 58%). The *ee* value was determined by HPLC analysis on a

Chiralcel IA column (hexane/isopropanol = 70/30, flow = 1.0 mL/min) with  $t_r$  = 5.5 min (minor), 6.7 min (major): 94% *ee*.

The absolute stereochemistry was assigned by analogy to compound **3a**.

**<sup>1</sup>H NMR (400 MHz, CDCl<sub>3</sub>)**  $\delta$  8.63 (d,  $J$  = 16.5 Hz, 1H), 8.47 – 8.37 (m, 1H), 8.30 (dd,  $J$  = 4.8, 1.9 Hz, 1H), 7.67 – 7.56 (m, 3H), 7.52 – 7.45 (m, 2H), 7.38 – 7.31 (m, 1H), 7.30 – 7.20 (m, 3H), 6.95 (dd,  $J$  = 7.6, 4.7 Hz, 1H), 6.31 (d,  $J$  = 16.5 Hz, 1H), 3.78 – 3.64 (m, 2H), 2.80 – 2.56 (m, 2H), 2.17 (s, 3H), 1.11 – 1.00 (m, 6H).

**<sup>13</sup>C NMR (101 MHz, CDCl<sub>3</sub>)** 202.5, 153.9 (d,  $J_{c-p}$  = 3.7 Hz), 146.8, 142.3 (d,  $J_{c-p}$  = 4.3 Hz), 139.7 (d,  $J_{c-p}$  = 9.4 Hz), 139.5, 134.1 (d,  $J_{c-p}$  = 10.3 Hz), 133.3 (d,  $J_{c-p}$  = 2.8 Hz), 132.3 (d,  $J_{c-p}$  = 9.7 Hz), 132.2 (d,  $J_{c-p}$  = 122.3 Hz), 132.0 (d,  $J_{c-p}$  = 2.8 Hz), 131.9 (d,  $J_{c-p}$  = 125.2 Hz), 131.8 (d,  $J_{c-p}$  = 2.8 Hz), 129.4, 129.2 (d,  $J_{c-p}$  = 13.1 Hz), 128.0 (d,  $J_{c-p}$  = 13.0 Hz), 127.6 (d,  $J_{c-p}$  = 11.1 Hz), 122.0, 44.7 (d,  $J_{c-p}$  = 3.9 Hz), 31.6, 18.6, 14.7 (d,  $J_{c-p}$  = 3.0 Hz), 8.4.

**<sup>31</sup>P NMR (162 MHz, CDCl<sub>3</sub>)**  $\delta$  28.38.

**HRMS (ESI) m/z:** [M+Na]<sup>+</sup> Calcd. for C<sub>25</sub>H<sub>27</sub>N<sub>2</sub>NaO<sub>2</sub>P: 441.1704; found: 441.1708.

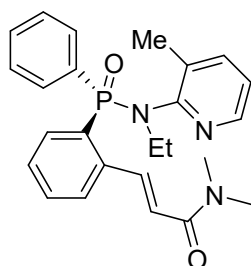

**(*R, E*)-3-(2-((ethyl(3-methylpyridin-2-yl)amino)(phenyl)phosphoryl)phenyl)-*N, N*-dimethylacrylamide **3v****

A purification by flash chromatography in petroleum ether : ethyl acetate = 4 : 1 gave **3v** as a yellow foam (23.5 mg, 54%). The *ee* value was determined by HPLC analysis on a Chiralcel AD-H column (hexane/isopropanol = 70/30, flow = 1.0 mL/min) with  $t_r$  = 8.0 min (minor), 11.0 min (major): 95% *ee*.

The absolute stereochemistry was assigned by analogy to compound **3a**.

**<sup>1</sup>H NMR (400 MHz, CDCl<sub>3</sub>)**  $\delta$  8.46 – 8.36 (m, 1H), 8.25 (dd,  $J$  = 4.8, 1.8 Hz, 1H), 8.10 (d,  $J$  = 15.6 Hz, 1H), 7.74 – 7.65 (m, 2H), 7.51 – 7.40 (m, 3H), 7.36 – 7.30 (m, 1H), 7.30 – 7.20 (m, 3H), 6.91 (dd,  $J$  = 7.5, 4.7 Hz, 1H), 6.47 (d,  $J$  = 15.6 Hz, 1H), 3.76 – 3.64 (m, 2H), 3.02 (s, 3H), 2.98 (s, 3H), 2.23 (s, 3H), 1.01 (t,  $J$  = 7.1 Hz, 3H).

**<sup>13</sup>C NMR (101 MHz, CDCl<sub>3</sub>)**  $\delta$  166.9, 153.9 (d,  $J_{c-p}$  = 3.5 Hz), 146.5, 140.4 (d,  $J_{c-p}$  = 4.5 Hz), 140.3 (d,  $J_{c-p}$  = 9.5 Hz), 139.5, 134.2 (d,  $J_{c-p}$  = 10.2 Hz), 133.0 (d,  $J_{c-p}$  = 3.0 Hz), 132.6 (d,  $J_{c-p}$  = 10.1 Hz), 131.82 (d,  $J_{c-p}$  = 2.8 Hz), 131.76 (d,  $J_{c-p}$  = 125.9 Hz),

131.66 (d,  $J_{c-p} = 123.2$  Hz), 131.62 (d,  $J_{c-p} = 2.9$  Hz), 128.4 (d,  $J_{c-p} = 13.1$  Hz), 127.94 (d,  $J_{c-p} = 13.0$  Hz), 127.88 (d,  $J_{c-p} = 11.1$  Hz), 121.7, 121.1, 44.4 (d,  $J_{c-p} = 3.8$  Hz), 37.9, 35.9, 18.7, 14.6 (d,  $J_{c-p} = 2.9$  Hz).

$^{31}\text{P}$  NMR (162 MHz,  $\text{CDCl}_3$ )  $\delta$  28.29.

HRMS (ESI)  $m/z$ :  $[\text{M}+\text{Na}]^+$  Calcd. for  $\text{C}_{25}\text{H}_{28}\text{N}_3\text{NaO}_2\text{P}$ : 456.1815; found: 456.1817.

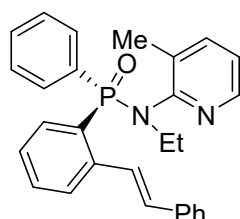

**(*R, E*)-*N*-ethyl-*N*-(3-methylpyridin-2-yl)-*P*-phenyl-*P*-(2-styrylphenyl)phosphinic amide **3w****

A purification by flash chromatography in petroleum ether : ethyl acetate = 1 : 1 gave **3w** as a yellow foam (24.9 mg, 57%). The *ee* value was determined by HPLC analysis on a Chiralcel IA column (hexane/isopropanol = 70/30, flow = 1.0 mL/min) with  $t_r$  = 5.8 min (minor), 6.9 min (major): 93% *ee*.

The absolute stereochemistry was assigned by analogy to compound **3a**.

$^1\text{H}$  NMR (400 MHz,  $\text{CDCl}_3$ )  $\delta$  8.38 – 8.22 (m, 2H), 8.18 (d,  $J = 16.1$  Hz, 1H), 7.77 – 7.63 (m, 3H), 7.48 – 7.42 (m, 3H), 7.39 – 7.18 (m, 8H), 6.92 (dd,  $J = 7.5, 4.7$  Hz, 1H), 6.80 (d,  $J = 16.1$  Hz, 1H), 3.80 – 3.68 (m, 2H), 2.19 (s, 3H), 1.03 (t,  $J = 7.1$  Hz, 3H).

$^{13}\text{C}$  NMR (101 MHz,  $\text{CDCl}_3$ )  $\delta$  154.2 (d,  $J_{c-p} = 3.7$  Hz), 146.6, 142.2 (d,  $J_{c-p} = 9.6$  Hz), 139.4, 137.5, 134.1 (d,  $J_{c-p} = 10.7$  Hz), 133.4 (d,  $J_{c-p} = 2.2$  Hz), 132.50 (d,  $J_{c-p} = 124.5$  Hz), 132.46 (d,  $J_{c-p} = 9.8$  Hz), 131.9 (d,  $J_{c-p} = 2.7$  Hz), 131.5 (d,  $J_{c-p} = 2.9$  Hz), 130.8, 130.1 (d,  $J_{c-p} = 123.7$  Hz), 128.6, 127.9 (d,  $J_{c-p} = 13.2$  Hz), 127.8, 127.7, 127.1, 126.8 (d,  $J_{c-p} = 13.0$  Hz), 126.5 (d,  $J_{c-p} = 11.5$  Hz), 121.7, 44.7 (d,  $J_{c-p} = 4.0$  Hz), 18.8, 14.7 (d,  $J_{c-p} = 3.0$  Hz).

$^{31}\text{P}$  NMR (162 MHz,  $\text{CDCl}_3$ )  $\delta$  29.01.

HRMS (ESI)  $m/z$ :  $[\text{M}+\text{H}]^+$  Calcd. for  $\text{C}_{28}\text{H}_{28}\text{N}_2\text{OP}$ : 439.1933; found: 439.1939.

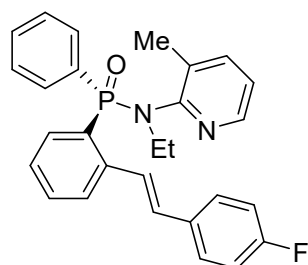

**(*R, E*)-*N*-ethyl-*P*-(2-(4-fluorostyryl)phenyl)-*N*-(3-methylpyridin-2-yl)-*P*-phenylphosphinic amide **3x****

A purification by flash chromatography in petroleum ether : ethyl acetate = 4 : 1 gave **3x** as a yellow foam (21.7 mg, 48%). The *ee* value was determined by HPLC analysis on a Chiralcel AD-H column (hexane/isopropanol = 70/30, flow = 1.0 mL/min) with  $t_r$  = 5.2 min (minor), 6.8 min (major): 92% *ee*.

The absolute stereochemistry was assigned by analogy to compound **3a**.

**<sup>1</sup>H NMR (400 MHz, CDCl<sub>3</sub>)**  $\delta$  8.33 – 8.22 (m, 2H), 8.09 (d,  $J$  = 16.1 Hz, 1H), 7.76 – 7.68 (m, 2H), 7.65 (dd,  $J$  = 7.8, 4.9 Hz, 1H), 7.51 – 7.19 (m, 8H), 6.99 (t,  $J$  = 8.5 Hz, 2H), 6.93 (dd,  $J$  = 7.5, 4.8 Hz, 1H), 6.75 (d,  $J$  = 16.2 Hz, 1H), 3.80 – 3.67 (m, 2H), 2.18 (s, 3H), 1.03 (t,  $J$  = 7.0 Hz, 3H).

**<sup>13</sup>C NMR (101 MHz, CDCl<sub>3</sub>)**  $\delta$  162.5 (d,  $J_{C-F}$  = 248.1 Hz), 154.2 (d,  $J_{C-P}$  = 3.5 Hz), 146.6, 142.1 (d,  $J_{C-P}$  = 9.6 Hz), 139.4, 134.2 (d,  $J_{C-P}$  = 10.6 Hz), 133.8 (d,  $J_{C-P}$  = 3.3 Hz), 133.4 (d,  $J_{C-P}$  = 2.3 Hz), 132.5 (d,  $J_{C-P}$  = 125.1 Hz), 132.4 (d,  $J_{C-P}$  = 10.0 Hz), 131.9 (d,  $J_{C-P}$  = 2.4 Hz), 131.5 (d,  $J_{C-P}$  = 2.8 Hz), 130.1 (d,  $J_{C-P}$  = 123.7 Hz), 129.5, 128.6 (d,  $J_{C-F}$  = 8.0 Hz), 128.0 (d,  $J_{C-P}$  = 12.7 Hz), 127.7 (d,  $J_{C-F}$  = 4.8 Hz), 126.9 (d,  $J_{C-P}$  = 13.1 Hz), 126.4 (d,  $J_{C-P}$  = 11.4 Hz), 121.8, 115.5 (d,  $J_{C-F}$  = 21.6 Hz), 44.7 (d,  $J_{C-P}$  = 4.1 Hz), 18.8, 14.7 (d,  $J_{C-P}$  = 3.1 Hz).

**<sup>31</sup>P NMR (162 MHz, CDCl<sub>3</sub>)**  $\delta$  29.46.

**<sup>19</sup>F NMR (376 MHz, CDCl<sub>3</sub>)**  $\delta$  -114.21.

**HRMS (ESI) m/z:** [M+H]<sup>+</sup> Calcd. for C<sub>28</sub>H<sub>27</sub>FN<sub>2</sub>OP: 457.1839; found: 457.1845.

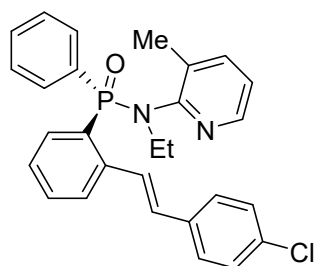

**(*R, E*)-*P*-(2-(4-chlorostyryl)phenyl)-*N*-ethyl-*N*-(3-methylpyridin-2-yl)-*P*-phenylphosphinic amide **3y****

A purification by flash chromatography in petroleum ether : ethyl acetate = 4 : 1 gave **3y** as a yellow foam (25.2 mg, 53%). The *ee* value was determined by HPLC analysis on a Chiralcel IA column (hexane/isopropanol = 70/30, flow = 1.0 mL/min) with  $t_r$  = 6.3 min (minor), 8.7 min (major): 93% *ee*.

The absolute stereochemistry was assigned by analogy to compound **3a**.

**<sup>1</sup>H NMR (400 MHz, CDCl<sub>3</sub>)** δ 8.34 – 8.22 (m, 2H), 8.17 (d, *J* = 16.1 Hz, 1H), 7.76 – 7.61 (m, 3H), 7.45 (t, *J* = 7.6 Hz, 1H), 7.41 – 7.20 (m, 9H), 6.93 (dd, *J* = 7.5, 4.7 Hz, 1H), 6.74 (d, *J* = 16.1 Hz, 1H), 3.79 – 3.67 (m, 2H), 2.18 (s, 3H), 1.03 (t, *J* = 7.0 Hz, 3H).

**<sup>13</sup>C NMR (101 MHz, CDCl<sub>3</sub>)** δ 154.2 (d, *J*<sub>c-p</sub> = 3.7 Hz), 146.7, 141.9 (d, *J*<sub>c-p</sub> = 9.5 Hz), 139.5, 136.1, 134.2 (d, *J*<sub>c-p</sub> = 10.5 Hz), 133.4 (d, *J*<sub>c-p</sub> = 2.3 Hz), 133.3, 132.42 (d, *J*<sub>c-p</sub> = 9.9 Hz), 132.41 (d, *J*<sub>c-p</sub> = 125.0 Hz), 131.9 (d, *J*<sub>c-p</sub> = 2.8 Hz), 131.6 (d, *J*<sub>c-p</sub> = 3.1 Hz), 130.2 (d, *J*<sub>c-p</sub> = 123.7 Hz), 129.4, 128.8, 128.5 (d, *J*<sub>c-p</sub> = 4.6 Hz), 128.3, 128.0 (d, *J*<sub>c-p</sub> = 12.7 Hz), 127.1 (d, *J*<sub>c-p</sub> = 12.8 Hz), 126.5 (d, *J*<sub>c-p</sub> = 11.5 Hz), 121.8, 44.7 (d, *J*<sub>c-p</sub> = 4.0 Hz), 18.8, 14.7 (d, *J*<sub>c-p</sub> = 3.1 Hz).

**<sup>31</sup>P NMR (162 MHz, CDCl<sub>3</sub>)** δ 29.40.

**HRMS (ESI) m/z:** [M+H]<sup>+</sup> Calcd. for C<sub>28</sub>H<sub>27</sub>ClN<sub>2</sub>OP: 473.1549; found: 473.1550.

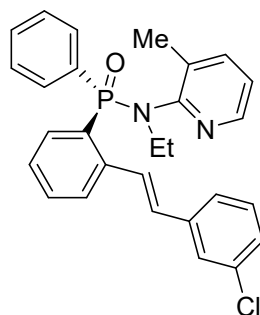

**(*R, E*)-*P*-(2-(3-chlorostyryl)phenyl)-*N*-ethyl-*N*-(3-methylpyridin-2-yl)-*P*-phenylphosphinic amide **3z****

A purification by flash chromatography in petroleum ether : ethyl acetate = 4 : 1 gave **3z** as a yellow foam (26.2 mg, 55%). The *ee* value was determined by HPLC analysis on a Chiralcel AD-H column (hexane/isopropanol = 70/30, flow = 1.0 mL/min) with *t*<sub>r</sub> = 4.8 min (minor), 5.6 min (major): 94% *ee*.

The absolute stereochemistry was assigned by analogy to compound **3a**.

**<sup>1</sup>H NMR (400 MHz, CDCl<sub>3</sub>)** δ 8.38 – 8.24 (m, 2H), 8.14 (d, *J* = 16.1 Hz, 1H), 7.76 – 7.67 (m, 2H), 7.64 (dd, *J* = 7.8, 4.9 Hz, 1H), 7.46 (t, *J* = 7.6 Hz, 1H), 7.42 – 7.15 (m, 9H), 6.94 (dd, *J* = 7.6, 4.7 Hz, 1H), 6.71 (d, *J* = 16.2 Hz, 1H), 3.80 – 3.68 (m, 2H), 2.18 (s, 3H), 1.03 (t, *J* = 7.1 Hz, 3H).

**<sup>13</sup>C NMR (101 MHz, CDCl<sub>3</sub>)** δ 154.1 (d, *J*<sub>c-p</sub> = 3.8 Hz), 146.7, 141.7 (d, *J*<sub>c-p</sub> = 9.0 Hz), 139.5 (d, *J*<sub>c-p</sub> = 3.6 Hz), 134.5, 134.2 (d, *J*<sub>c-p</sub> = 10.6 Hz), 133.4 (d, *J*<sub>c-p</sub> = 2.5 Hz), 132.43 (d, *J*<sub>c-p</sub> = 125.2 Hz), 132.41 (d, *J*<sub>c-p</sub> = 10.2 Hz), 132.0 (d, *J*<sub>c-p</sub> = 2.8 Hz), 131.6 (d, *J*<sub>c-p</sub> = 2.9 Hz), 130.5 (d, *J*<sub>c-p</sub> = 123.7 Hz), 129.8, 129.41, 129.36 (d, *J*<sub>c-p</sub> = 4.9 Hz),



128.0 (d,  $J_{\text{C-P}} = 12.6$  Hz), 127.6, 127.3 (d,  $J_{\text{C-P}} = 13.0$  Hz), 127.0, 126.6 (d,  $J_{\text{C-P}} = 11.5$  Hz), 125.2, 121.8, 44.7 (d,  $J_{\text{C-P}} = 4.3$  Hz), 18.8, 14.7 (d,  $J_{\text{C-P}} = 3.4$  Hz).

$^{31}\text{P}$  NMR (162 MHz,  $\text{CDCl}_3$ )  $\delta$  28.98.

HRMS (ESI)  $m/z$ :  $[\text{M}+\text{H}]^+$  Calcd. for  $\text{C}_{28}\text{H}_{27}\text{ClN}_2\text{OP}$ : 473.1549; found: 473.1550.

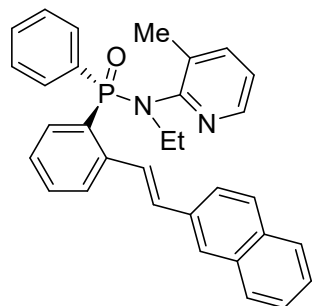

**(*R, E*)-*N*-ethyl-*N*-(3-methylpyridin-2-yl)-*P*-(2-(2-(naphthalen-2-yl)vinyl)phenyl)-*P*-phenylphosphinic amide **3aa****

A purification by flash chromatography in petroleum ether : ethyl acetate = 4 : 1 gave **3aa** as a yellow foam (25.2 mg, 52%). The *ee* value was determined by HPLC analysis on a Chiralcel AD-H column (hexane/isopropanol = 70/30, flow = 1.0 mL/min) with  $t_r = 5.9$  min (major), 8.5 min (minor): 94% *ee*.

The absolute stereochemistry was assigned by analogy to compound **3a**.

$^1\text{H}$  NMR (400 MHz,  $\text{CDCl}_3$ )  $\delta$  8.36 – 8.21 (m, 3H), 7.83 – 7.69 (m, 8H), 7.51 – 7.21 (m, 8H), 7.00 – 6.89 (m, 2H), 3.82 – 2.71 (m, 2H), 2.19 (s, 3H), 1.04 (t,  $J = 7.0$  Hz, 3H).

$^{13}\text{C}$  NMR (101 MHz,  $\text{CDCl}_3$ ) 154.2 (d,  $J_{\text{C-P}} = 3.7$  Hz), 146.7, 142.2 (d,  $J_{\text{C-P}} = 9.6$  Hz), 139.4, 135.2, 134.2 (d,  $J_{\text{C-P}} = 10.4$  Hz), 133.7, 133.4 (d,  $J_{\text{C-P}} = 2.2$  Hz), 133.2, 132.6 (d,  $J_{\text{C-P}} = 125.9$  Hz), 132.5 (d,  $J_{\text{C-P}} = 9.8$  Hz), 132.0 (d,  $J_{\text{C-P}} = 2.4$  Hz), 131.5 (d,  $J_{\text{C-P}} = 2.5$  Hz), 130.9, 130.2 (d,  $J_{\text{C-P}} = 123.7$  Hz), 128.3, 128.2, 128.0 (d,  $J_{\text{C-P}} = 12.8$  Hz), 127.8, 127.2, 126.9 (d,  $J_{\text{C-P}} = 13.0$  Hz), 126.5 (d,  $J_{\text{C-P}} = 11.4$  Hz), 126.3, 126.0, 124.3, 121.8, 44.7 (d,  $J_{\text{C-P}} = 4.1$  Hz), 18.8, 14.7 (d,  $J_{\text{C-P}} = 3.2$  Hz).

$^{31}\text{P}$  NMR (162 MHz,  $\text{CDCl}_3$ )  $\delta$  29.17.

HRMS (ESI)  $m/z$ :  $[\text{M}+\text{H}]^+$  Calcd. for  $\text{C}_{32}\text{H}_{30}\text{N}_2\text{OP}$ : 489.2094; found: 489.2096.

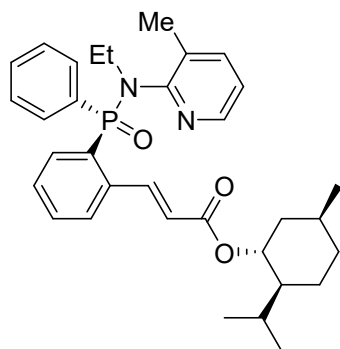

**(1*R*, 2*S*, 5*S*)-2-isopropyl-5-methylcyclohexyl-(*E*)-3-(2-((*R*)-(ethyl (3-methylpyridin-2-yl)amino)(phenyl)phosphoryl)phenyl)acrylate **3ab****

A purification by flash chromatography in petroleum ether : ethyl acetate = 4 : 1 gave **3ab** as a yellow foam (35.6 mg, 65%). The *ee* value was determined by HPLC analysis on a Chiralcel AD-H column (hexane/isopropanol = 90/10, flow = 0.8 mL/min) with  $t_r$  = 10.2 min (minor), 17.1 min (major): 95% *ee*.

The absolute stereochemistry was assigned by analogy to compound **3a**.

**<sup>1</sup>H NMR (400 MHz, CDCl<sub>3</sub>)**  $\delta$  8.51 – 8.38 (m, 2H), 8.25 (dd,  $J$  = 4.8, 1.9 Hz, 1H), 7.71 – 7.62 (m, 2H), 7.54 – 7.40 (m, 3H), 7.37 – 7.30 (m, 1H), 7.30 – 7.18 (m, 3H), 6.93 (dd,  $J$  = 7.5, 4.7 Hz, 1H), 6.04 (d,  $J$  = 15.7 Hz, 1H), 4.74 (td,  $J$  = 10.9, 4.3 Hz, 1H), 3.80 – 3.69 (m, 2H), 2.18 (s, 3H), 2.04 – 1.82 (m, 2H), 1.73 – 1.63 (m, 2H), 1.57 – 1.35 (m, 2H), 1.09 – 0.96 (m, 5H), 0.94 – 0.85 (m, 7H), 0.75 (d,  $J$  = 6.9 Hz, 3H).

**<sup>13</sup>C NMR (101 MHz, CDCl<sub>3</sub>)**  $\delta$  166.0, 154.0 (d,  $J_{c-p}$  = 3.7 Hz), 146.6, 143.4 (d,  $J_{c-p}$  = 4.8 Hz), 139.5, 139.3 (d,  $J_{c-p}$  = 9.5 Hz), 134.1 (d,  $J_{c-p}$  = 10.2 Hz), 133.1, 132.6 (d,  $J_{c-p}$  = 10.2 Hz), 132.5 (d,  $J_{c-p}$  = 125.0 Hz), 132.1 (d,  $J_{c-p}$  = 125.2 Hz), 131.8 (d,  $J_{c-p}$  = 2.7 Hz), 131.6 (d,  $J_{c-p}$  = 3.2 Hz), 128.9 (d,  $J_{c-p}$  = 13.0 Hz), 127.9 (d,  $J_{c-p}$  = 13.1 Hz), 127.7 (d,  $J_{c-p}$  = 11.0 Hz), 121.8, 121.2, 74.2, 47.1, 44.4 (d,  $J_{c-p}$  = 4.0 Hz), 41.0, 34.4, 31.5, 26.2, 23.5, 22.2, 20.9, 18.6, 16.5, 14.7 (d,  $J_{c-p}$  = 2.8 Hz).

**<sup>31</sup>P NMR (162 MHz, CDCl<sub>3</sub>)**  $\delta$  28.01.

**HRMS (ESI) m/z:** [M+Na]<sup>+</sup> Calcd. for C<sub>33</sub>H<sub>41</sub>N<sub>2</sub>NaO<sub>3</sub>P: 567.2752; found: 567.2752.

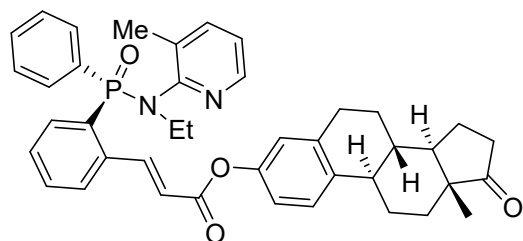

**(8*S*, 9*R*, 13*R*, 14*R*)-13-methyl-17-oxo-7,8,9,11,12,13,14,15,16,17-decahydro-**

**6H-cyclopenta[a]phenanthren-3-yl (E)-3-(2-((R)-(ethyl(3-methylpyridin-2-yl)amino)(phenyl)phosphoryl)phenyl)acrylate 3ac**

A purification by flash chromatography in petroleum ether : ethyl acetate : dichloromethane = 2 : 2 : 1 gave **3ac** as a yellow foam (45.4 mg, 69%). The *ee* value was determined by HPLC analysis on a Chiralcel IA column (hexane/isopropanol = 80/20, flow = 1.0 mL/min) with  $t_r$  = 34.1 min (minor), 49.7 min (major): 95% *ee*.

The absolute stereochemistry was assigned by analogy to compound **3a**.

**<sup>1</sup>H NMR (400 MHz, CDCl<sub>3</sub>)**  $\delta$  8.72 (d,  $J$  = 15.8 Hz, 1H), 8.51 – 8.40 (m, 1H), 8.27 (dd,  $J$  = 4.8, 1.9 Hz, 1H), 7.75 – 7.65 (m, 2H), 7.63 – 7.57 (m, 1H), 7.55 – 7.45 (m, 2H), 7.35 (td,  $J$  = 7.5, 1.5 Hz, 1H), 7.32 – 7.20 (m, 4H), 6.97 – 6.84 (m, 3H), 6.26 (d,  $J$  = 15.8 Hz, 1H), 3.82 – 3.68 (m, 2H), 2.97 – 2.87 (m, 2H), 2.51 (dd,  $J$  = 18.8, 8.5 Hz, 1H), 2.45 – 2.25 (m, 2H), 2.22 – 1.91 (m, 7H), 1.70 – 1.39 (m, 6H), 1.05 (t,  $J$  = 7.1 Hz, 3H), 0.91 (s, 3H).

**<sup>13</sup>C NMR (101 MHz, CDCl<sub>3</sub>)**  $\delta$  165.2, 153.9 (d,  $J_{c-p}$  = 3.7 Hz), 148.8, 146.6, 145.4 (d,  $J_{c-p}$  = 4.5 Hz), 139.5, 138.8 (d,  $J_{c-p}$  = 8.9 Hz), 138.0, 137.2, 134.2 (d,  $J_{c-p}$  = 9.9 Hz), 133.1 (d,  $J_{c-p}$  = 2.9 Hz), 132.8 (d,  $J_{c-p}$  = 122.2 Hz), 132.6 (d,  $J_{c-p}$  = 9.8 Hz), 132.0 (d,  $J_{c-p}$  = 2.9 Hz), 131.8 (d,  $J_{c-p}$  = 125.6 Hz), 131.7 (d,  $J_{c-p}$  = 2.9 Hz), 129.4 (d,  $J_{c-p}$  = 12.8 Hz), 128.0 (d,  $J_{c-p}$  = 12.6 Hz), 127.8 (d,  $J_{c-p}$  = 11.0 Hz), 126.4, 121.9, 121.8, 119.7, 118.9, 50.5, 48.1, 44.5 (d,  $J_{c-p}$  = 4.2 Hz), 44.2, 38.1, 36.0, 31.6, 29.5, 26.4, 25.8, 21.7, 18.6, 14.7 (d,  $J_{c-p}$  = 2.8 Hz), 13.9.

**<sup>31</sup>P NMR (162 MHz, CDCl<sub>3</sub>)**  $\delta$  27.64.

**HRMS (ESI) m/z:** [M+Na]<sup>+</sup> Calcd. for C<sub>41</sub>H<sub>43</sub>N<sub>2</sub>NaO<sub>4</sub>P: 681.2860; found: 681.2858.

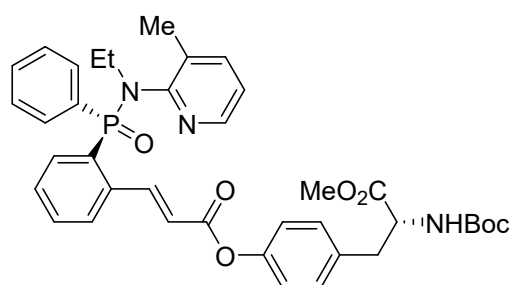

**4-((R)-2-((tert-butoxycarbonyl)amino)-3-methoxy-3-oxopropyl)phenyl (E)-3-(2-((R)-(ethyl(3-methylpyridin-2-yl)amino)(phenyl)phosphoryl)phenyl)acrylate 3ad**

A purification by flash chromatography in petroleum ether : ethyl acetate = 1 : 1 gave **3ad** as a yellow foam (36.8 mg, 54%). The *ee* value was determined by HPLC analysis on a Chiralcel IA column (hexane/isopropanol = 70/30, flow = 1.0 mL/min) with  $t_r$  = 10.0 min (minor), 14.3 min (major): 95% *ee*.

The absolute stereochemistry was assigned by analogy to compound **3a**.

**<sup>1</sup>H NMR (400 MHz, CDCl<sub>3</sub>)** δ 8.76 (d, *J* = 15.8 Hz, 1H), 8.50 – 8.41 (m, 1H), 8.27 (dd, *J* = 4.8, 1.9 Hz, 1H), 7.74 – 7.65 (m, 2H), 7.62 – 7.58 (m, 1H), 7.55 – 7.46 (m, 2H), 7.35 (td, *J* = 7.4, 1.5 Hz, 1H), 7.31 – 7.21 (m, 3H), 7.17 – 7.11 (m, 2H), 7.09 – 7.03 (m, 2H), 6.94 (dd, *J* = 7.5, 4.7 Hz, 1H), 6.25 (d, *J* = 15.8 Hz, 1H), 5.01 (d, *J* = 8.2 Hz, 1H), 4.63 – 4.53 (m, 1H), 3.81 – 3.68 (m, 5H), 3.17 – 3.01 (m, 2H), 2.18 (s, 3H), 1.43 (s, 9H), 1.05 (t, *J* = 7.1 Hz, 3H).

**<sup>13</sup>C NMR (101 MHz, CDCl<sub>3</sub>)** 172.4, 164.8, 155.24, 153.9 (d, *J*<sub>c-p</sub> = 3.7 Hz), 150.0, 146.7, 145.6 (d, *J*<sub>c-p</sub> = 4.5 Hz), 139.5, 138.8 (d, *J*<sub>c-p</sub> = 9.3 Hz), 134.3 (d, *J*<sub>c-p</sub> = 9.9 Hz), 133.5, 133.1 (d, *J*<sub>c-p</sub> = 3.0 Hz), 132.9 (d, *J*<sub>c-p</sub> = 122.5 Hz), 132.6 (d, *J*<sub>c-p</sub> = 10.1 Hz), 132.0 (d, *J*<sub>c-p</sub> = 2.2 Hz), 131.9 (d, *J*<sub>c-p</sub> = 126.1 Hz), 131.7 (d, *J*<sub>c-p</sub> = 2.6 Hz), 130.3, 129.5 (d, *J*<sub>c-p</sub> = 12.7 Hz), 128.0 (d, *J*<sub>c-p</sub> = 12.8 Hz), 127.8 (d, *J*<sub>c-p</sub> = 11.0 Hz), 121.9, 121.8, 119.6, 80.1, 54.5, 53.5, 52.4, 44.6 (d, *J*<sub>c-p</sub> = 4.1 Hz), 37.8, 28.4, 18.6, 14.7 (d, *J*<sub>c-p</sub> = 2.8 Hz).

**<sup>31</sup>P NMR (162 MHz, CDCl<sub>3</sub>)** δ 27.60.

**HRMS (ESI) m/z:** [M+Na]<sup>+</sup> Calcd. for C<sub>38</sub>H<sub>42</sub>N<sub>3</sub>NaO<sub>7</sub>P: 706.2655; found: 706.2658.

## 2.3 General Procedure for Pd(II)-Catalyzed C–H Olefination via Kinetic Resolution (KR)

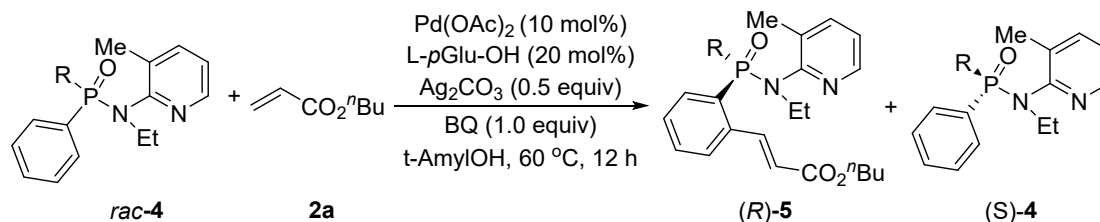

To a 50 mL Schlenk tube was added substrate **1** (0.20 mmol), **2a** (0.40 mmol),  $\text{Pd}(\text{OAc})_2$  (4.4 mg, 0.01 mmol), *L-pGlu-OH* (5.2 mg, 0.04 mmol),  $\text{Ag}_2\text{CO}_3$  (27.6 mg, 0.1 mmol), BQ (21.6 mg, 0.20 mmol), *t*-AmylOH (2 mL). The mixture was stirred for 12 h at 60 °C under air. The resulting mixture was filtered through a celite pad and concentrated in vacuo. The residue was purified by preparative TLC using PE/EA as the eluent to afford the alkylation product **5** and unreacted **4**.

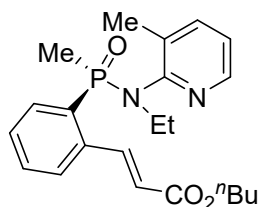

### butyl (*R, E*)-3-(2-((ethyl(3-methylpyridin-2-yl)amino)(methyl)phosphoryl)phenyl)acrylate (*R*)-5a

A purification by preparative TLC in ethyl acetate : dichloromethane = 3 : 1 gave (*R*)-**5a** as a yellow foam (20.7 mg, 26%). The *ee* value was determined by HPLC analysis on a Chiralcel IA column (hexane/isopropanol=70/30, flow=1.0 mL/min) with  $t_r$  = 7.1 min (minor), 8.3 min (major): 71% *ee*.

The absolute stereochemistry was assigned by analogy to compound **3a**.

**$^1\text{H}$  NMR (400 MHz,  $\text{CDCl}_3$ )**  $\delta$  8.79 (d,  $J$  = 15.8 Hz, 1H), 8.34 (dd,  $J$  = 4.7, 1.9 Hz, 1H), 8.25 – 8.15 (m, 1H), 7.64 – 7.61 (m, 1H), 7.56 – 7.44 (m, 3H), 7.07 (dd,  $J$  = 7.5, 4.7 Hz, 1H), 6.31 (d,  $J$  = 15.8 Hz, 1H), 4.24 – 4.14 (m, 2H), 3.50 – 3.40 (m, 2H), 2.44 (s, 3H), 1.70 – 1.58 (m, 5H), 1.44 – 1.36 (m, 2H), 0.99 – 0.92 (m, 6H).

**$^{13}\text{C}$  NMR (101 MHz,  $\text{CDCl}_3$ )**  $\delta$  166.7, 154.2 (d,  $J_{\text{C-p}}$  = 2.6 Hz), 146.9, 143.6 (d,  $J_{\text{C-p}}$  = 4.4 Hz), 140.1, 138.3 (d,  $J_{\text{C-p}}$  = 8.2 Hz), 134.3 (d,  $J_{\text{C-p}}$  = 10.2 Hz), 132.4 (d,  $J_{\text{C-p}}$  =

119.9 Hz), 132.2 (d,  $J_{c-p}$  = 3.1 Hz), 132.0 (d,  $J_{c-p}$  = 2.8 Hz), 129.3 (d,  $J_{c-p}$  = 12.6 Hz), 127.7 (d,  $J_{c-p}$  = 12.6 Hz), 122.0, 121.6, 64.6, 43.3 (d,  $J_{c-p}$  = 4.0 Hz), 30.8, 19.2, 18.5, 16.8 (d,  $J_{c-p}$  = 92.2 Hz), 14.6 (d,  $J_{c-p}$  = 2.9 Hz), 13.9.

$^{31}\text{P}$  NMR (162 MHz,  $\text{CDCl}_3$ )  $\delta$  32.53.

HRMS (ESI)  $m/z$ :  $[\text{M}+\text{Na}]^+$  Calcd. for  $\text{C}_{22}\text{H}_{29}\text{N}_2\text{NaO}_3\text{P}$ : 423.1812; found: 423.1813.

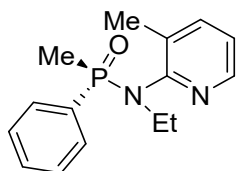

**(S)-N-ethyl-P-methyl-N-(3-methylpyridin-2-yl)-P-phenylphosphinic amide (S)-4a**

A purification by preparative TLC in ethyl acetate : dichloromethane = 3 : 1 gave (S)-4a as a yellow foam (23.8 mg, 43%). The *ee* value was determined by HPLC analysis on a Chiralcel OD-H column (hexane/isopropanol=90/10, flow=0.8 mL/min) with  $t_r$  =13.0 min (minor), 14.8 min (major): 99% *ee*.

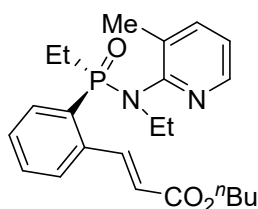

**butyl (R, E)-3-(2-(ethyl(ethyl(3-methylpyridin-2-yl)amino)phosphoryl)phenyl)acrylate (R)-5b**

A purification by preparative TLC in ethyl acetate : dichloromethane = 3 : 1 gave (R)-5b as a yellow foam (31.4 mg, 38%). The *ee* value was determined by HPLC analysis on a Chiralcel IA column (hexane/isopropanol=90/10, flow=1.0 mL/min) with  $t_r$  =11.4 min (minor), 14.7 min (major): 90% *ee*.

The absolute stereochemistry was assigned by analogy to compound 3a.

$^1\text{H}$  NMR (400 MHz,  $\text{CDCl}_3$ )  $\delta$  8.86 (d,  $J$  = 15.8 Hz, 1H), 8.36 (d,  $J$  = 4.6 Hz, 1H), 8.26 – 8.17 (m, 1H), 7.65 – 7.62 (m, 1H), 7.56 – 7.43 (m, 3H), 7.08 (dd,  $J$  = 7.5, 4.7 Hz, 1H), 6.30 (d,  $J$  = 15.8 Hz, 1H), 4.21– 4.17 (m, 2H), 3.53– 3.35 (m, 2H), 2.43 (s, 3H), 1.93 – 1.74 (m, 2H), 1.71 – 1.63 (m, 2H), 1.41 (q,  $J$  = 7.5 Hz, 2H), 0.98 – 0.87 (m, 9H).

$^{13}\text{C}$  NMR (101 MHz,  $\text{CDCl}_3$ )  $\delta$  166.4, 154.0 (d,  $J_{c-p}$  = 3.0 Hz), 146.6, 143.5 (d,  $J_{c-p}$  = 3.7 Hz), 139.8, 138.8 (d,  $J_{c-p}$  = 8.3 Hz), 134.5 (d,  $J_{c-p}$  = 9.7 Hz), 132.2 (d,  $J_{c-p}$  = 3.4 Hz), 131.6 (d,  $J_{c-p}$  = 2.6 Hz), 130.6 (d,  $J_{c-p}$  = 115.0 Hz), 128.9 (d,  $J_{c-p}$  = 12.4

Hz), 127.3 (d,  $J_{c-p}$  = 10.4 Hz), 121.8, 121.1, 64.2, 43.3 (d,  $J_{c-p}$  = 3.3 Hz), 30.6, 22.8, 21.9, 19.0, 18.2, 14.2 (d,  $J_{c-p}$  = 2.8 Hz), 13.5.

$^{31}\text{P}$  NMR (162 MHz,  $\text{CDCl}_3$ )  $\delta$  37.57.

HRMS (ESI)  $m/z$ :  $[\text{M}+\text{Na}]^+$  Calcd. for  $\text{C}_{23}\text{H}_{31}\text{N}_2\text{NaO}_3\text{P}$ : 437.1964; found: 437.1970.

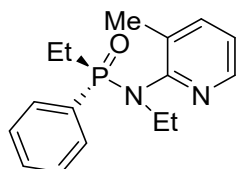

**(S)-N, P-diethyl-N-(3-methylpyridin-2-yl)-P-phenylphosphinic amide (S)-4b**

A purification by preparative TLC in ethyl acetate : dichloromethane = 3 : 1 gave (S)-**4b** as a yellow foam (33.1 mg, 57%). The *ee* value was determined by HPLC analysis on a Chiralcel OD-H column (hexane/isopropanol=95/5, flow=0.6 mL/min) with  $t_r$  = 18.3 min (major), 20.5 min (minor): 79% *ee*.

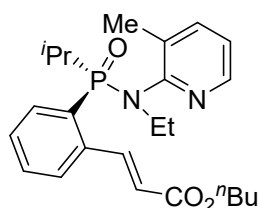

**butyl (R, E)-3-(2-((ethyl(3-methylpyridin-2-yl)amino)(isopropyl)phosphoryl)phenyl)acrylate (R)-5c**

A purification by preparative TLC in ethyl acetate : dichloromethane = 4 : 1 gave (R)-**5c** as a yellow foam (32.1 mg, 38%). The *ee* value was determined by HPLC analysis on a Chiralcel IA column (hexane/isopropanol=90/10, flow=0.8 mL/min) with  $t_r$  = 12.5 min (minor), 15.6 min (major): 84% *ee*.

The absolute stereochemistry was assigned by analogy to compound **3a**.

$^1\text{H}$  NMR (400 MHz,  $\text{CDCl}_3$ )  $\delta$  8.96 (d,  $J$  = 15.9 Hz, 1H), 8.31 (dd,  $J$  = 4.8, 1.9 Hz, 1H), 8.09 (ddd,  $J$  = 12.6, 7.6, 1.5 Hz, 1H), 7.64 – 7.61 (m, 1H), 7.50 – 7.37 (m, 3H), 7.06 (dd,  $J$  = 7.5, 4.7 Hz, 1H), 6.25 (d,  $J$  = 15.9 Hz, 1H), 4.19 (t,  $J$  = 6.7 Hz, 2H), 3.60 – 3.43 (m, 2H), 2.44 – 2.38 (m, 1H), 2.31 (s, 3H), 1.67 (dq,  $J$  = 8.8, 6.9 Hz, 2H), 1.48 – 1.36 (m, 2H), 1.06 (dd,  $J$  = 16.2, 7.0 Hz, 3H), 0.94 (t,  $J$  = 7.4 Hz, 3H), 0.86 (t,  $J$  = 7.1 Hz, 3H), 0.80 (dd,  $J$  = 18.2, 7.2 Hz, 3H).

$^{13}\text{C}$  NMR (101 MHz,  $\text{CDCl}_3$ )  $\delta$  166.6, 153.7 (d,  $J_{c-p}$  = 2.9 Hz), 146.3, 144.1 (d,  $J_{c-p}$  = 3.2 Hz), 139.7 (d,  $J_{c-p}$  = 7.9 Hz), 139.6, 134.0 (d,  $J_{c-p}$  = 10.0 Hz), 132.4 (d,  $J_{c-p}$  = 3.1 Hz), 131.3 (d,  $J_{c-p}$  = 2.8 Hz), 130.2 (d,  $J_{c-p}$  = 110.2 Hz), 128.5 (d,  $J_{c-p}$  = 11.9

Hz), 127.3 (d,  $J_{c-p} = 10.3$  Hz), 121.8, 120.5, 64.2, 42.9 (d,  $J_{c-p} = 2.9$  Hz), 30.5, 26.8 (d,  $J_{c-p} = 89.1$  Hz), 18.9, 18.0, 16.4, 15.0 (d,  $J_{c-p} = 3.7$  Hz), 13.9 (d,  $J_{c-p} = 3.0$  Hz), 13.6.

**$^{31}\text{P}$  NMR (162 MHz,  $\text{CDCl}_3$ )**  $\delta$  43.22.

**HRMS (ESI) m/z:**[M+Na] $^+$  Calcd. for  $\text{C}_{24}\text{H}_{33}\text{N}_2\text{NaO}_3\text{P}$ :451.2125; found:451.2126.

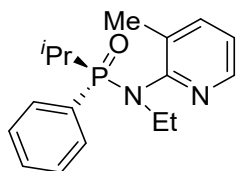

**(S)-N-ethyl-P-isopropyl-N-(3-methylpyridin-2-yl)-P-phenylphosphinic amide (S)-4c**

A purification by preparative TLC in ethyl acetate : dichloromethane = 4 : 1 gave (S)-4c as a yellow foam (18.3 mg, 30%). The *ee* value was determined by HPLC analysis on a Chiralcel IA column (hexane/isopropanol=92/8, flow=0.6 mL/min) with  $t_r$  =17.3 min (major), 20.9 min (minor): 84% *ee*.

**$^1\text{H}$  NMR (400 MHz,  $\text{CDCl}_3$ )**  $\delta$  8.45 (d,  $J=15.9$  Hz, 1H), 8.25 (dd,  $J=4.8, 1.9$  Hz, 1H), 8.21 – 8.10 (m, 1H), 7.67 – 7.57 (m, 1H), 7.52 – 7.39 (m, 3H), 7.02 (dd,  $J=7.6, 4.7$  Hz, 1H), 6.25 (d,  $J=15.9$  Hz, 1H), 5.13 – 4.83 (m, 1H), 4.23 – 4.08 (m, 2H), 3.59 – 3.47 (m, 2H), 2.37 (s, 3H), 1.62 (dt,  $J=8.5, 6.9$  Hz, 2H), 1.39 (dt,  $J=10.5, 7.0$  Hz, 8H), 0.95 (dt,  $J=13.1, 7.2$  Hz, 7H).

**$^{13}\text{C}$  NMR (101 MHz,  $\text{CDCl}_3$ )**  $\delta$  166.7, 153.6 (d,  $J_{c-p} = 2.6$  Hz), 146.5, 144.0 (d,  $J_{c-p} = 4.4$  Hz), 139.6, 138.3 (d,  $J_{c-p} = 9.2$  Hz), 133.8 (d,  $J_{c-p} = 9.5$  Hz), 133.2 (d,  $J_{c-p} = 3.0$  Hz), 131.9 (d,  $J_{c-p} = 2.9$  Hz), 130.8 (d,  $J_{c-p} = 169.5$  Hz), 129.0 (d,  $J_{c-p} = 14.0$  Hz), 127.5 (d,  $J_{c-p} = 12.9$  Hz), 121.8, 120.7, 71.0 (d,  $J_{c-p} = 6.4$  Hz), 64.5, 43.6 (d,  $J_{c-p} = 4.4$  Hz), 30.8, 24.3 (d,  $J_{c-p} = 3.2$  Hz), 24.1 (d,  $J_{c-p} = 5.5$  Hz), 19.2, 18.8, 14.1 (d,  $J_{c-p} = 5.1$  Hz), 13.9.

**$^{31}\text{P}$  NMR (162 MHz,  $\text{CDCl}_3$ )**  $\delta$  18.31.

**HRMS (ESI) m/z:**[M+Na] $^+$  Calcd. for  $\text{C}_{24}\text{H}_{33}\text{N}_2\text{NaO}_4\text{P}$ :467.2074; found:467.2076.



## 2.4 Gram-Scale

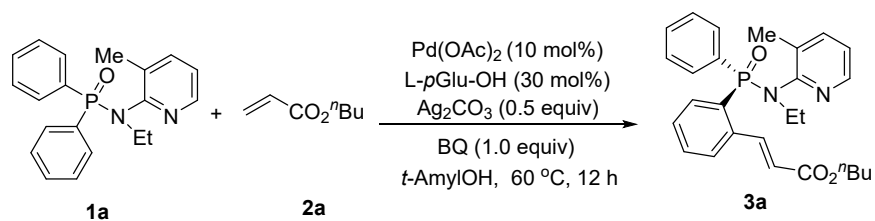

To a 250 mL Schlenk tube was added substrate **1a** (1008.0 mg, 3.0 mmol), **2a** (0.9 mL, 6.0 mmol), Pd(OAc)<sub>2</sub> (66.0 mg, 0.3 mmol), L-*p*Glu-OH (116.2 mg, 0.9 mmol), Ag<sub>2</sub>CO<sub>3</sub> (828.0 mg, 1.5 mmol), BQ (324.0 mg, 3.0 mmol), *t*-AmylOH (30 mL). The mixture was stirred for 12 h at 60 °C under Air. Then the mixture was diluted with ethyl acetate, filtrated through celite. After concentration, the resulting residue was purified by flash chromatography in petroleum ether: ethyl acetate = 2: 1 to give **3a** as yellow soild (920.8 mg, 66%, 90% *ee*).

### 3. Mechanistic Studies

#### 3.1 H/D exchange studies

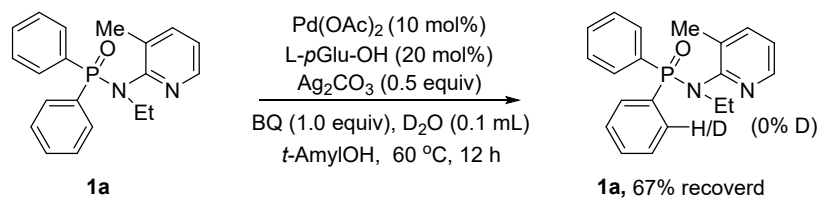

To a 50 mL Schlenk tube was added **1a** (0.1 mmol), Pd(OAc)<sub>2</sub> (0.01 mmol), L-*p*Glu-OH (0.02 mmol), Ag<sub>2</sub>CO<sub>3</sub> (0.05 mmol), BQ (0.10 mmol), *t*-AmylOH (1 mL). The mixture was stirred for 12 h at 60 °C under air. Then the mixture was diluted with ethyl acetate, filtrated through celite. After concentration, the resulting residue was purified by preparative TLC using hexane/EtOAc = 1:1 as the eluent, **1a** was recovered in 67% yield.

czj-1-1118-117-2. 1. 1. 1r

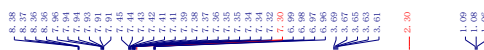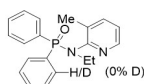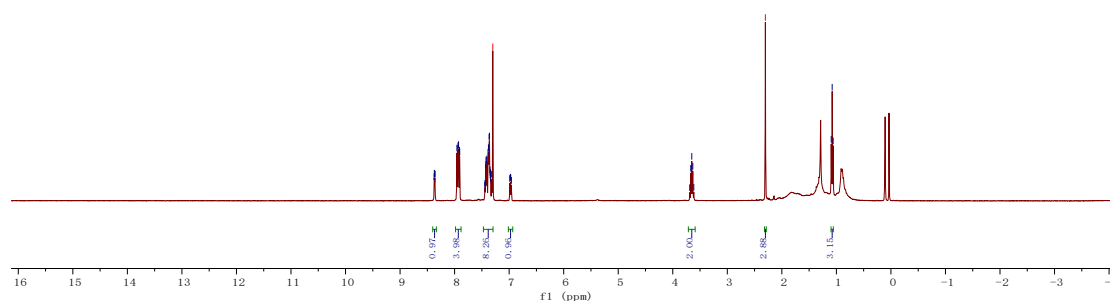

### 3.2 Kinetic isotopic effect experiment

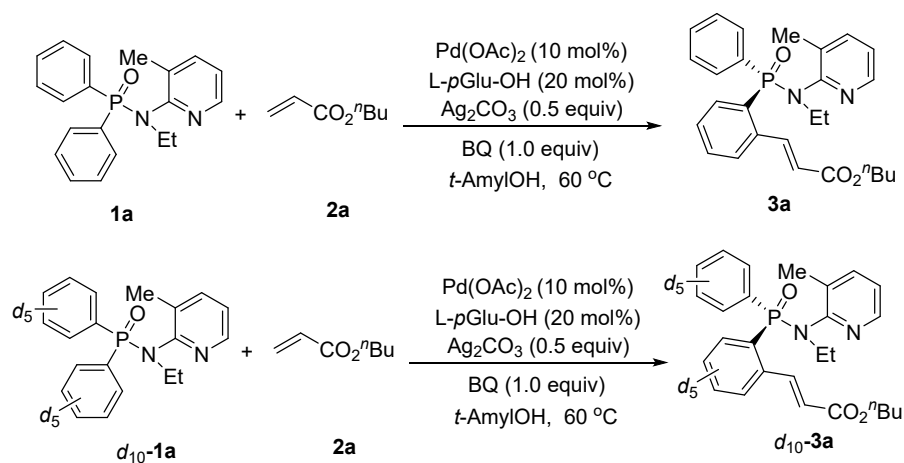

To a 50 mL Schlenk tube was added **1a** (0.1 mmol), Pd(OAc)<sub>2</sub> (0.01 mmol), L-pGlu-OH (0.02 mmol), Ag<sub>2</sub>CO<sub>3</sub> (0.05 mmol), BQ (0.10 mmol), *t*-AmylOH (1 mL). The mixture was stirred at 60 °C under air. After cooling to room temperature, the mixture was diluted with ethyl acetate, filtrated through celite. After concentration, the yield was determined by <sup>1</sup>H NMR yield using 1,3,5-trimethoxybenzene as internal standard.

**Table S2. Yield of **3a** and **d<sub>10</sub>-3a** reaction**

| experiment of <b>3a</b> |                        | experiment of <b>d<sub>10</sub>-3a</b> |                                       |
|-------------------------|------------------------|----------------------------------------|---------------------------------------|
| time(s)                 | yield of <b>3a</b> (%) | time(s)                                | yield of <b>d<sub>10</sub>-3a</b> (%) |
| 1800                    | 3                      | 1800                                   | 2.5                                   |
| 3600                    | 5.5                    | 3600                                   | 3.5                                   |
| 5400                    | 9                      | 7200                                   | 6.5                                   |
| 7200                    | 12                     | 9000                                   | 7                                     |
| 9000                    | 13.5                   | 10800                                  | 8                                     |

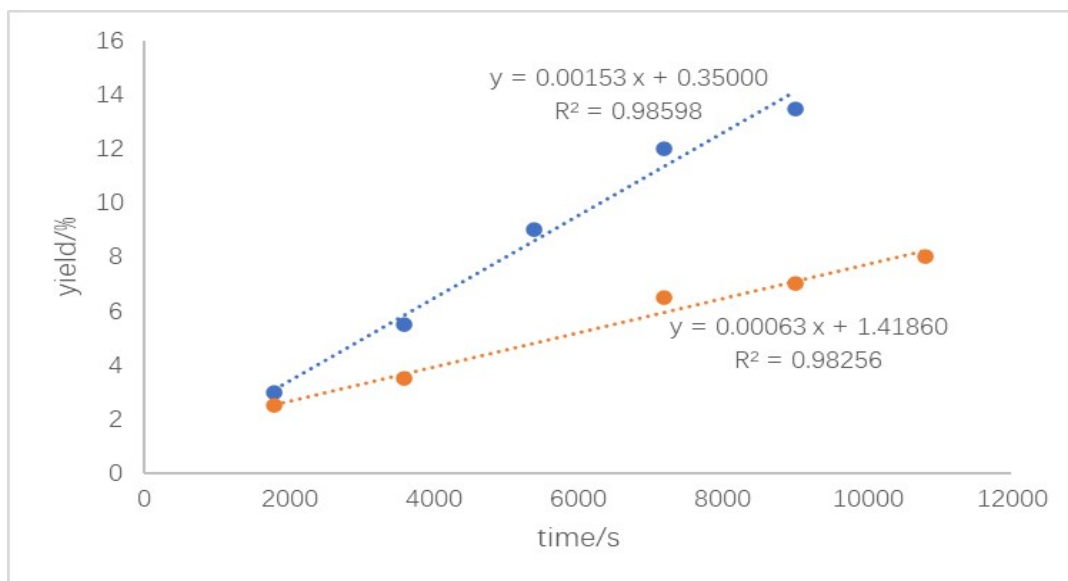

**Figure S1. Kinetic profile of the reaction**

## 4 Computational Details

All density functional theory (DFT) calculations were carried out using Gaussian16 software package<sup>1</sup>. All geometry optimizations were performed with B3LYP<sup>2-3</sup>-D3 (Becke–Johnson damping function)<sup>4</sup> functional using LANL2DZ<sup>5</sup> basis set for palladium and 6-31G(d) basis set for the other atoms. The vibrational frequencies were computed at the same level of theory as for the geometry optimizations, and to evaluate the zero-point vibrational energy (ZPVE) and thermal corrections at 298 K. The single-point energies were computed based on the gas-phase optimized structures, using M06L<sup>6</sup> functional, and SDD<sup>7-8</sup> basis set for palladium and 6-311+G(d,p) basis set for the other atoms, with the inclusion of solvation energy corrections using a self-consistent reaction field (SCRF) based on SMD implicit solvent model<sup>9</sup> with 2-methyl-2-propanol as solvent. Multiwfn 3.8<sup>10</sup> was used to perform the independent gradient model based on Hirshfeld partition (IGMH) analyses<sup>11</sup> with the high-quality grid option. The calculated structures were visualized with VMD 1.9.3.<sup>12</sup> or CYLView<sup>13</sup>.

### 4.1 DFT-calculated stereoselectivity for desymmetrization

The mechanistic experiments show that the irreversible activation of C–H bond is the decisive step of the reaction. Based on the experimental results, we then reveal the chiral induction model through DFT calculations. The C–H bond activation transition states of the two phenyl groups (colored by blue and black) of phosphoramidate are located (Figure S2a). In **TS2-R**, there is a significant steric repulsion between the methyl group on directing group and the phenyl group of phosphoramidate, so the favorable conformer for generating *R* enantiomer is **TS1-R**. In the transition states that generates the *S* enantiomer, due to the favorable  $\pi$ - $\pi$  stacking in **TS1-S**, its energy is 1.6 kcal/mol lower than that of **TS2-S**. Therefore, the enantioselectivity is determined by **TS1-R** and **TS1-S**. The energy difference of 1.9 kcal/mol is consistent with the high ee value in the experiment. To elucidate the chiral induction model, the

C–H bond activation transition state of benzene catalyzed by Pd/L-pGlu-OH was optimized. The model transition state **TS1** suggested that the chiral amino acid intrinsically prefers to have the C–H bond activation occurring in the fourth quadrant (Figure S2b). The geometries of the benzene and pyridine fragments match well with the central chirality of the favored transition state **TS1-R** when the phosphamide tether links the two fragments in substrate **1g**. In contrast, chirality mismatch exists in the disfavored transition state **TS1-S**. Thus, significant distortion of the amino acid ligand is required to have the C–H bond activation occurring in the fourth quadrant. The pyramidalization angle of the amino acid nitrogen in **TS1-S** is only  $13.7^\circ$ , indicating that the amino acid nitrogen is much more planar as compared to that in **TS1** or **TS1-R** ( $25.6^\circ$ ,  $27.4^\circ$ , respectively). In addition, there is an energy difference of 2.6 kcal/mol for Pd(L-pGlu-OH) fragments in **TS1-R** and **TS1-S**, which further supports the chiral induction model in which the distortion of ligand determines the enantioselectivity.

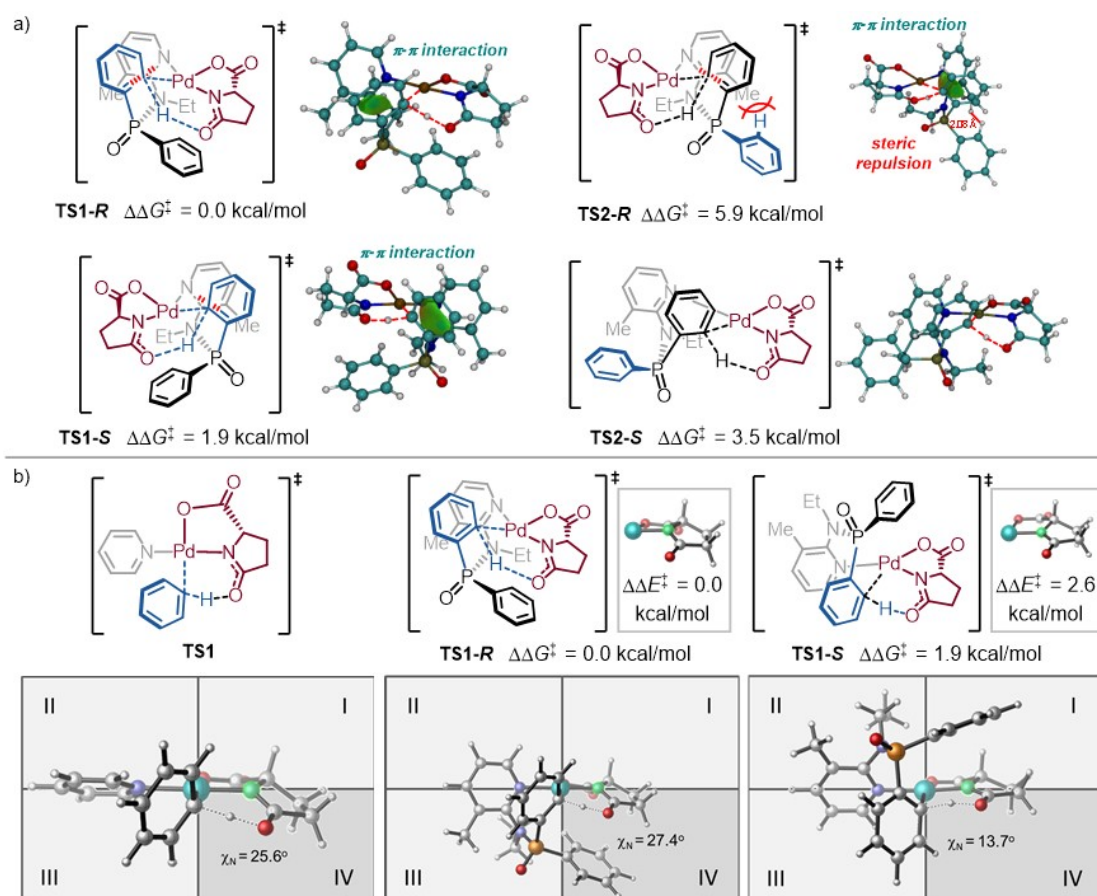

Figure S2. Origins of enantioselectivity in Pd/L-pGlu-OH-catalyzed asymmetric C–H

olefination of phosphinamide. a) The optimized transition states for giving R/S-enantiomer and their relative Gibbs free energies. b) Chiral induction through ligand distortion.

## 4.2 DFT-calculated stereoselectivity for kinetic resolution

We also calculated the stereoselective outcome for the kinetic resolution result when one the phenyl is replaced with methyl. The results show that in this case, the stereodiscrimination becomes worse. The energy span that determines the enantioselectivity is reduced to 0.9 kcal/mol (**TS1-R(Me)** vs. **TS1-S(Me)**), which is consistent with the experimental results (71 % ee).

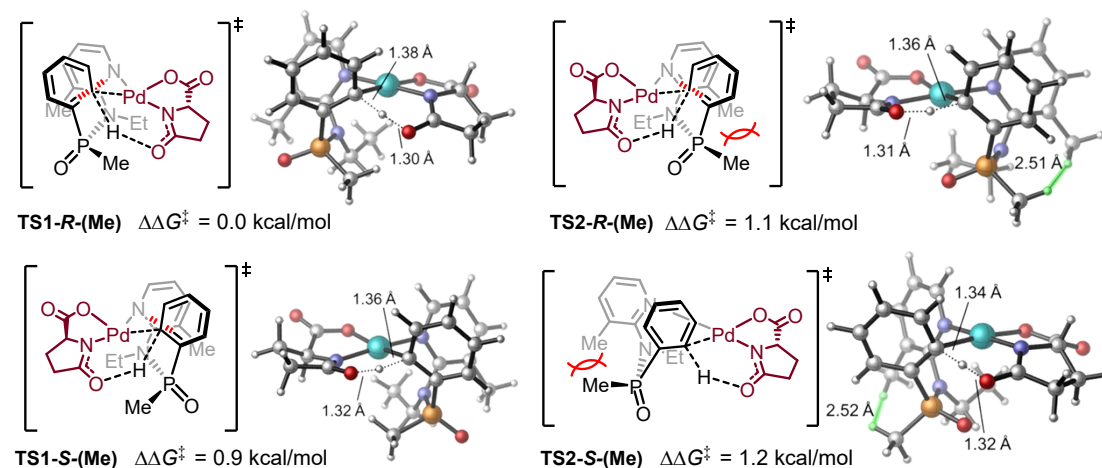

Figure S3. DFT-optimized structures of stereoselective C-H activation transition state and their relative energies.

## 4.3 Table of energies

Zero-point correction (*ZPE*), thermal correction to enthalpy (*TCH*), thermal correction to Gibbs free energy (*TCG*), energies (*E*), enthalpies (*H*), and Gibbs free energies (*G*) (in Hartree) of the structures calculated at the M06L/6-311+G(d,p)-SDD-SMD(2-methyl-2-propanol)//B3LYP-D3(BJ)/6-31G(d)-LANL2DZ level of theory.

Table S6. Energies for all calculated species

| Structures   | <i>ZPE</i> | <i>tcH</i> | <i>tcG</i> | <i>E</i>     | <i>H</i>     | <i>G</i>     | Imaginary<br>Frequency |
|--------------|------------|------------|------------|--------------|--------------|--------------|------------------------|
| <b>TS1-R</b> | 0.471725   | 0.503407   | 0.410553   | -1903.133045 | -1902.629638 | -1902.722492 | 1180.9i                |
| <b>TS2-R</b> | 0.470878   | 0.502965   | 0.408071   | -1903.121212 | -1902.618247 | -1902.713141 | 1323.9i                |
| <b>TS1-S</b> | 0.471031   | 0.502995   | 0.409012   | -1903.128437 | -1902.625442 | -1902.719425 | 1369.5i                |

|                   |          |          |          |              |              |              |                 |
|-------------------|----------|----------|----------|--------------|--------------|--------------|-----------------|
| <b>TS2-S</b>      | 0.471080 | 0.503082 | 0.408658 | -1903.125515 | -1902.622433 | -1902.716857 | 1356.5 <i>i</i> |
| <b>TS1-R-(Me)</b> | 0.417490 | 0.446296 | 0.359866 | -1711.371302 | -1710.925006 | -1711.011436 | 1480.4 <i>i</i> |
| <b>TS2-R-(Me)</b> | 0.416610 | 0.445770 | 0.358069 | -1711.367711 | -1710.921941 | -1711.009642 | 1377.1 <i>i</i> |
| <b>TS1-S-(Me)</b> | 0.416988 | 0.446033 | 0.358857 | -1711.368833 | -1710.922800 | -1711.009976 | 1413.1 <i>i</i> |
| <b>TS2-S-(Me)</b> | 0.417061 | 0.445969 | 0.359219 | -1711.368806 | -1710.922837 | -1711.009587 | 1238.8 <i>i</i> |

#### 4.4 Cartesian coordinates of the structures

##### TS1

|    |             |             |             |
|----|-------------|-------------|-------------|
| C  | -1.55085400 | 1.87633400  | 1.22260400  |
| C  | -2.79583000 | 2.49256900  | 1.12161700  |
| C  | -0.69290100 | 1.75535500  | 0.10458200  |
| C  | -3.21918700 | 2.99813100  | -0.11282000 |
| C  | -1.14057400 | 2.29694700  | -1.12199300 |
| H  | 0.57220700  | 2.10616200  | 0.42728100  |
| C  | -2.39189500 | 2.90310500  | -1.23694400 |
| H  | -4.19173800 | 3.47625900  | -0.19644100 |
| H  | -0.48858500 | 2.24248400  | -1.99020000 |
| H  | -2.72230200 | 3.30728700  | -2.19008800 |
| C  | 2.52153200  | 1.58809400  | 0.31400600  |
| C  | 3.11721000  | -0.47478000 | -0.56458900 |
| C  | 4.32270200  | 0.01769200  | 0.26693800  |
| C  | 4.03645100  | 1.52799000  | 0.44181200  |
| H  | 3.34981900  | -0.45706400 | -1.64032400 |
| H  | 4.31862600  | -0.48894800 | 1.23714800  |
| H  | 5.27976400  | -0.19337500 | -0.21360700 |
| H  | 4.36171600  | 1.94332400  | 1.39886600  |
| H  | 4.48914300  | 2.13371000  | -0.35374800 |
| N  | 2.07375300  | 0.50626600  | -0.27854600 |
| O  | 1.77419900  | 2.53271700  | 0.72824400  |
| C  | 2.58489500  | -1.88467900 | -0.25327800 |
| O  | 3.34917000  | -2.81271500 | -0.04837500 |
| O  | 1.27063700  | -1.99154300 | -0.27705900 |
| Pd | 0.23792400  | -0.20531500 | -0.16196200 |
| C  | -2.79182600 | -0.72065600 | -0.32933900 |
| C  | -3.96601000 | -1.45721200 | -0.21861000 |
| C  | -1.51763500 | -2.51790300 | 0.40778700  |
| C  | -3.89900700 | -2.77349300 | 0.23526900  |
| H  | -4.91129800 | -0.99762800 | -0.48659500 |
| C  | -2.65174200 | -3.31072100 | 0.54919300  |
| H  | -0.51620000 | -2.88829800 | 0.59818600  |
| H  | -4.80039200 | -3.37071900 | 0.33594000  |



|   |             |             |             |
|---|-------------|-------------|-------------|
| H | -2.54670900 | -4.33304300 | 0.89587200  |
| N | -1.59140600 | -1.23940700 | -0.01395100 |
| H | -1.22225800 | 1.48475300  | 2.18205600  |
| H | -3.43864200 | 2.58095800  | 1.99333600  |
| H | -2.79809700 | 0.30231800  | -0.67984700 |

**TS1-R**

|    |             |             |             |
|----|-------------|-------------|-------------|
| C  | 1.26928600  | 1.25819600  | 1.31464200  |
| C  | 2.41315200  | 1.69648800  | 1.98246300  |
| C  | 0.40345800  | 0.29615600  | 1.89702600  |
| C  | 2.74455800  | 1.14815900  | 3.22629600  |
| C  | 0.76099100  | -0.22317300 | 3.15830000  |
| H  | -0.88760100 | 0.60169000  | 1.87942000  |
| C  | 1.92479500  | 0.18204200  | 3.81267100  |
| H  | 3.64214800  | 1.48294400  | 3.73921700  |
| H  | 0.09421500  | -0.93725600 | 3.63505700  |
| H  | 2.18503900  | -0.23755800 | 4.78065200  |
| C  | -2.77533700 | -0.04888500 | 1.46494900  |
| C  | -3.05066100 | -2.00720600 | 0.23969400  |
| C  | -4.41259000 | -1.27424800 | 0.20105900  |
| C  | -4.27707100 | -0.15764600 | 1.26492900  |
| H  | -3.12239800 | -2.96539400 | 0.77468300  |
| H  | -4.56117300 | -0.85695700 | -0.79736100 |
| H  | -5.24835500 | -1.94813800 | 0.40027700  |
| H  | -4.67849200 | 0.80859400  | 0.95030800  |
| H  | -4.75090100 | -0.42054500 | 2.21841800  |
| N  | -2.16925100 | -1.10525000 | 0.97265200  |
| O  | -2.17324400 | 0.92594700  | 2.01648600  |
| C  | -2.37967000 | -2.30513000 | -1.11961300 |
| O  | -3.04292600 | -2.49107500 | -2.12840100 |
| O  | -1.06404200 | -2.35153100 | -1.06971600 |
| Pd | -0.26516300 | -1.19661100 | 0.46814900  |
| C  | 2.32126800  | -0.40489100 | -0.85416000 |
| C  | 3.70717800  | -0.39141900 | -1.09977200 |
| C  | 2.47971900  | -2.40162600 | 0.34727900  |
| C  | 4.45431200  | -1.47105000 | -0.62106100 |
| C  | 3.84179800  | -2.49524800 | 0.09689900  |
| H  | 1.94488200  | -3.14390500 | 0.92831600  |
| H  | 5.52676700  | -1.49186200 | -0.79514700 |
| H  | 4.40853000  | -3.33794400 | 0.47696300  |
| N  | 1.74496400  | -1.38305000 | -0.12446100 |
| P  | 1.02424400  | 1.93034100  | -0.36662100 |
| H  | 3.03927800  | 2.45495100  | 1.52241400  |
| N  | 1.45249100  | 0.59210100  | -1.34818300 |

|   |             |             |             |
|---|-------------|-------------|-------------|
| C | 1.33050700  | 0.71862400  | -2.82089300 |
| H | 2.22730800  | 1.17708300  | -3.25224500 |
| H | 0.50886400  | 1.41457900  | -3.00392400 |
| C | 4.37002000  | 0.76442700  | -1.80239600 |
| H | 3.87138400  | 1.70845000  | -1.56332000 |
| H | 5.42017100  | 0.83612300  | -1.50385200 |
| H | 4.34753600  | 0.63963800  | -2.89196200 |
| C | -0.74271100 | 2.16146000  | -0.69463500 |
| C | -1.32696000 | 3.36210700  | -0.26633600 |
| C | -1.52795500 | 1.20691900  | -1.35621700 |
| C | -2.68464000 | 3.59241700  | -0.47860900 |
| H | -0.71321300 | 4.11213900  | 0.22283200  |
| C | -2.88019700 | 1.45146300  | -1.59042400 |
| H | -1.09112100 | 0.27352400  | -1.68606400 |
| C | -3.46115000 | 2.63958600  | -1.14319500 |
| H | -3.13510500 | 4.51903500  | -0.13542000 |
| H | -3.46744700 | 0.70885500  | -2.12157900 |
| H | -4.51625500 | 2.82871300  | -1.32158500 |
| O | 1.83778900  | 3.17206300  | -0.58754500 |
| C | 1.03612700  | -0.62945600 | -3.47500800 |
| H | 0.83345800  | -0.48481600 | -4.54144000 |
| H | 1.89277600  | -1.30718800 | -3.38822500 |
| H | 0.17616000  | -1.12403100 | -3.01197400 |

**TS2-R**

|   |             |             |             |
|---|-------------|-------------|-------------|
| C | 1.02976800  | -0.60858300 | 1.40462200  |
| C | 2.00950500  | -0.25648700 | 2.33571300  |
| C | -0.34181200 | -0.64520600 | 1.75770200  |
| C | 1.63644100  | 0.09308400  | 3.63586600  |
| C | -0.68072200 | -0.28180700 | 3.07768600  |
| H | -1.17083500 | -1.66548500 | 1.45220700  |
| C | 0.28969800  | 0.08874700  | 4.00689000  |
| H | 2.39998600  | 0.36413400  | 4.35986600  |
| H | -1.72497100 | -0.32889000 | 3.37571900  |
| H | 0.00470500  | 0.36040300  | 5.01971700  |
| C | 1.03126700  | 1.87294700  | -0.37018000 |
| C | 1.88786600  | 2.99441900  | -0.40733900 |
| C | 1.47330600  | 4.15141200  | 0.25643700  |
| C | -0.53083200 | 3.04920300  | 0.92287200  |
| C | 0.25833100  | 4.18949600  | 0.93363000  |
| H | 2.12142900  | 5.02389400  | 0.24897100  |
| H | -1.49650000 | 3.00766800  | 1.41228700  |
| H | -0.07460000 | 5.07971000  | 1.45517900  |
| N | -0.15501900 | 1.93417200  | 0.27775000  |

|    |             |             |             |
|----|-------------|-------------|-------------|
| C  | -2.92081500 | -2.21265300 | 0.57562500  |
| C  | -3.77462100 | -0.89631200 | -1.13369600 |
| C  | -4.94145000 | -1.77569300 | -0.64449100 |
| C  | -4.20399200 | -2.90440700 | 0.12703000  |
| H  | -3.39133900 | -1.27475700 | -2.09585900 |
| H  | -5.57218800 | -1.19464500 | 0.03645200  |
| H  | -5.56994700 | -2.14304200 | -1.45815500 |
| H  | -4.75504500 | -3.30398700 | 0.98232300  |
| H  | -3.94434600 | -3.74802000 | -0.52566400 |
| N  | -2.76865200 | -1.11058100 | -0.10890600 |
| O  | -2.10640700 | -2.60359900 | 1.47424500  |
| C  | -3.95311000 | 0.62026400  | -1.31751400 |
| O  | -4.98539400 | 1.09436900  | -1.76168000 |
| O  | -2.87392800 | 1.32218400  | -1.01941100 |
| Pd | -1.50187200 | 0.33267800  | 0.18070000  |
| C  | 3.20870500  | 2.98009200  | -1.13235400 |
| H  | 3.11607400  | 3.43109900  | -2.12840200 |
| H  | 3.95469000  | 3.56290700  | -0.58221800 |
| H  | 3.58429700  | 1.96553700  | -1.26749600 |
| N  | 1.38630600  | 0.67946100  | -1.03298300 |
| C  | 1.35346400  | 0.70790800  | -2.52046600 |
| H  | 1.82566800  | 1.63737000  | -2.85107000 |
| H  | 1.98924200  | -0.11094500 | -2.87279100 |
| P  | 1.39632900  | -0.90508800 | -0.34918700 |
| H  | 3.05860800  | -0.25357100 | 2.06068500  |
| O  | 0.50161800  | -1.88988100 | -1.03457800 |
| C  | 3.13482900  | -1.42007300 | -0.49983200 |
| C  | 3.38029400  | -2.73979400 | -0.90175500 |
| C  | 4.21604600  | -0.57102200 | -0.22379600 |
| C  | 4.69108700  | -3.20287400 | -1.02198100 |
| H  | 2.53543100  | -3.38231900 | -1.12674000 |
| C  | 5.52478300  | -1.03680700 | -0.33939000 |
| H  | 4.03484800  | 0.45388600  | 0.08086400  |
| C  | 5.76270000  | -2.35420500 | -0.73958500 |
| H  | 4.87548600  | -4.22530200 | -1.33878100 |
| H  | 6.35744700  | -0.37336100 | -0.12348800 |
| H  | 6.78259400  | -2.71612900 | -0.83395900 |
| C  | -0.05743000 | 0.58398800  | -3.09187200 |
| H  | -0.48627500 | -0.38120400 | -2.81385300 |
| H  | -0.71709700 | 1.37062200  | -2.71324800 |
| H  | -0.02160600 | 0.65778800  | -4.18551800 |

**TS1-S**

|   |             |            |            |
|---|-------------|------------|------------|
| C | -1.28315000 | 1.10861700 | 1.41805200 |
|---|-------------|------------|------------|

|    |             |             |             |
|----|-------------|-------------|-------------|
| C  | -2.38751500 | 1.31259500  | 2.24793000  |
| C  | -0.22156400 | 0.24921900  | 1.79628100  |
| C  | -2.47557600 | 0.63427500  | 3.46695600  |
| C  | -0.34504000 | -0.41321500 | 3.03789300  |
| H  | 1.06995300  | 0.64504900  | 1.75944200  |
| C  | -1.45691500 | -0.23599300 | 3.86052600  |
| H  | -3.33828900 | 0.78905700  | 4.10920800  |
| H  | 0.47143700  | -1.05069800 | 3.36749500  |
| H  | -1.52485200 | -0.76017600 | 4.80992300  |
| C  | -2.31039200 | -0.57947600 | -0.75678000 |
| C  | -3.70230700 | -0.70214100 | -0.90665100 |
| C  | -4.29095400 | -1.88865300 | -0.45425200 |
| C  | -2.15727200 | -2.66415100 | 0.29087600  |
| C  | -3.52027200 | -2.88556500 | 0.13651700  |
| H  | -5.36532000 | -2.01699400 | -0.55483700 |
| H  | -1.49813700 | -3.38487900 | 0.76040000  |
| H  | -3.96457400 | -3.80962500 | 0.48941400  |
| N  | -1.57905700 | -1.53764600 | -0.14682000 |
| C  | 2.95100900  | 0.11288100  | 1.20266200  |
| C  | 3.22709400  | -1.36206300 | -0.56056400 |
| C  | 4.56533700  | -1.35153100 | 0.19919100  |
| C  | 4.45699500  | -0.04152700 | 1.02649500  |
| H  | 3.32018300  | -0.76290100 | -1.48384100 |
| H  | 4.61349200  | -2.22196900 | 0.86153900  |
| H  | 5.43351000  | -1.37941100 | -0.46227600 |
| H  | 4.96867800  | -0.06779400 | 1.99188400  |
| H  | 4.83422900  | 0.82836900  | 0.47233200  |
| N  | 2.33718100  | -0.67394100 | 0.35785600  |
| O  | 2.34615900  | 0.87876600  | 2.02122000  |
| C  | 2.54970300  | -2.67572300 | -0.98673000 |
| O  | 3.19900500  | -3.64335100 | -1.34596100 |
| O  | 1.23099300  | -2.60533100 | -0.99446800 |
| Pd | 0.44019700  | -1.10312500 | 0.20760400  |
| C  | -4.53844500 | 0.40661800  | -1.49159100 |
| H  | -4.59080800 | 0.33362600  | -2.58504600 |
| H  | -5.56313800 | 0.34530200  | -1.11283400 |
| H  | -4.12922700 | 1.38855200  | -1.23704500 |
| N  | -1.58184900 | 0.54140300  | -1.23818100 |
| C  | -1.53638800 | 0.72387400  | -2.70679300 |
| H  | -2.52388800 | 0.99030100  | -3.10123600 |
| H  | -0.88503600 | 1.58096800  | -2.89410900 |
| P  | -1.35955200 | 1.90072500  | -0.21813400 |
| H  | -3.17341000 | 1.98957000  | 1.92686000  |
| O  | -2.42592200 | 2.95542700  | -0.29086500 |

|   |             |             |             |
|---|-------------|-------------|-------------|
| C | 0.28854100  | 2.53140600  | -0.62987600 |
| C | 0.58722700  | 3.83188400  | -0.19460800 |
| C | 1.26915200  | 1.78260300  | -1.29267500 |
| C | 1.85958700  | 4.36216400  | -0.39696400 |
| H | -0.18339900 | 4.41982100  | 0.29407800  |
| C | 2.53771900  | 2.32135500  | -1.50426800 |
| H | 1.04471500  | 0.77924200  | -1.63156800 |
| C | 2.83707100  | 3.60584500  | -1.04843100 |
| H | 2.08800300  | 5.36589300  | -0.05110400 |
| H | 3.29048000  | 1.73581200  | -2.02479900 |
| H | 3.82797800  | 4.02176600  | -1.20776500 |
| C | -0.99312700 | -0.51819300 | -3.40851600 |
| H | -0.89264600 | -0.32512700 | -4.48189100 |
| H | -0.01850200 | -0.81138300 | -3.00618700 |
| H | -1.66612700 | -1.37292900 | -3.28330200 |

### TS2-S

|    |             |             |             |
|----|-------------|-------------|-------------|
| C  | 0.90330000  | -1.83097900 | -0.41009600 |
| C  | 1.71988500  | -2.65499400 | -1.19164000 |
| C  | -0.49488400 | -1.77365400 | -0.64213400 |
| C  | 1.17536200  | -3.39897600 | -2.24208200 |
| C  | -1.01269700 | -2.55365900 | -1.69829600 |
| H  | -1.31457600 | -1.89909100 | 0.42942900  |
| C  | -0.19324200 | -3.34467200 | -2.50292800 |
| H  | 1.82355200  | -4.02564700 | -2.84834100 |
| H  | -2.08565500 | -2.54335700 | -1.86855100 |
| H  | -0.61822600 | -3.92568800 | -3.31671300 |
| C  | -3.24795000 | -1.49580000 | 0.95632000  |
| C  | -4.37808100 | 0.23809500  | -0.09760700 |
| C  | -5.12407700 | -0.04771900 | 1.23101700  |
| C  | -4.59614700 | -1.43838900 | 1.65484500  |
| H  | -5.00450000 | -0.01274800 | -0.96538800 |
| H  | -4.84147900 | 0.70875600  | 1.96962900  |
| H  | -6.20892500 | -0.00843000 | 1.11813100  |
| H  | -4.47761900 | -1.56743100 | 2.73331800  |
| H  | -5.22937500 | -2.25663900 | 1.28929100  |
| N  | -3.21842300 | -0.64788200 | -0.05100900 |
| O  | -2.26285400 | -2.22523900 | 1.30090700  |
| C  | -3.91116200 | 1.69766100  | -0.28890800 |
| O  | -4.69373900 | 2.61556300  | -0.10463900 |
| O  | -2.66155700 | 1.85331800  | -0.67503300 |
| Pd | -1.50809500 | 0.14714100  | -0.63524200 |
| C  | 1.08342200  | 1.47562400  | -0.01062100 |
| C  | 2.07156600  | 2.47780300  | -0.07932200 |

|   |             |             |             |
|---|-------------|-------------|-------------|
| C | 0.24343500  | 2.06313700  | -2.11541500 |
| C | 2.10288500  | 3.27236100  | -1.22913300 |
| C | 1.19148800  | 3.06705200  | -2.26067900 |
| H | -0.51700600 | 1.87025700  | -2.86243900 |
| H | 2.85993100  | 4.04716000  | -1.31574100 |
| H | 1.20511500  | 3.67572600  | -3.15793100 |
| N | 0.19780700  | 1.29467300  | -1.01622400 |
| P | 1.65187200  | -0.97960700 | 1.01374100  |
| H | 2.78419500  | -2.71941300 | -0.99128600 |
| N | 0.98096400  | 0.59605900  | 1.08520100  |
| C | 0.53686200  | 1.12729200  | 2.39712200  |
| H | 1.05569900  | 0.55876200  | 3.17145000  |
| H | 0.86566700  | 2.16930600  | 2.46636500  |
| C | 3.07008800  | 2.69398700  | 1.02650300  |
| H | 4.03310100  | 3.00786700  | 0.61339900  |
| H | 2.73067500  | 3.47834500  | 1.71432500  |
| H | 3.22930100  | 1.78379100  | 1.60519300  |
| C | 3.39442500  | -0.69691700 | 0.55917300  |
| C | 3.78640000  | -0.19454700 | -0.69110300 |
| C | 4.35364700  | -0.87277600 | 1.56538700  |
| C | 5.11946400  | 0.14112700  | -0.92376500 |
| H | 3.05502200  | -0.07326700 | -1.48431200 |
| C | 5.68714600  | -0.53776700 | 1.32861500  |
| H | 4.03720400  | -1.27136900 | 2.52440100  |
| C | 6.06949500  | -0.02534500 | 0.08721300  |
| H | 5.41764900  | 0.52918400  | -1.89367500 |
| H | 6.42751800  | -0.67853800 | 2.11085800  |
| H | 7.10764600  | 0.23707700  | -0.09597800 |
| O | 1.50736200  | -1.66421900 | 2.33581500  |
| C | -0.97274000 | 1.02852700  | 2.59720800  |
| H | -1.51560000 | 1.59370000  | 1.83338500  |
| H | -1.28748000 | -0.01798900 | 2.55412200  |
| H | -1.24101500 | 1.43112100  | 3.58184900  |

**TS1-R-(Me)**

|   |             |            |             |
|---|-------------|------------|-------------|
| C | -1.35673300 | 1.88096900 | 0.14299100  |
| C | -2.39533000 | 2.65219600 | -0.37887700 |
| C | -0.08737600 | 1.82941900 | -0.49240500 |
| C | -2.20196700 | 3.37355300 | -1.56252800 |
| C | 0.07656900  | 2.58764800 | -1.66989200 |
| H | 1.01222100  | 1.99469400 | 0.31775900  |
| C | -0.96658200 | 3.34304700 | -2.20956400 |
| H | -3.01688600 | 3.96417900 | -1.97218600 |
| H | 1.04835600  | 2.58904100 | -2.15720100 |

|    |             |             |             |
|----|-------------|-------------|-------------|
| H  | -0.81621500 | 3.90986200  | -3.12439700 |
| C  | 2.92796500  | 1.39080000  | 0.60423000  |
| C  | 3.70684400  | -0.52174400 | -0.45054300 |
| C  | 4.67003900  | -0.23703300 | 0.72682200  |
| C  | 4.35254800  | 1.22998200  | 1.10749000  |
| H  | 4.20707000  | -0.36783800 | -1.41788900 |
| H  | 4.43020500  | -0.91056200 | 1.55544500  |
| H  | 5.71615200  | -0.40038400 | 0.46205400  |
| H  | 4.41402700  | 1.44287100  | 2.17775500  |
| H  | 5.00240100  | 1.94717700  | 0.59004400  |
| N  | 2.65006800  | 0.47043600  | -0.28459600 |
| O  | 2.08840000  | 2.27383000  | 0.99672900  |
| C  | 3.07295600  | -1.92833400 | -0.49366800 |
| O  | 3.75316100  | -2.91564700 | -0.26695100 |
| O  | 1.79666000  | -1.95773600 | -0.81843000 |
| Pd | 0.82206600  | -0.13620600 | -0.70019100 |
| C  | -1.89641300 | -1.10625400 | -0.02512500 |
| C  | -3.18101500 | -1.65688700 | -0.17087200 |
| C  | -1.43491100 | -1.35824800 | -2.30107300 |
| C  | -3.55299400 | -2.07397000 | -1.45302300 |
| C  | -2.67984400 | -1.92998600 | -2.52850000 |
| H  | -0.70628500 | -1.21410700 | -3.09002900 |
| H  | -4.53883400 | -2.50491700 | -1.60414100 |
| H  | -2.95673100 | -2.24910300 | -3.52720300 |
| N  | -1.06356600 | -0.96229200 | -1.07505100 |
| P  | -1.73400600 | 0.95163700  | 1.66668600  |
| H  | -3.34921100 | 2.67312600  | 0.13943400  |
| N  | -1.37508600 | -0.66261900 | 1.21805900  |
| C  | -1.07028300 | -1.68537100 | 2.24820800  |
| H  | -1.95355200 | -1.90078700 | 2.86446200  |
| H  | -0.31417500 | -1.24878800 | 2.90539100  |
| C  | -4.11441100 | -1.78191400 | 1.00329100  |
| H  | -4.12372600 | -0.85804700 | 1.59017300  |
| H  | -5.13063400 | -1.99886000 | 0.66194800  |
| H  | -3.80566700 | -2.60033700 | 1.66541100  |
| C  | -0.46004100 | 1.37135200  | 2.89488000  |
| O  | -3.13679300 | 1.20076200  | 2.14477900  |
| C  | -0.51474800 | -2.96979200 | 1.63797200  |
| H  | -0.20760800 | -3.64527900 | 2.44320900  |
| H  | -1.26876800 | -3.49138900 | 1.03883500  |
| H  | 0.34947100  | -2.76971900 | 0.99695300  |
| H  | -0.55829000 | 2.44059200  | 3.10328800  |
| H  | -0.64550700 | 0.82536800  | 3.82336700  |
| H  | 0.55026400  | 1.17920400  | 2.52925400  |

**TS2-R-(Me)**

|    |             |             |             |
|----|-------------|-------------|-------------|
| C  | 1.25677300  | 1.85319700  | 0.14958500  |
| C  | 2.39961000  | 2.42827100  | -0.41275600 |
| C  | 0.03357700  | 1.80469800  | -0.56203000 |
| C  | 2.34566400  | 2.96805900  | -1.70007200 |
| C  | 0.01657800  | 2.35757600  | -1.85958900 |
| H  | -1.17492700 | 2.11490000  | -0.02502000 |
| C  | 1.15318400  | 2.93143300  | -2.42672700 |
| H  | 3.23489100  | 3.41689500  | -2.13413000 |
| H  | -0.91968500 | 2.35469900  | -2.41183700 |
| H  | 1.11453500  | 3.35333100  | -3.42738000 |
| C  | 2.09813100  | -1.00714800 | -0.05378300 |
| C  | 3.38056600  | -1.48007200 | -0.39684400 |
| C  | 3.58540700  | -1.91042700 | -1.70991700 |
| C  | 1.32338900  | -1.35794500 | -2.23413800 |
| C  | 2.55246100  | -1.85758900 | -2.64163400 |
| H  | 4.56687400  | -2.27428000 | -2.00209400 |
| H  | 0.47504900  | -1.28657100 | -2.90435300 |
| H  | 2.69393900  | -2.18771300 | -3.66464300 |
| N  | 1.10846400  | -0.95112500 | -0.97372200 |
| C  | -3.07024400 | 1.47654900  | 0.29961000  |
| C  | -3.49469500 | -0.80076800 | 0.42417000  |
| C  | -4.85600400 | -0.12168900 | 0.17956300  |
| C  | -4.56561100 | 1.35315300  | 0.57006300  |
| H  | -3.41344700 | -1.12224100 | 1.47567000  |
| H  | -5.11113000 | -0.19410500 | -0.88286900 |
| H  | -5.66733000 | -0.57274100 | 0.75417700  |
| H  | -5.13079300 | 2.09354000  | -0.00193600 |
| H  | -4.75157600 | 1.54216400  | 1.63528700  |
| N  | -2.55473400 | 0.28148200  | 0.18837200  |
| O  | -2.39552900 | 2.55182500  | 0.18201800  |
| C  | -3.05673600 | -2.00770400 | -0.42249000 |
| O  | -3.84774900 | -2.87078600 | -0.76400200 |
| O  | -1.75884900 | -2.04208800 | -0.66936100 |
| Pd | -0.78456500 | -0.22877900 | -0.42876300 |
| C  | 4.50054600  | -1.50429100 | 0.60873600  |
| H  | 4.49613100  | -2.43133400 | 1.19530900  |
| H  | 5.47116400  | -1.43845500 | 0.10817800  |
| H  | 4.40675800  | -0.67657800 | 1.31623400  |
| N  | 1.82233300  | -0.60233200 | 1.26914500  |
| C  | 1.63604200  | -1.68466500 | 2.26944100  |
| H  | 2.40634100  | -2.44179300 | 2.08924800  |
| H  | 1.83833700  | -1.25906100 | 3.25778900  |



|   |             |             |            |
|---|-------------|-------------|------------|
| P | 1.29835500  | 0.97224400  | 1.73592200 |
| H | 3.33846500  | 2.45047600  | 0.13217700 |
| O | 0.03803400  | 0.98241300  | 2.54036000 |
| C | 2.71329300  | 1.62640600  | 2.69132900 |
| C | 0.24261100  | -2.30867000 | 2.23637300 |
| H | -0.50580300 | -1.55113100 | 2.48025200 |
| H | 0.00449000  | -2.71769500 | 1.25019600 |
| H | 0.18211800  | -3.11970800 | 2.97230900 |
| H | 3.65568500  | 1.57224600  | 2.13999900 |
| H | 2.51079500  | 2.66369900  | 2.97336300 |
| H | 2.80682100  | 1.03428600  | 3.60630500 |

**TS1-S-(Me)**

|   |             |             |             |
|---|-------------|-------------|-------------|
| C | 1.30074000  | 1.85553300  | 0.17718300  |
| C | 2.38526100  | 2.53189400  | -0.38378100 |
| C | 0.05794800  | 1.75838800  | -0.49879200 |
| C | 2.26458900  | 3.10900800  | -1.65140500 |
| C | -0.02540700 | 2.35772100  | -1.77473500 |
| H | -1.12923800 | 2.07970000  | 0.07868800  |
| C | 1.06018200  | 3.01671400  | -2.35145600 |
| H | 3.11078600  | 3.63115300  | -2.08952200 |
| H | -0.97648800 | 2.32722300  | -2.30033700 |
| H | 0.96688800  | 3.46656700  | -3.33616900 |
| C | 1.99780100  | -1.00063900 | -0.07033500 |
| C | 3.32643000  | -1.36801400 | -0.33646500 |
| C | 3.63558000  | -1.73042600 | -1.65258300 |
| C | 1.37530000  | -1.29794300 | -2.30416700 |
| C | 2.65963300  | -1.70554600 | -2.64515700 |
| H | 4.65421600  | -2.01978700 | -1.89633600 |
| H | 0.56904600  | -1.24157200 | -3.02597900 |
| H | 2.88767600  | -1.98377400 | -3.66812900 |
| N | 1.06477300  | -0.95927700 | -1.04652000 |
| C | -3.04369100 | 1.47761700  | 0.41833300  |
| C | -3.54281500 | -0.78578000 | 0.44072600  |
| C | -4.86902600 | -0.04965800 | 0.16723700  |
| C | -4.55059800 | 1.39739100  | 0.62846100  |
| H | -3.52585300 | -1.16335500 | 1.47640300  |
| H | -5.07895800 | -0.07106000 | -0.90721000 |
| H | -5.71922000 | -0.49657700 | 0.68583800  |
| H | -5.06530800 | 2.17832100  | 0.06299900  |
| H | -4.77829200 | 1.55308900  | 1.69121000  |
| N | -2.55026500 | 0.27074700  | 0.30422400  |
| O | -2.33453200 | 2.53618600  | 0.34898200  |
| C | -3.12487300 | -1.97138300 | -0.44758100 |

|    |             |             |             |
|----|-------------|-------------|-------------|
| O  | -3.94344300 | -2.78934700 | -0.83171000 |
| O  | -1.82615200 | -2.04289400 | -0.67325100 |
| Pd | -0.81017100 | -0.25226400 | -0.42955100 |
| C  | 4.37609800  | -1.34795200 | 0.74343900  |
| H  | 4.34313600  | -2.26527800 | 1.34452300  |
| H  | 5.37505700  | -1.28176800 | 0.30241500  |
| H  | 4.23016300  | -0.49921800 | 1.41847300  |
| N  | 1.53265900  | -0.65720300 | 1.22556000  |
| C  | 1.46800500  | -1.73981700 | 2.23208800  |
| H  | 2.46619000  | -1.97655900 | 2.62229600  |
| H  | 0.88603400  | -1.35077900 | 3.07162200  |
| P  | 1.61853300  | 0.98072500  | 1.73957800  |
| H  | 3.31755200  | 2.58861400  | 0.17022000  |
| O  | 2.91258200  | 1.37992600  | 2.38719600  |
| C  | 0.15387700  | 1.20412900  | 2.80068500  |
| C  | 0.79190300  | -2.99284800 | 1.68050000  |
| H  | 0.68614100  | -3.73404700 | 2.47991800  |
| H  | -0.19651600 | -2.76600800 | 1.26945900  |
| H  | 1.38652600  | -3.44908600 | 0.88185200  |
| H  | -0.74242500 | 0.77843800  | 2.34402800  |
| H  | 0.33178500  | 0.74892000  | 3.77827800  |
| H  | 0.01153800  | 2.27895600  | 2.94540100  |

**TS2-S-(Me)**

|   |             |             |             |
|---|-------------|-------------|-------------|
| C | -1.12708600 | 1.84040000  | 0.52788300  |
| C | -2.32285100 | 2.52156200  | 0.29954300  |
| C | -0.02475100 | 1.97993700  | -0.35414800 |
| C | -2.44777300 | 3.34747400  | -0.82287200 |
| C | -0.18154200 | 2.82482200  | -1.46879200 |
| H | 1.18319000  | 2.10337900  | 0.21004700  |
| C | -1.38014300 | 3.49853700  | -1.70932600 |
| H | -3.38117600 | 3.87449000  | -1.00088600 |
| H | 0.65919800  | 2.96053600  | -2.14444400 |
| H | -1.48439600 | 4.14249400  | -2.57838700 |
| C | 3.05400600  | 1.34272000  | 0.39962900  |
| C | 3.58877900  | -0.69364700 | -0.58031500 |
| C | 4.55029900  | -0.50561400 | 0.61384600  |
| C | 4.44985800  | 1.01016600  | 0.90639200  |
| H | 4.13072800  | -0.60155200 | -1.53444700 |
| H | 4.17710800  | -1.08125300 | 1.46657000  |
| H | 5.56470600  | -0.84562600 | 0.39653700  |
| H | 4.54356000  | 1.27375100  | 1.96241100  |
| H | 5.19181100  | 1.59345300  | 0.34592300  |
| N | 2.65094300  | 0.41571100  | -0.44341100 |

|    |             |             |             |
|----|-------------|-------------|-------------|
| O  | 2.36200700  | 2.35073700  | 0.74154100  |
| C  | 2.80907100  | -2.01839900 | -0.64738500 |
| O  | 3.36107000  | -3.08238700 | -0.42163200 |
| O  | 1.54381500  | -1.90339700 | -1.00812800 |
| Pd | 0.76515600  | -0.00829700 | -0.79689700 |
| C  | -2.00836200 | -0.96005000 | -0.06875800 |
| C  | -3.31850100 | -1.43896700 | -0.26820400 |
| C  | -1.67746100 | -0.73886500 | -2.37278300 |
| C  | -3.77013400 | -1.57105200 | -1.58217400 |
| C  | -2.94957500 | -1.21753600 | -2.65100700 |
| H  | -0.98634400 | -0.44592300 | -3.15435100 |
| H  | -4.77729300 | -1.93665200 | -1.76351000 |
| H  | -3.28597300 | -1.30672200 | -3.67783500 |
| N  | -1.21945300 | -0.63241500 | -1.11579700 |
| P  | -0.91785100 | 0.65618300  | 1.89452400  |
| H  | -3.16733600 | 2.41185600  | 0.97301700  |
| N  | -1.46970800 | -0.82923900 | 1.22122700  |
| C  | -1.19013700 | -2.05726500 | 2.01393400  |
| H  | -0.38794700 | -1.78586900 | 2.70496400  |
| H  | -2.06914600 | -2.33112800 | 2.61307100  |
| C  | -4.20175500 | -1.78296200 | 0.89983800  |
| H  | -5.25241300 | -1.81267600 | 0.59740800  |
| H  | -3.94748600 | -2.76452200 | 1.31777000  |
| H  | -4.08655000 | -1.05190500 | 1.70552300  |
| C  | -2.18077700 | 1.05766500  | 3.15410800  |
| O  | 0.44992500  | 0.56432400  | 2.49015000  |
| C  | -0.73508000 | -3.23089700 | 1.15087300  |
| H  | -1.53416700 | -3.58072100 | 0.48716600  |
| H  | 0.12813600  | -2.96085700 | 0.53504900  |
| H  | -0.45615300 | -4.06650900 | 1.80161600  |
| H  | -1.96077100 | 2.03260700  | 3.59852800  |
| H  | -3.19573400 | 1.05902600  | 2.74696600  |
| H  | -2.11849000 | 0.29846200  | 3.93944700  |

## 5. Derivatizations

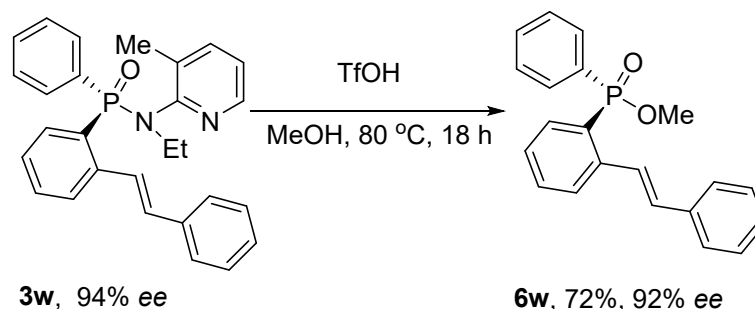

Compound **3w** (43.8 mg, 0.1 mmol) was dissolved in MeOH (1.0 mL), TfOH (0.3 mL) was added slowly into the solution at rt, and then the tube was sealed and heated to 80 °C for 18 h. After being cool to rt, the reaction mixture was diluted with DCM and neutralized with saturated aq. NaHCO<sub>3</sub> (30 mL). The organic layers were washed with brine, dried over anhydrous Na<sub>2</sub>SO<sub>4</sub>, filtered, and concentrated under vacuum. After concentration, the resulting residue was purified by preparative TLC in petroleum ether: ethyl acetate= 3: 1 to give **6w** as yellow foam (24.0 mg, 72%, 88% ee).

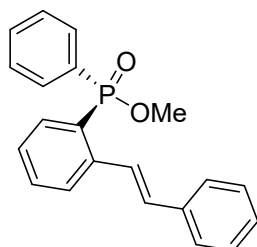

### methyl (*S*, *E*)-phenyl(2-styrylphenyl)phosphinate **6w**

A purification by preparative TLC in petroleum ether: ethyl acetate = 3:1 gave **6w** as a yellow foam (24.0 mg, 72%). The ee value was determined by HPLC analysis on a Chiralcel OD-H column (hexane/isopropanol=70/30, flow = 1.0 mL/min) with t<sub>r</sub> = 7.7 min (minor), 8.4 min (major): 92% ee.

<sup>1</sup>H NMR (400 MHz, CDCl<sub>3</sub>) δ 8.08–7.95(m, 1H), 7.87–7.70(m, 4H), 7.57(t, *J*=7.7 Hz, 1H), 7.52–7.46(m, 1H), 7.46–7.32(m, 7H), 7.30–7.26(m, 1H), 6.93(d, *J*=16.1 Hz, 1H), 3.81(d, *J*=11.1 Hz, 3H).

$^{13}\text{C}$  NMR (101 MHz,  $\text{CDCl}_3$ )  $\delta$  141.4(d,  $J_{c-p} = 10.5$  Hz), 137.1, 133.8(d,  $J_{c-p} = 3.8$  Hz), 132.8(d,  $J_{c-p} = 2.6$  Hz), 132.3(d,  $J_{c-p} = 2.9$  Hz), 131.8, 131.5(d,  $J_{c-p} = 10.4$  Hz), 131.2(d,  $J_{c-p} = 5.9$  Hz), 128.7(d,  $J_{c-p} = 4.6$  Hz), 128.6, 128.2(d,  $J_{c-p} = 132.6$  Hz), 128.1, 127.2(d,  $J_{c-p} = 12.4$  Hz), 126.9, 126.7(d,  $J_{c-p} = 5.3$  Hz), 126.5(d,  $J_{c-p} = 11.8$  Hz), 51.5(d,  $J_{c-p} = 5.9$  Hz).

$^{31}\text{P}$  NMR (162 MHz,  $\text{CDCl}_3$ )  $\delta$  33.79

HRMS (ESI)  $m/z$ :  $[\text{M}+\text{Na}]^+$  Calcd. for  $\text{C}_{21}\text{H}_{20}\text{O}_2\text{P}$ : 335.1195; found: 335.1201.

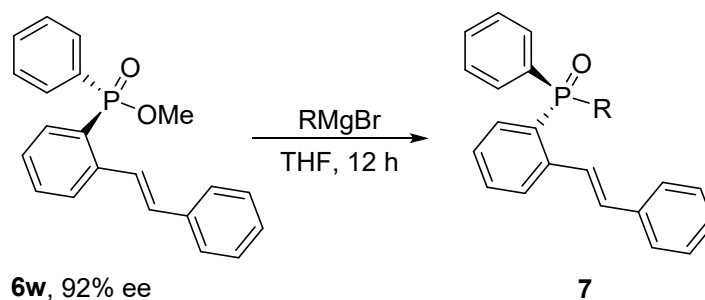

Under nitrogen atm compound **6w** (33.4 mg, 0.1 mmol) was dissolved in dry THF (1.0 mL),  $\text{RMgBr}$  (0.5 mmol, 5.0 equiv) was added slowly into the solution at rt, and then the tube was stirred at rt for 18 h. the reaction mixture was quenched with saturated aq.  $\text{NH}_4\text{Cl}$  and diluted with DCM. The organic layers were washed with brine, dried over anhydrous  $\text{Na}_2\text{SO}_4$ , filtered, and concentrated under vacuum. The residue was purified by preparative TLC using PE/EA as the eluent to afford the alkynylation product **7**.

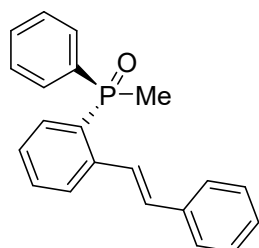

#### (*S*, *E*)-methyl(phenyl)(2-styrylphenyl)phosphine oxide **7a**

A purification by preparative TLC in petroleum ether : ethyl acetate = 3 : 1 gave **7a** as a white foam (20.1 mg, 63%). The *ee* value was determined by HPLC analysis on a

Chiralcel IA column (hexane/isopropanol=70/30, flow = 1.0 mL/min) with  $t_r$  = 8.0 min (minor), 9.2 min (major): 91% *ee*.

**$^1\text{H}$  NMR (400 MHz,  $\text{CDCl}_3$ )**  $\delta$  7.82 – 7.62 (m, 5H), 7.56 – 7.43 (m, 4H), 7.36 – 7.25 (m, 6H), 6.88 (d,  $J$  = 16.1 Hz, 1H), 2.05 (d,  $J$  = 13.1 Hz, 3H).

**$^{13}\text{C}$  NMR (101 MHz,  $\text{CDCl}_3$ )**  $\delta$  141.5 (d,  $J_{\text{c-p}}$  = 7.8 Hz), 136.9, 134.6 (d,  $J_{\text{c-p}}$  = 101.4 Hz), 132.4 (d,  $J_{\text{c-p}}$  = 2.0 Hz), 132.0, 131.89, 131.88 (d,  $J_{\text{c-p}}$  = 4.3 Hz), 131.1 (d,  $J_{\text{c-p}}$  = 98.9 Hz), 130.57 (d,  $J_{\text{c-p}}$  = 10.0 Hz), 128.8 (d,  $J_{\text{c-p}}$  = 12.4 Hz), 128.7, 128.1, 127.1 (d,  $J_{\text{c-p}}$  = 10.5 Hz), 127.0 (d,  $J_{\text{c-p}}$  = 8.3 Hz), 126.8 (d,  $J_{\text{c-p}}$  = 6.0 Hz), 17.3 (d,  $J_{\text{c-p}}$  = 74.6 Hz).

**$^{31}\text{P}$  NMR (162 MHz,  $\text{CDCl}_3$ )**  $\delta$  31.84

**HRMS (ESI)  $m/z$ :**  $[\text{M}+\text{H}]^+$  Calcd. for  $\text{C}_{21}\text{H}_{20}\text{OP}$ : 319.1246; found: 319.1246.

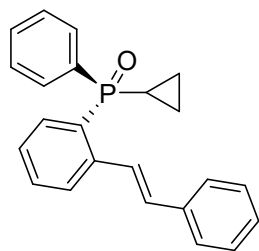

**(*S*, *E*)-cyclopropyl(phenyl)(2-styrylphenyl)phosphine oxide **7b****

A purification by preparative TLC in petroleum ether : ethyl acetate = 3 : 1 gave **7b** as a white foam (25.5 mg, 74%). The *ee* value was determined by HPLC analysis on a Chiralcel IA column (hexane/isopropanol=70/30, flow = 1.0 mL/min) with  $t_r$  = 6.4 min (minor), 8.4 min (major): 89% *ee*.

**$^1\text{H}$  NMR (400 MHz,  $\text{CDCl}_3$ )**  $\delta$  8.03 – 7.92 (m, 1H), 7.77 – 7.70 (m, 3H), 7.67 (d,  $J$  = 16.1 Hz, 1H), 7.54 (t,  $J$  = 7.6 Hz, 1H), 7.48 – 7.36 (m, 4H), 7.28 – 7.26 (m, 4H), 7.24 – 7.19 (m, 1H), 6.87 (d,  $J$  = 16.1 Hz, 1H), 1.37 – 1.28 (m, 1H), 1.20 – 1.09 (m, 2H), 1.03 – 0.93 (m, 2H).

**$^{13}\text{C}$  NMR (101 MHz,  $\text{CDCl}_3$ )**  $\delta$  141.6 (d,  $J_{\text{c-p}}$  = 7.6 Hz), 137.1, 134.8 (d,  $J_{\text{c-p}}$  = 103.3 Hz), 132.6 (d,  $J_{\text{c-p}}$  = 10.2 Hz), 132.2 (d,  $J_{\text{c-p}}$  = 2.3 Hz), 131.7 (d,  $J_{\text{c-p}}$  = 2.8 Hz), 131.5, 131.93 (d,  $J_{\text{c-p}}$  = 101.1 Hz), 130.8 (d,  $J_{\text{c-p}}$  = 9.7 Hz), 128.7 (d,  $J_{\text{c-p}}$  = 11.9 Hz), 128.69,

128.0, 127.2 (d,  $J_{c-p} = 5.8$  Hz), 127.1 (d,  $J_{c-p} = 12.1$  Hz), 126.9, 126.7 (d,  $J_{c-p} = 9.8$  Hz), 7.5 (d,  $J_{c-p} = 106.6$  Hz), 3.6 (d,  $J_{c-p} = 4.1$  Hz), 3.4 (d,  $J_{c-p} = 4.0$  Hz).

$^{31}\text{P}$  NMR (162 MHz,  $\text{CDCl}_3$ )  $\delta$  33.28

HRMS (ESI)  $m/z$ :  $[\text{M}+\text{Na}]^+$  Calcd. for  $\text{C}_{23}\text{H}_{21}\text{NaOP}$ : 367.1222; found: 367.1223.

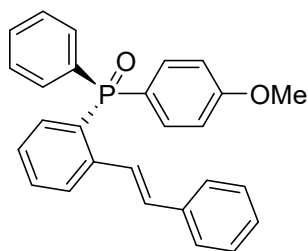

**(*R, E*)-(4-methoxyphenyl)(phenyl)(2-styrylphenyl)phosphine oxide 7c**

A purification by preparative TLC in petroleum ether: ethyl acetate = 3:1 gave **7c** as a yellow foam (29.1 mg, 71%). The *ee* value was determined by HPLC analysis on a Chiralcel AD-H column (hexane/isopropanol=70/30, flow = 1.0 mL/min) with  $t_r = 6.7$  min (minor), 7.4 min (major): 88% *ee*.

$^1\text{H}$  NMR (400 MHz,  $\text{CDCl}_3$ )  $\delta$  7.86 – 7.79 (m, 2H), 7.68 (ddd,  $J = 12.0, 8.1, 1.5$  Hz, 2H), 7.61 (dd,  $J = 11.5, 8.7$  Hz, 2H), 7.53 – 7.41 (m, 4H), 7.26 – 7.18 (m, 7H), 6.95 (dd,  $J = 8.9, 2.3$  Hz, 2H), 6.90 (d,  $J = 16.0$  Hz, 1H), 3.81 (s, 3H).

$^{13}\text{C}$  NMR (101 MHz,  $\text{CDCl}_3$ )  $\delta$  162.5, 142.3 (d,  $J_{c-p} = 7.3$  Hz), 137.2, 133.9 (d,  $J_{c-p} = 11.2$  Hz), 133.8, 133.0, 132.3 (d,  $J_{c-p} = 2.1$  Hz), 132.0 (d,  $J_{c-p} = 9.9$  Hz), 131.8 (d,  $J_{c-p} = 2.7$  Hz), 131.4, 130.7 (d,  $J_{c-p} = 102.1$  Hz), 128.7, 128.6, 127.9, 127.5 (d,  $J_{c-p} = 6.2$  Hz), 127.0, 126.8 (d,  $J_{c-p} = 4.4$  Hz), 126.7, 124.50 (d,  $J_{c-p} = 111.0$  Hz), 114.3 (d,  $J_{c-p} = 13.3$  Hz), 55.4.

$^{31}\text{P}$  NMR (162 MHz,  $\text{CDCl}_3$ )  $\delta$  31.04

HRMS (ESI)  $m/z$ :  $[\text{M}+\text{H}]^+$  Calcd. for  $\text{C}_{27}\text{H}_{24}\text{O}_2\text{P}$ : 411.1508; found: 411.1509.

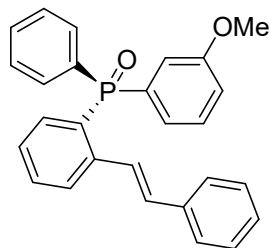

**(*R, E*)- (3-methoxyphenyl)(phenyl)(2-styrylphenyl)phosphine oxide 7d**

A purification by preparative TLC in petroleum ether: ethyl acetate = 3:1 gave **7d** as a yellow foam (27.9 mg, 68%). The *ee* value was determined by HPLC analysis on a Chiralcel IA column (hexane/isopropanol=70/30, flow = 1.0 mL/min) with *tr* = 10.8 min (major), 12.6 min (minor): 90% *ee*.

**<sup>1</sup>H NMR (400 MHz, CDCl<sub>3</sub>)** δ 7.91 (ddd, *J* = 13.4, 7.6, 1.8 Hz, 1H), 7.83 – 7.71 (m, 4H), 7.51 – 7.37 (m, 5H), 7.32 (ddd, *J* = 14.8, 7.7, 1.4 Hz, 1H), 7.26 – 7.17 (m, 6H), 7.12 – 7.05 (m, 1H), 6.91 – 6.83 (m, 2H), 3.51 (s, 3H).

**<sup>13</sup>C NMR (101 MHz, CDCl<sub>3</sub>)** δ 160.7, 141.8 (d, *J*<sub>c-p</sub> = 7.5 Hz), 137.3, 134.7 (d, *J*<sub>c-p</sub> = 7.1 Hz), 134.4 (d, *J*<sub>c-p</sub> = 1.9 Hz), 133.5 (d, *J*<sub>c-p</sub> = 107.5 Hz), 133.3 (d, *J*<sub>c-p</sub> = 12.5 Hz), 132.2 (d, *J*<sub>c-p</sub> = 10.2 Hz), 131.8 (d, *J*<sub>c-p</sub> = 2.4 Hz), 131.6 (d, *J*<sub>c-p</sub> = 2.7 Hz), 131.0, 130.8 (d, *J*<sub>c-p</sub> = 105.9 Hz), 128.5, 128.3 (d, *J*<sub>c-p</sub> = 12.5 Hz), 127.8, 127.7 (d, *J*<sub>c-p</sub> = 6.5 Hz), 126.9, 126.7 (d, *J*<sub>c-p</sub> = 13.2 Hz), 126.3 (d, *J*<sub>c-p</sub> = 10.2 Hz), 121.2 (d, *J*<sub>c-p</sub> = 103.8 Hz), 121.4 (d, *J*<sub>c-p</sub> = 11.5 Hz), 111.6 (d, *J*<sub>c-p</sub> = 6.6 Hz), 55.4.

**<sup>31</sup>P NMR (162 MHz, CDCl<sub>3</sub>)** δ 29.19.04

**HRMS (ESI) m/z:** [M+H]<sup>+</sup> Calcd. for C<sub>27</sub>H<sub>24</sub>O<sub>2</sub>P: 411.1508; found: 411.1508.



## 6. X-Ray Crystallographic Data

A single crystal of **3a** suitable for X-ray crystallography was obtained by crystallization via evaporation from its PE/DCM solution.

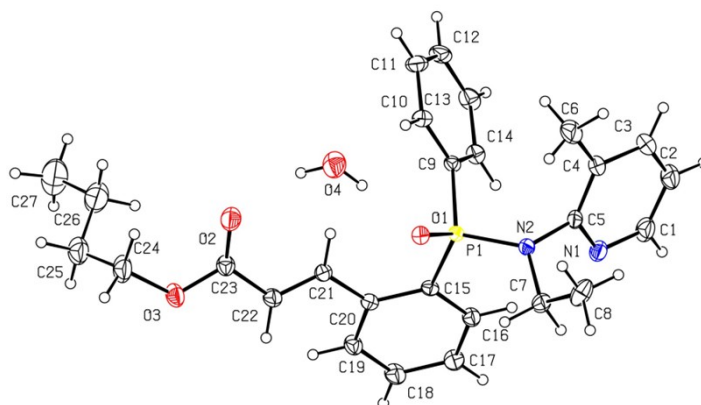

**Figure S3.** X-Ray crystallographic data of **3a**. Thermal ellipsoids are shown at the 30% level.

**Table S4.** Crystal data and structure refinement for **3a**

|                        |                          |                          |              |
|------------------------|--------------------------|--------------------------|--------------|
| Bond precision         | C-C=0.0030 Å             | Wavelength=0.71073       |              |
| Cell                   | a=11.2201(6)             | b=8.4447(5)              | c=13.8792(9) |
|                        | Alpha=90                 | beta=98.303(2)           | gamma=90     |
| Temperature            | 170 K                    |                          |              |
|                        | Calculated               | Reported                 |              |
| Volume                 | 1301.28(13)              | 1301.28(13)              |              |
| Space group            | P 21                     | P 1 21 1                 |              |
| Hall group             | P 2yb                    | P 2yb                    |              |
| Moiety formula         | C27 H31 N2 O3 P,<br>H2 O | C27 H31 N2 O3 P,<br>H2 O |              |
| Sum formula            | C27 H33 N2 O4 P          | C27 H34 N3 O3 P          |              |
| Mr                     | 480.52                   | 479.54                   |              |
| Dx, g cm <sup>-3</sup> | 1.226                    | 1.224                    |              |
| Z                      | 2                        | 2                        |              |
| Mu (mm <sup>-1</sup> ) | 0.140                    | 0.138                    |              |
| F000                   | 512.0                    | 512.0                    |              |
| F000'                  | 512.42                   |                          |              |

|                                                                    |                                 |              |
|--------------------------------------------------------------------|---------------------------------|--------------|
| h, k, lmax                                                         | 14, 10, 17                      | 14, 10, 17   |
| Nref                                                               | 5751[3075]                      | 5734         |
| Tmin, Tmax                                                         | 0.958, 0.969                    | 0.715, 0.746 |
| Tmin'                                                              | 0.942                           |              |
| Radiation type                                                     | MoK $\alpha$                    |              |
| Flack                                                              | 0.016(13)                       |              |
| Correction method = # Reported T Limits: Tmin = 0.715 Tmax = 0.746 |                                 |              |
| AbsCorr=MULTI-SCAN                                                 |                                 |              |
| Data completeness = 1.86/1.00                                      | Theta(max) = 27.127             |              |
| R (reflections) = 0.0309(5659)                                     | wR2(reflections) = 0.0803(5734) |              |
| S=1.076                                                            | Npar=345                        |              |

## 7. References

1. Gaussian 16 Revision A.03, M. J. Frisch, G. W. Trucks, H. B. Schlegel, G. E. Scuseria, M. A. Robb, J. R. Cheeseman, G. Scalmani, V. Barone, G. A. Petersson, H. Nakatsuji, X. Li, M. Caricato, A. V. Marenich, J. Bloino, B. G. Janesko, R. Gomperts, B. Mennucci, H. P. Hratchian, J. V. Ortiz, A. F. Izmaylov, J. L. Sonnenberg, D. Williams-Young, F. Ding, F. Lipparini, F. Egidi, J. Goings, B. Peng, A. Petrone, T. Henderson, D. Ranasinghe, V. G. Zakrzewski, J. Gao, N. Rega, G. Zheng, W. Liang, M. Hada, M. Ehara, K. Toyota, R. Fukuda, J. Hasegawa, M. Ishida, T. Nakajima, Y. Honda, O. Kitao, H. Nakai, T. Vreven, K. Throssell, J. A. Montgomery Jr, J. E. Peralta, F. Ogliaro, M. J. Bearpark, J. J. Heyd, E. N. Brothers, K. N. Kudin, V. N. Staroverov, T. A. Keith, R. Kobayashi, J. Normand, K. Raghavachari, A. P. Rendell, J. C. Burant, S. S. Iyengar, J. Tomasi, M. Cossi, J. M. Millam, M. Klene, C. Adamo, R. Cammi, J. W. Ochterski, R. L. Martin, K. Morokuma, O. Farkas, J. B. Foresman and D. J. Fox, Gaussian, Inc., Wallingford CT, 2016.
2. M. Head-Gordon, J. A. Pople and M. Frisch, *Chem. Phys. Lett.* 1988, **153**, 503.
3. C. Lee, W. Yang and R.G. Parr, *Phys. Rev. B: Condens. Matter Mater. Phys.* 1988, **37**, 785.
4. S. Grimme, J. Antony, S. Ehrlich and H. Krieg, *J. Chem. Phys.* 2010, **132**, 154104.
5. P. J. Hay and W. R. Wadt, *J. Chem. Phys.* 1985, **82**, 299.
6. Y. Zhao and D. G. Truhlar, *J. Chem. Phys.* 2006, **125**, 194101.
7. U. Häussermann, M. Dolg, H. Stoll, H. Preuss, P. Schwerdtfeger and R. M. Pitzer, *Mol. Phys.* 1993, **78**, 1211.
8. W. Küchle, M. Dolg, H. Stoll and H. Preuss, *J. Chem. Phys.* 1994, **100**, 7535.
9. A. V. Marenich, C. J. Cramer and D. G. Truhlar, *J. Phys. Chem. B* 2009, **113**, 6378.
10. T. Lu and F. Chen, *J. Comput. Chem.* 2012, **33**, 580.
11. T. Lu and Q. Chen, *J. Comput. Chem.* 2017, **43**, 539.
12. W. Humphrey, A. Dalke and Schulten, *J. Mol. Graph.* 1996, **14**, 33.
13. CYLview, 1.0b and C. Y. Legault, Université de Sherbrooke, 2009 (<http://www.cylview.org>).

## 8. NMR Spectra

### 3a, $^1\text{H}$ NMR, 400 MHz, $\text{CDCl}_3$

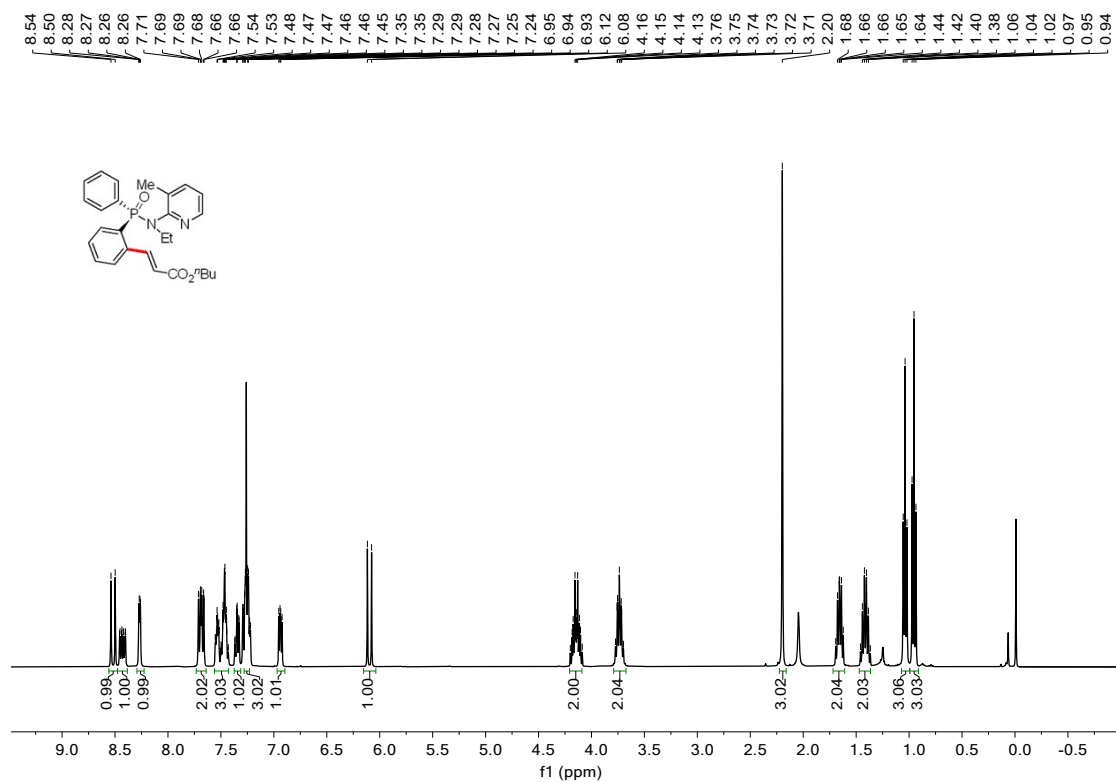

### 3a, $^{13}\text{C}$ NMR, 101 MHz, $\text{CDCl}_3$

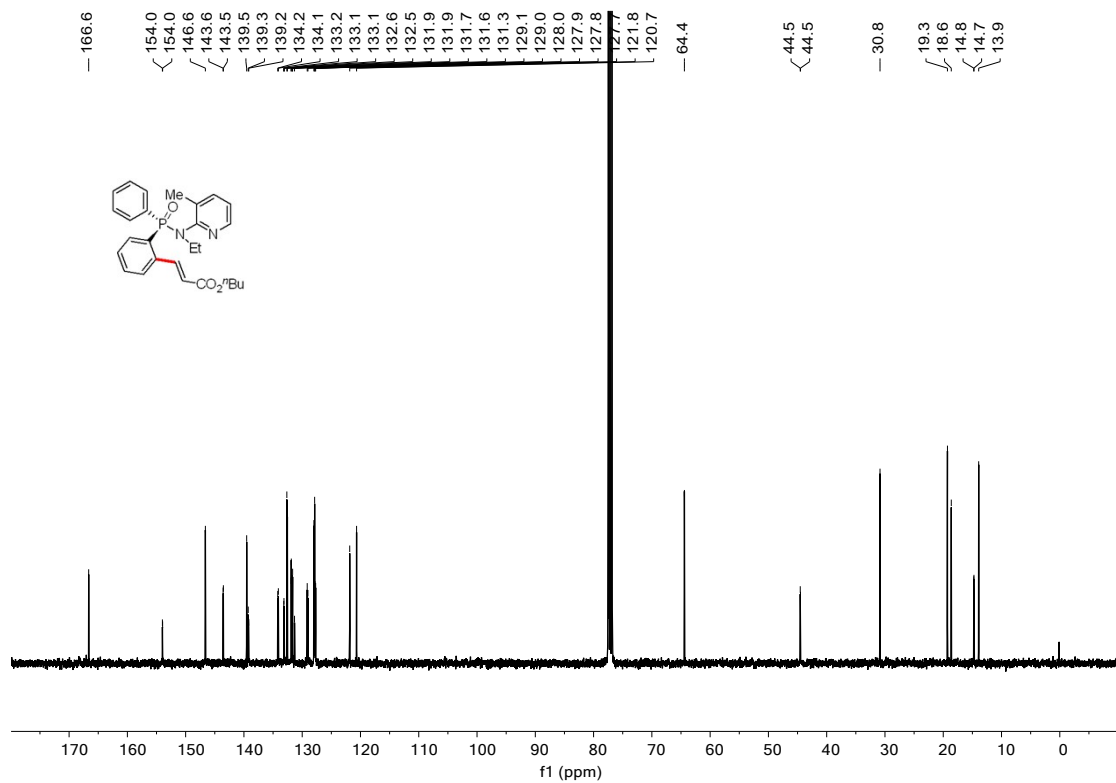

**3a,  $^{31}\text{P}$  NMR, 162 MHz,  $\text{CDCl}_3$**

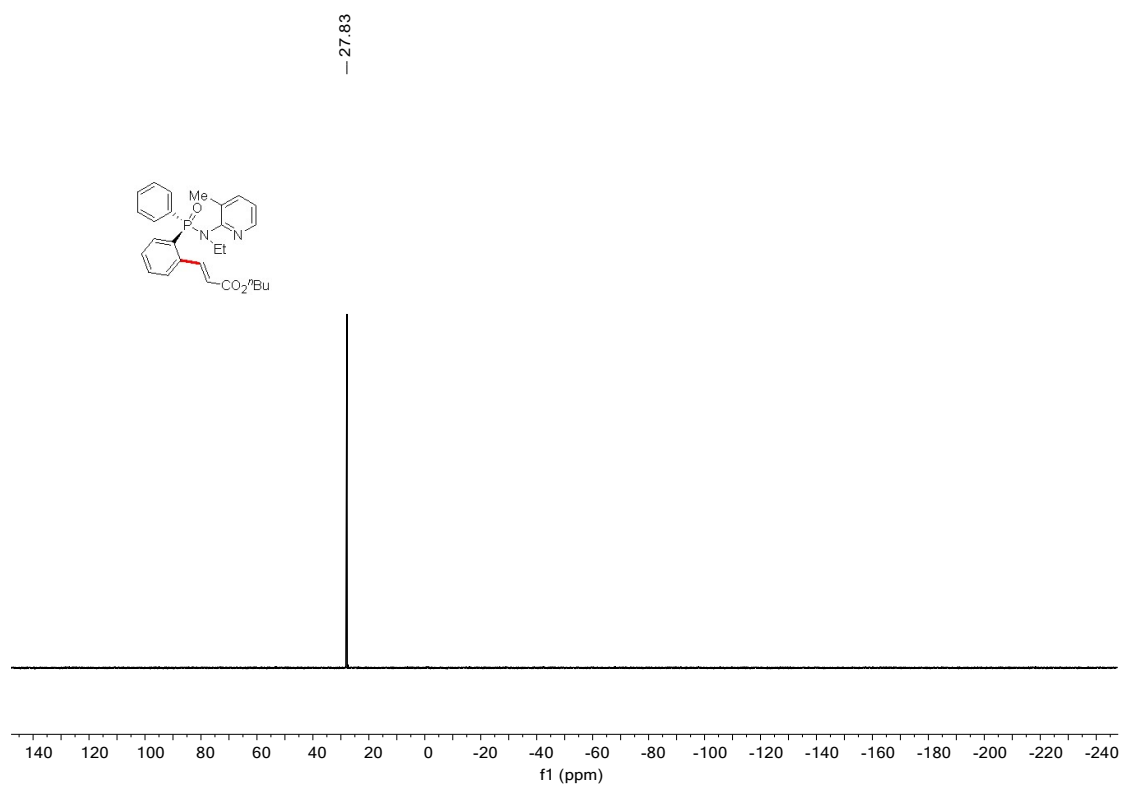

**3b, <sup>1</sup>H NMR, 400 MHz, CDCl<sub>3</sub>**

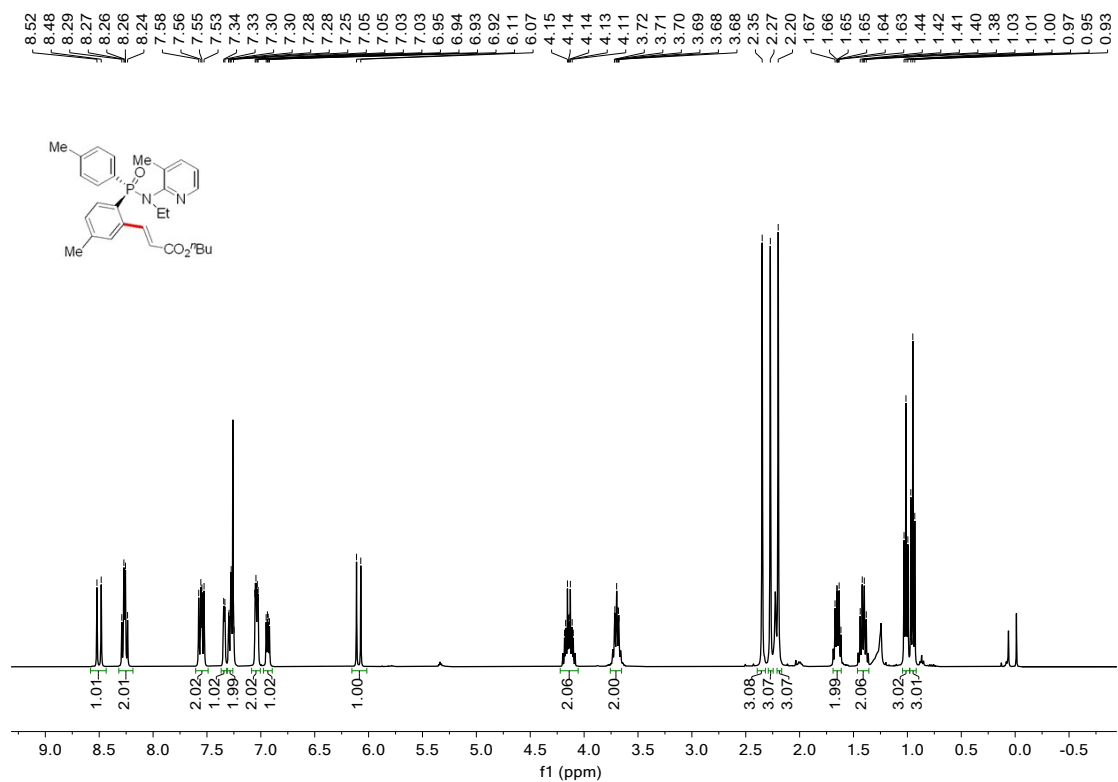

**3b, <sup>13</sup>C NMR, 101 MHz, CDCl<sub>3</sub>**

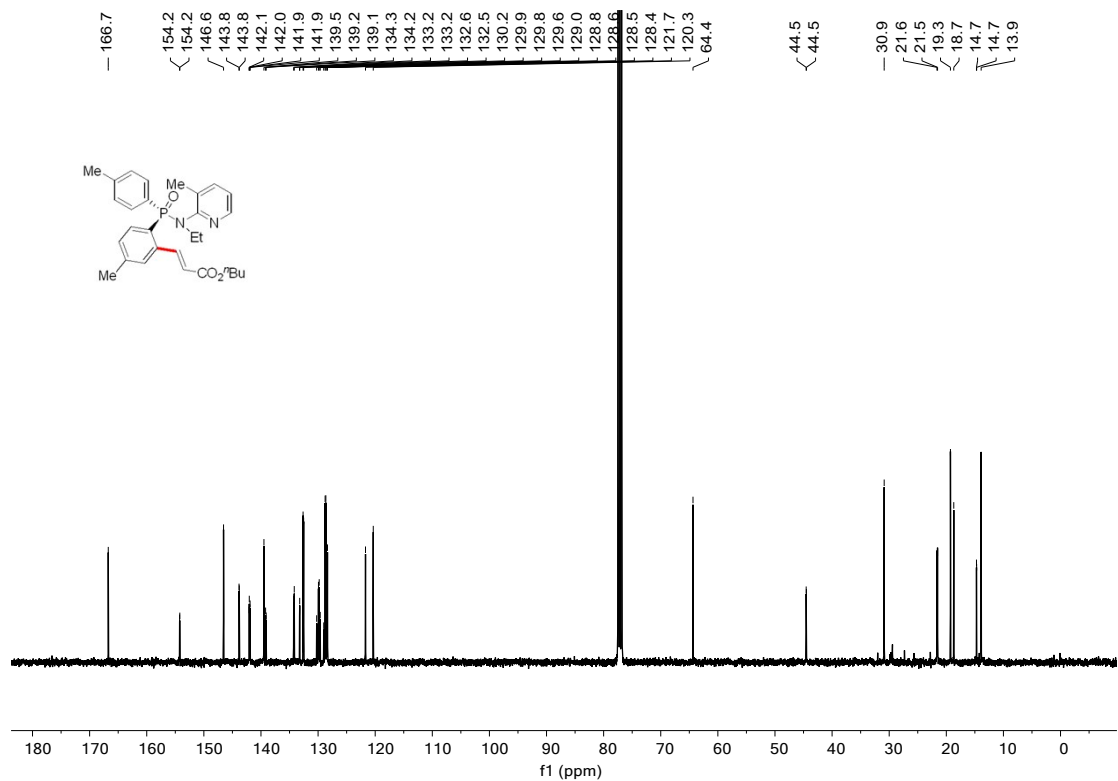

**3b,  $^{31}\text{P}$  NMR, 162 MHz,  $\text{CDCl}_3$**

— 28.18

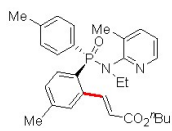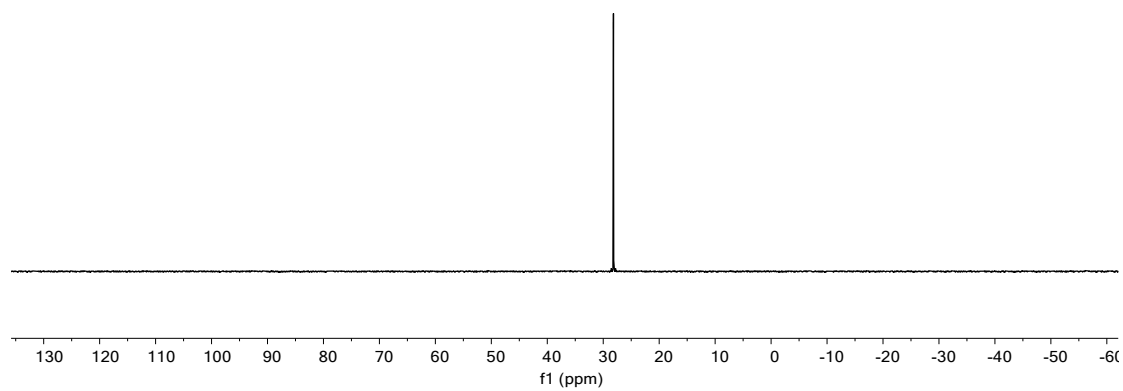

**3c, <sup>1</sup>H NMR, 400 MHz, CDCl<sub>3</sub>**

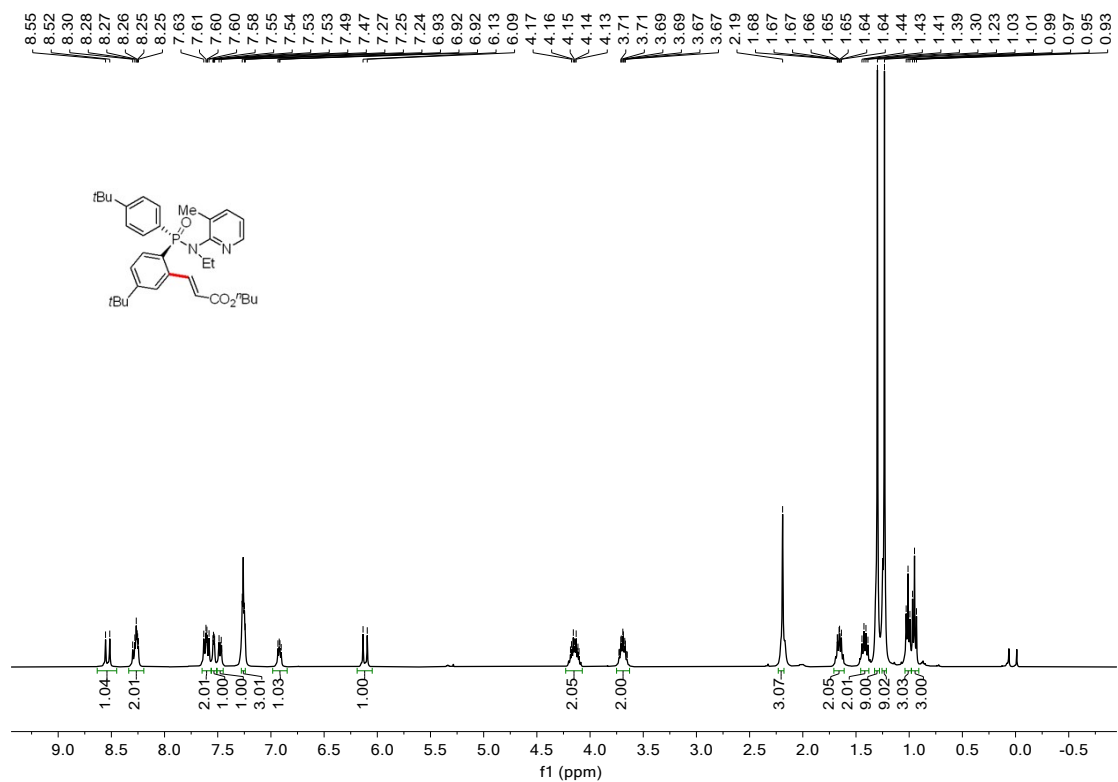

**3c, <sup>13</sup>C NMR, 101 MHz, CDCl<sub>3</sub>**

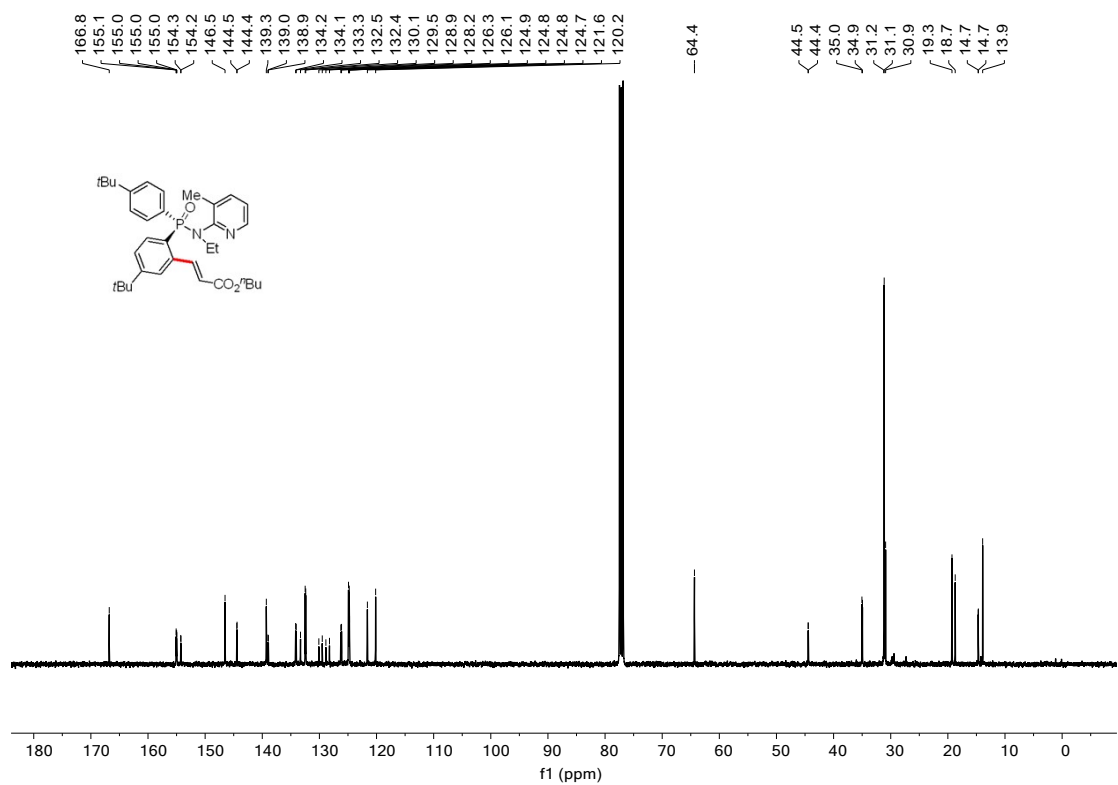



**3c,  $^{31}\text{P}$  NMR, 162 MHz,  $\text{CDCl}_3$**

— 28.13

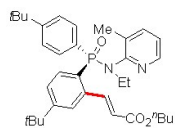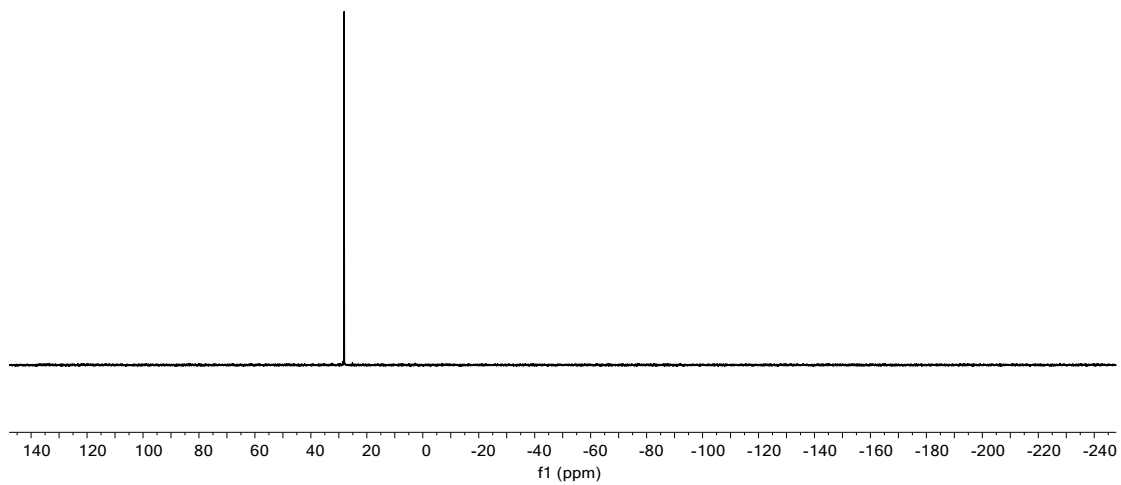

**3d, <sup>1</sup>H NMR, 400 MHz, CDCl<sub>3</sub>**

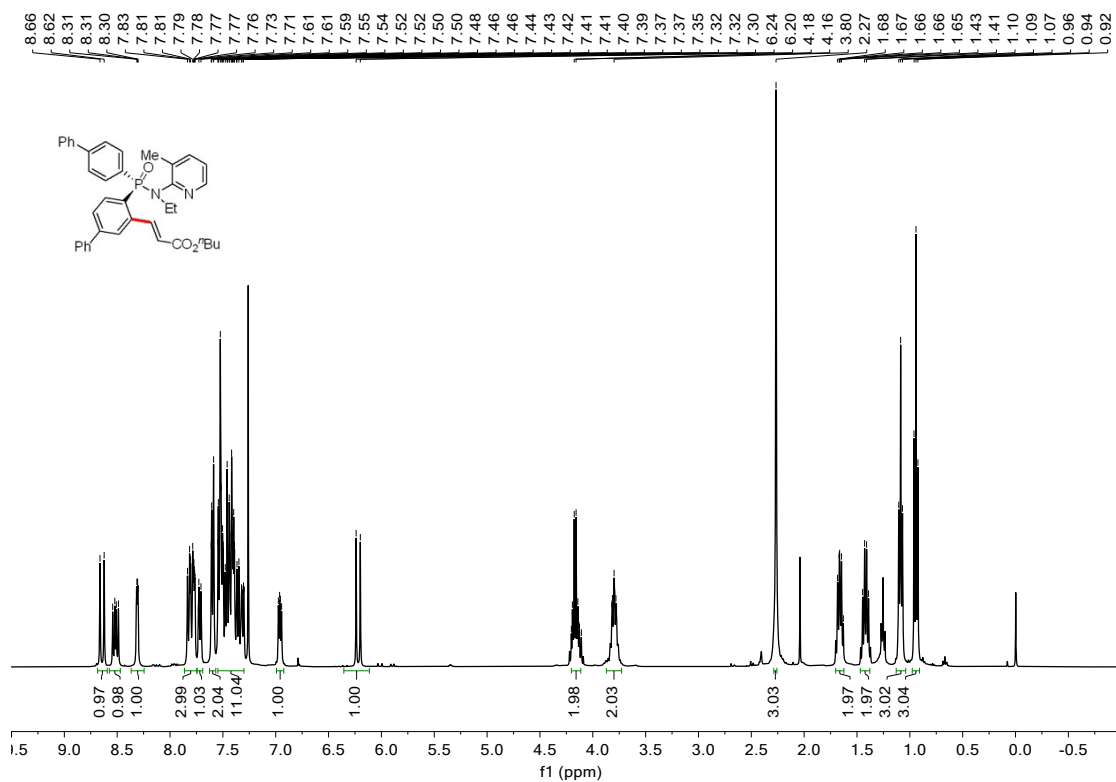

**3d, <sup>13</sup>C NMR, 101 MHz, CDCl<sub>3</sub>**

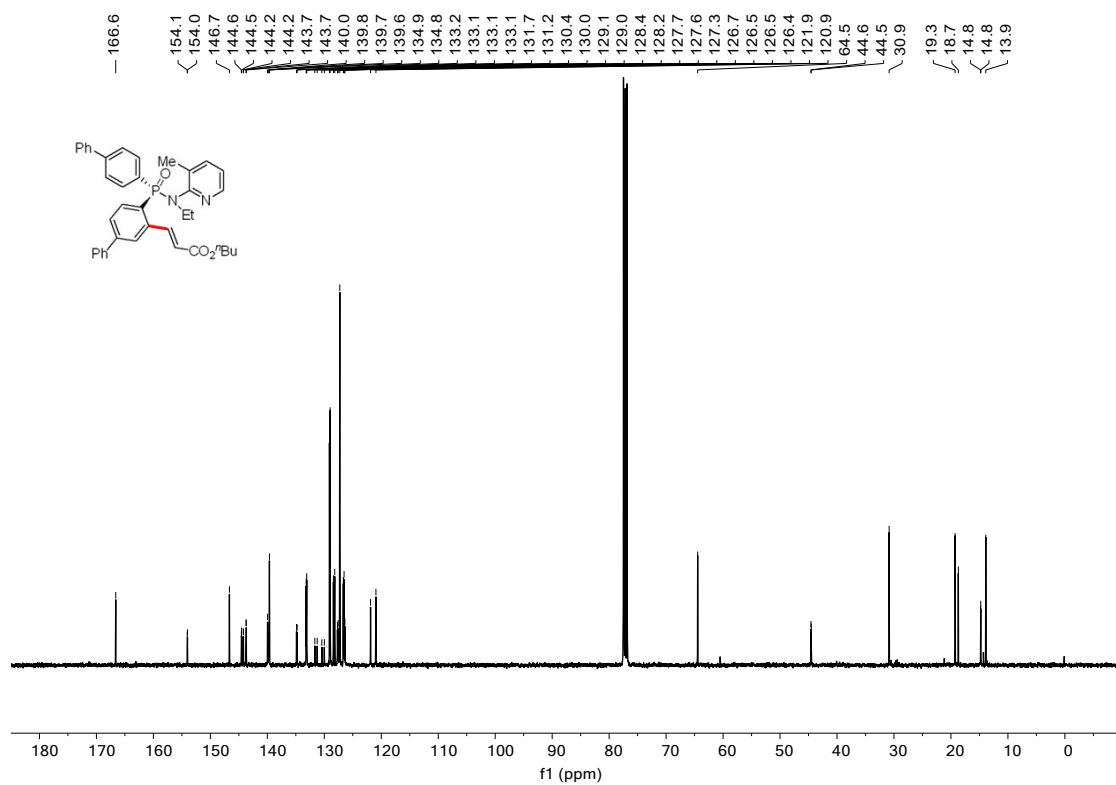

**3d,  $^{31}\text{P}$  NMR, 162 MHz,  $\text{CDCl}_3$**

— 27.47

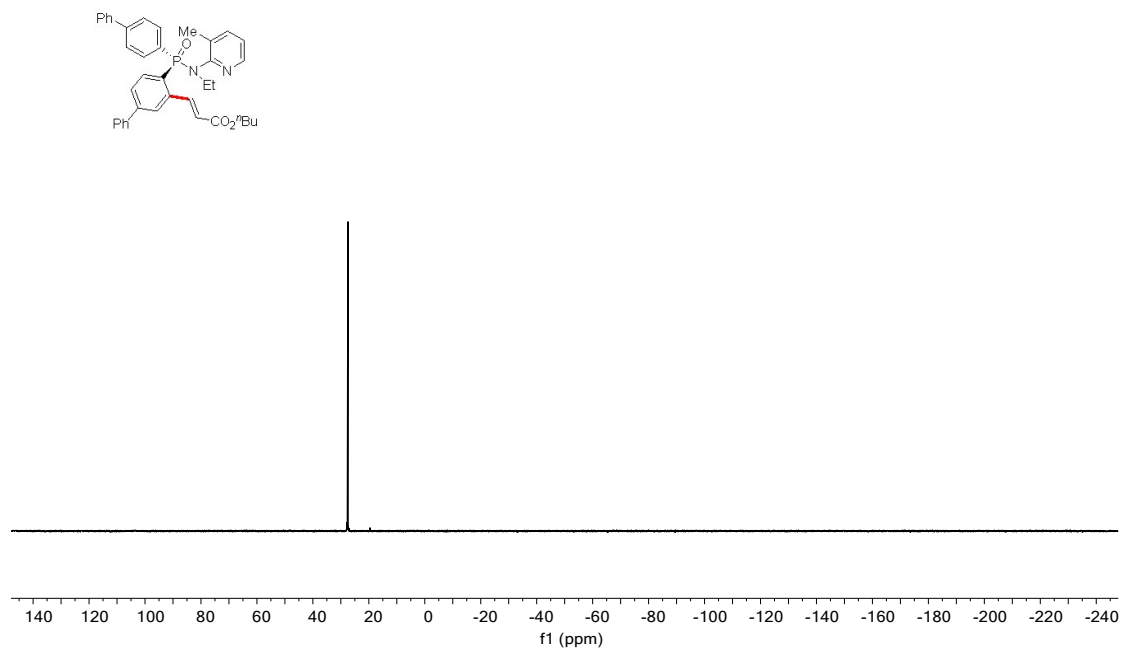

**3e, <sup>1</sup>H NMR, 400 MHz, CDCl<sub>3</sub>**

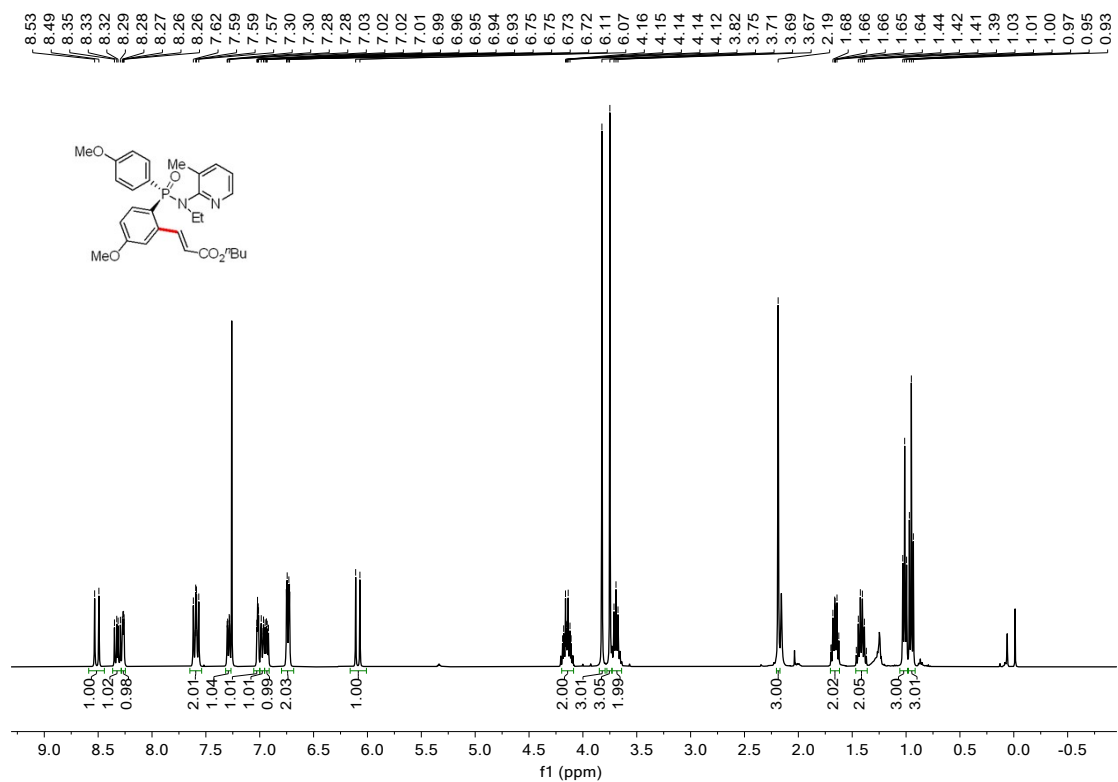

**3e, <sup>13</sup>C NMR, 101 MHz, CDCl<sub>3</sub>**

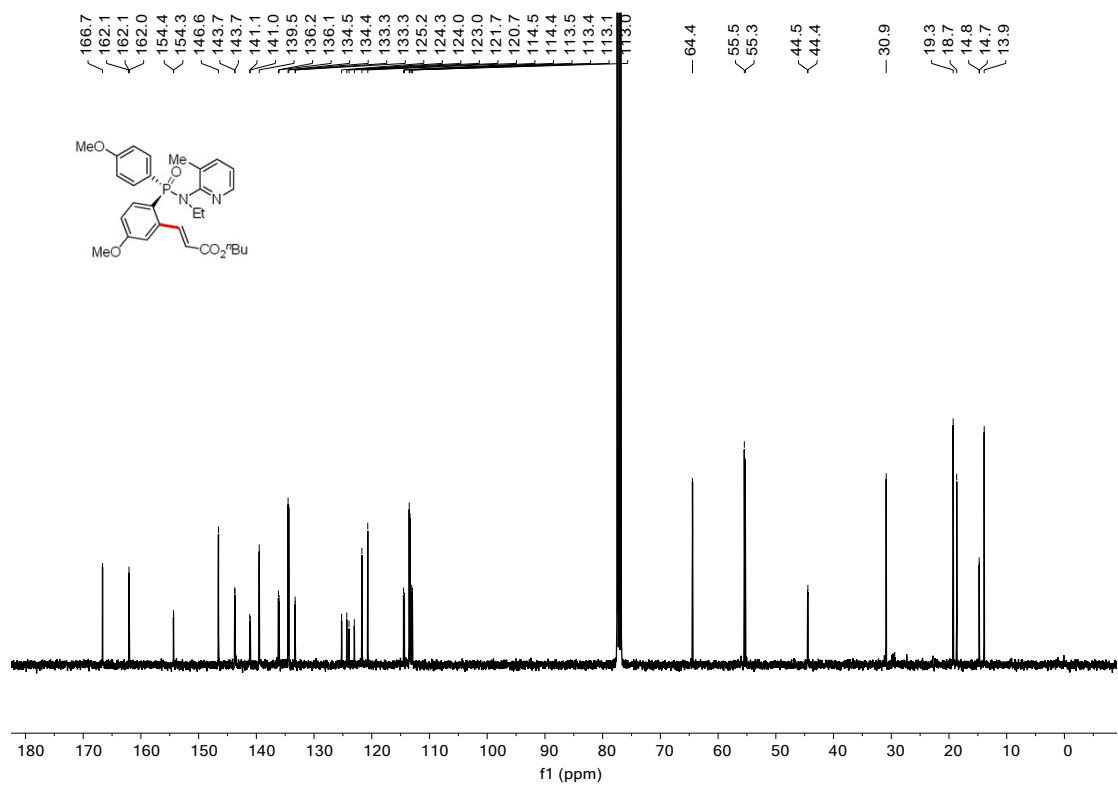

**3e,  $^{31}\text{P}$  NMR, 162 MHz,  $\text{CDCl}_3$**

— 27.67

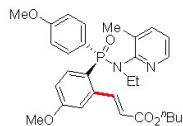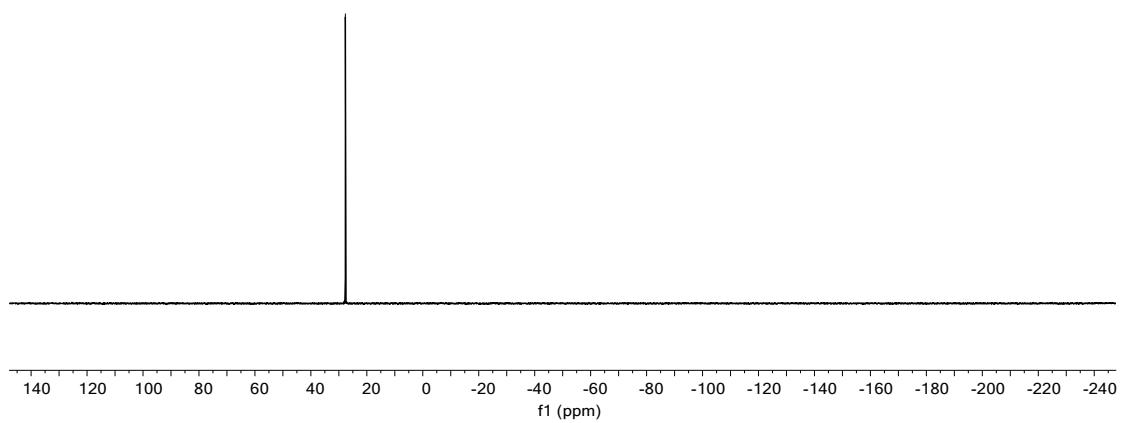

**3f, <sup>1</sup>H NMR, 400 MHz, CDCl<sub>3</sub>**

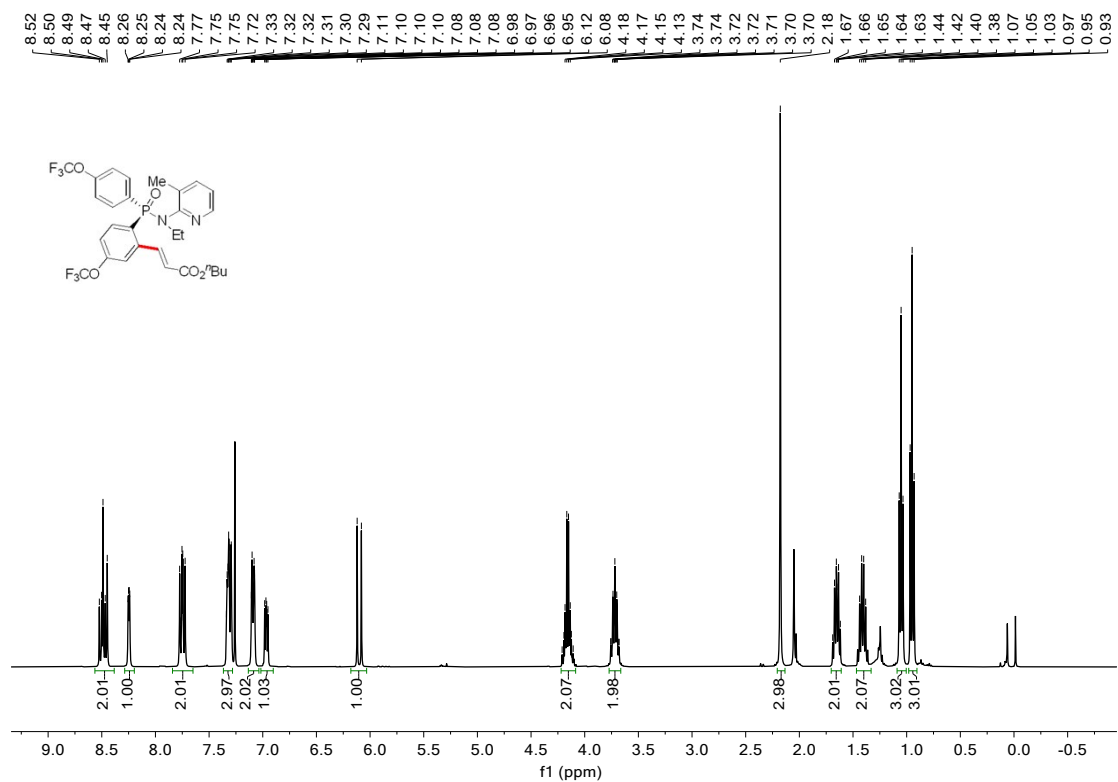

**3f, <sup>13</sup>C NMR, 101 MHz, CDCl<sub>3</sub>**

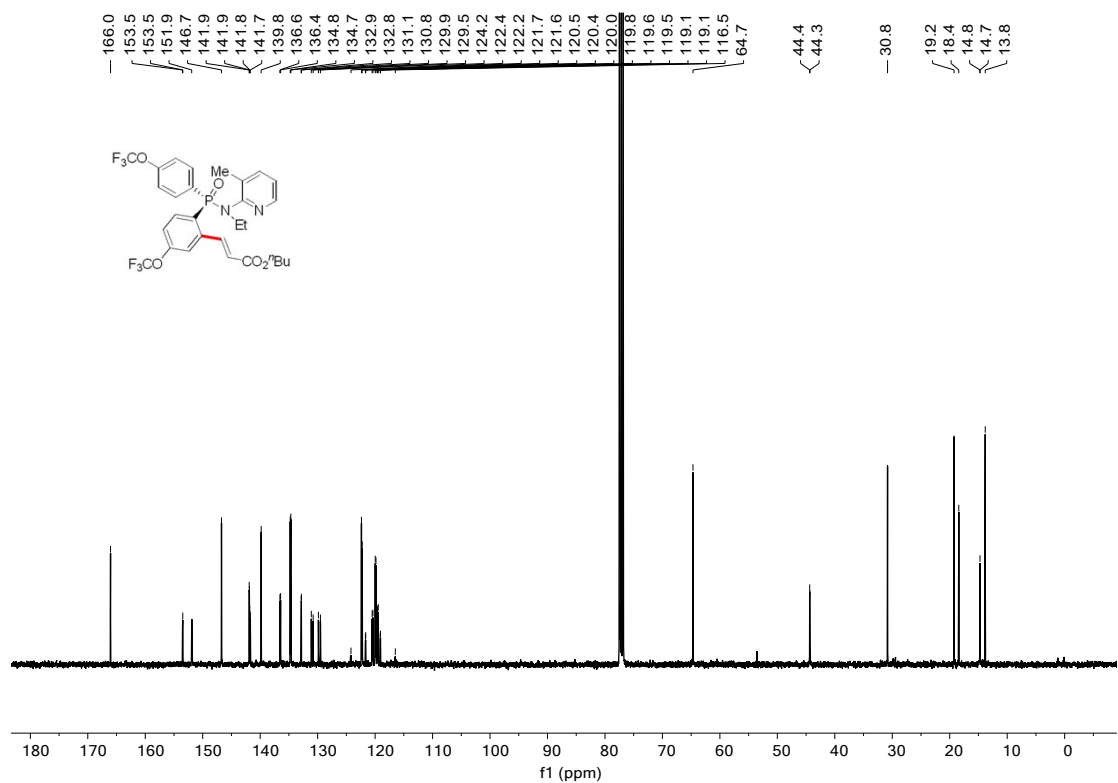

**3f,  $^{31}\text{P}$  NMR, 162 MHz,  $\text{CDCl}_3$**

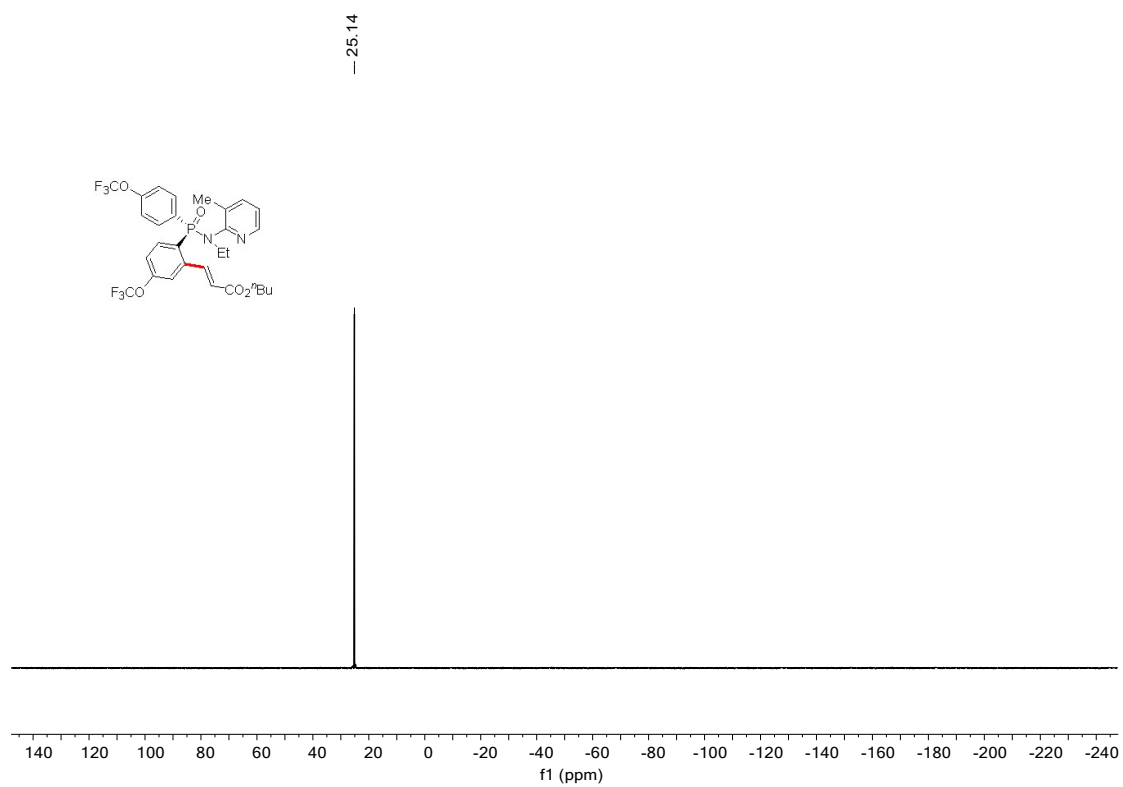

**3f,  $^{19}\text{F}$  NMR, 376 MHz,  $\text{CDCl}_3$**

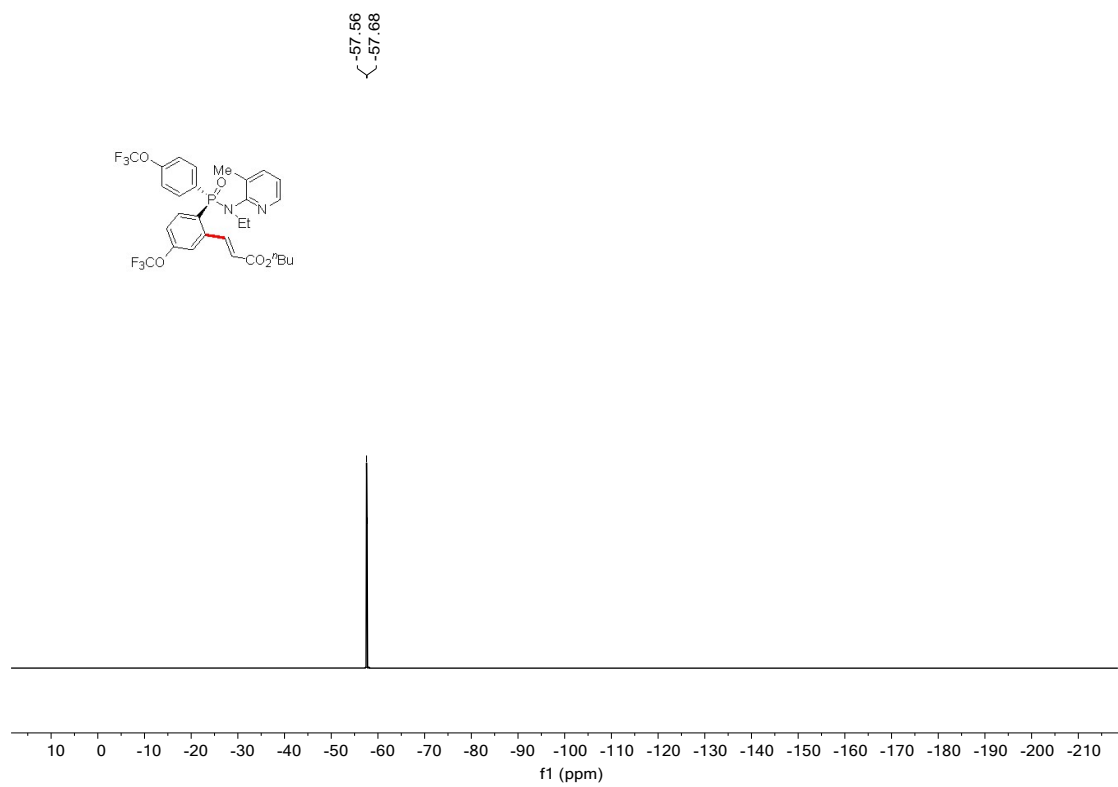

**3g, <sup>1</sup>H NMR, 400 MHz, CDCl<sub>3</sub>**

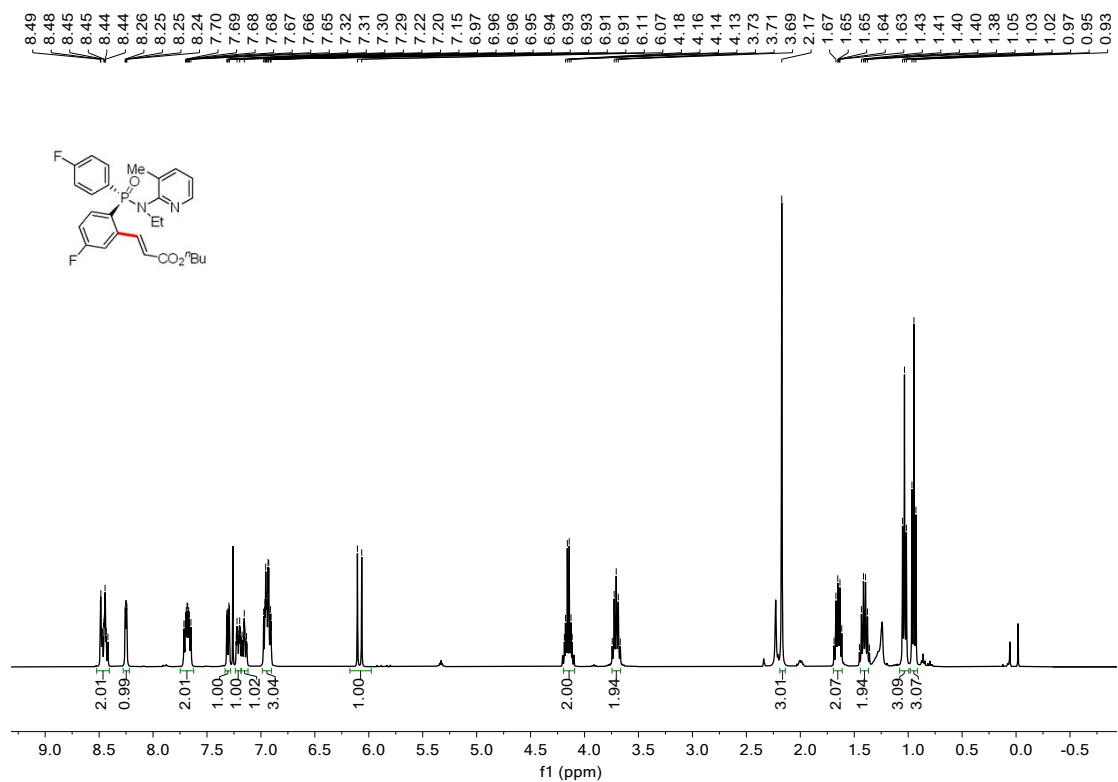

**3g, <sup>13</sup>C NMR, 101 MHz, CDCl<sub>3</sub>**

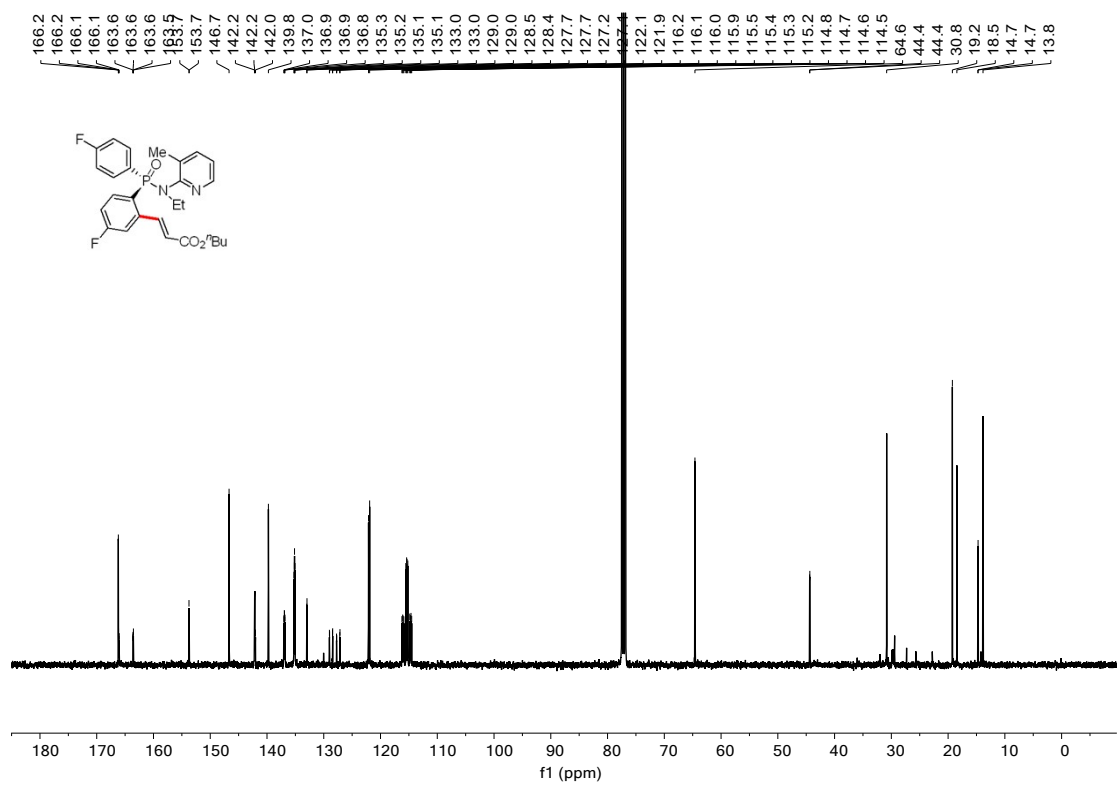



**3g, <sup>31</sup>P NMR, 162 MHz, CDCl<sub>3</sub>**

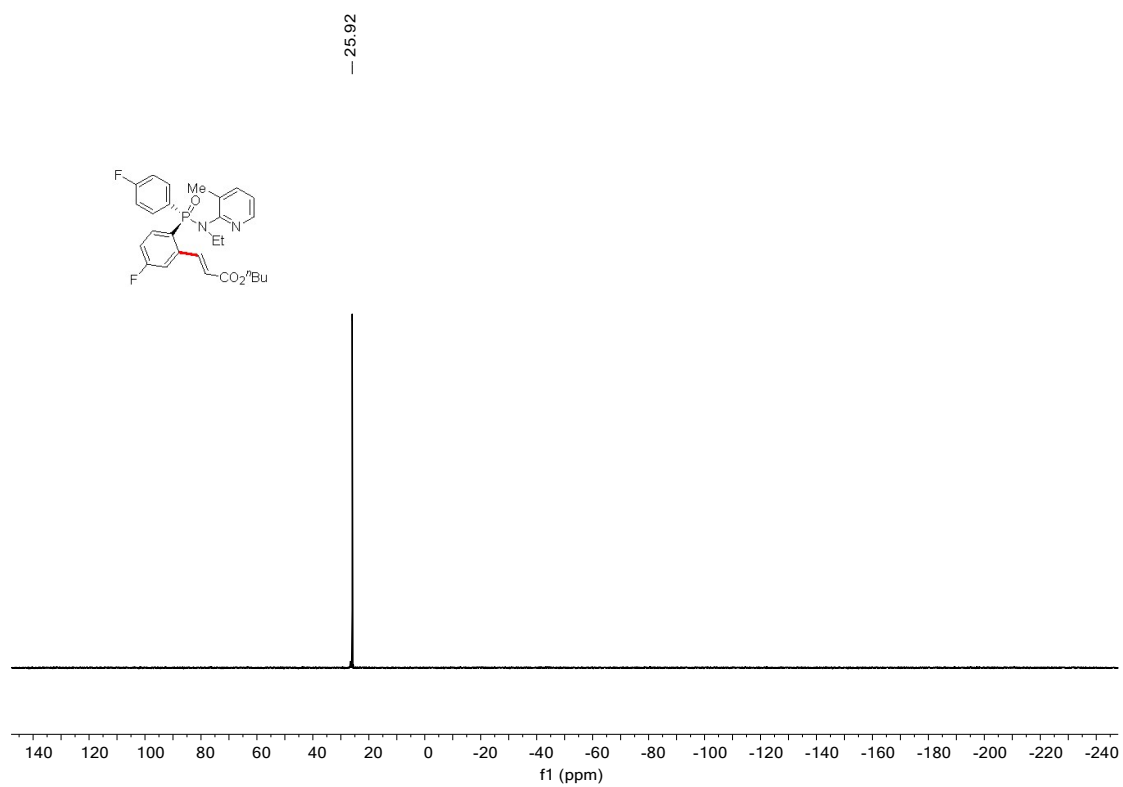

**3g, <sup>19</sup>F NMR, 376 MHz, CDCl<sub>3</sub>**

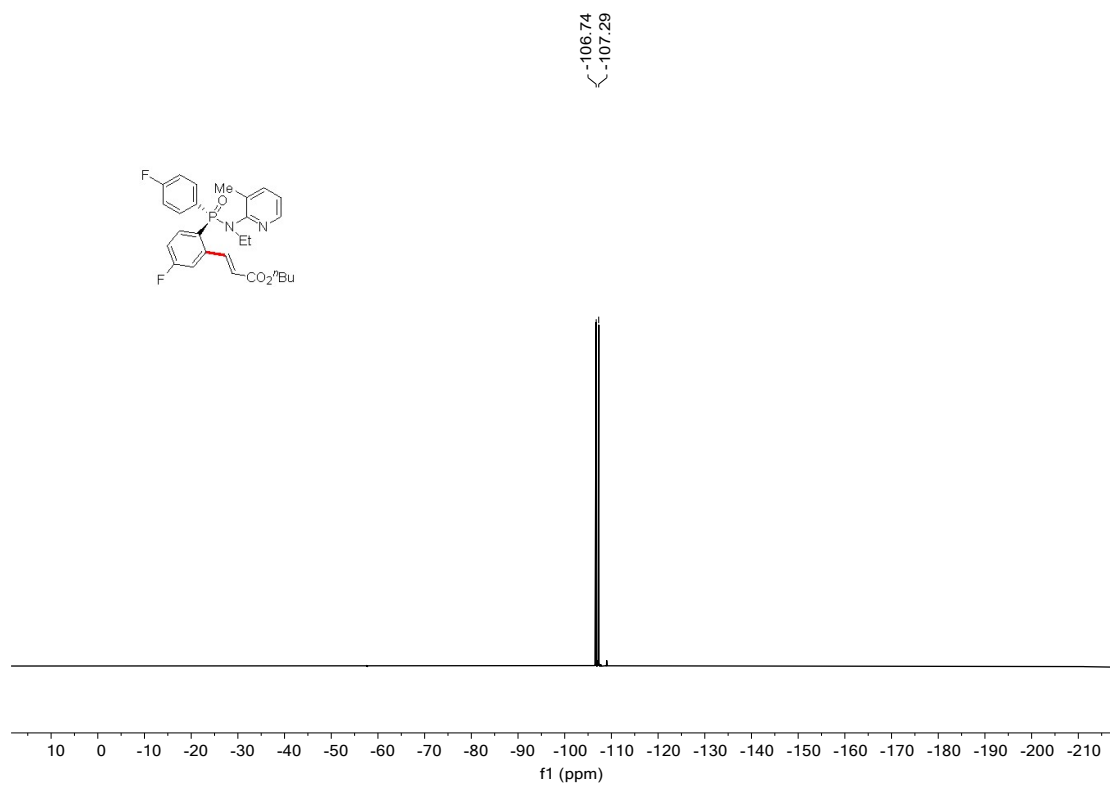

**3h, <sup>1</sup>H NMR, 400 MHz, CDCl<sub>3</sub>**

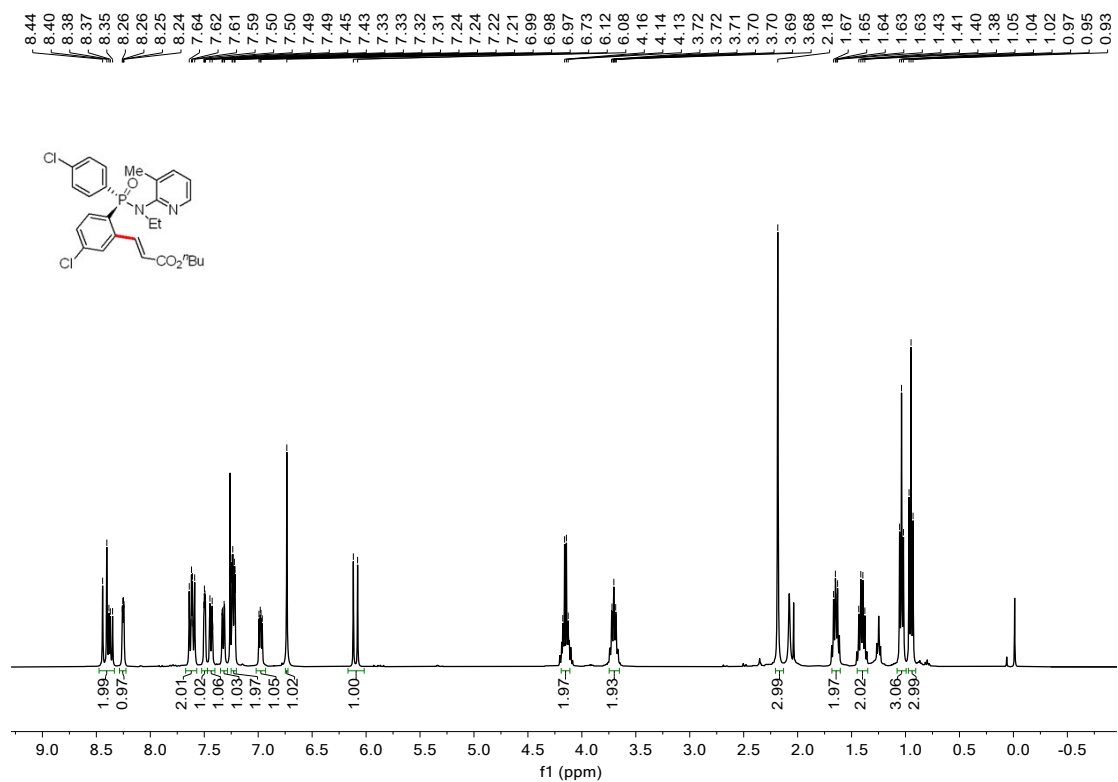

**3h, <sup>13</sup>C NMR, 101 MHz, CDCl<sub>3</sub>**

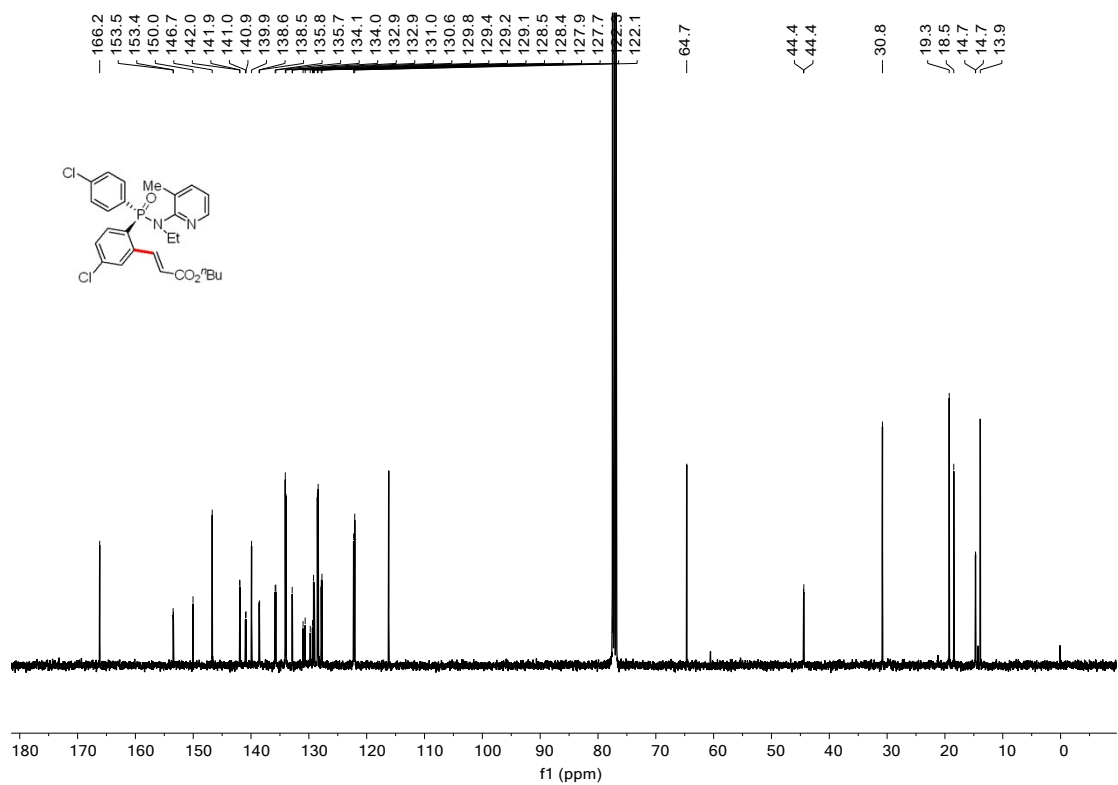

**3h,  $^{31}\text{P}$  NMR, 162 MHz,  $\text{CDCl}_3$**

— 26.13

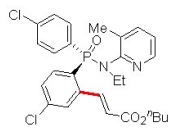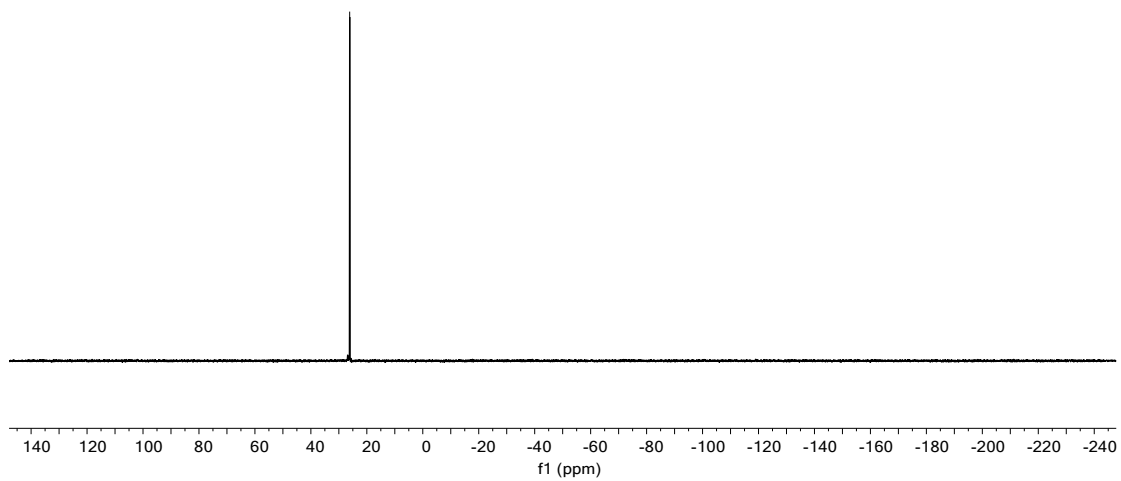

**3i, <sup>1</sup>H NMR, 400 MHz, CDCl<sub>3</sub>**

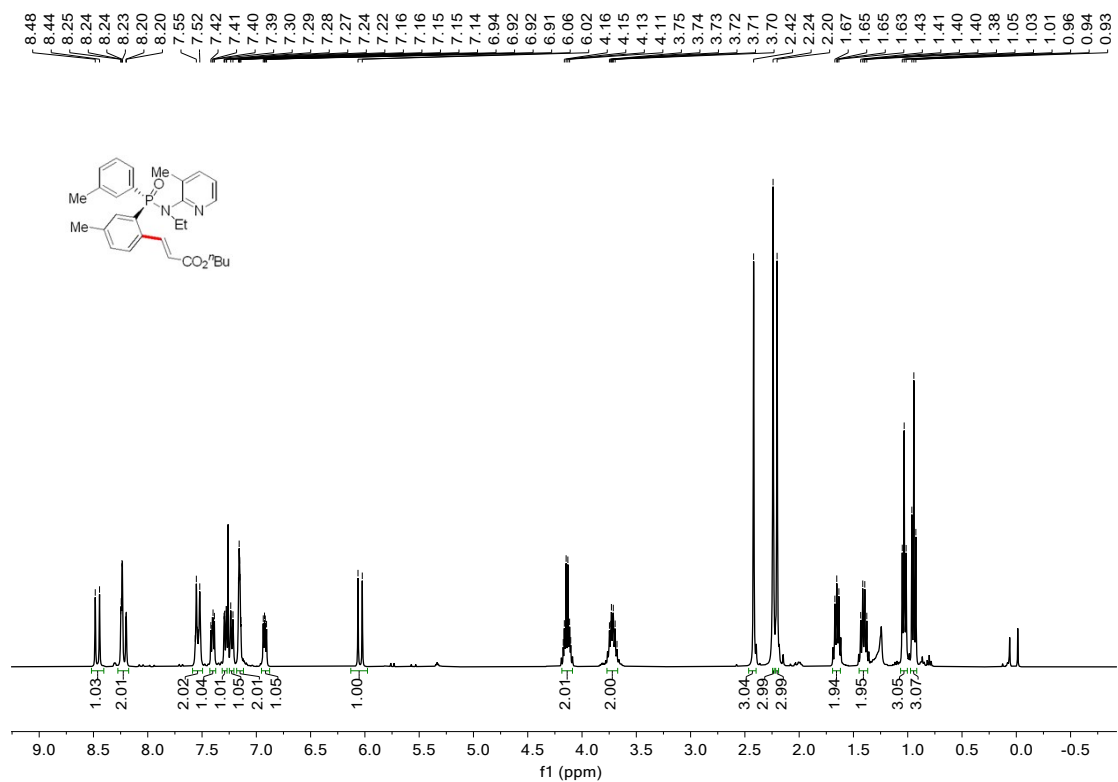

**5i, <sup>13</sup>C NMR, 101 MHz, CDCl<sub>3</sub>**

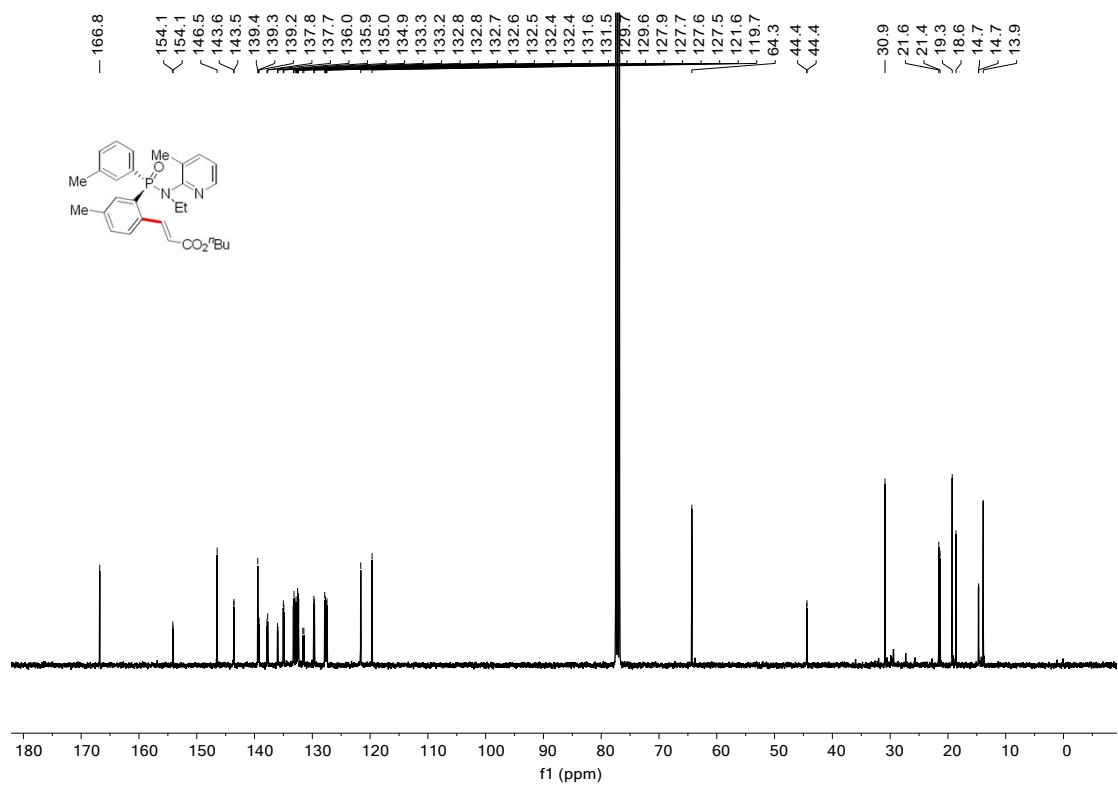

**3i,  $^{31}\text{P}$  NMR, 162 MHz,  $\text{CDCl}_3$**

— 27.91

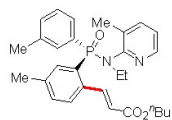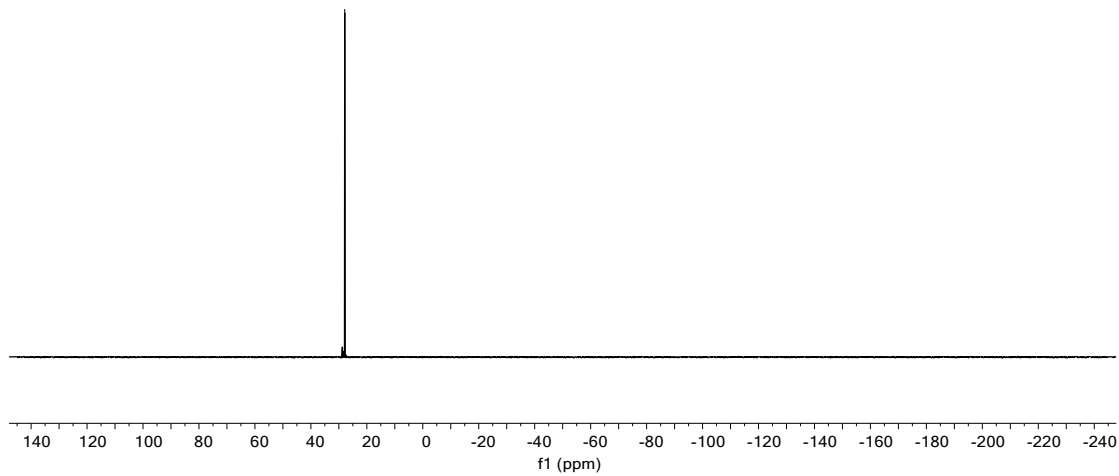

**3j, <sup>1</sup>H NMR, 400 MHz, CDCl<sub>3</sub>**

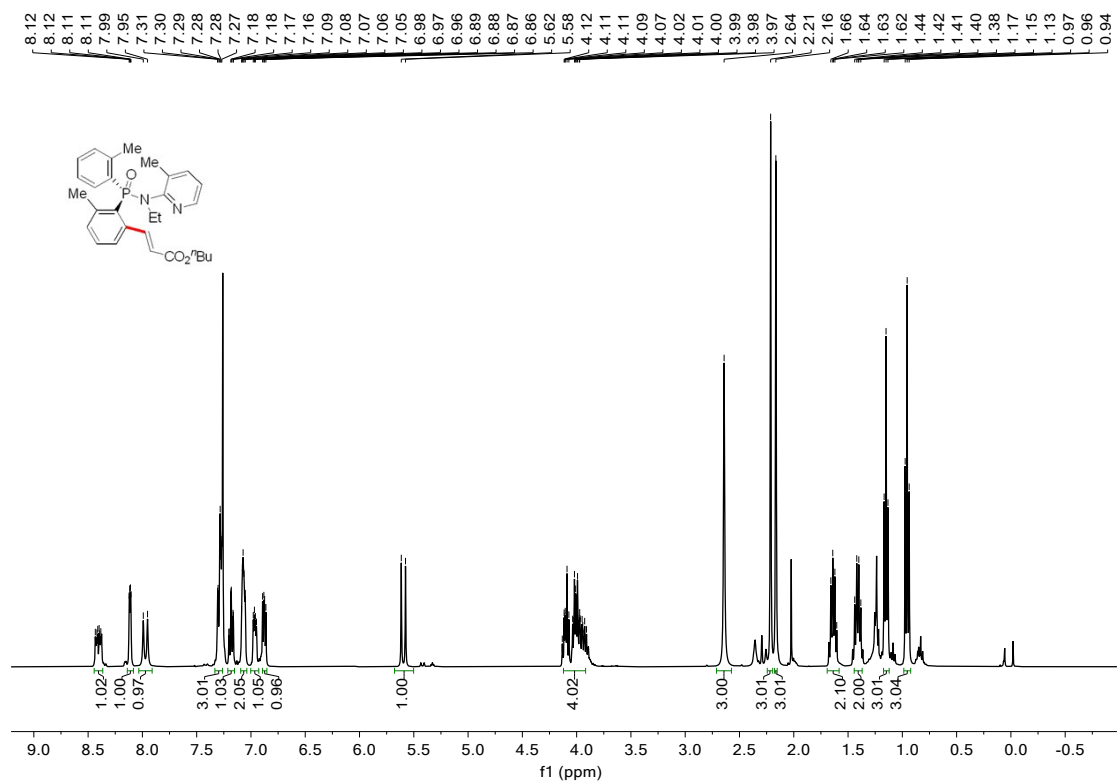

**3j, <sup>13</sup>C NMR, 101 MHz, CDCl<sub>3</sub>**

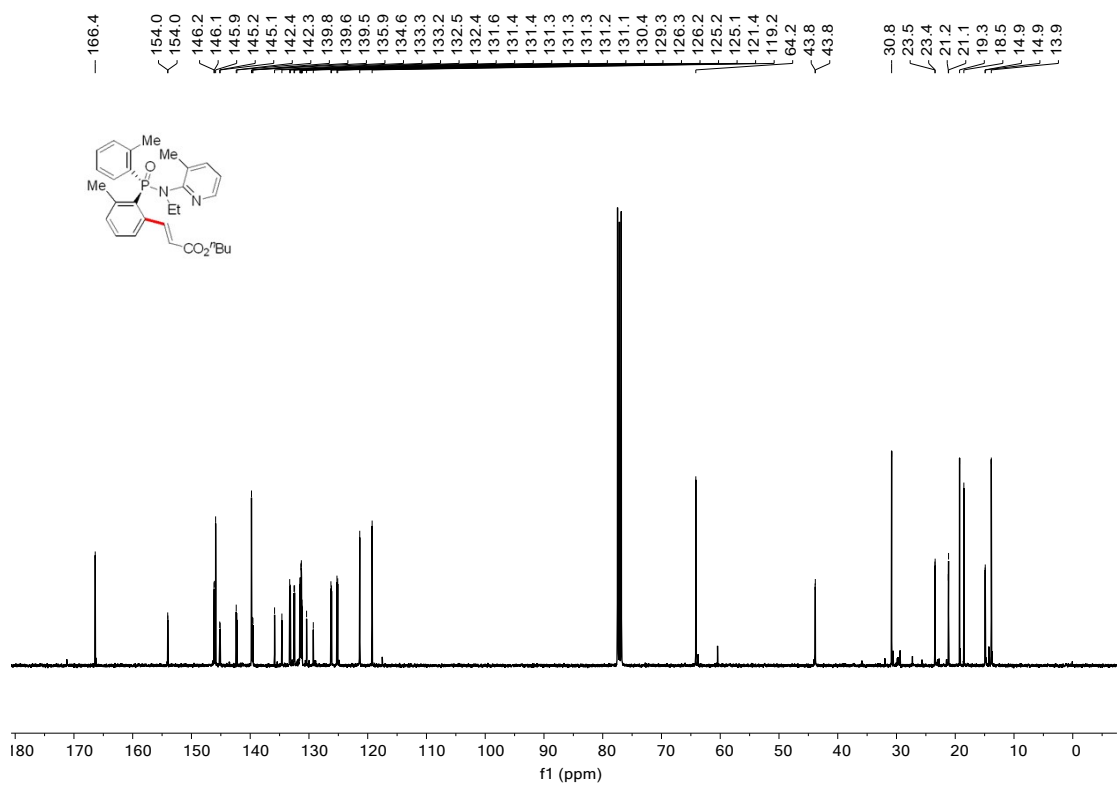

**3j,  $^{31}\text{P}$  NMR, 162 MHz,  $\text{CDCl}_3$**

— 31.59

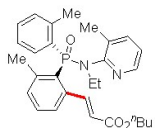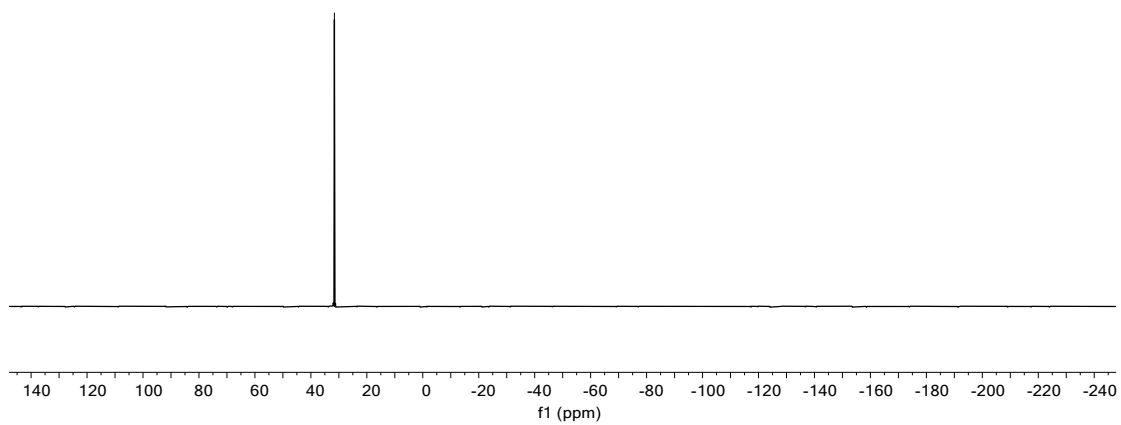

**3k, <sup>1</sup>H NMR, 400 MHz, CDCl<sub>3</sub>**

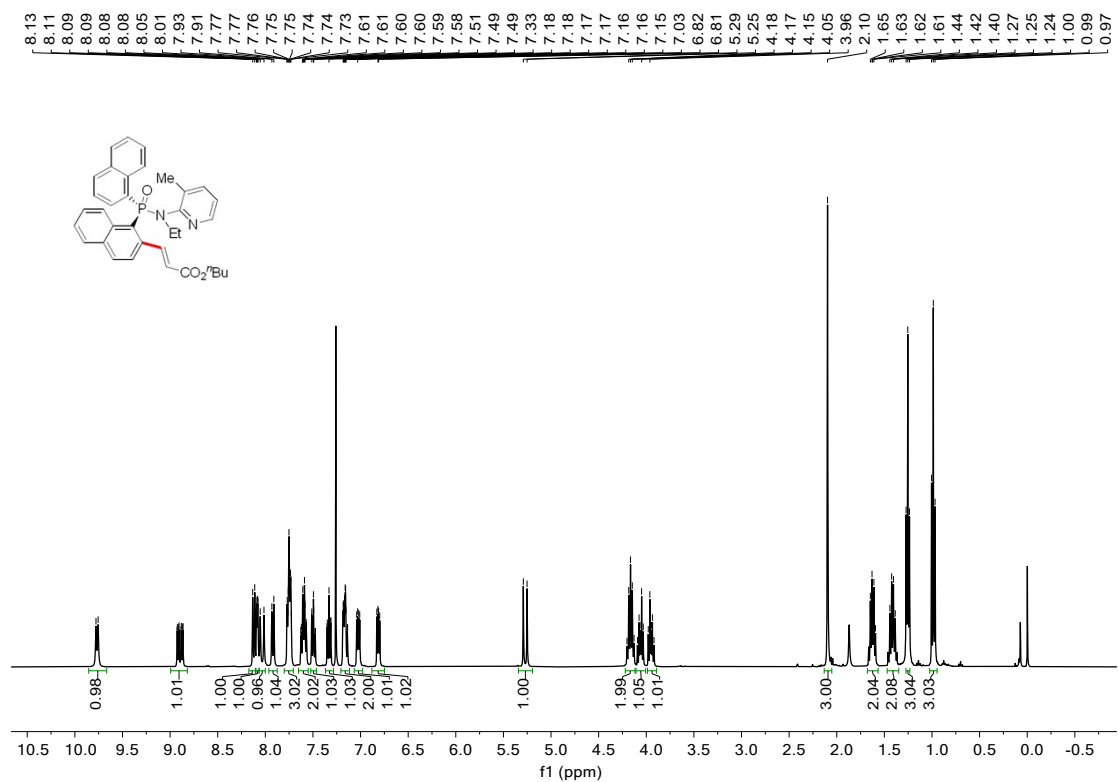

**3k, <sup>13</sup>C NMR, 101 MHz, CDCl<sub>3</sub>**

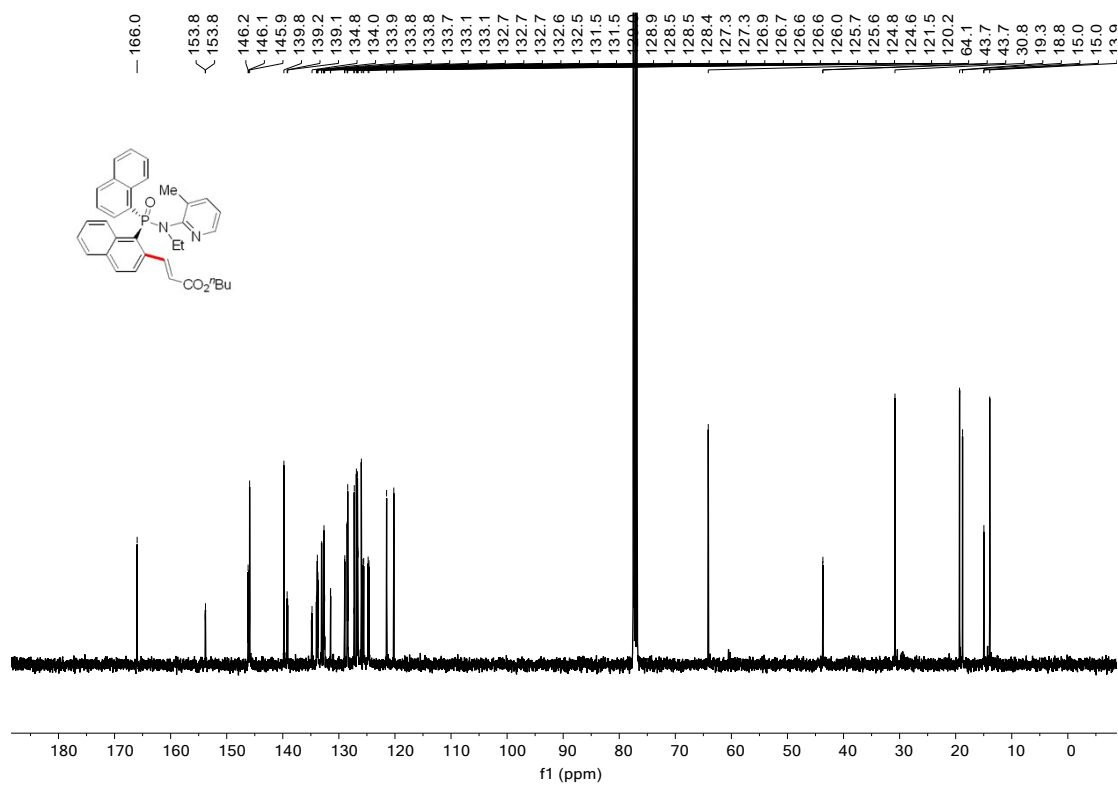



**3k,  $^{31}\text{P}$  NMR, 162 MHz,  $\text{CDCl}_3$**

— 32.52

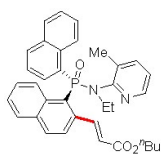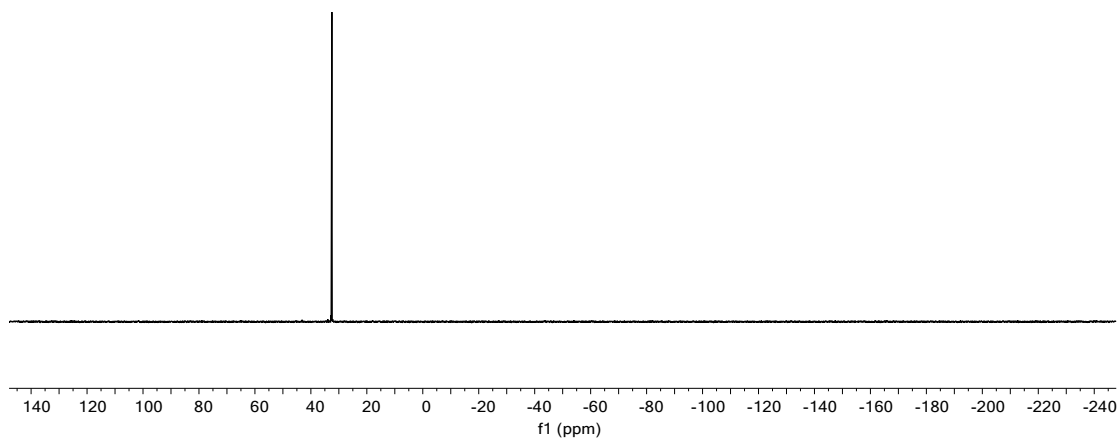

**31, <sup>1</sup>H NMR, 400 MHz, CDCl<sub>3</sub>**

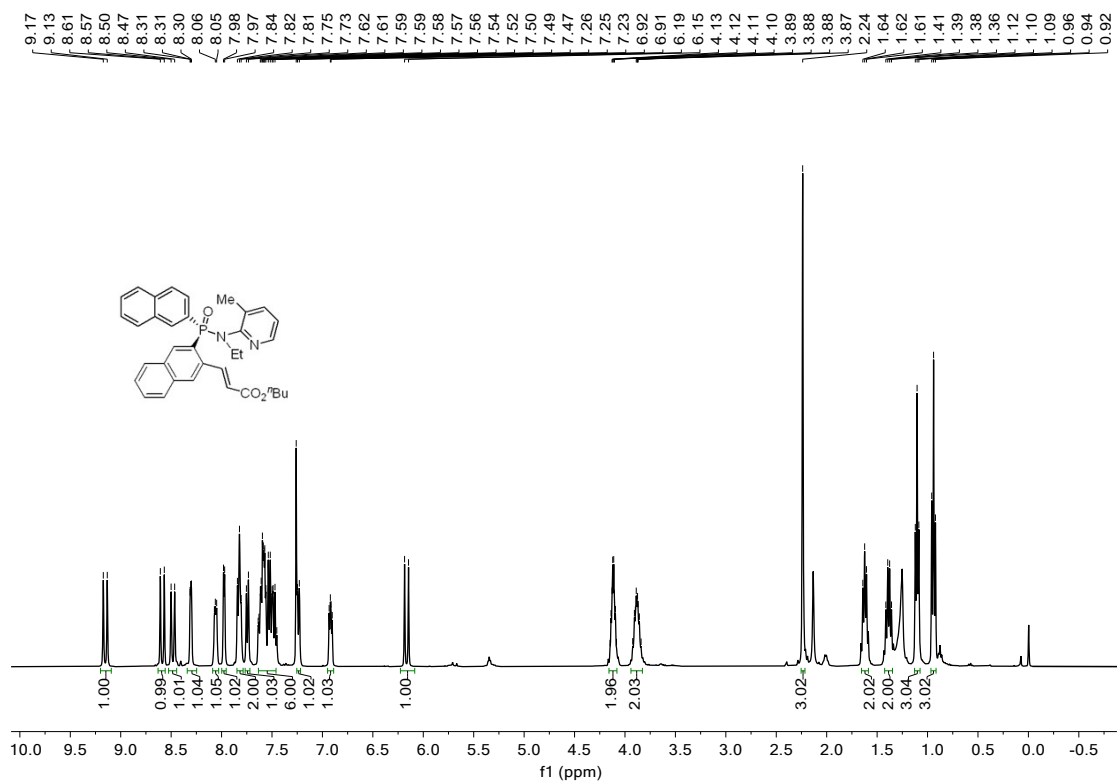

**31, <sup>13</sup>C NMR, 101 MHz, CDCl<sub>3</sub>**

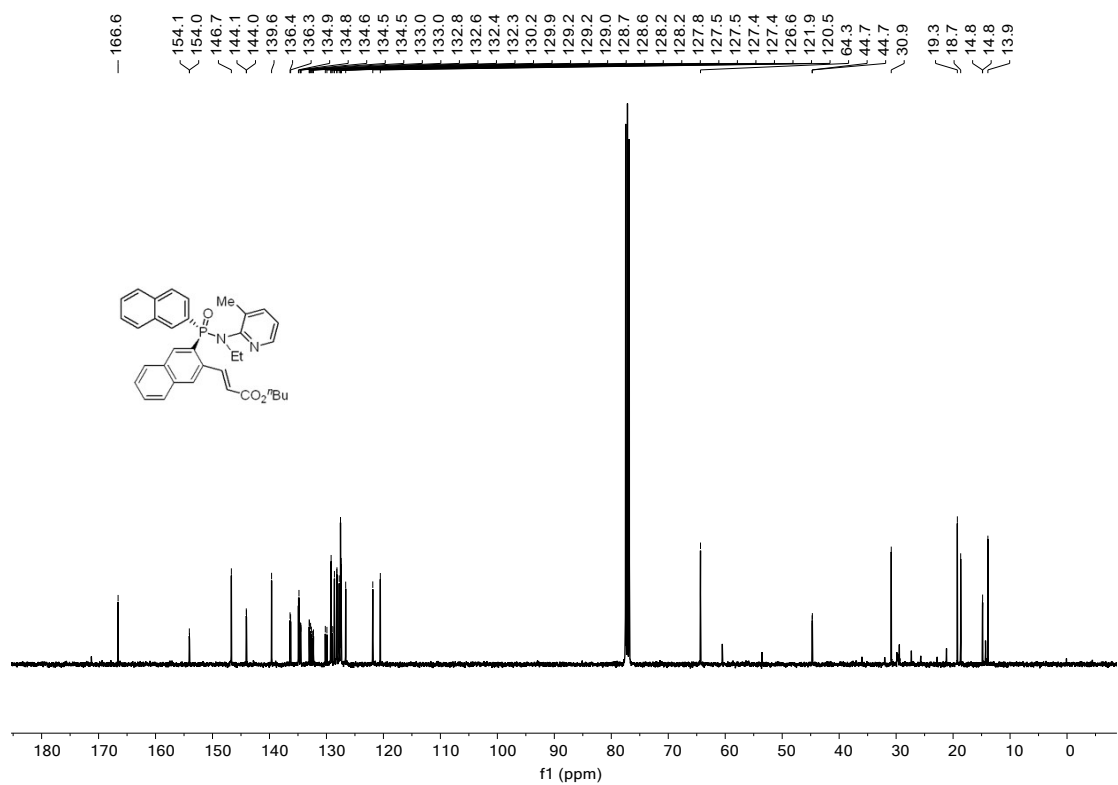

3l,  $^{31}\text{P}$  NMR, 162 MHz,  $\text{CDCl}_3$

— 28.03

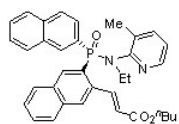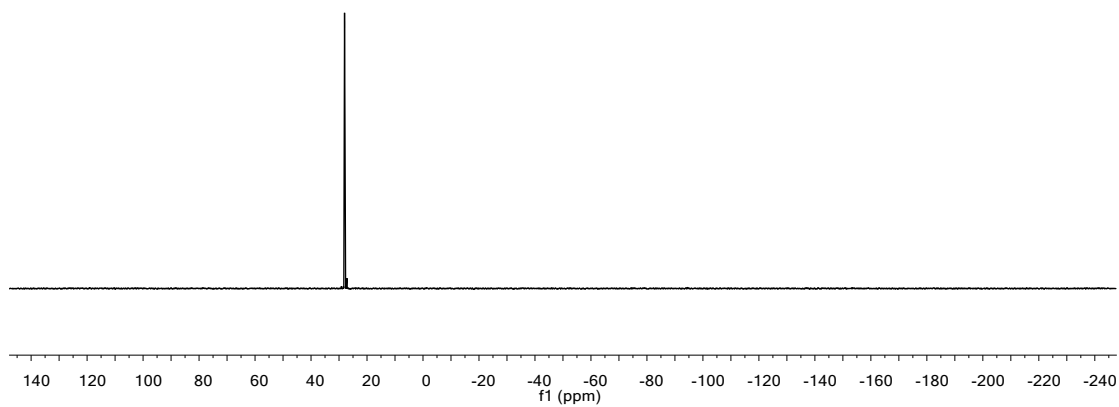

**3m, <sup>1</sup>H NMR, 400 MHz, CDCl<sub>3</sub>**

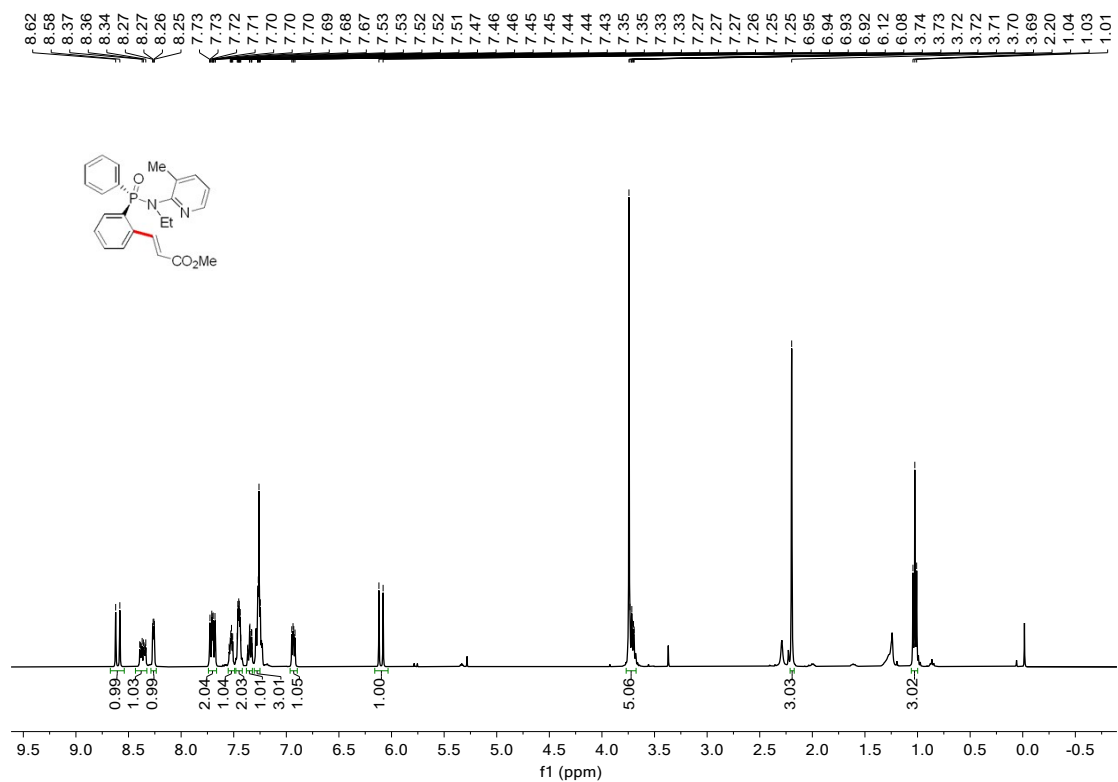

**3m, <sup>13</sup>C NMR, 101 MHz, CDCl<sub>3</sub>**

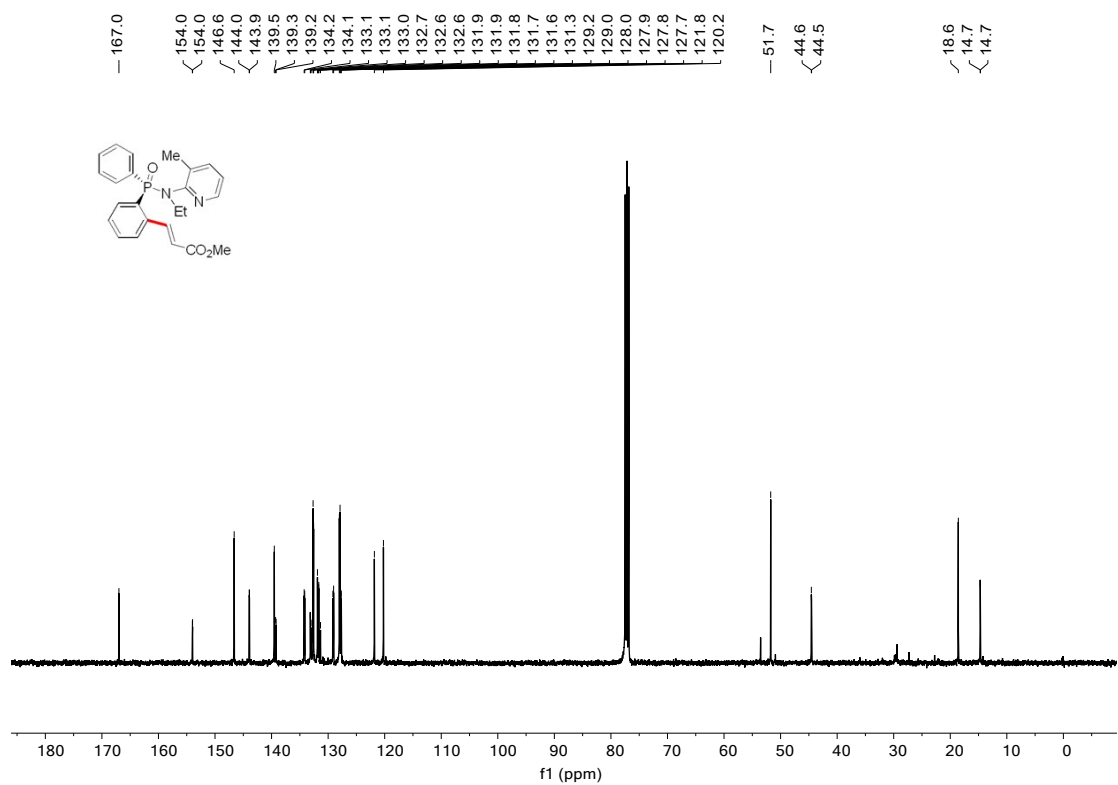

3m,  $^{31}\text{P}$  NMR, 162 MHz,  $\text{CDCl}_3$

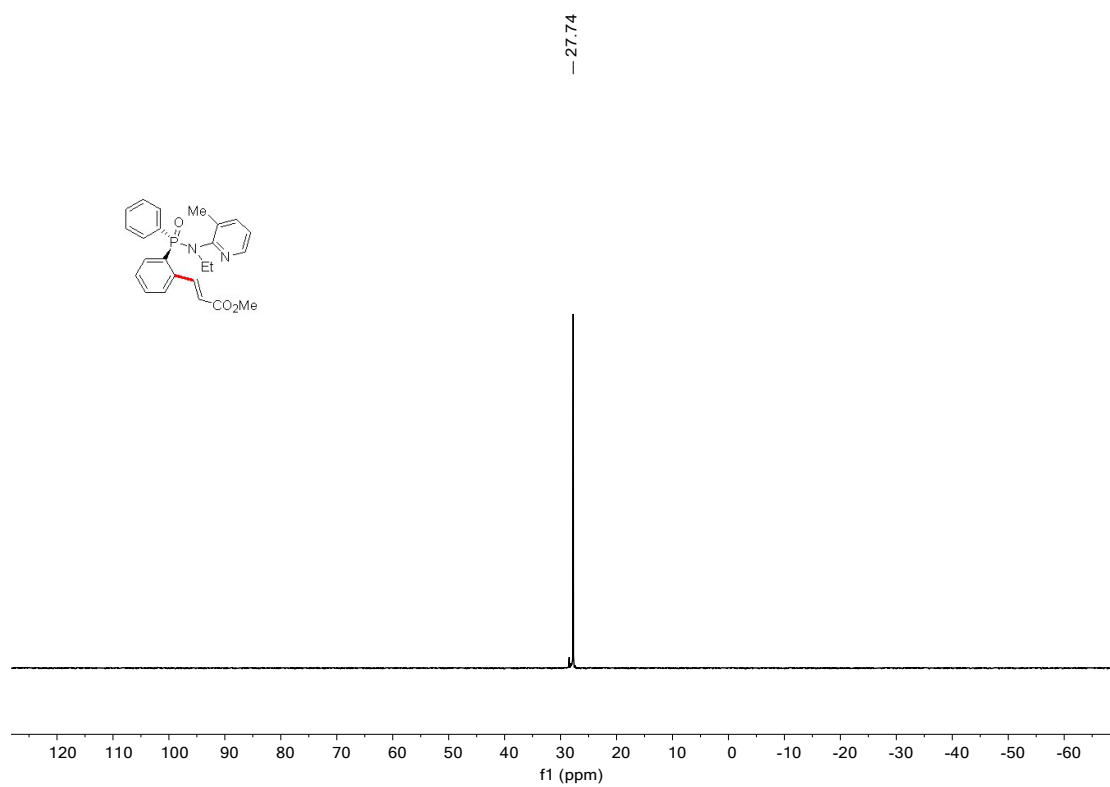

**3n, <sup>1</sup>H NMR, 400 MHz, CDCl<sub>3</sub>**

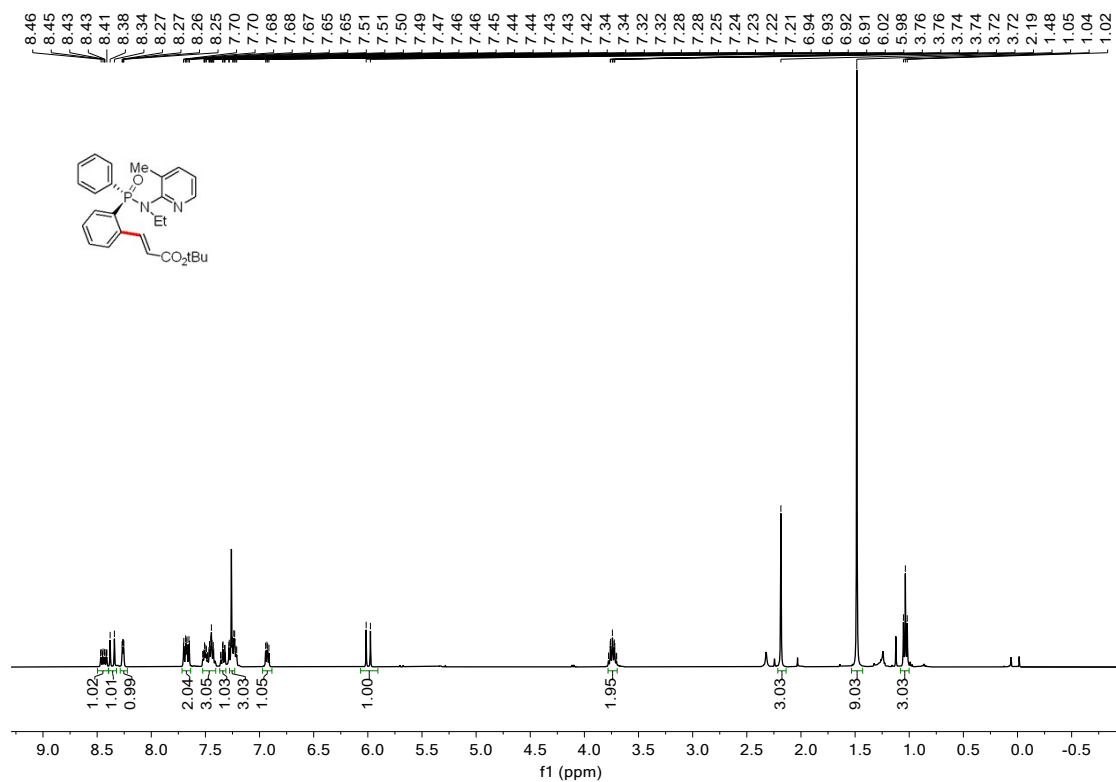

**3n, <sup>13</sup>C NMR, 101 MHz, CDCl<sub>3</sub>**

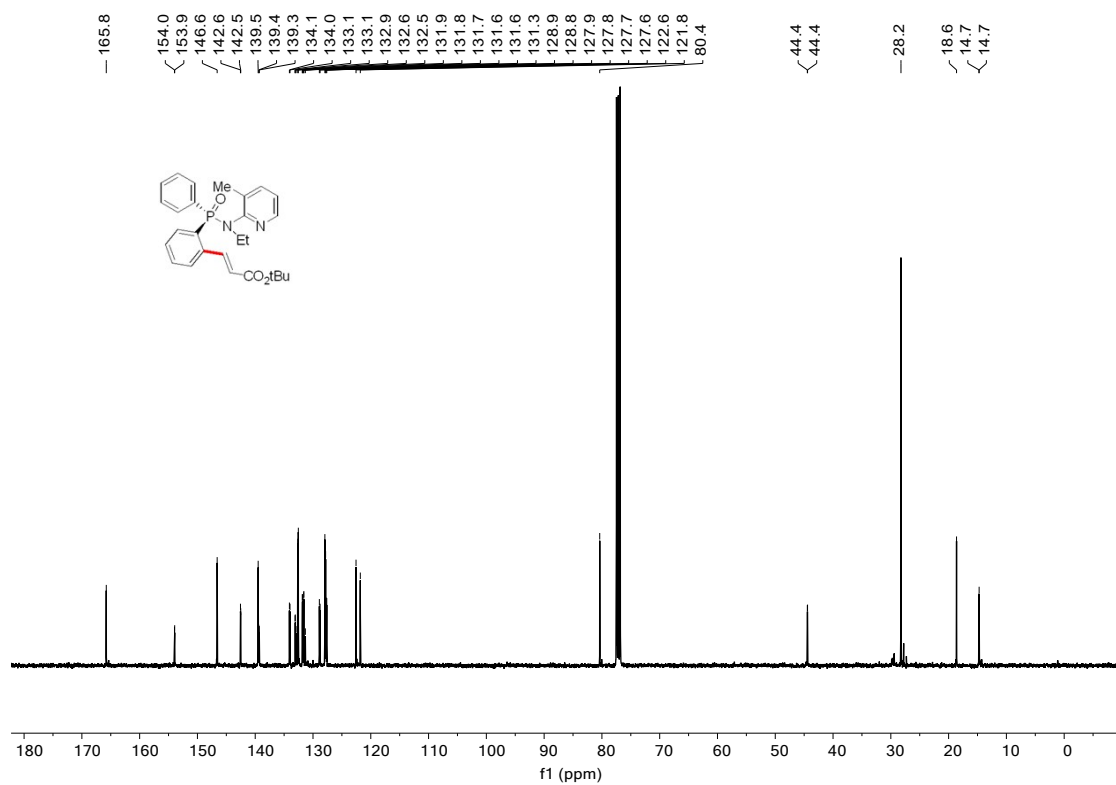

**3n,  $^{31}\text{P}$  NMR, 162 MHz,  $\text{CDCl}_3$**

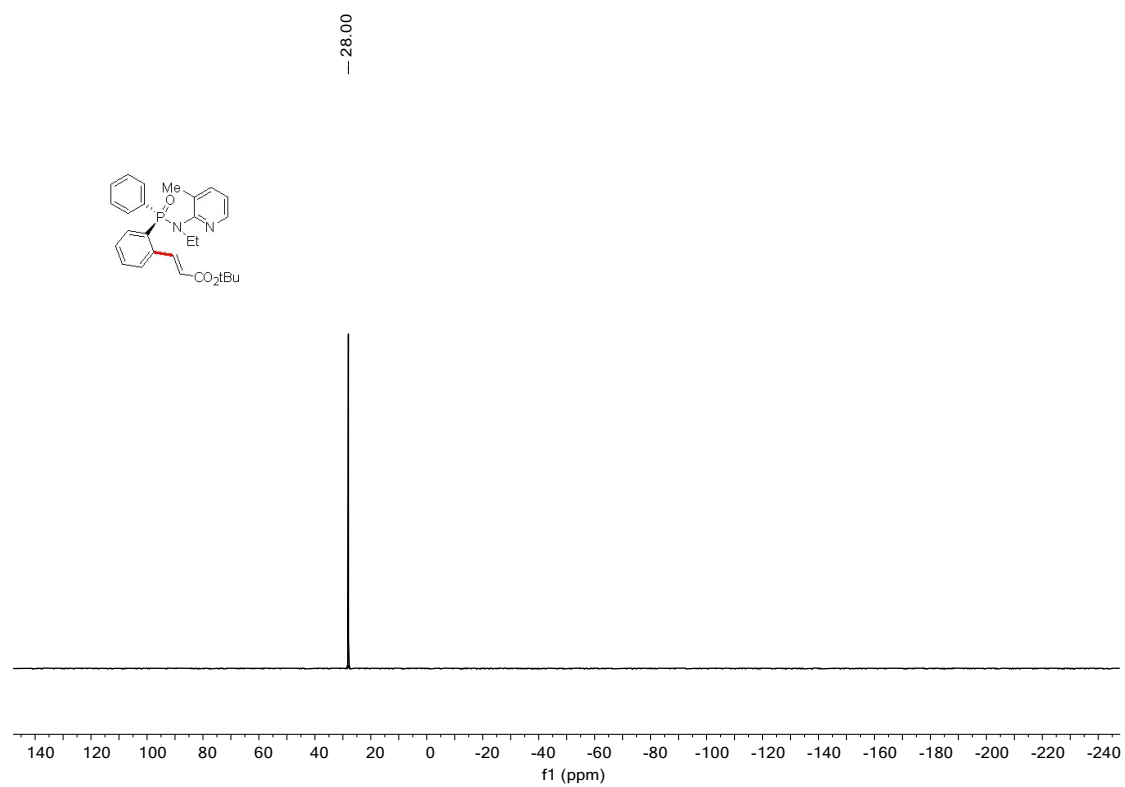

**30, <sup>1</sup>H NMR, 400 MHz, CDCl<sub>3</sub>**

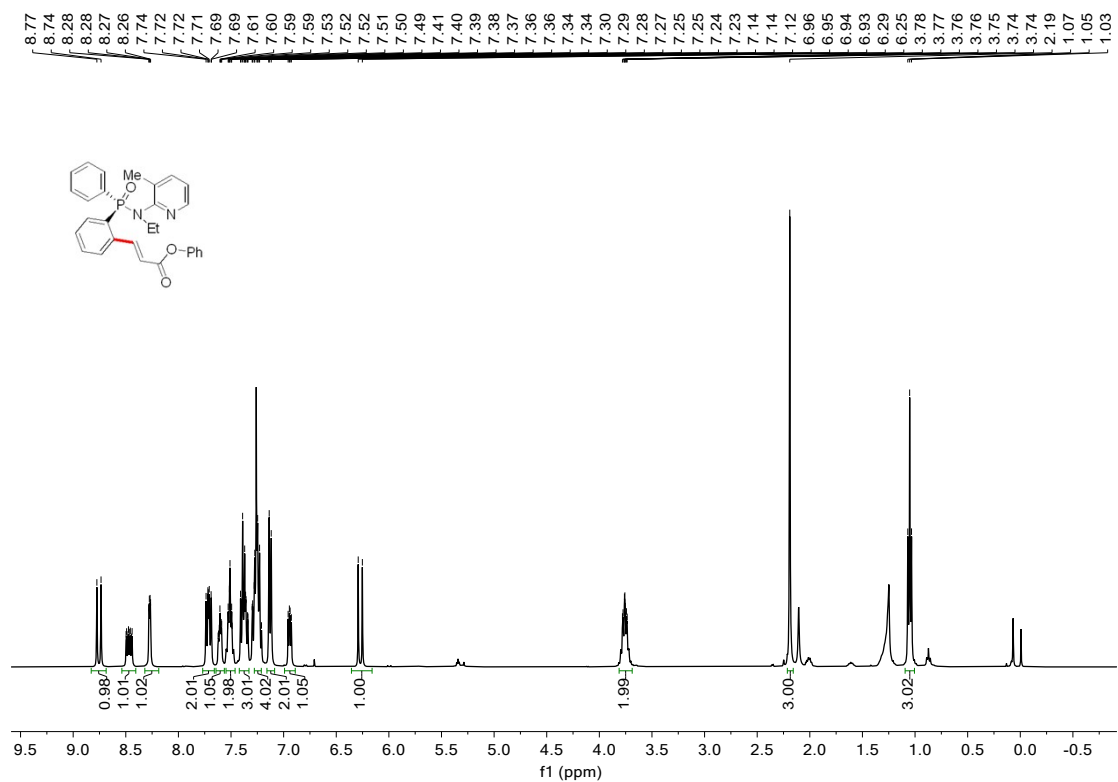

**30, <sup>13</sup>C NMR, 101 MHz, CDCl<sub>3</sub>**

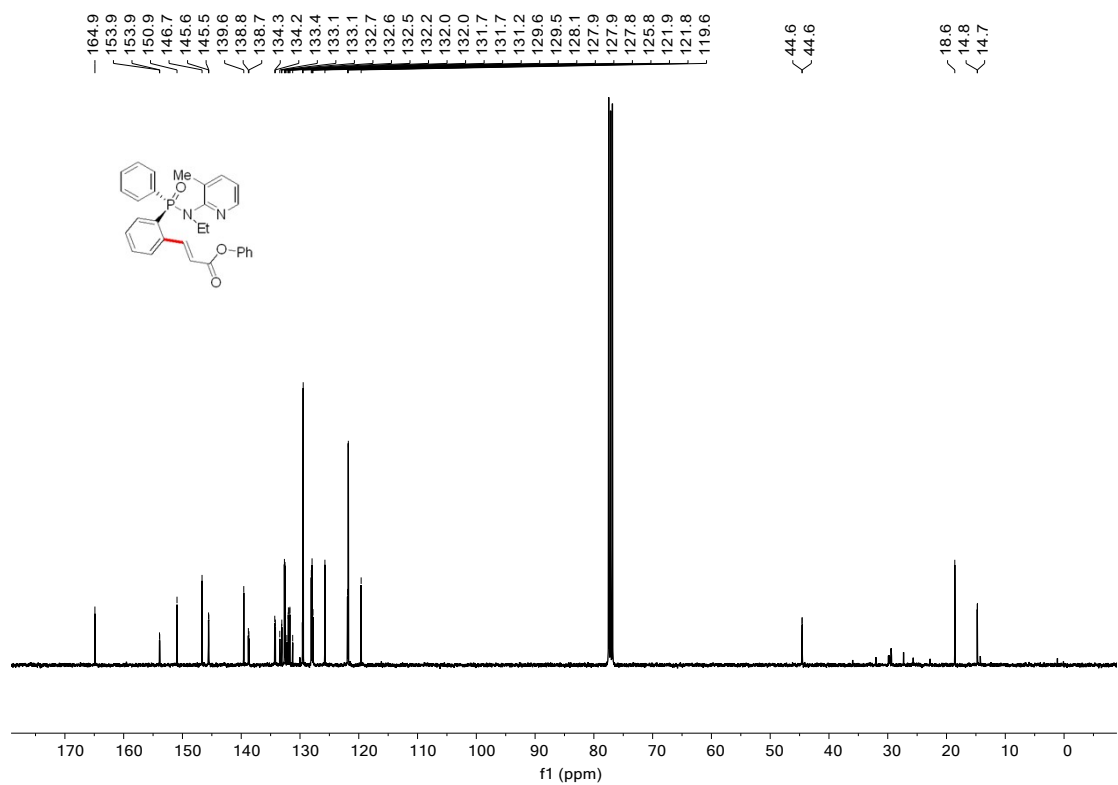



**30,  $^{31}\text{P}$  NMR, 162 MHz,  $\text{CDCl}_3$**

— 27.62

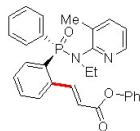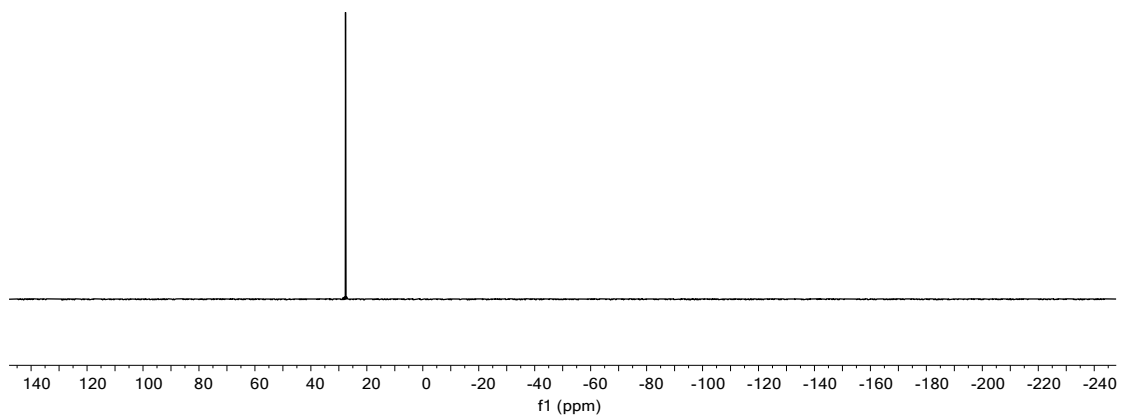

**3p, <sup>1</sup>H NMR, 400 MHz, CDCl<sub>3</sub>**

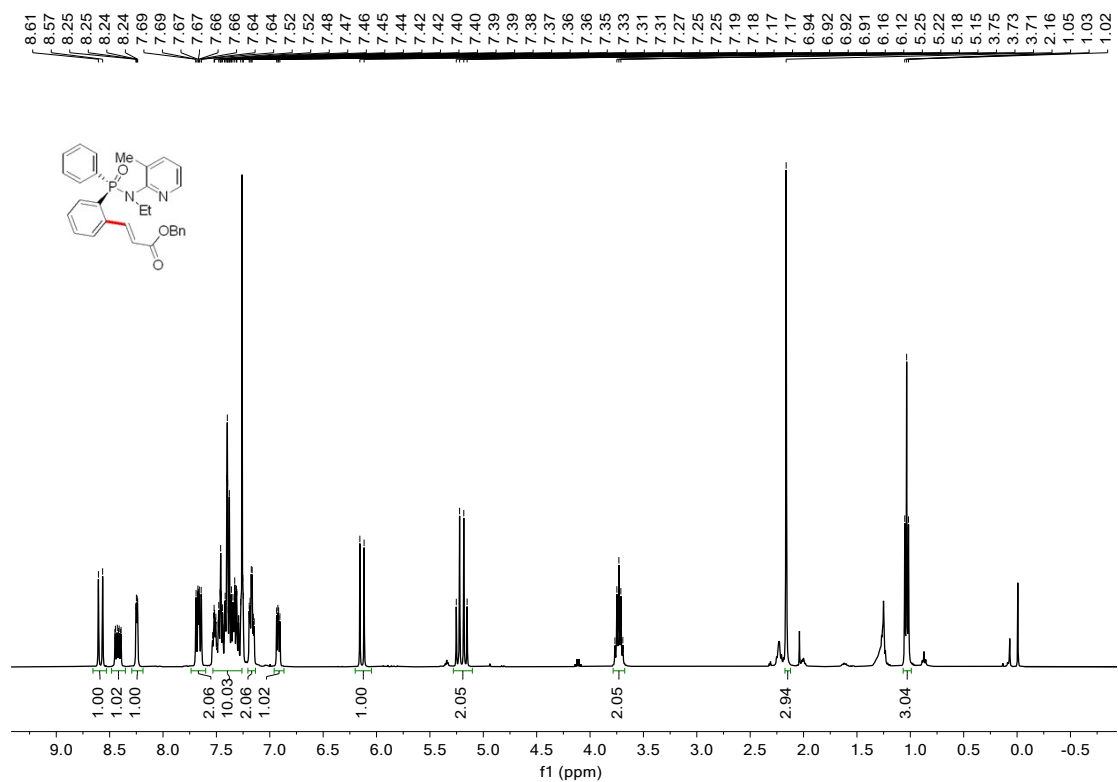

**3p, <sup>13</sup>C NMR, 101 MHz, CDCl<sub>3</sub>**

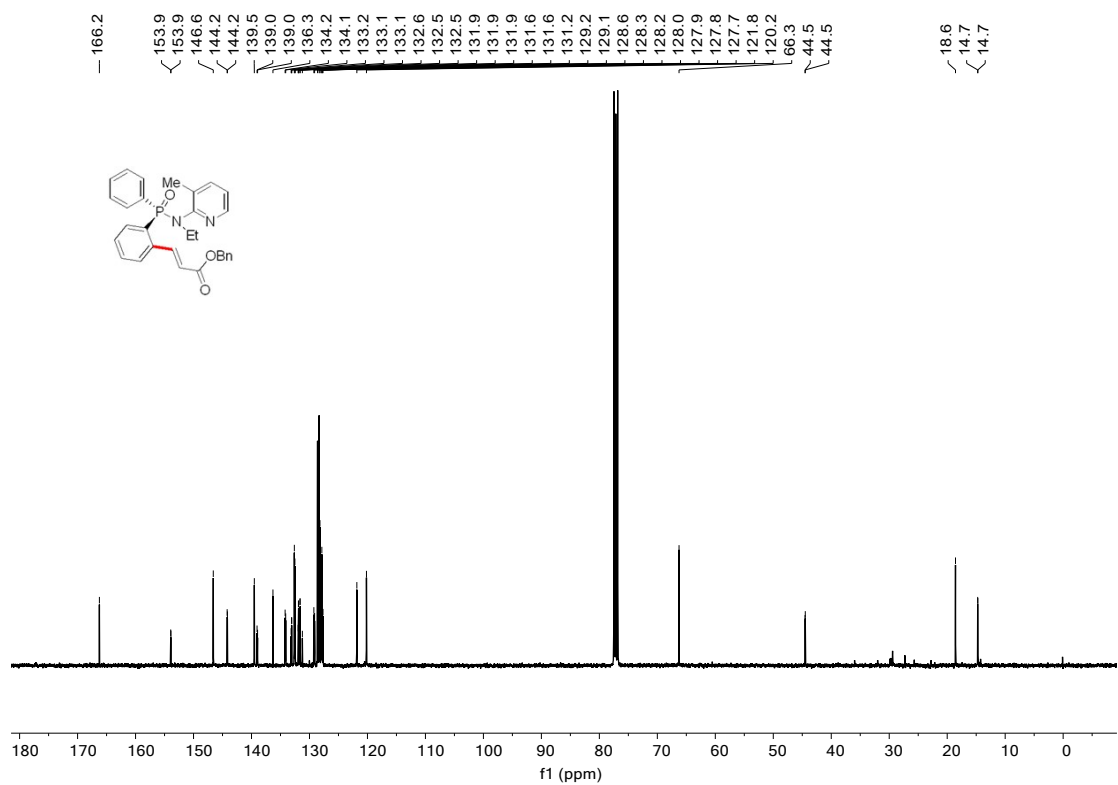

3p,  $^{31}\text{P}$  NMR, 162 MHz,  $\text{CDCl}_3$

— 27.70

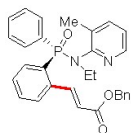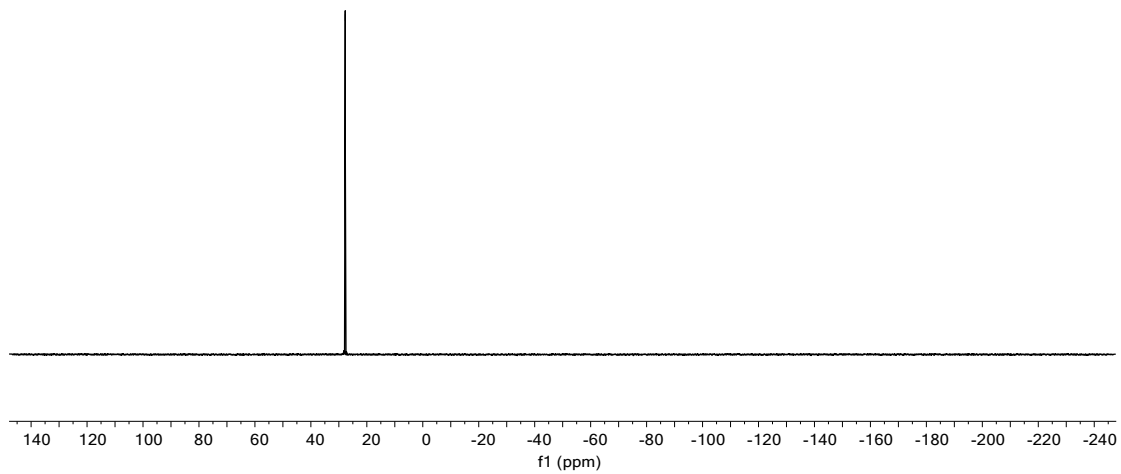

**3q, <sup>1</sup>H NMR, 400 MHz, CDCl<sub>3</sub>**

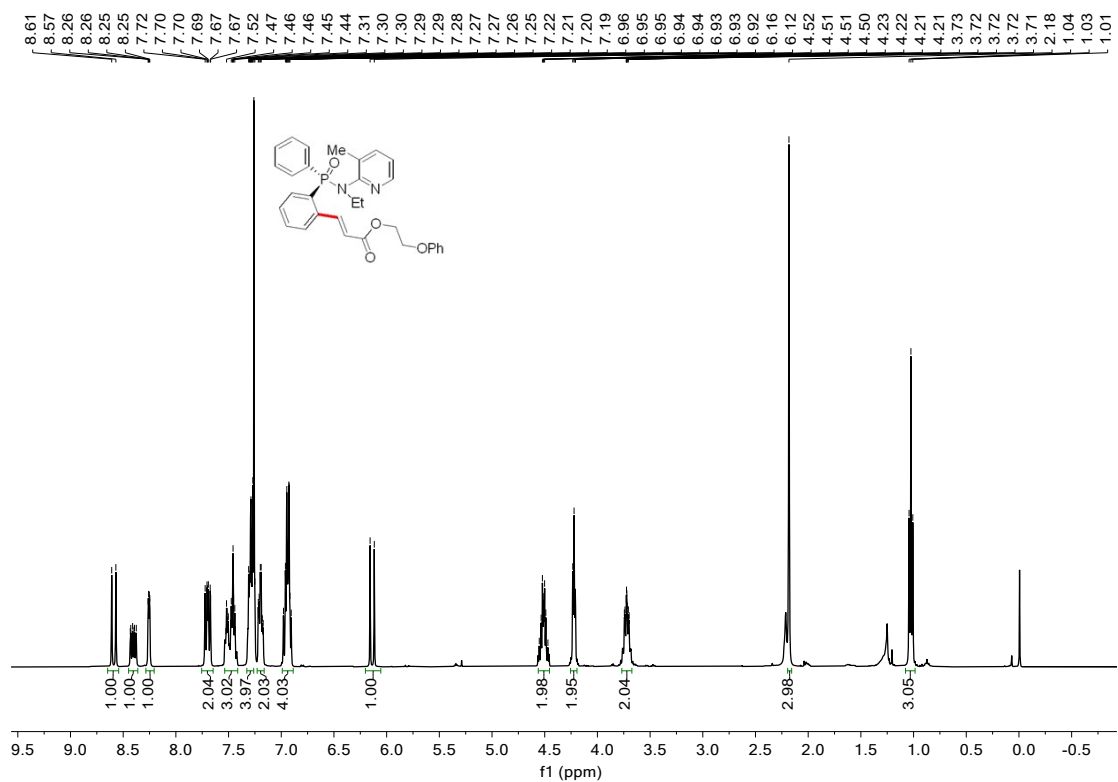

**3q, <sup>13</sup>C NMR, 101 MHz, CDCl<sub>3</sub>**

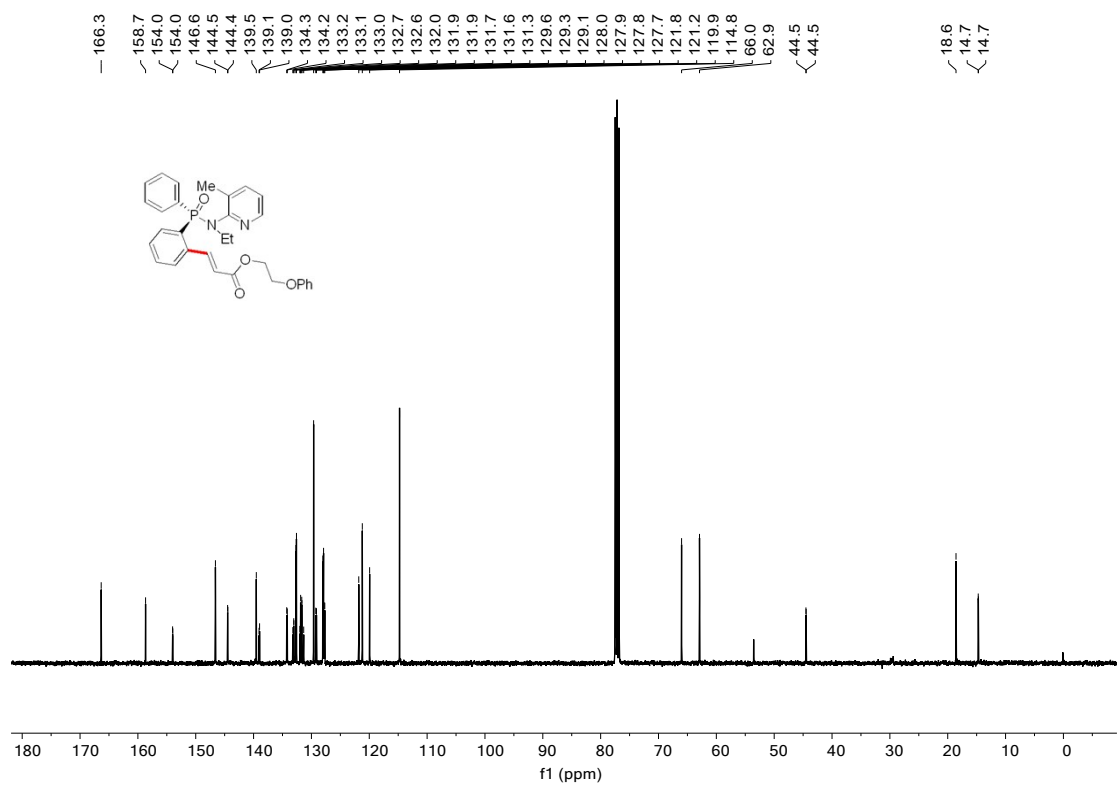

**3q,  $^{31}\text{P}$  NMR, 162 MHz,  $\text{CDCl}_3$**

— 27.63

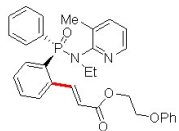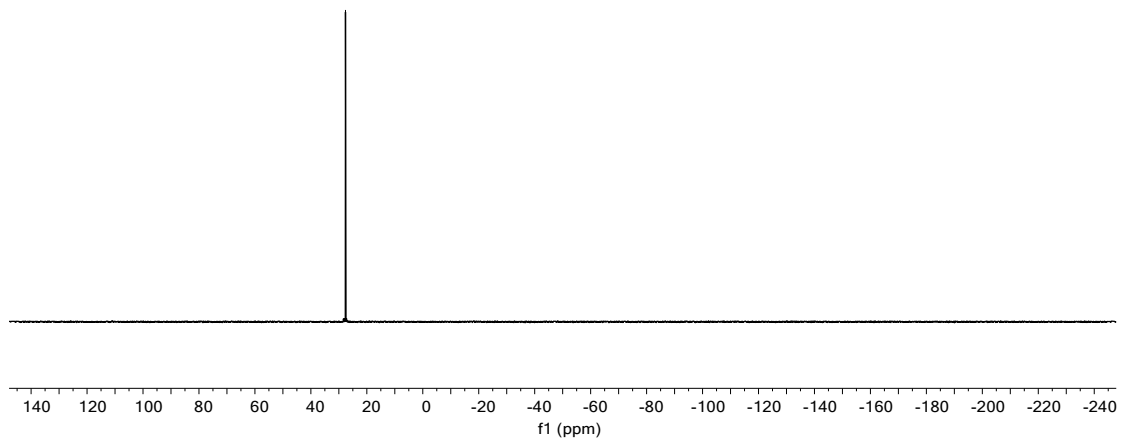

**3r, <sup>1</sup>H NMR, 400 MHz, CDCl<sub>3</sub>**

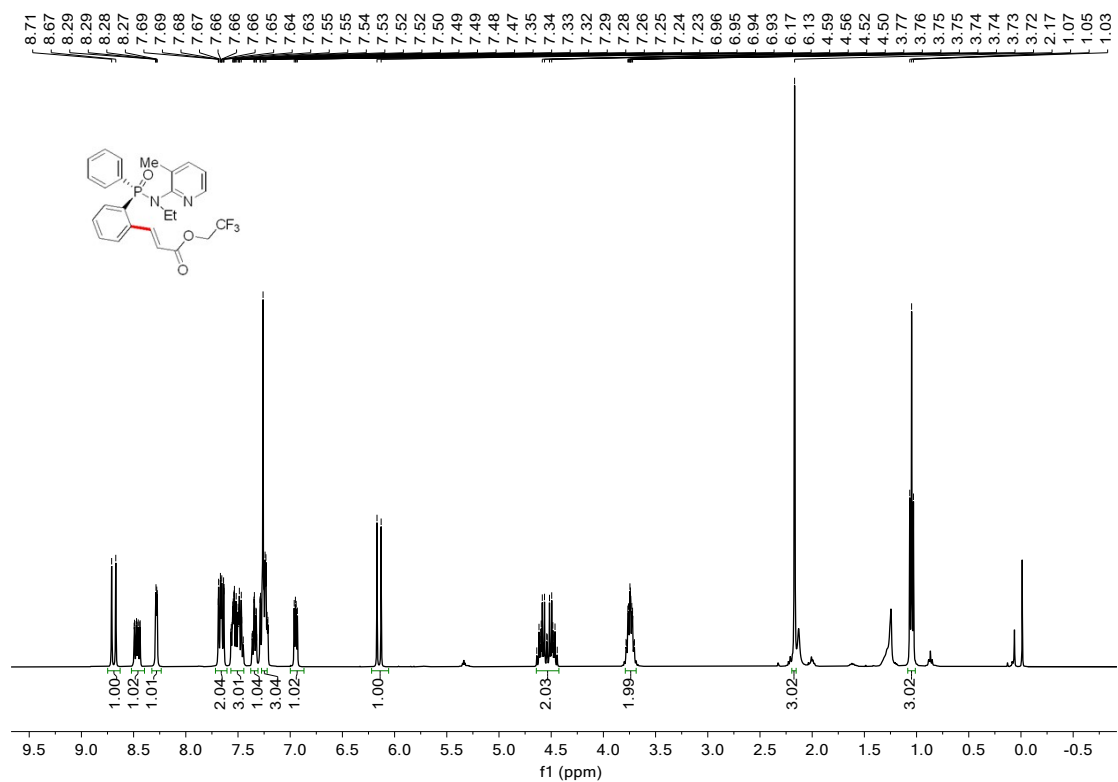

**3r, <sup>13</sup>C NMR, 101 MHz, CDCl<sub>3</sub>**

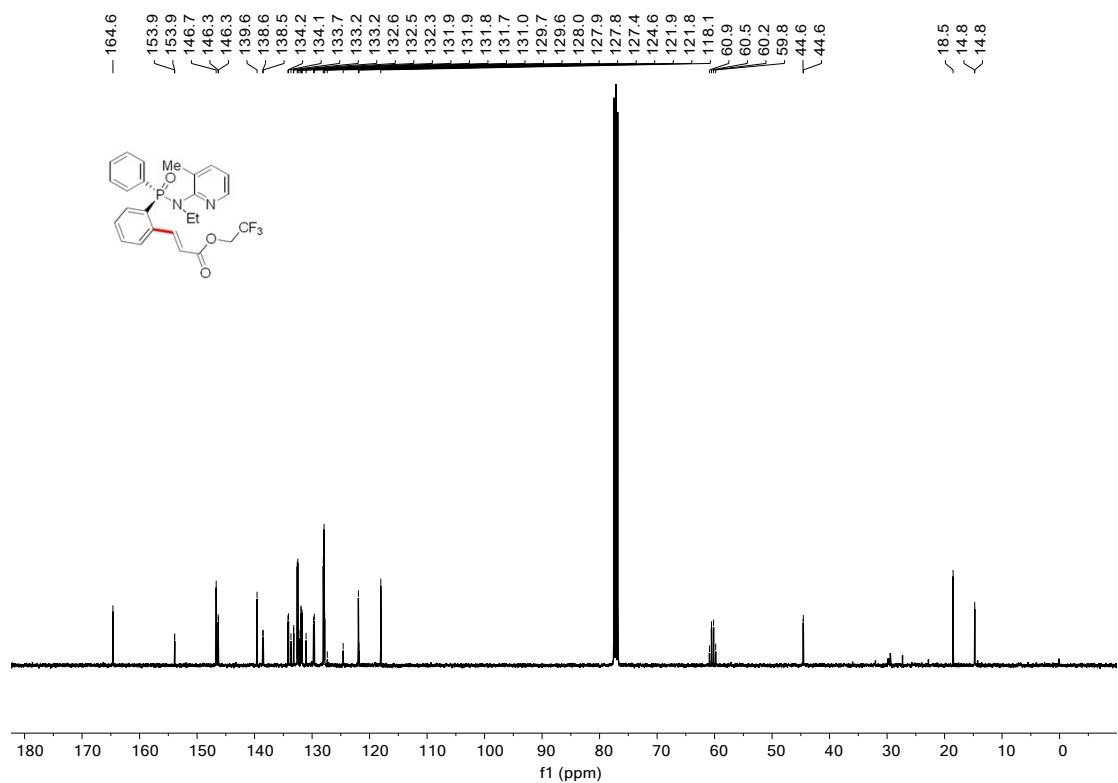

**3r, <sup>31</sup>P NMR, 162 MHz, CDCl<sub>3</sub>**

— 27.40

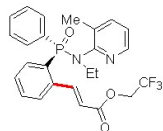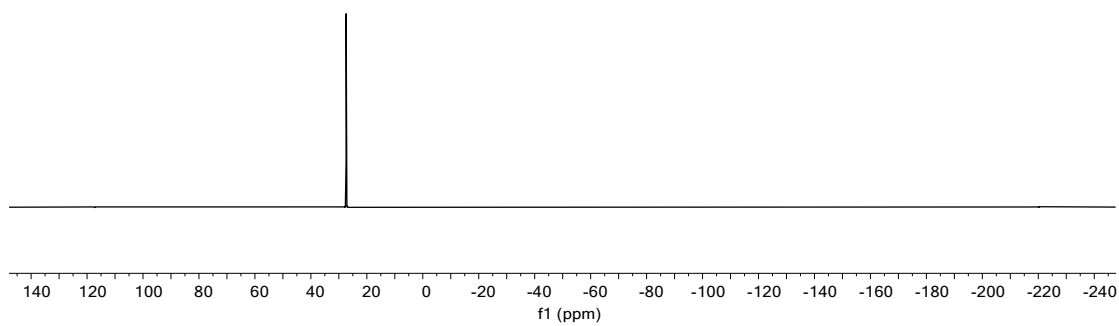

**3r, <sup>19</sup>F NMR, 376 MHz, CDCl<sub>3</sub>**

— -73.60

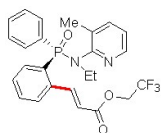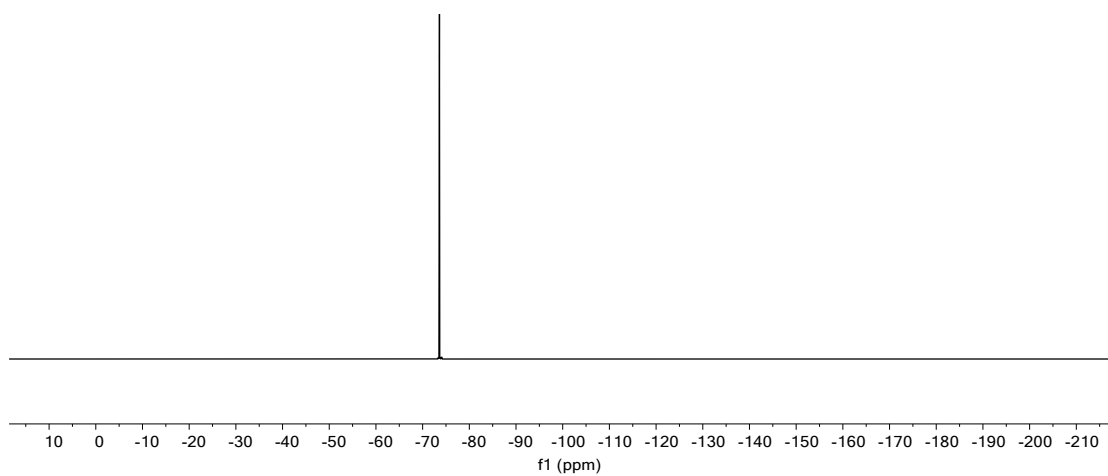

**3s, <sup>1</sup>H NMR, 400 MHz, CDCl<sub>3</sub>**

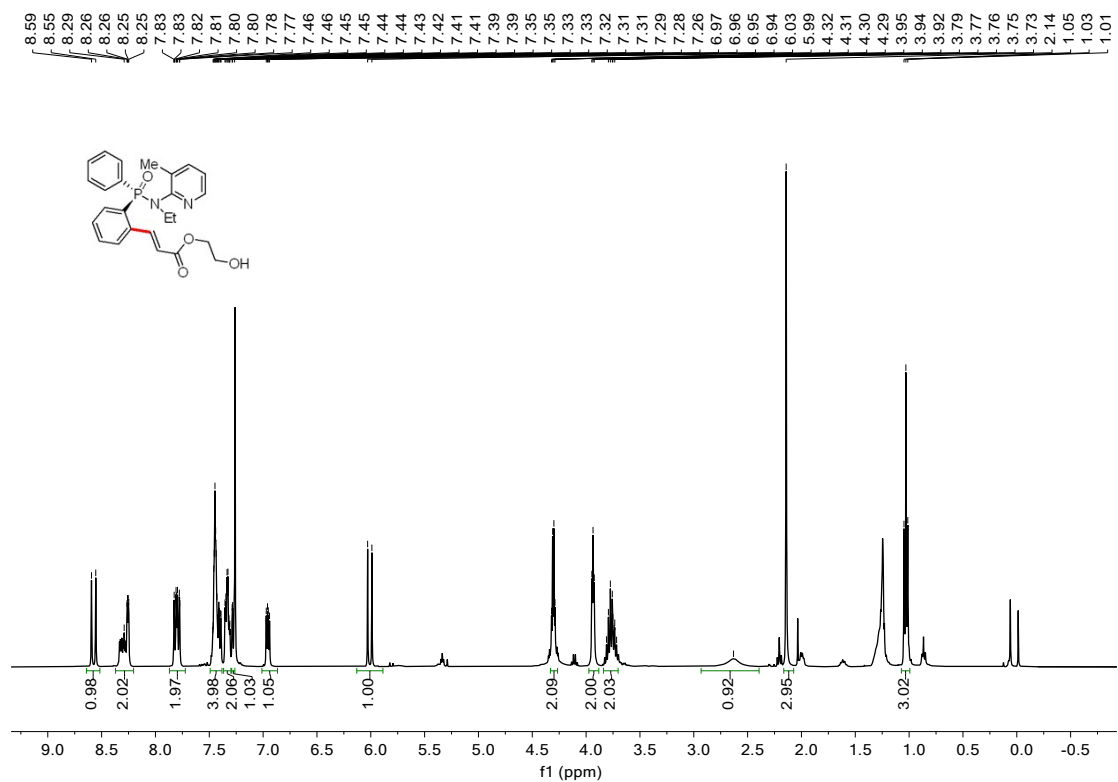

**3s, <sup>13</sup>C NMR, 101 MHz, CDCl<sub>3</sub>**

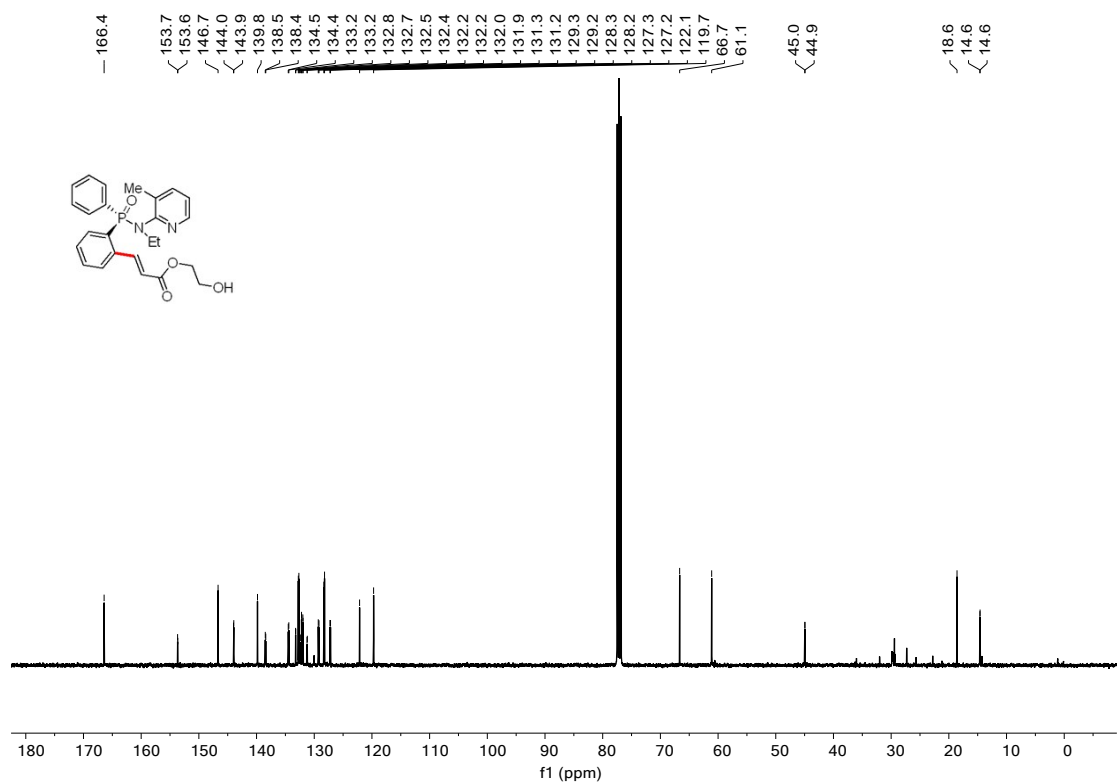



3s,  $^{31}\text{P}$  NMR, 162 MHz,  $\text{CDCl}_3$

— 28.03

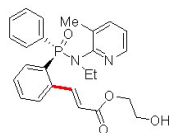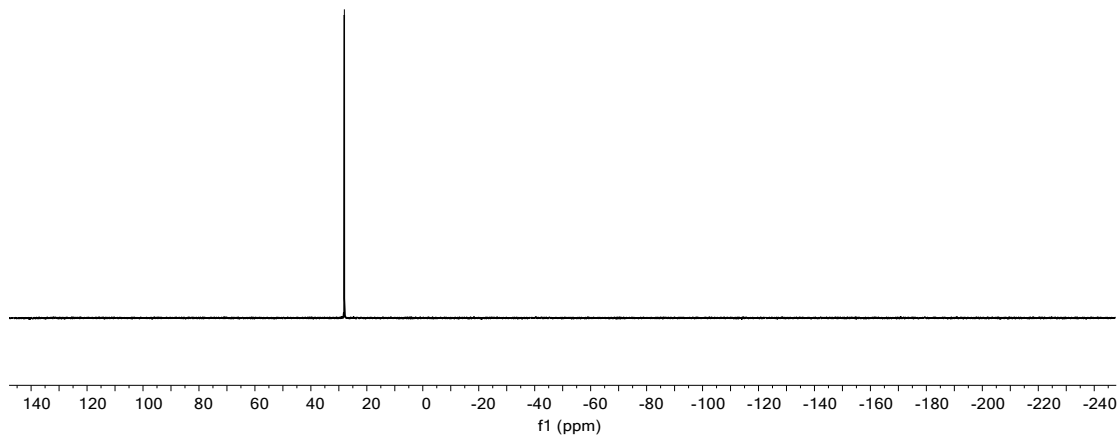

**3t, <sup>1</sup>H NMR, 400 MHz, CDCl<sub>3</sub>**

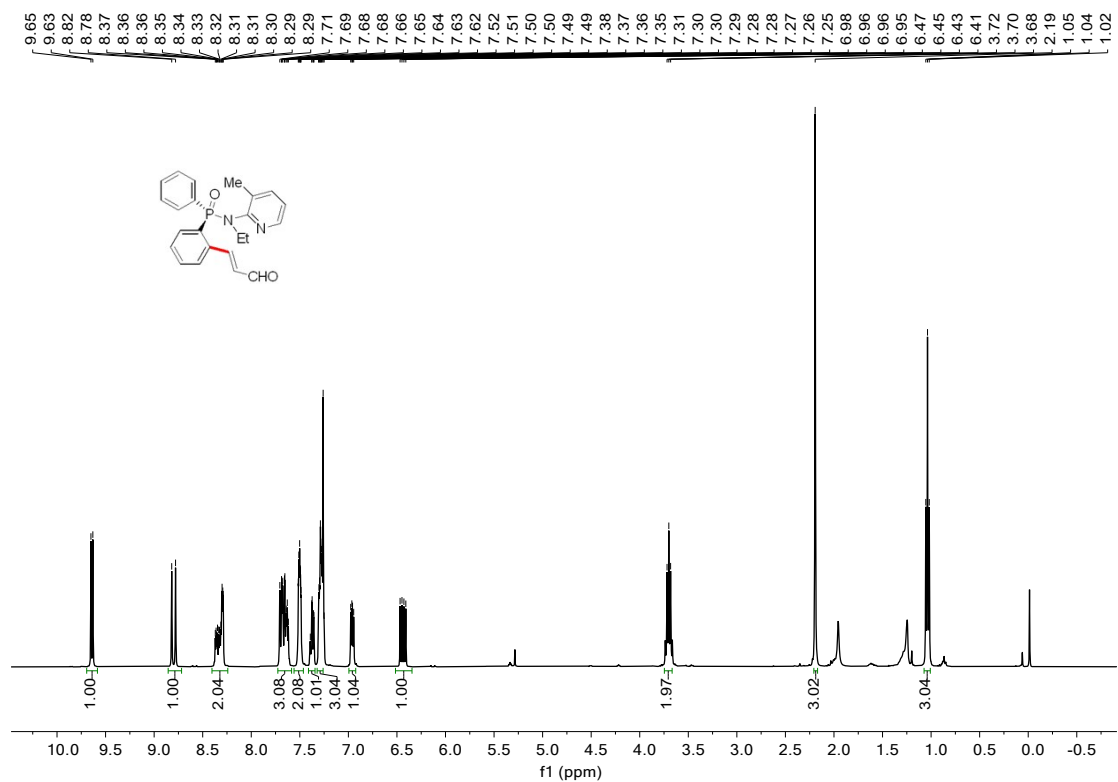

**3t, <sup>13</sup>C NMR, 101 MHz, CDCl<sub>3</sub>**

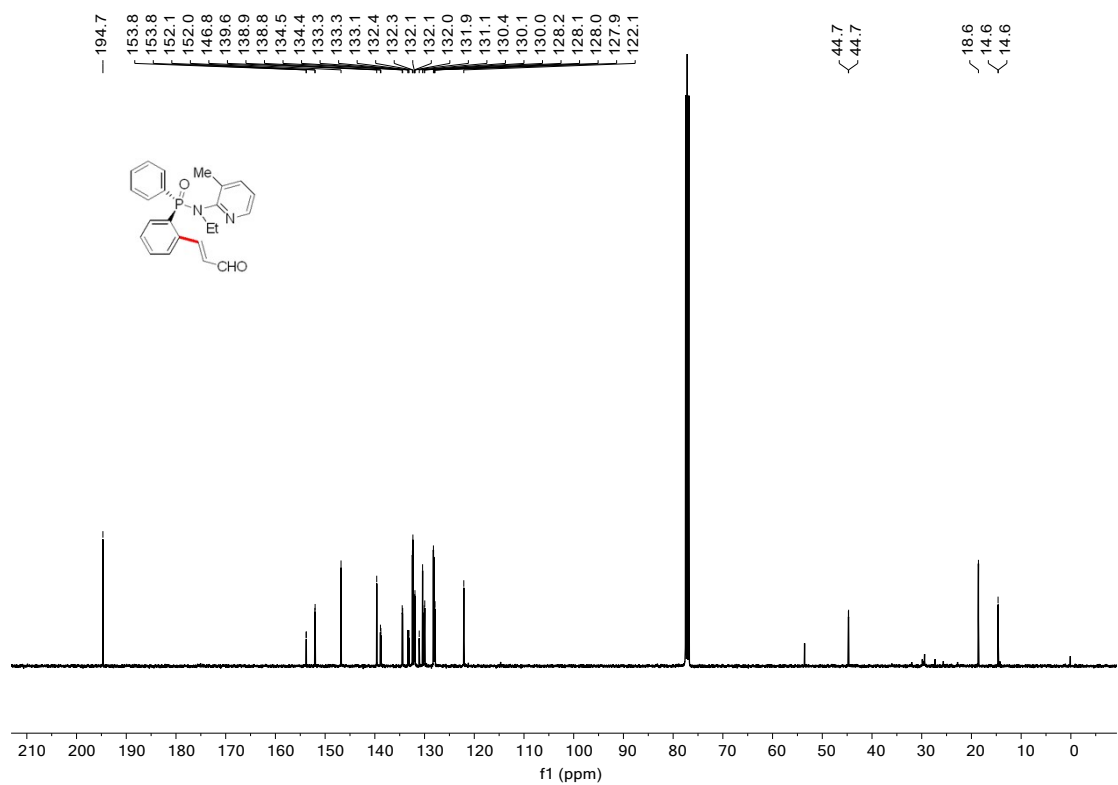

**3t,  $^{31}\text{P}$  NMR, 162 MHz,  $\text{CDCl}_3$**

— 28.01

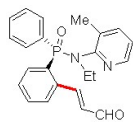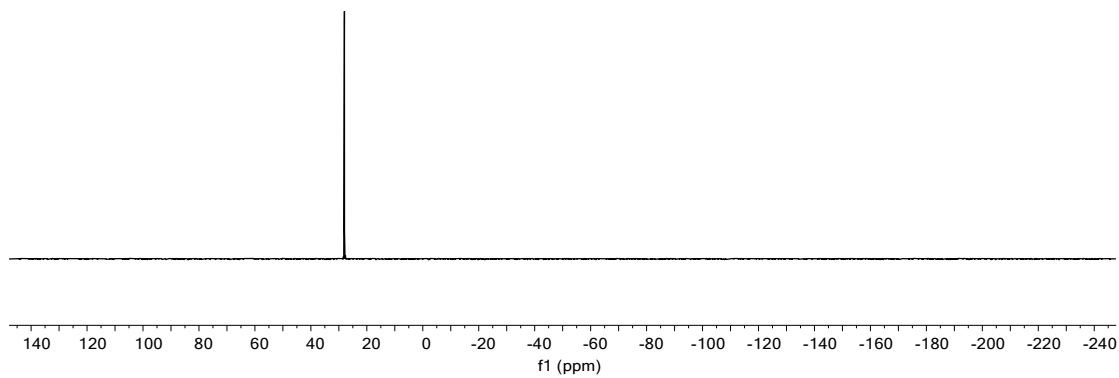

**3u, <sup>1</sup>H NMR, 400 MHz, CDCl<sub>3</sub>**

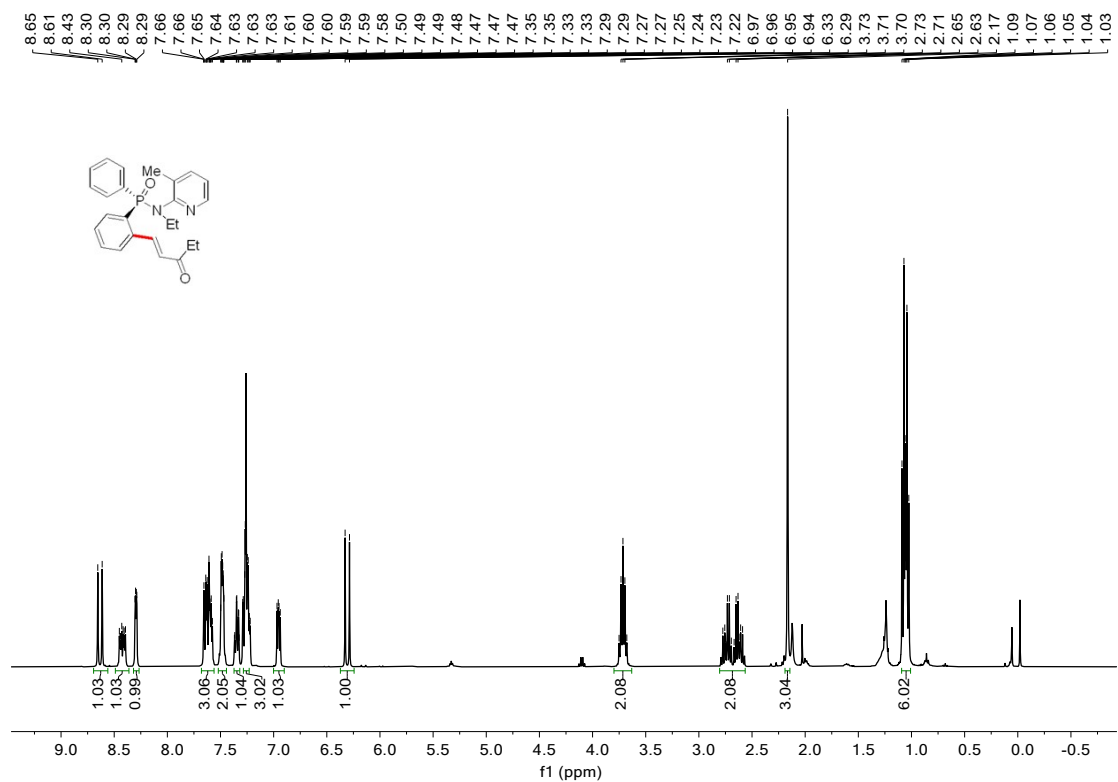

**3u, <sup>13</sup>C NMR, 101 MHz, CDCl<sub>3</sub>**

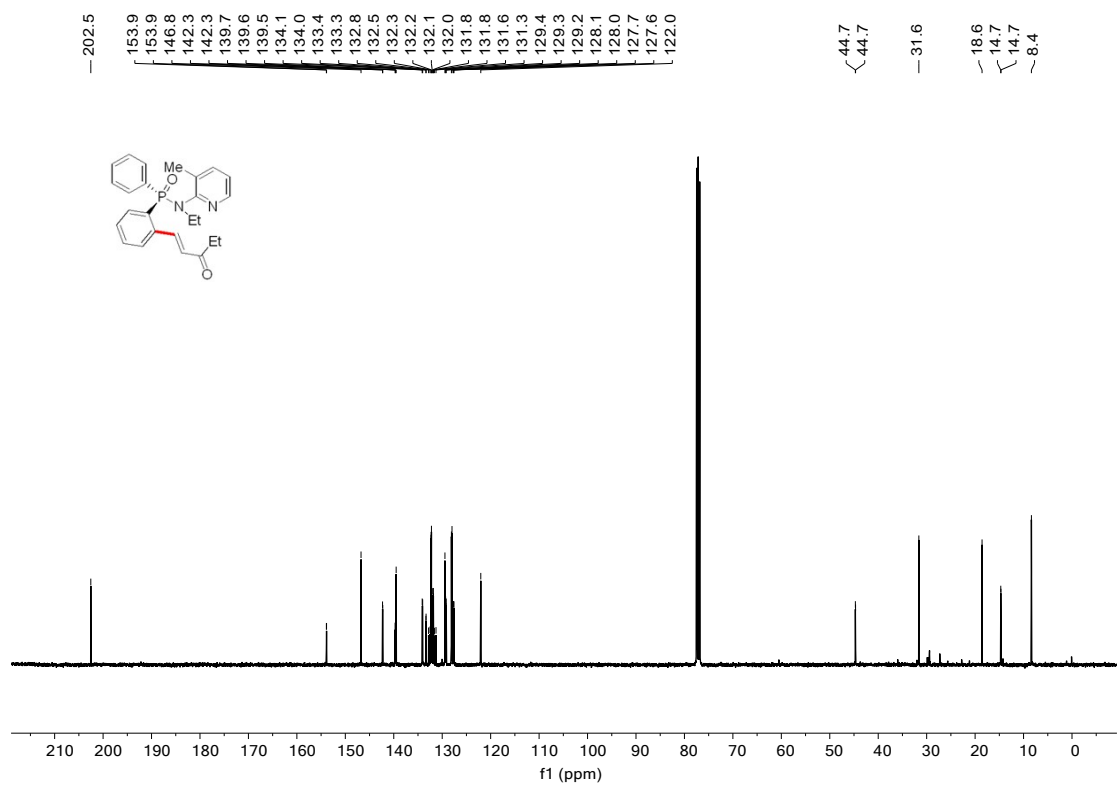

**3u,  $^{31}\text{P}$  NMR, 162 MHz,  $\text{CDCl}_3$**

— 28.38

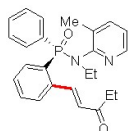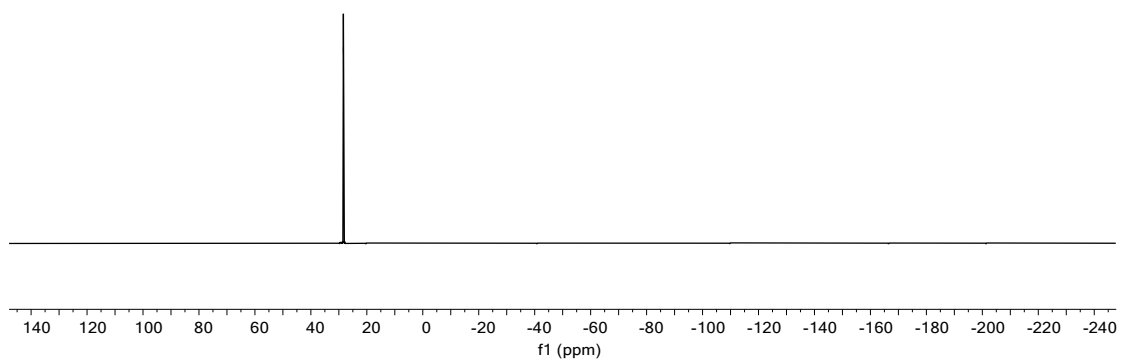

**3v, <sup>1</sup>H NMR, 400 MHz, CDCl<sub>3</sub>**

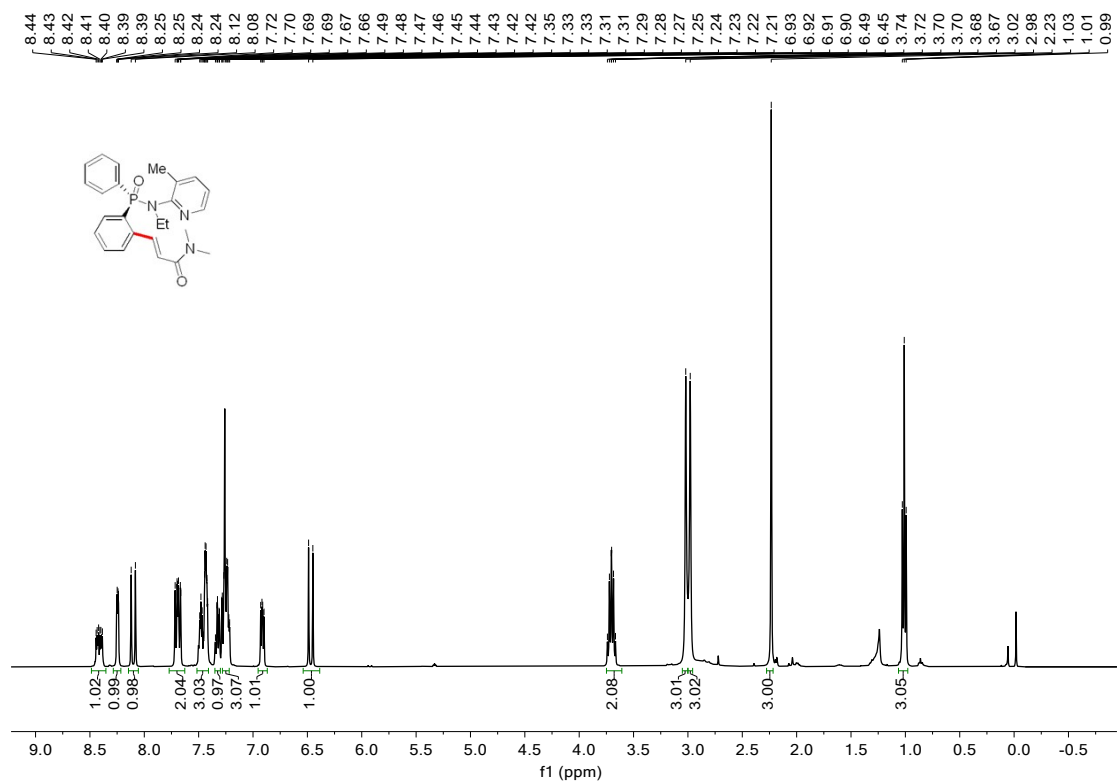

**3v, <sup>13</sup>C NMR, 101 MHz, CDCl<sub>3</sub>**

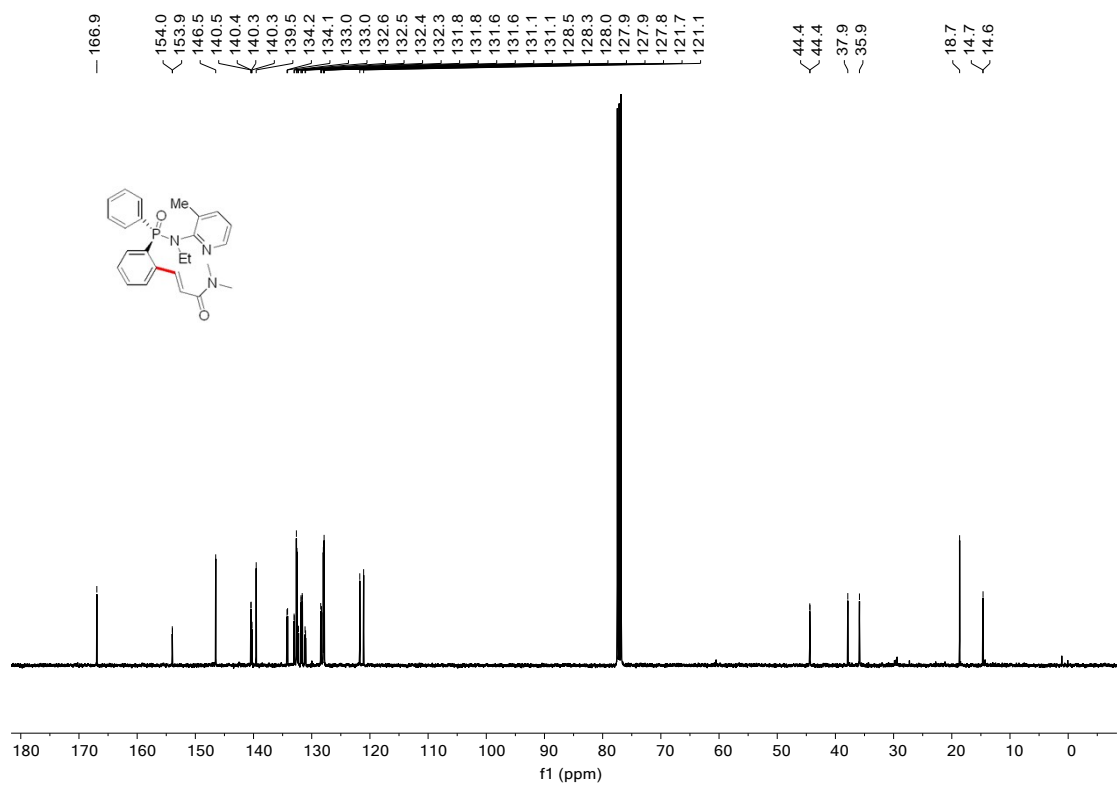

3v,  $^{31}\text{P}$  NMR, 162 MHz,  $\text{CDCl}_3$

— 28.29

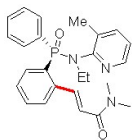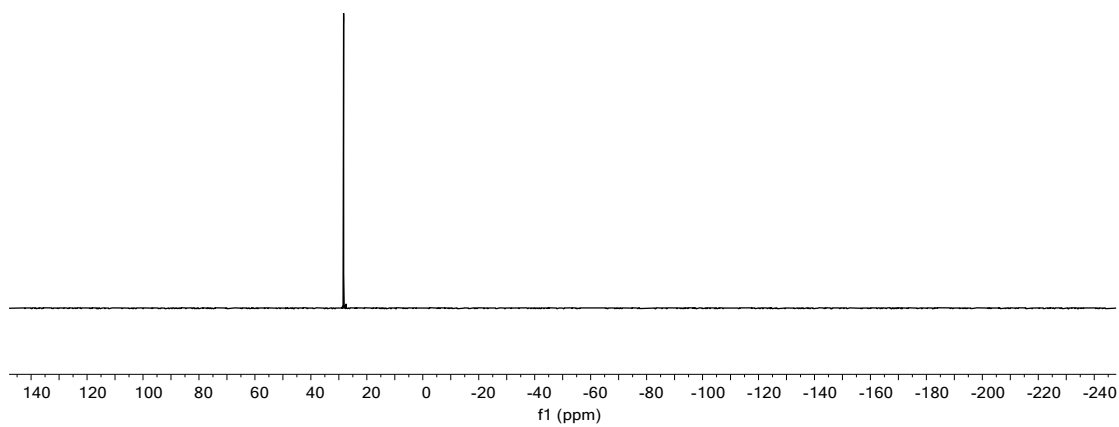

**3w, <sup>1</sup>H NMR, 400 MHz, CDCl<sub>3</sub>**

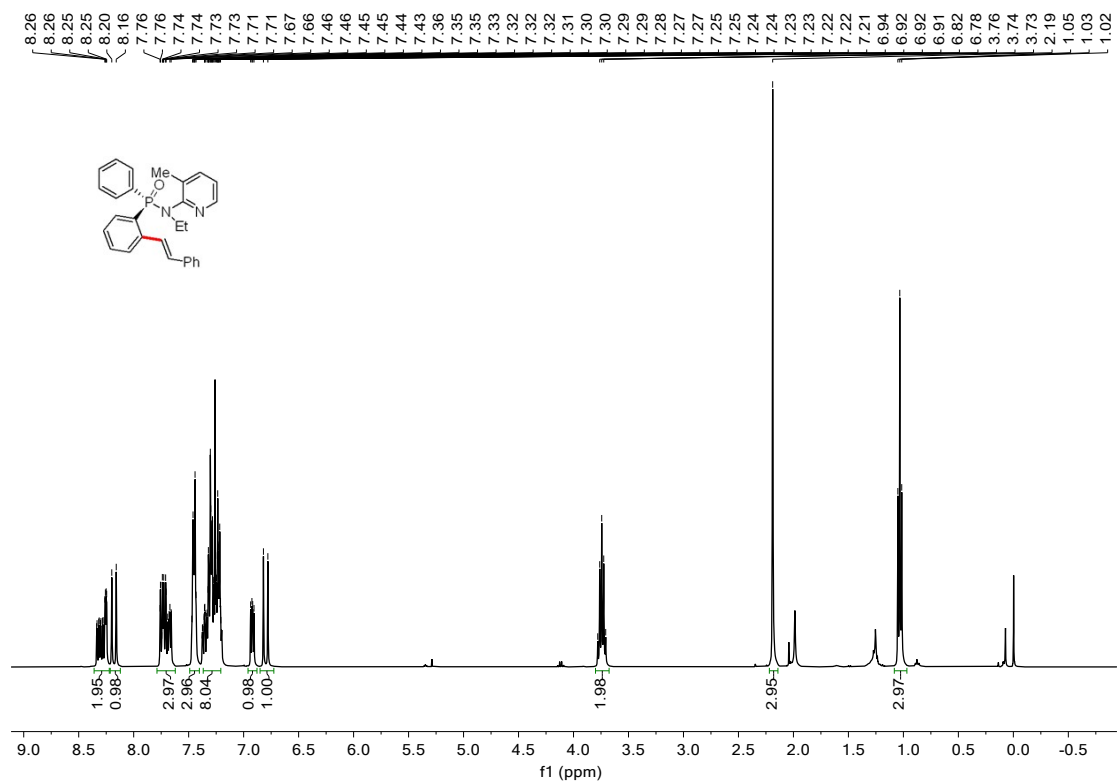

**3w, <sup>13</sup>C NMR, 101 MHz, CDCl<sub>3</sub>**

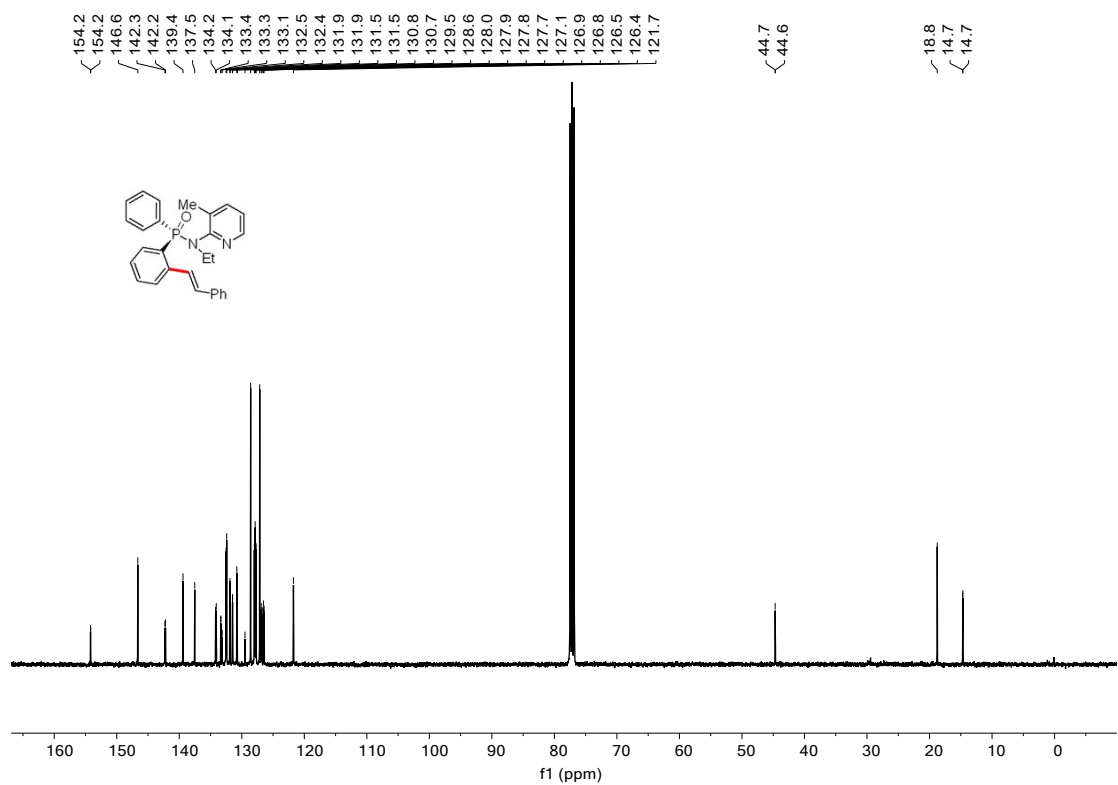



**3w,  $^{31}\text{P}$  NMR, 162 MHz,  $\text{CDCl}_3$**

— 29.01

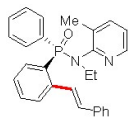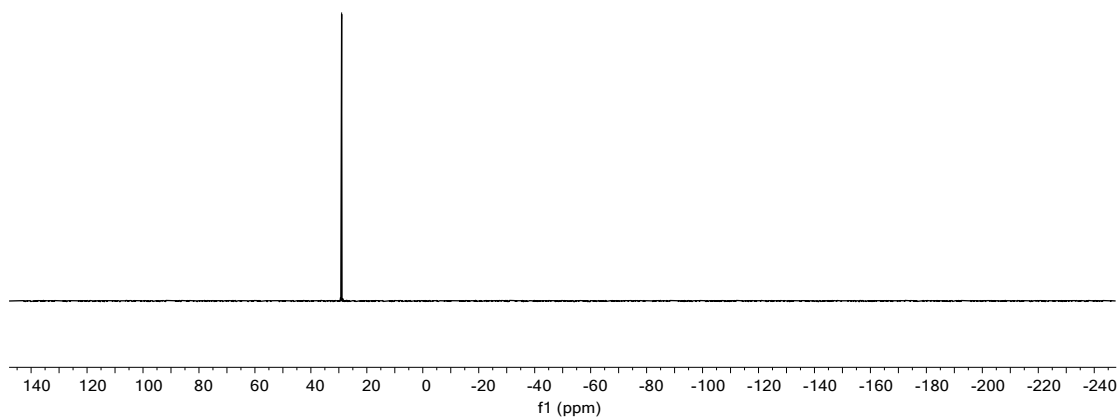

**3x, <sup>1</sup>H NMR, 400 MHz, CDCl<sub>3</sub>**

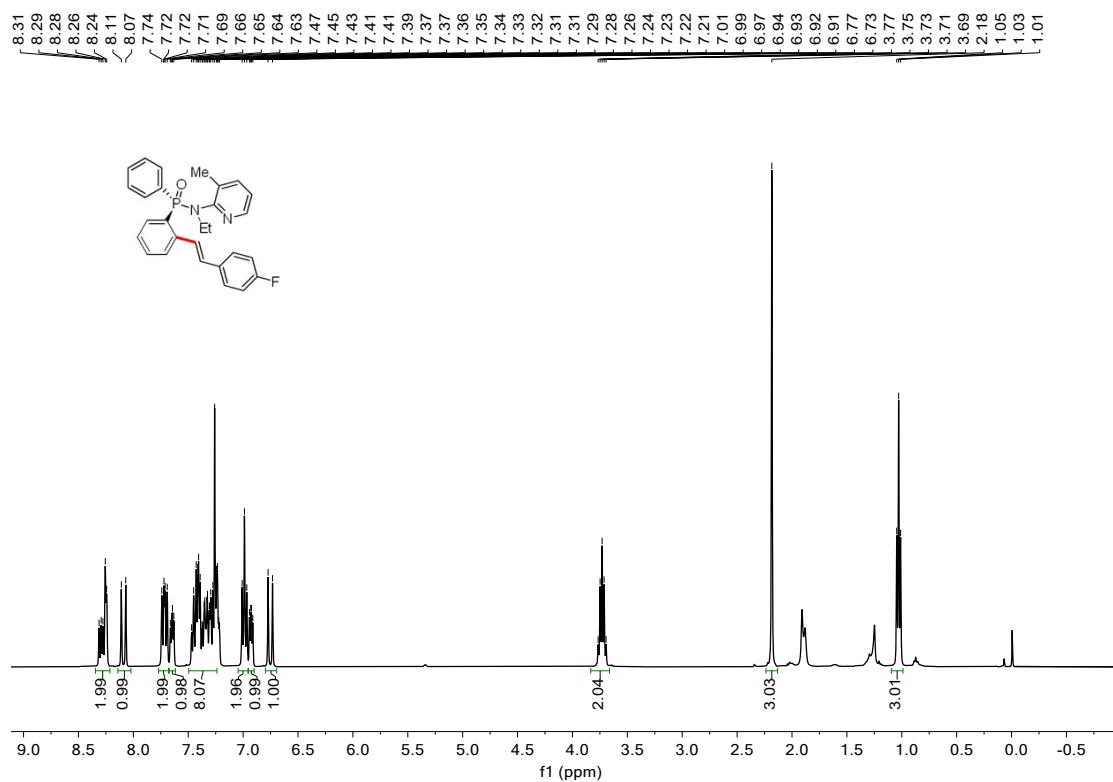

**3x, <sup>13</sup>C NMR, 101 MHz, CDCl<sub>3</sub>**

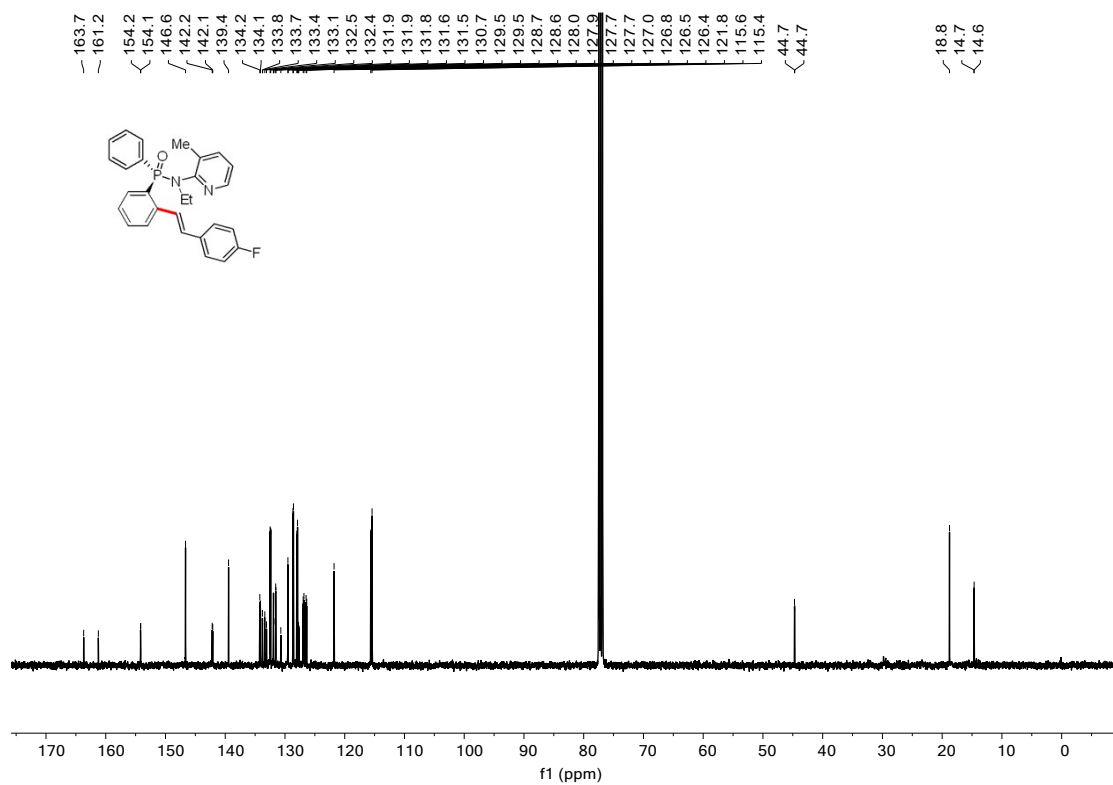

**3x,  $^{31}\text{P}$  NMR, 162 MHz,  $\text{CDCl}_3$**

—29.46

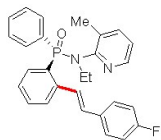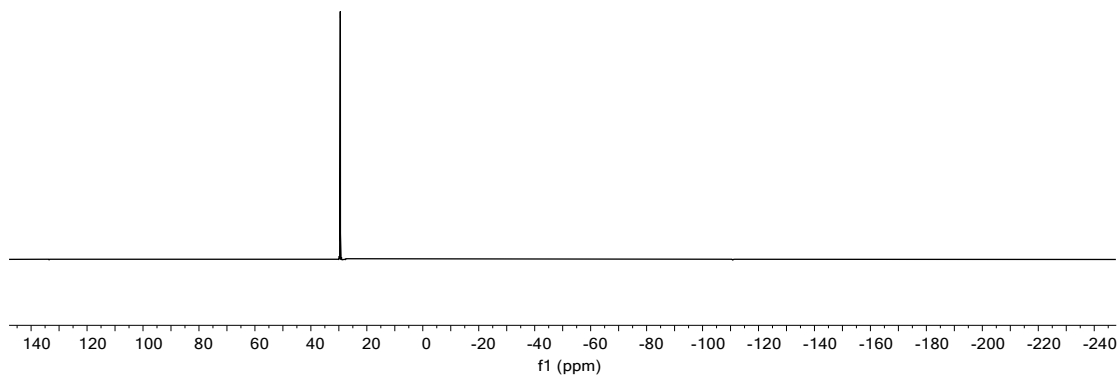

**3x,  $^{19}\text{F}$  NMR, 376 MHz,  $\text{CDCl}_3$**

—-114.21

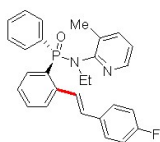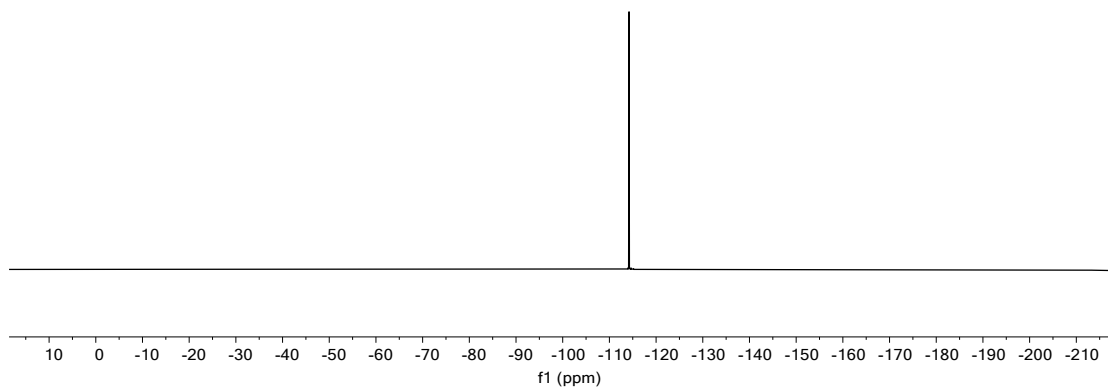

**3y, <sup>1</sup>H NMR, 400 MHz, CDCl<sub>3</sub>**

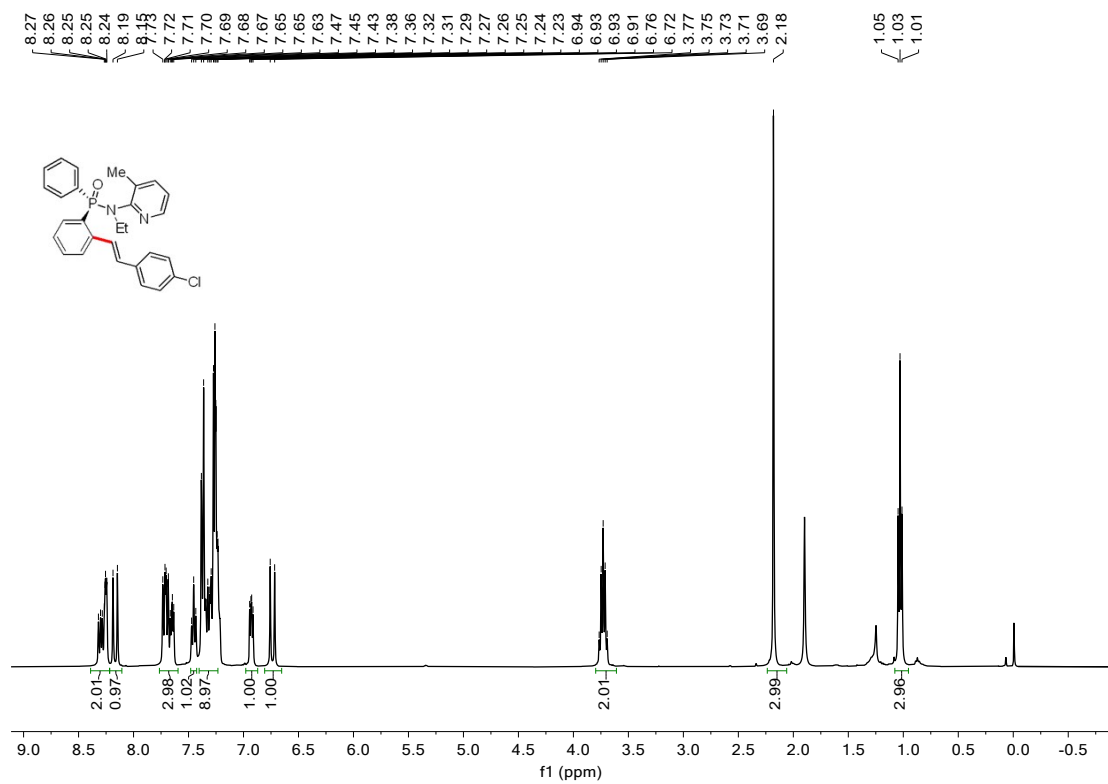

**3y, <sup>13</sup>C NMR, 101 MHz, CDCl<sub>3</sub>**

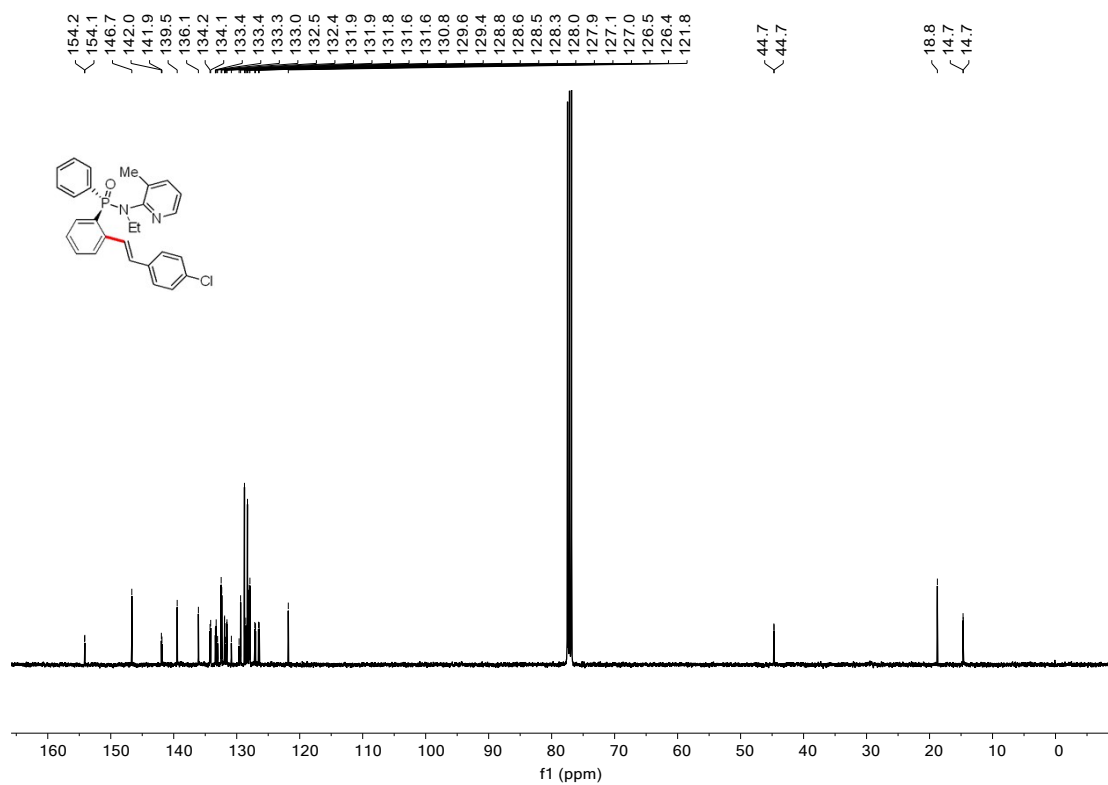

3y,  $^{31}\text{P}$  NMR, 162 MHz,  $\text{CDCl}_3$

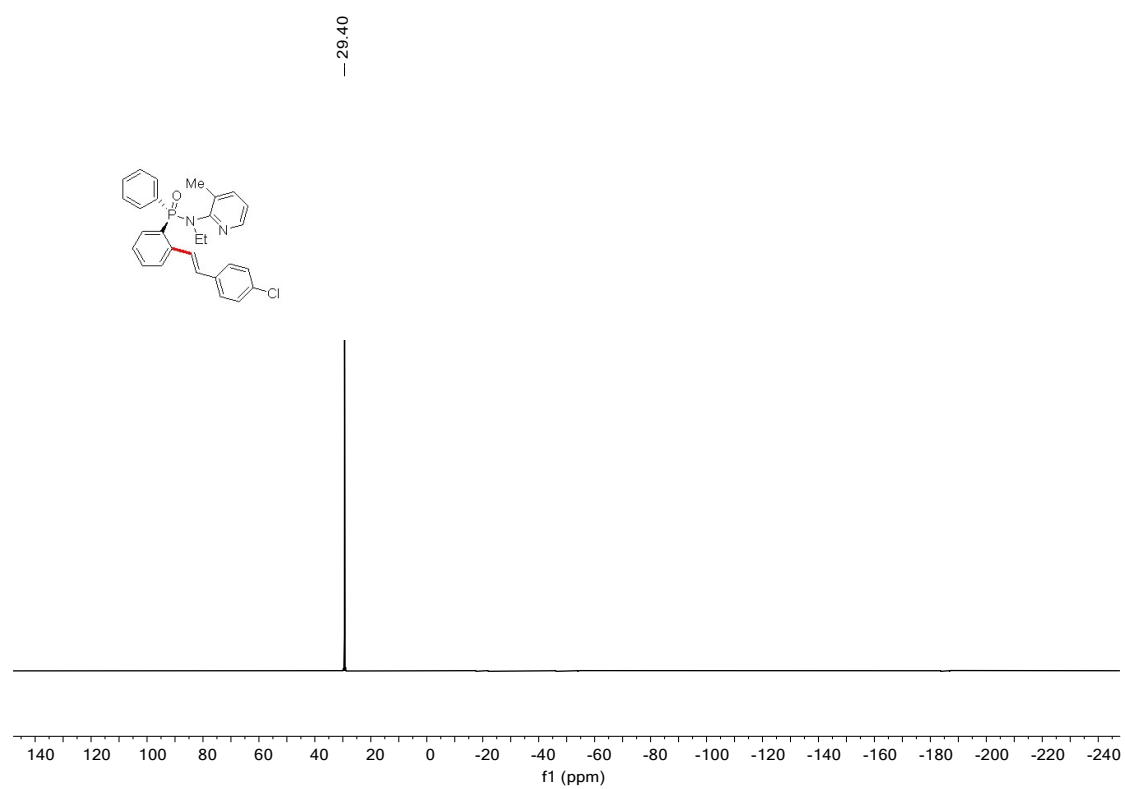

**3z, <sup>1</sup>H NMR, 400 MHz, CDCl<sub>3</sub>**

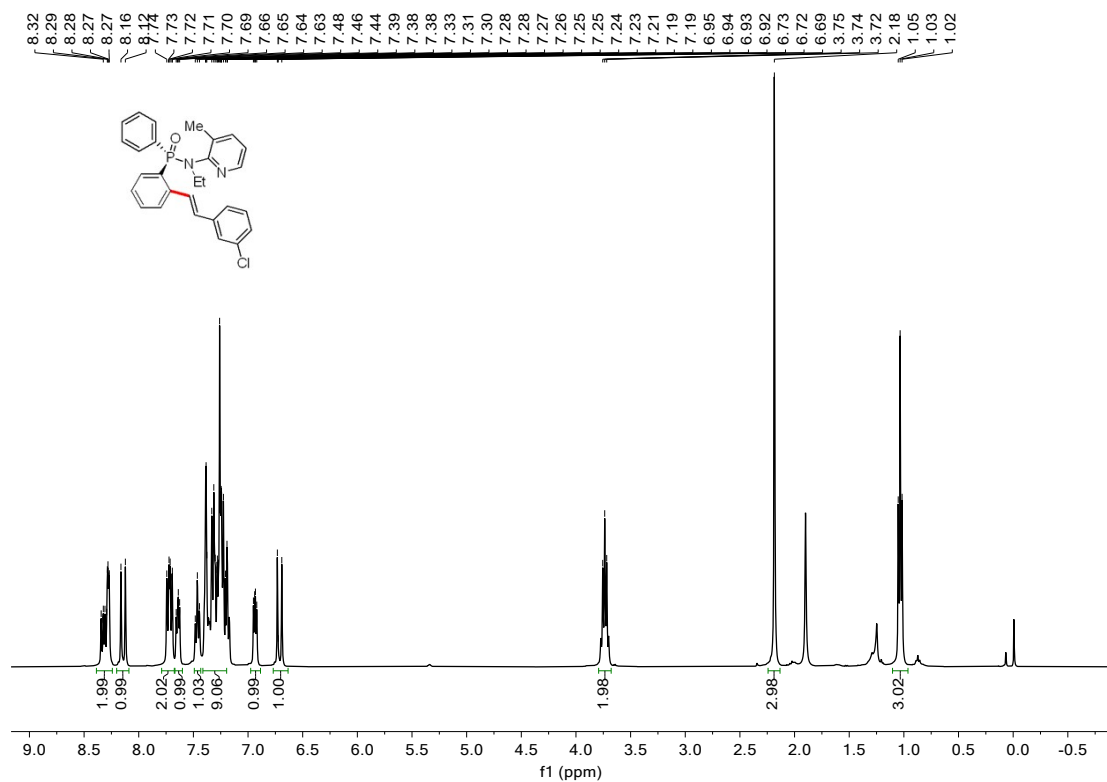

**3z, <sup>13</sup>C NMR, 101 MHz, CDCl<sub>3</sub>**

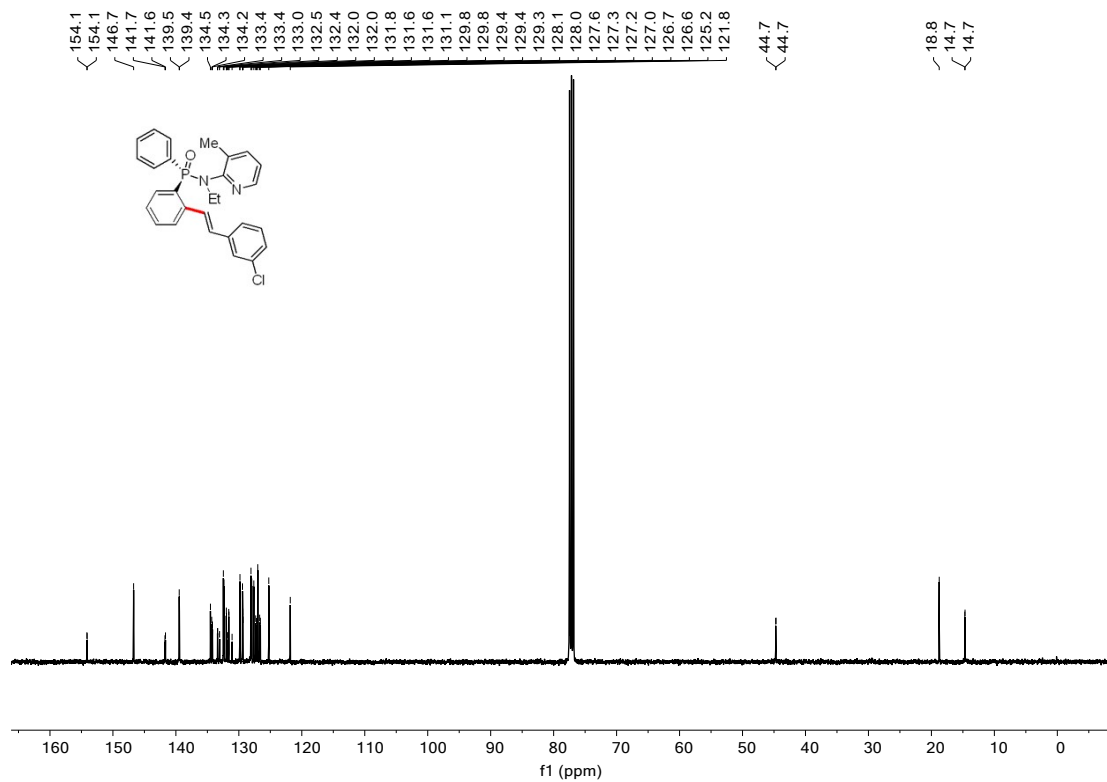

3z,  $^{31}\text{P}$  NMR, 162 MHz,  $\text{CDCl}_3$

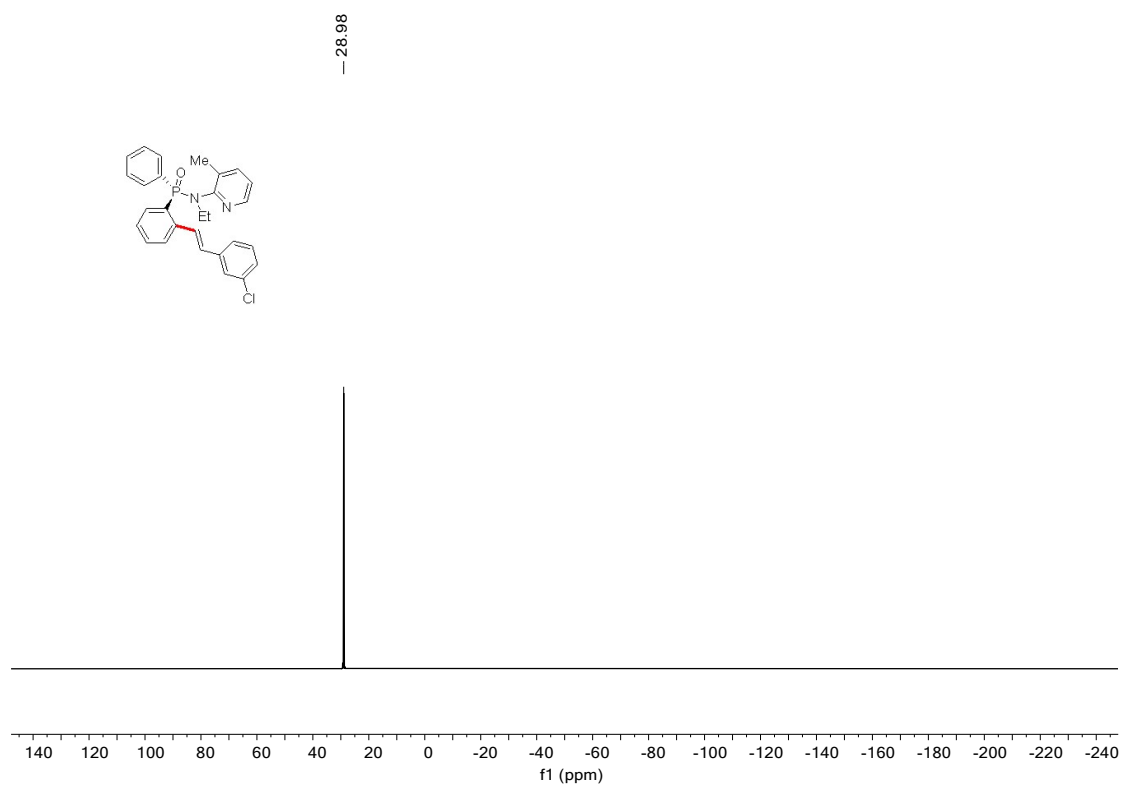

**3aa, <sup>1</sup>H NMR, 400 MHz, CDCl<sub>3</sub>**

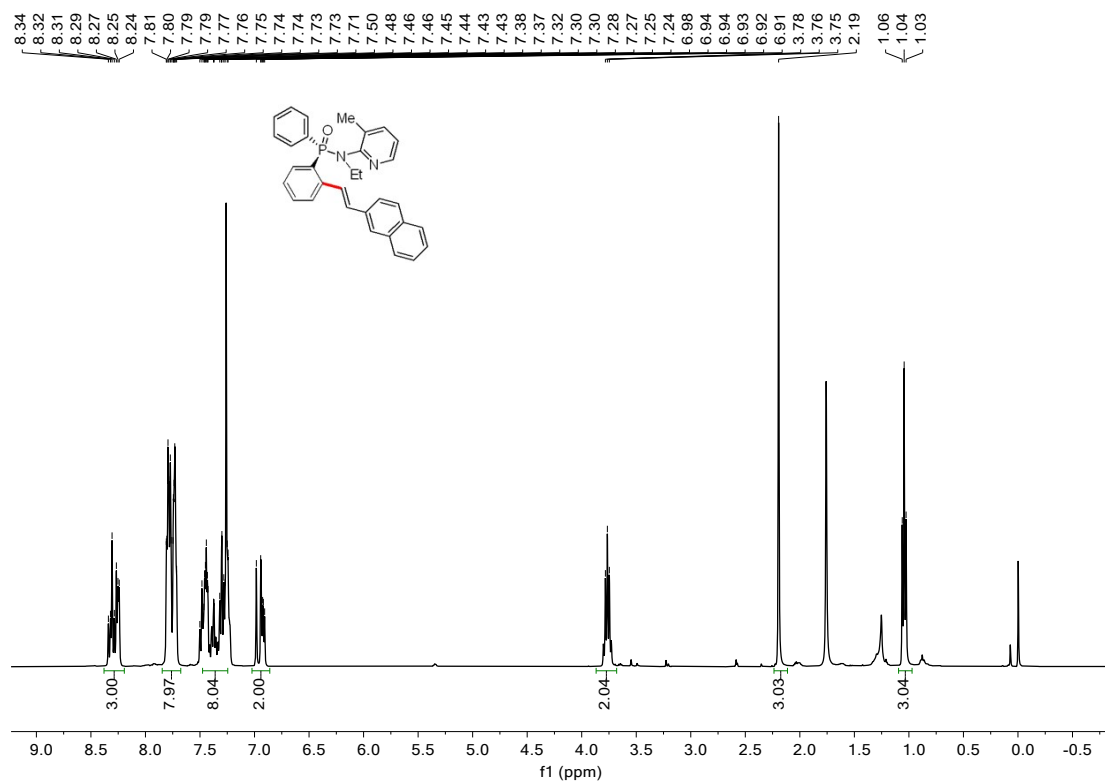

**3aa, <sup>13</sup>C NMR, 101 MHz, CDCl<sub>3</sub>**

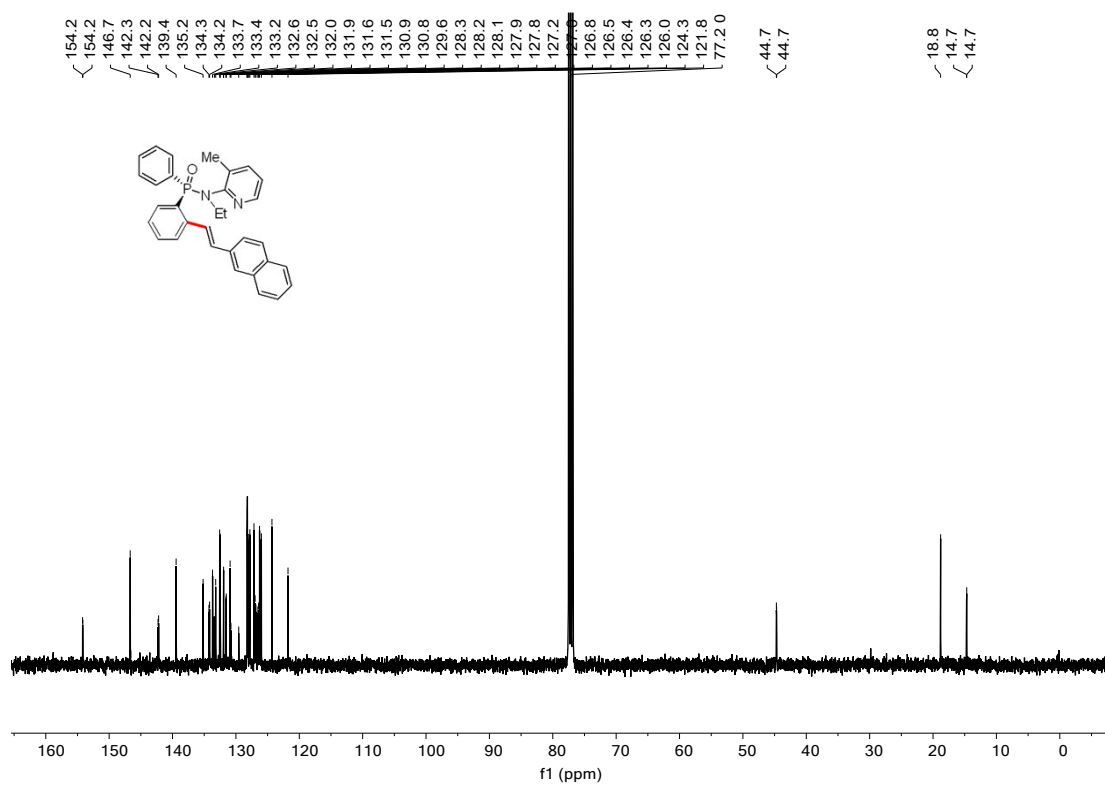



**3aa,  $^{31}\text{P}$  NMR, 162 MHz,  $\text{CDCl}_3$**

-29.19

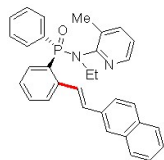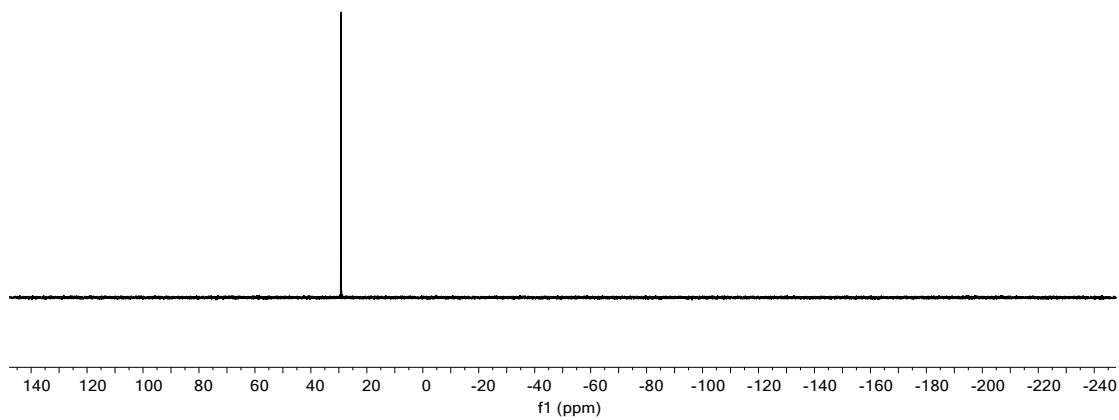

**3ab, <sup>1</sup>H NMR, 400 MHz, CDCl<sub>3</sub>**

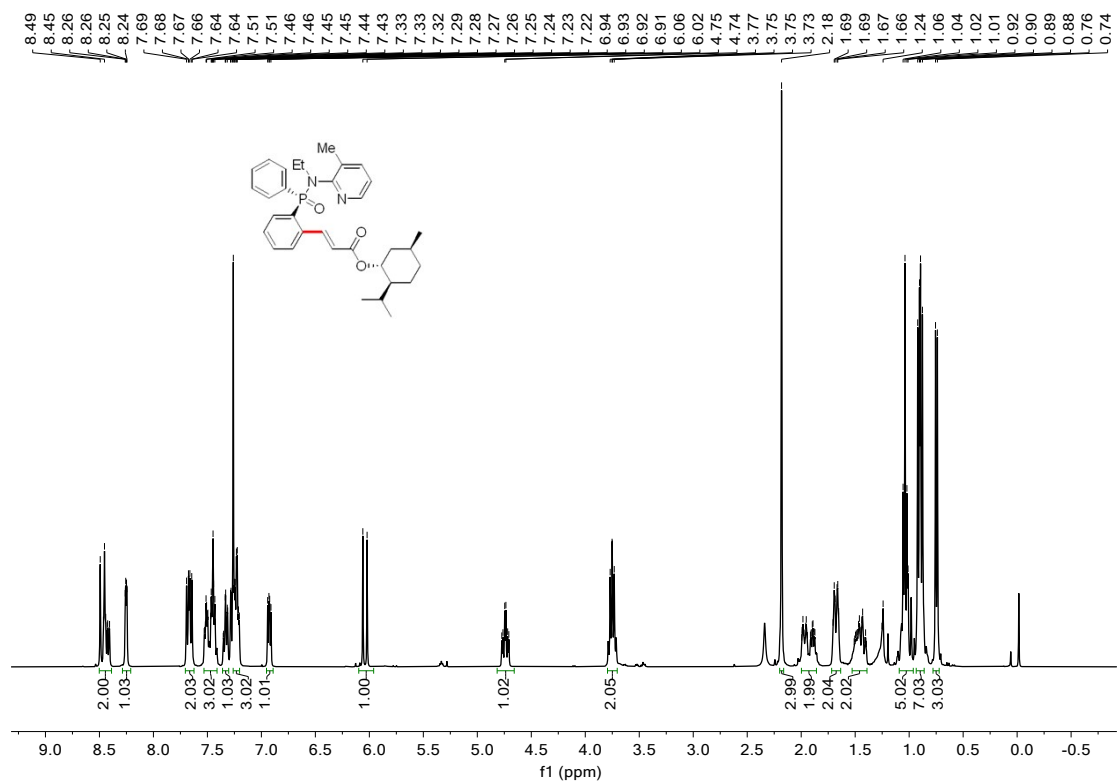

**3ab, <sup>13</sup>C NMR, 101 MHz, CDCl<sub>3</sub>**

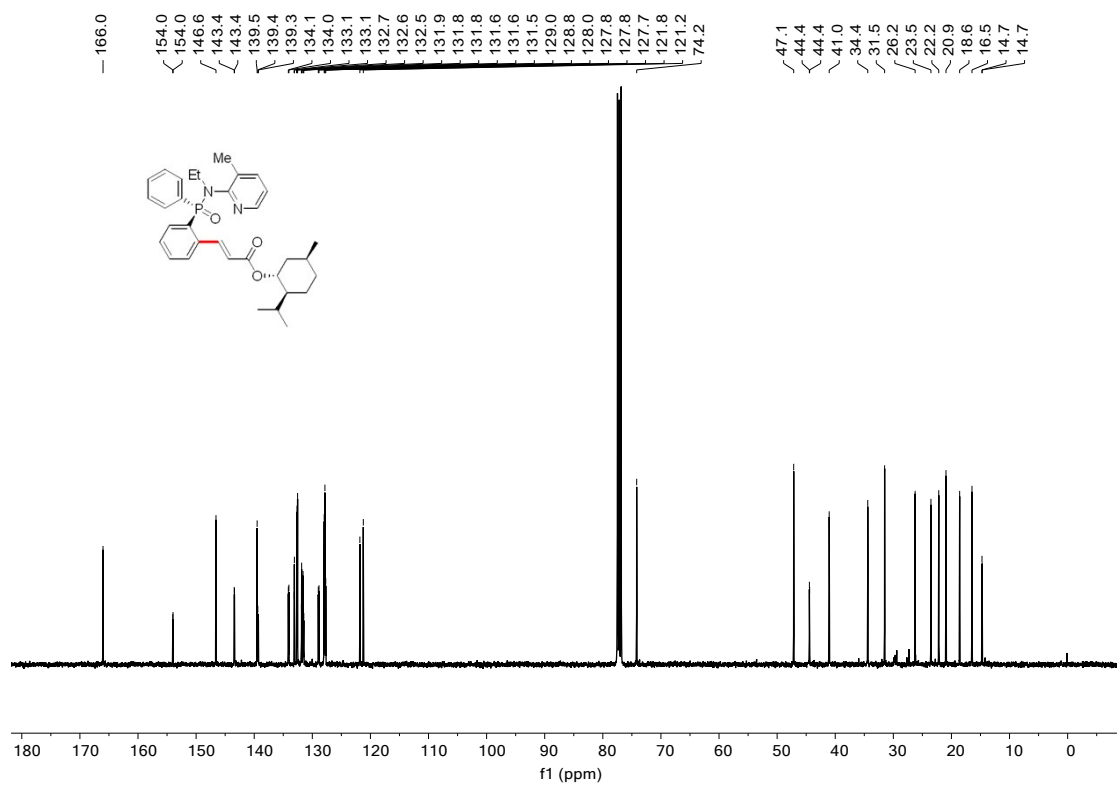

**3ab,  $^{31}\text{P}$  NMR, 162 MHz,  $\text{CDCl}_3$**

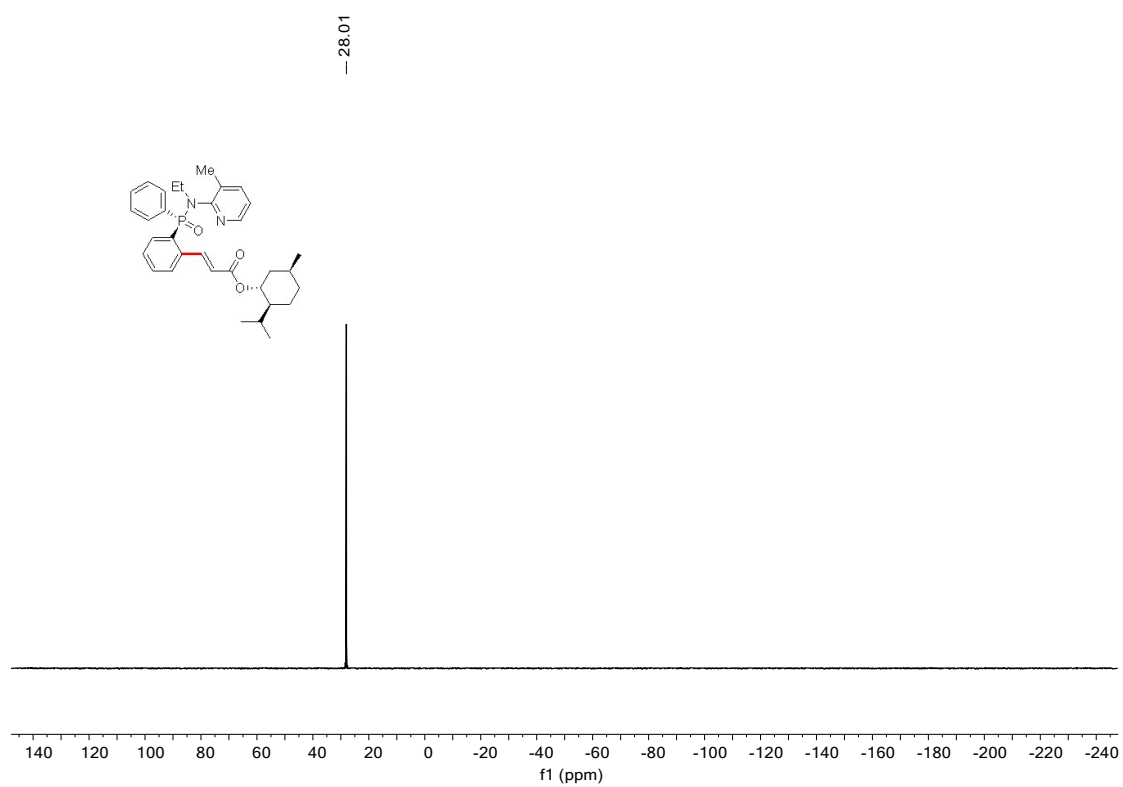

**3ac, <sup>1</sup>H NMR, 400 MHz, CDCl<sub>3</sub>**

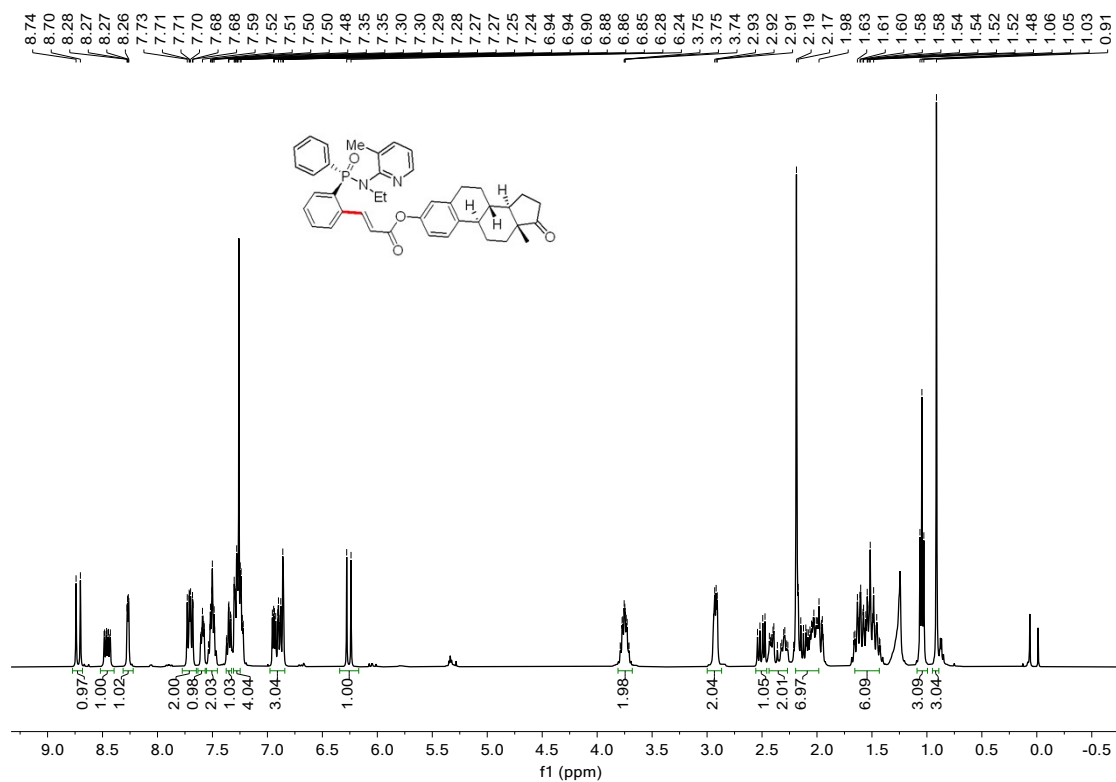

**3ac, <sup>13</sup>C NMR, 101 MHz, CDCl<sub>3</sub>**

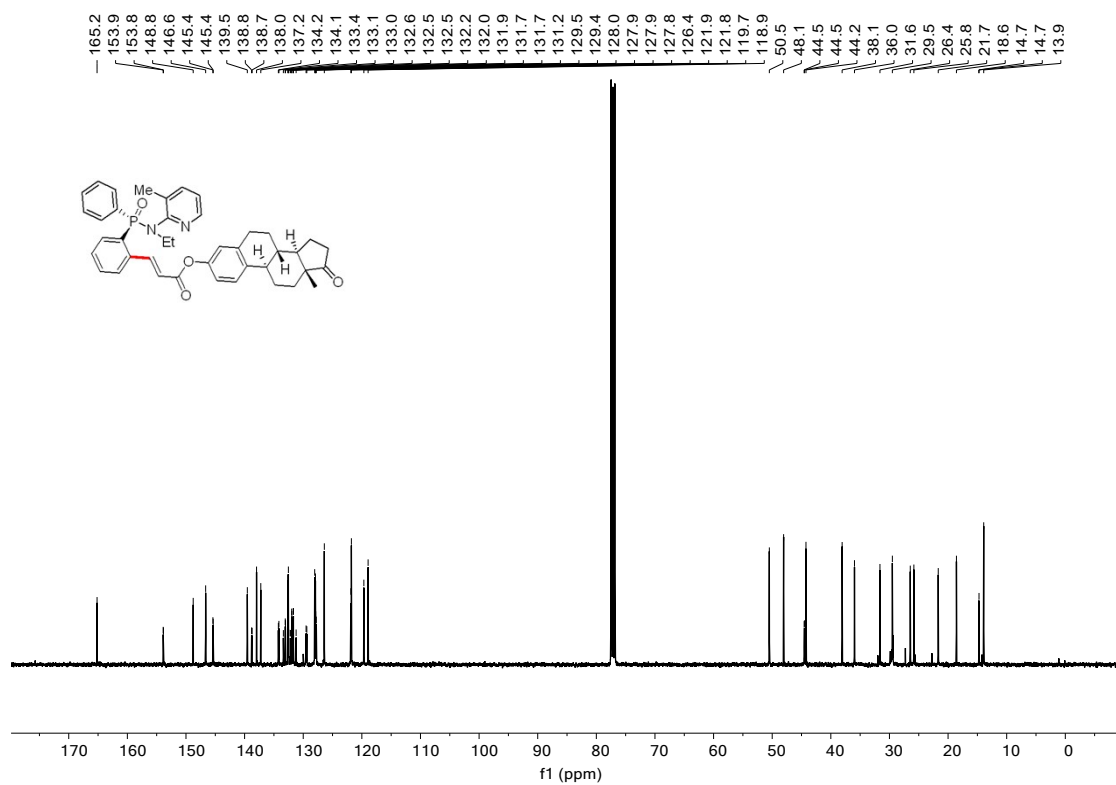

**3ac,  $^{31}\text{P}$  NMR, 162 MHz,  $\text{CDCl}_3$**

— 27.64

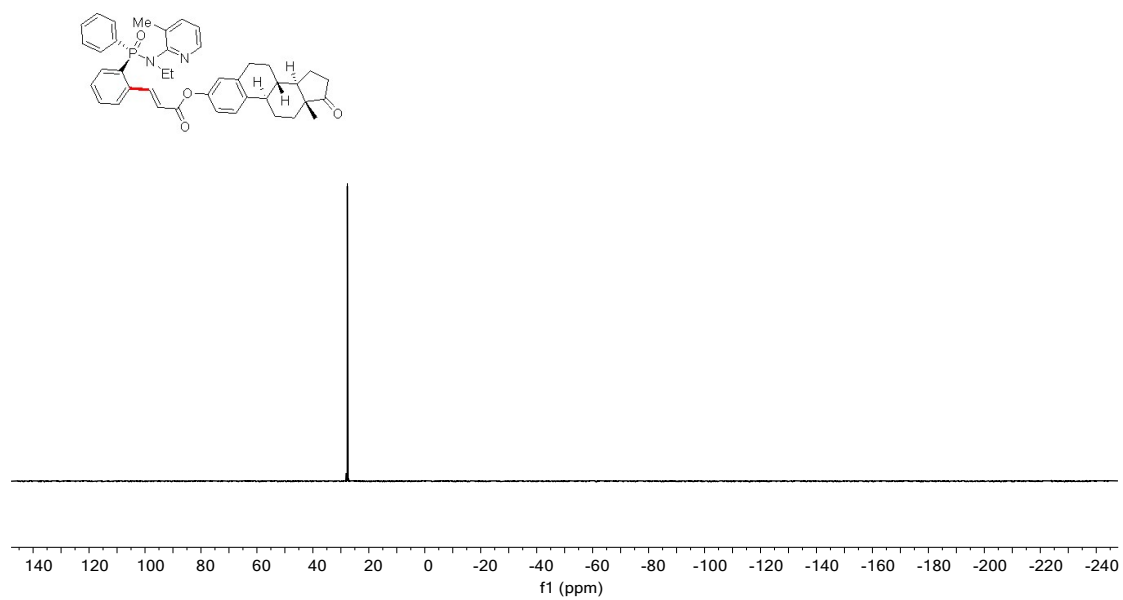

**3ad, <sup>1</sup>H NMR, 400 MHz, CDCl<sub>3</sub>**

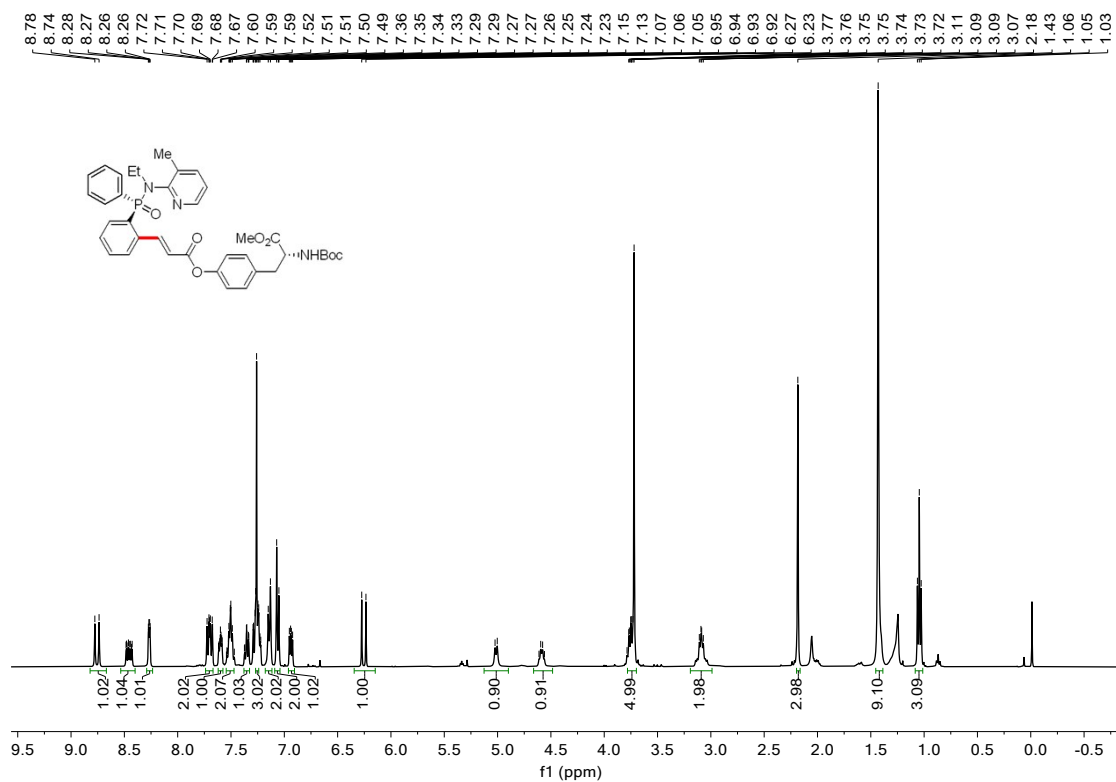

**3ad, <sup>13</sup>C NMR, 101 MHz, CDCl<sub>3</sub>**

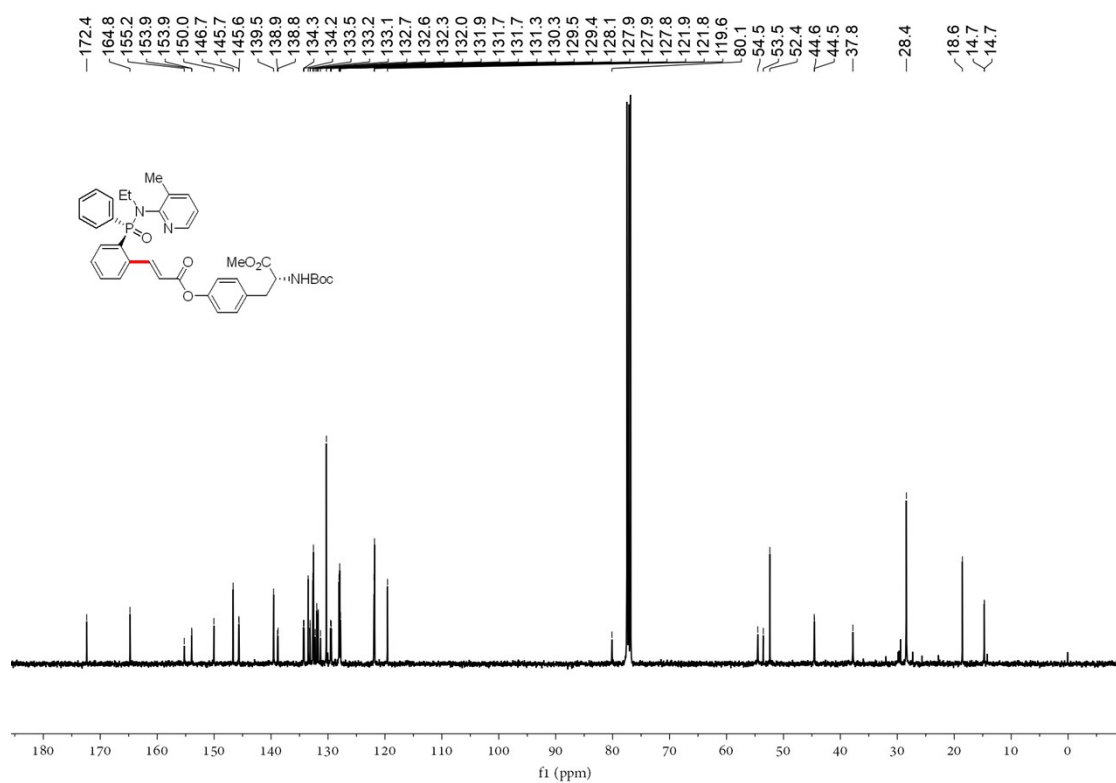

**3ad,  $^{31}\text{P}$  NMR, 162 MHz,  $\text{CDCl}_3$**

— 27.60

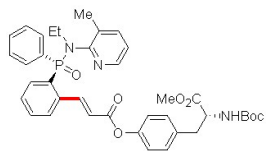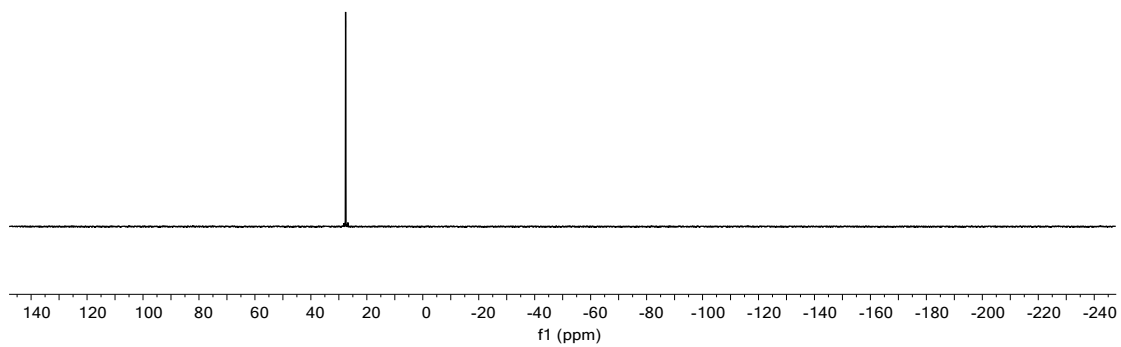

**(R)-7d, <sup>1</sup>H NMR, 400 MHz, CDCl<sub>3</sub>**

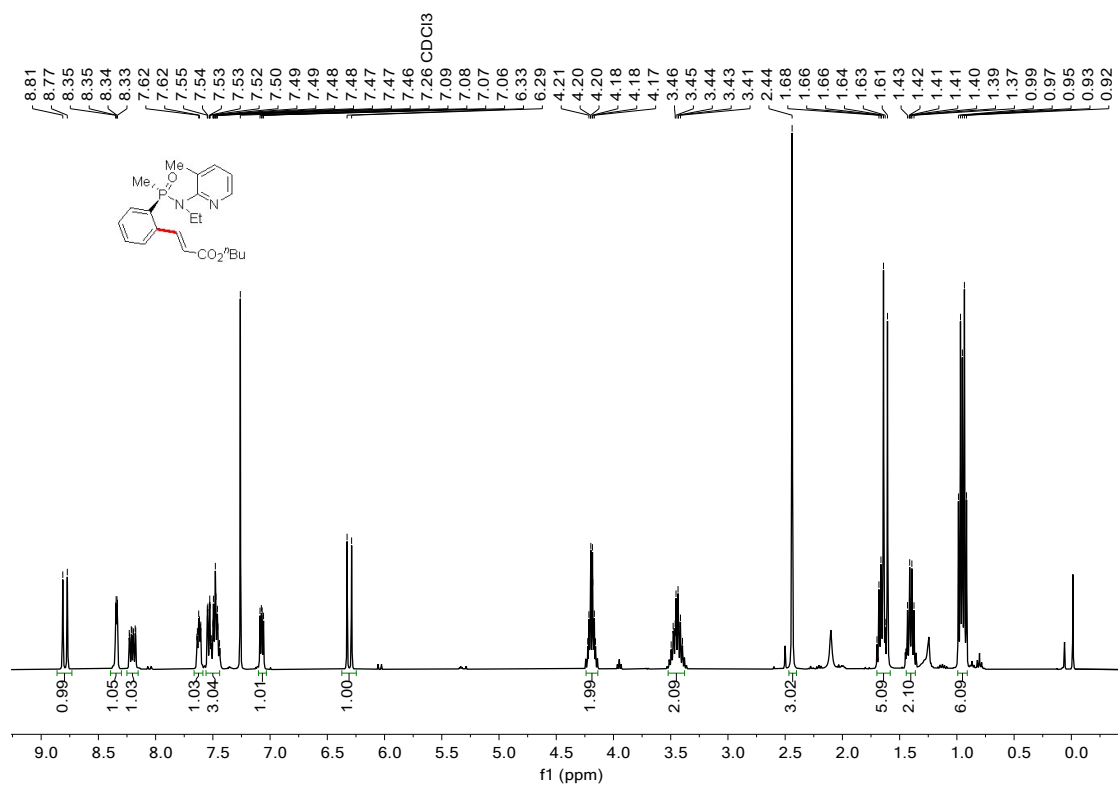

**(R)-7d, <sup>13</sup>C NMR, 101 MHz, CDCl<sub>3</sub>**

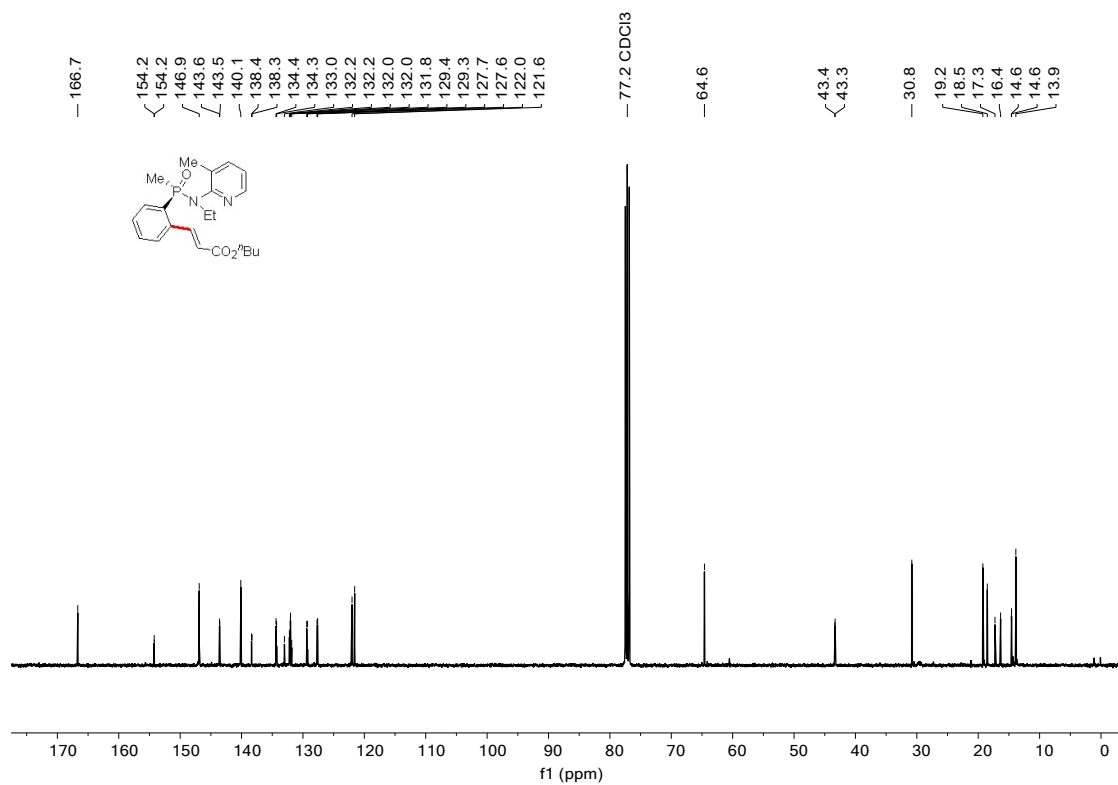



**(R)-7d,  $^{31}\text{P}$  NMR, 162 MHz,  $\text{CDCl}_3$**

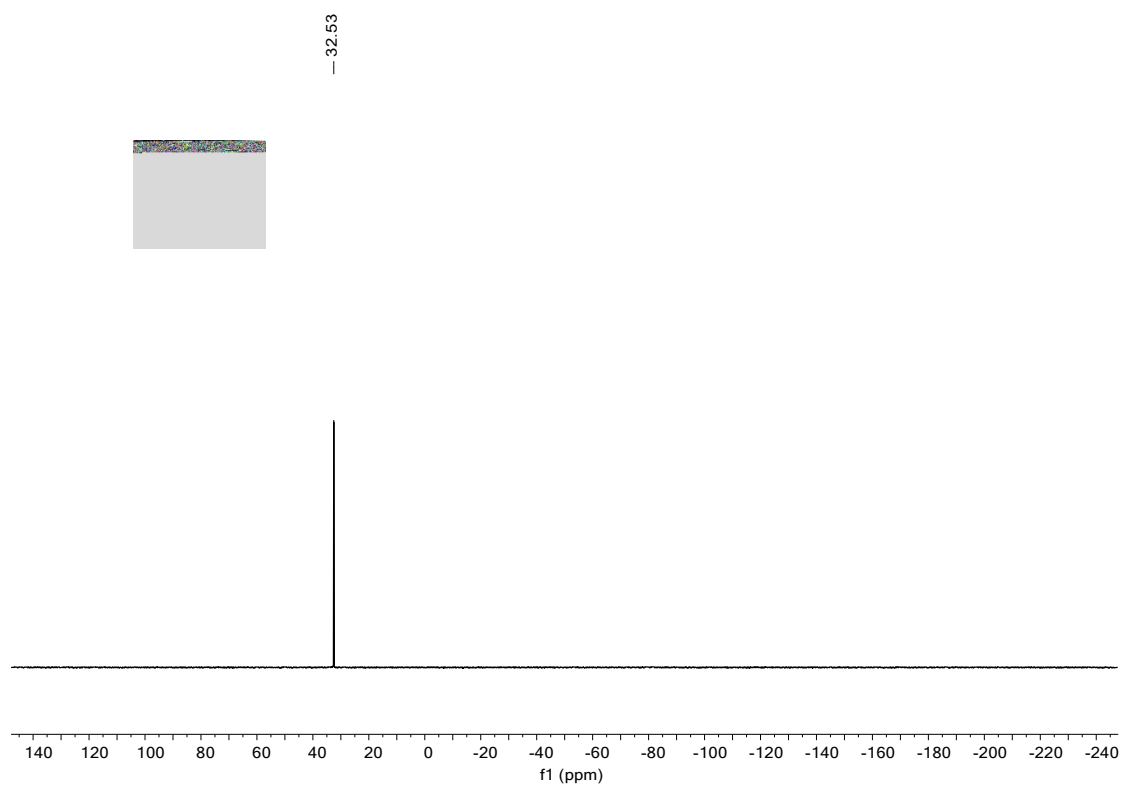

(R)-7e, <sup>1</sup>H NMR, 400 MHz, CDCl<sub>3</sub>

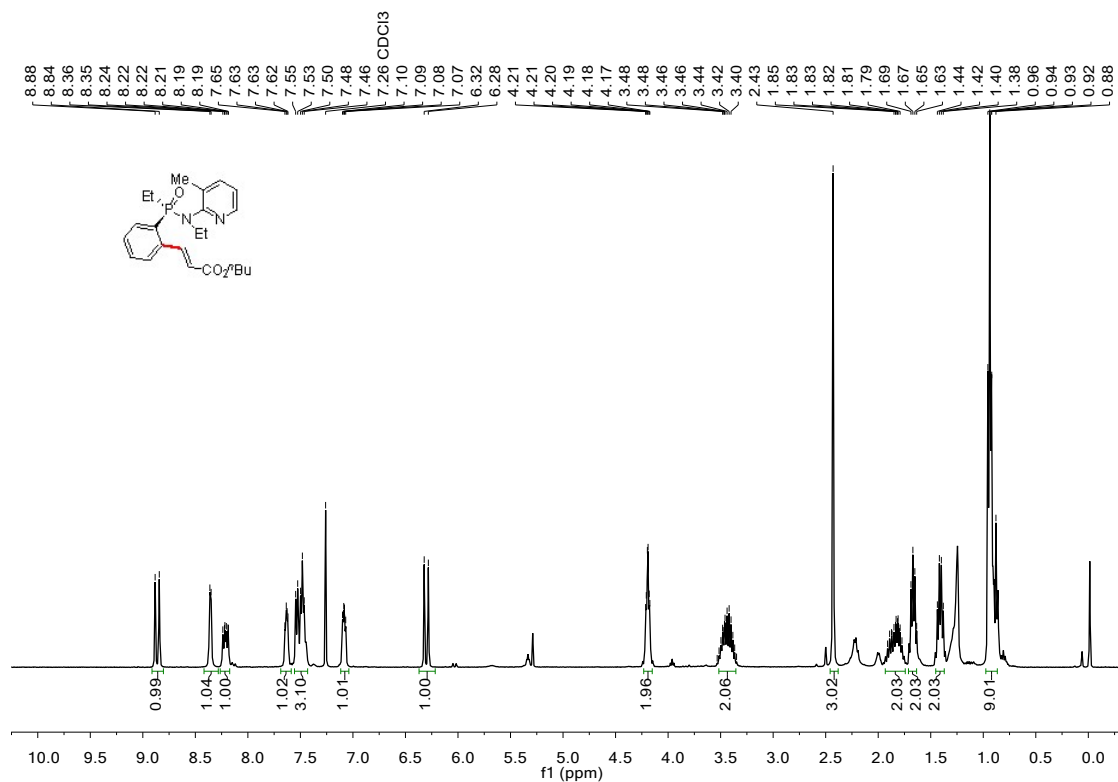

(R)-7e, <sup>13</sup>C NMR, 101 MHz, CDCl<sub>3</sub>

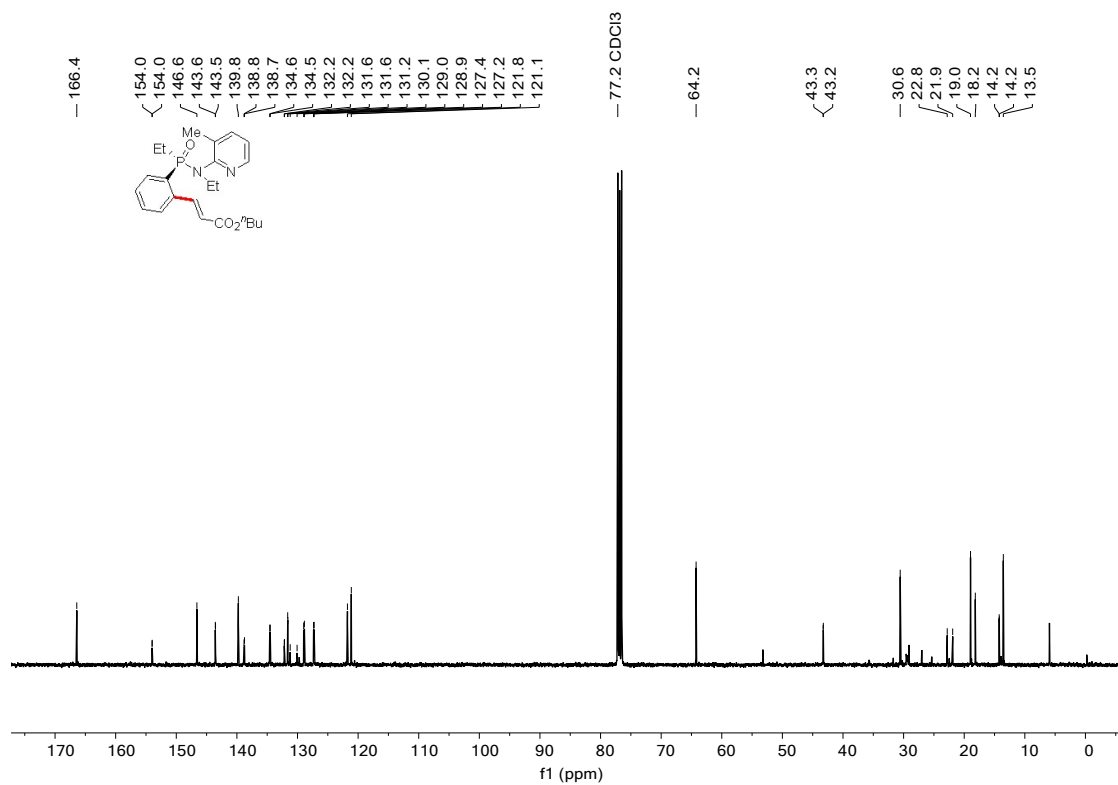

**(R)-7e, <sup>31</sup>P NMR, 162 MHz, CDCl<sub>3</sub>**

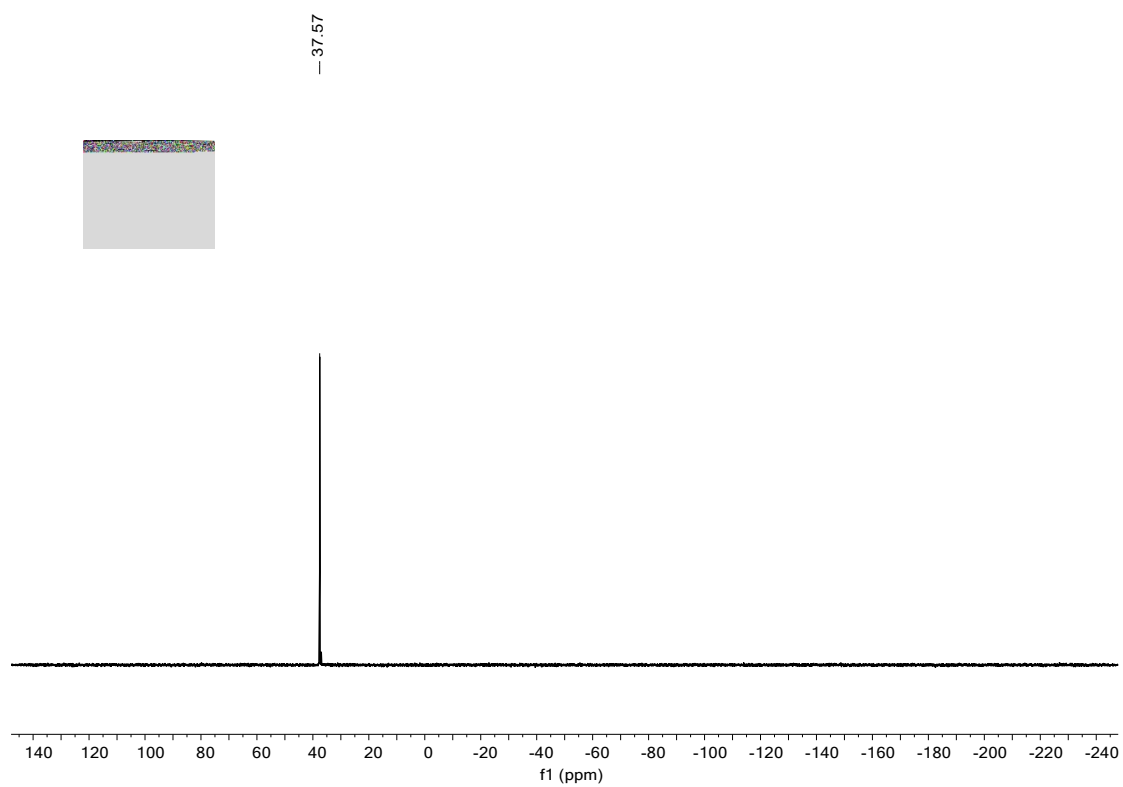

**(R)-7f, <sup>1</sup>H NMR, 400 MHz, CDCl<sub>3</sub>**

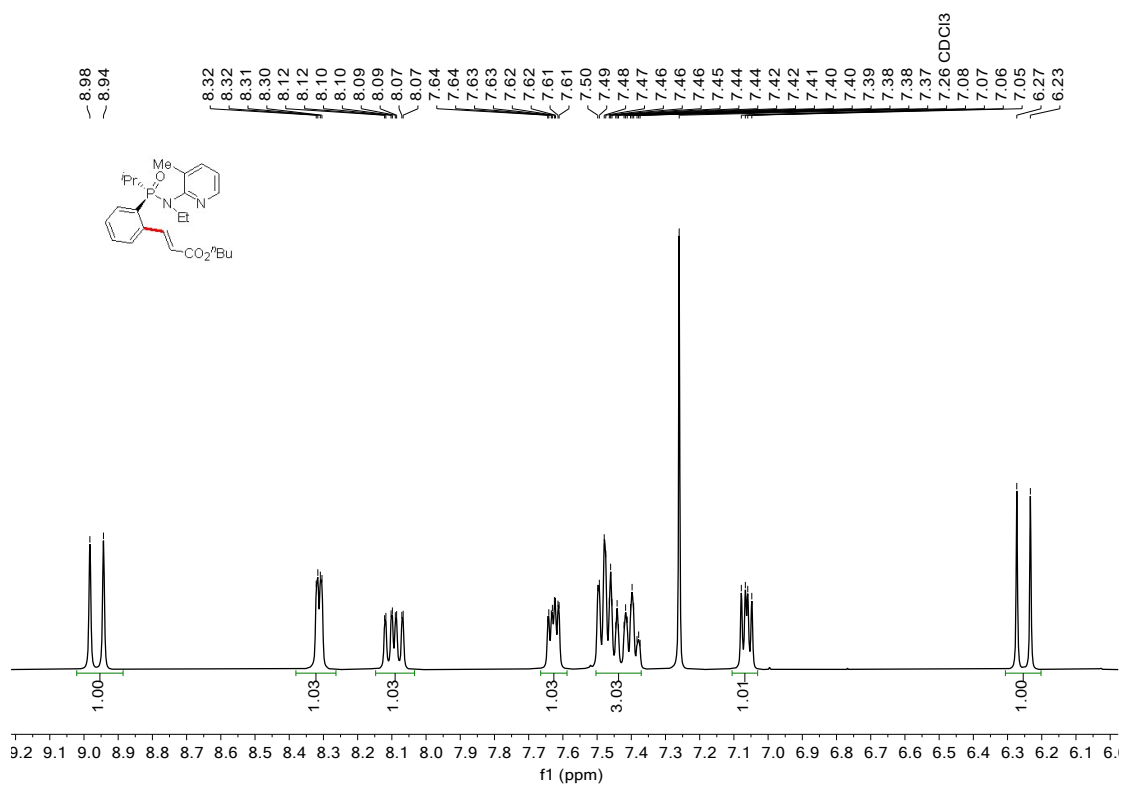

**(R)-7f, <sup>13</sup>C NMR, 101 MHz, CDCl<sub>3</sub>**

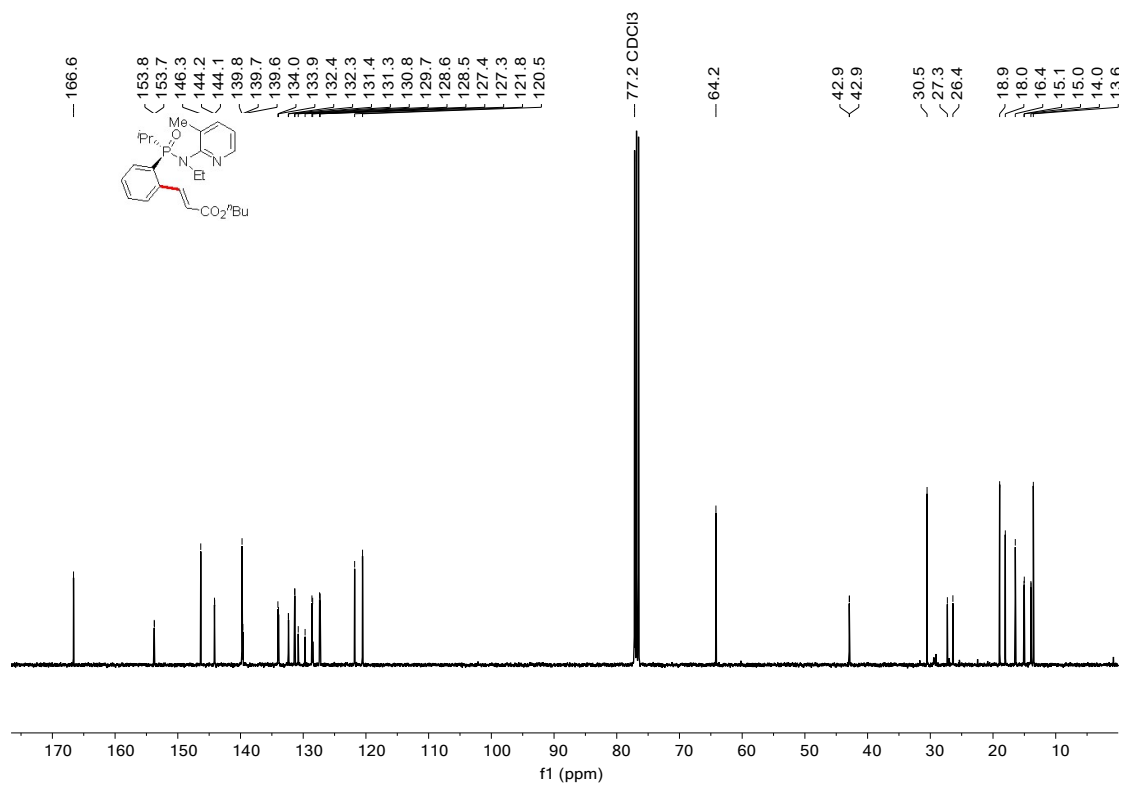

**(R)-7f, <sup>31</sup>P NMR, 162 MHz, CDCl<sub>3</sub>**

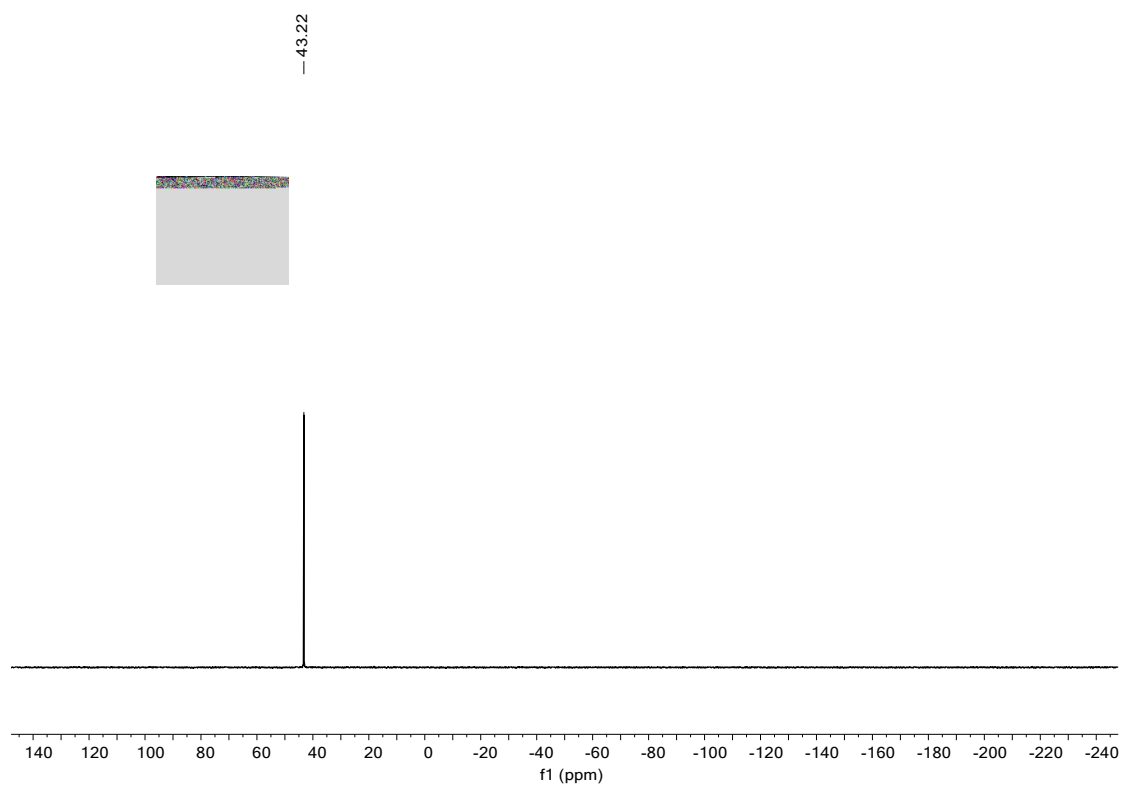

6w, <sup>1</sup>H NMR, 400 MHz, CDCl<sub>3</sub>

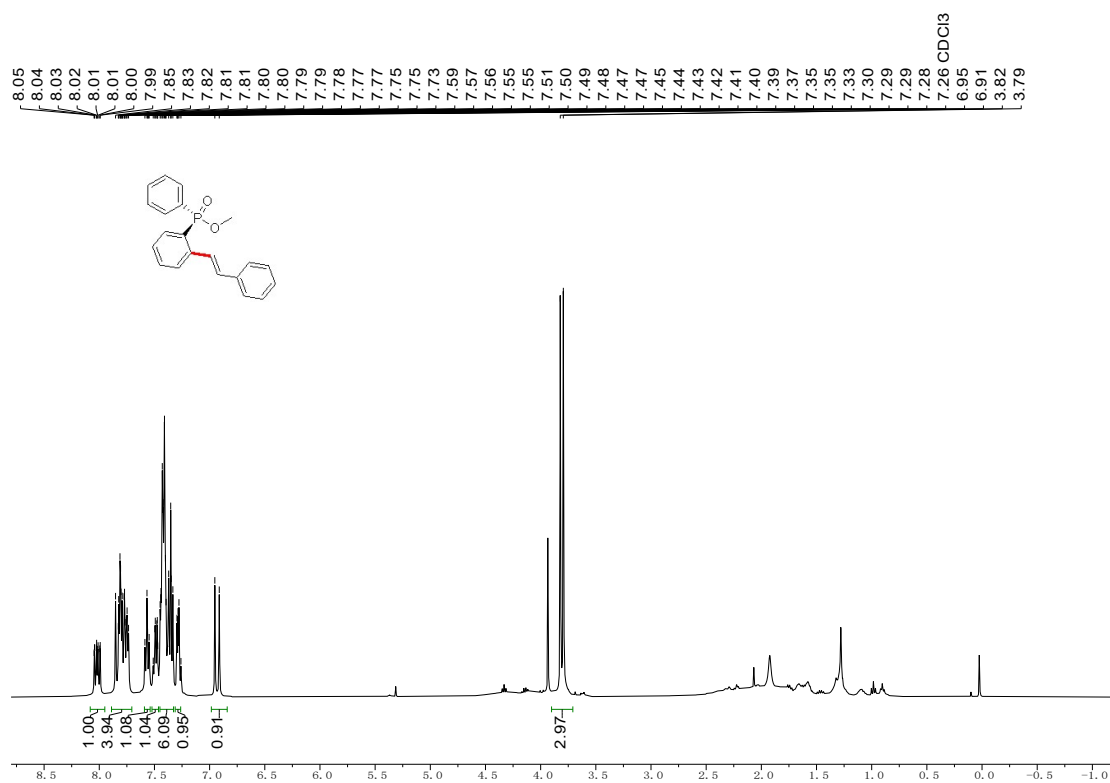

6w, <sup>13</sup>C NMR, 101 MHz, CDCl<sub>3</sub>

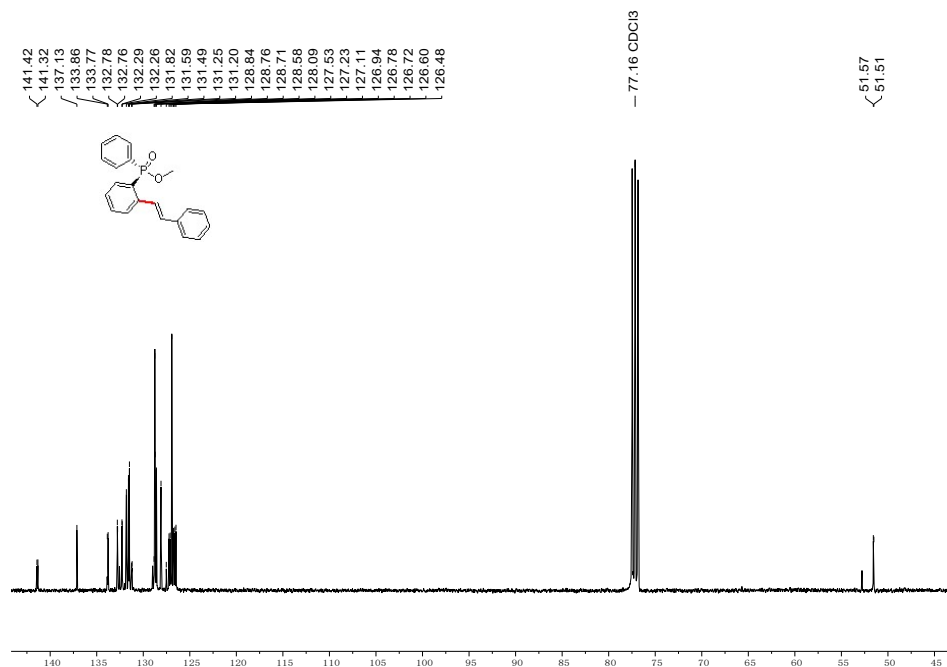

6w,  $^{31}\text{P}$  NMR, 162 MHz,  $\text{CDCl}_3$

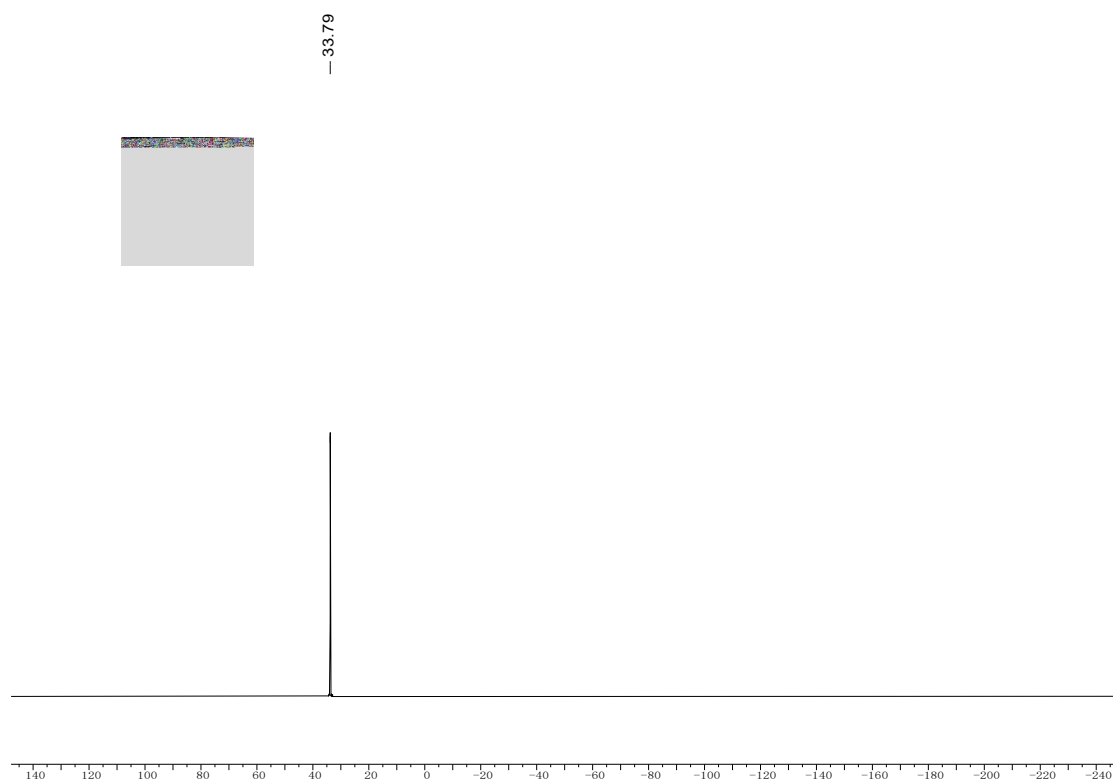

**7a, <sup>1</sup>H NMR, 400 MHz, CDCl<sub>3</sub>**

7.75  
7.74  
7.74  
7.73  
7.73  
7.71  
7.70  
7.66  
7.56  
7.54  
7.52  
7.49  
7.48  
7.48  
7.47  
7.47  
7.46  
7.45  
7.44  
7.43  
7.42  
7.38  
7.36  
7.34  
7.34  
7.31  
7.30  
7.28  
7.28  
7.27  
7.26  
7.25  
7.24  
7.23  
6.90  
6.86

2.07  
2.03

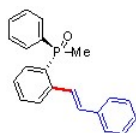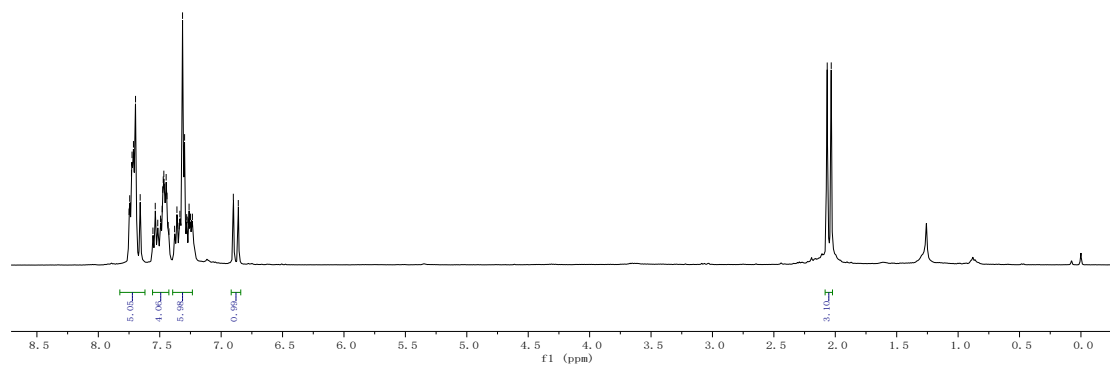

**7a, <sup>13</sup>C NMR, 101 MHz, CDCl<sub>3</sub>**

141.5  
136.9  
135.1  
132.4  
132.3  
131.9  
131.9  
131.6  
130.6  
130.6  
129.5  
129.5  
128.8  
128.8  
127.2  
127.0  
126.9  
126.8

17.6  
16.9

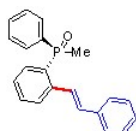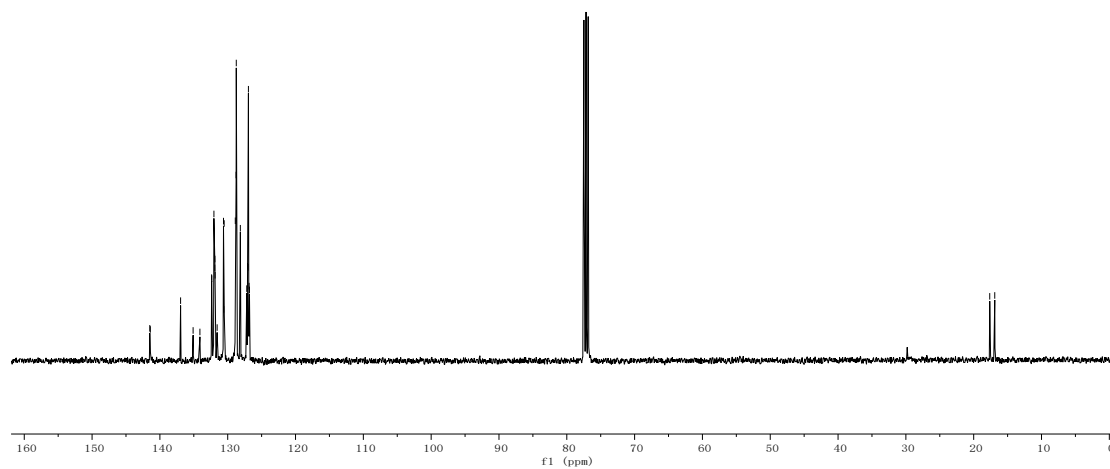



7a, <sup>31</sup>P NMR, 162 MHz, CDCl<sub>3</sub>

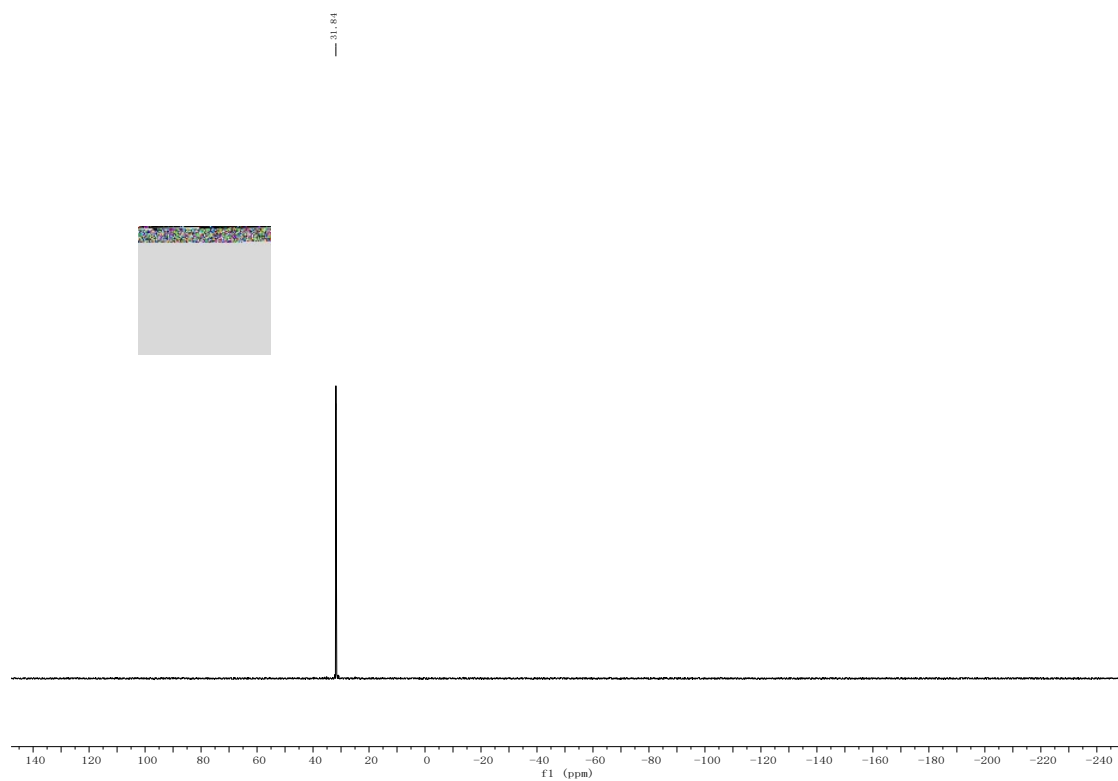

**7b, <sup>1</sup>H NMR, 400 MHz, CDCl<sub>3</sub>**

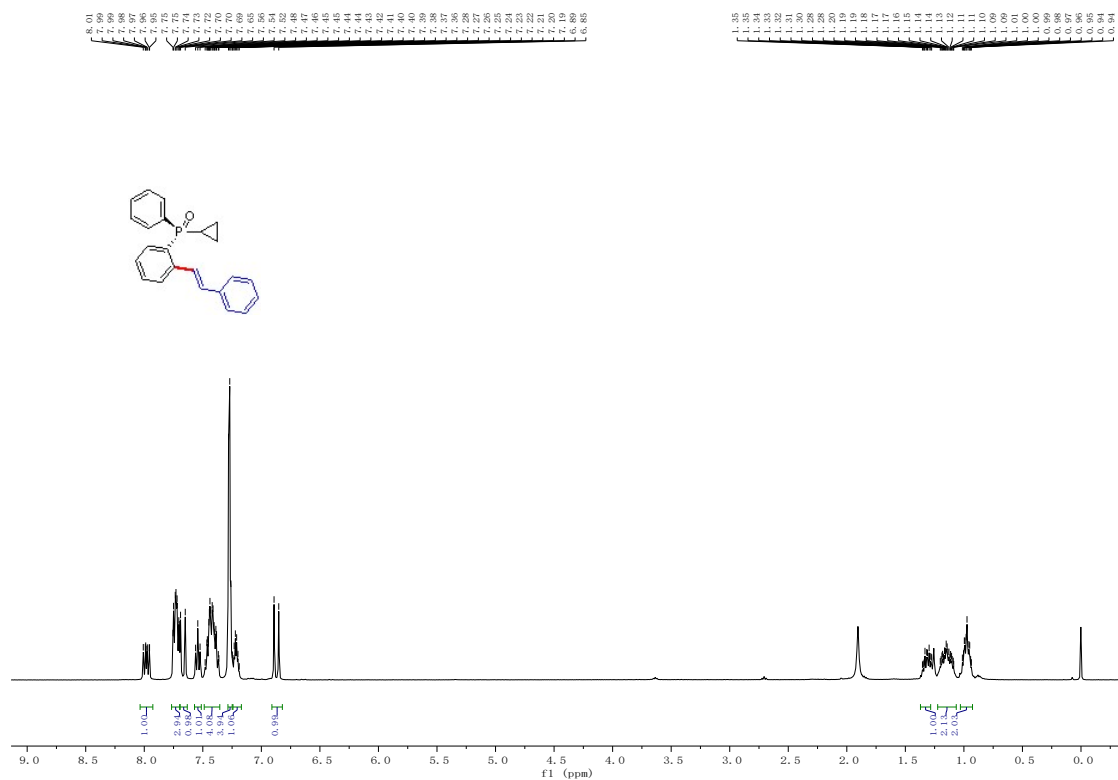

**7b, <sup>13</sup>C NMR, 101 MHz, CDCl<sub>3</sub>**

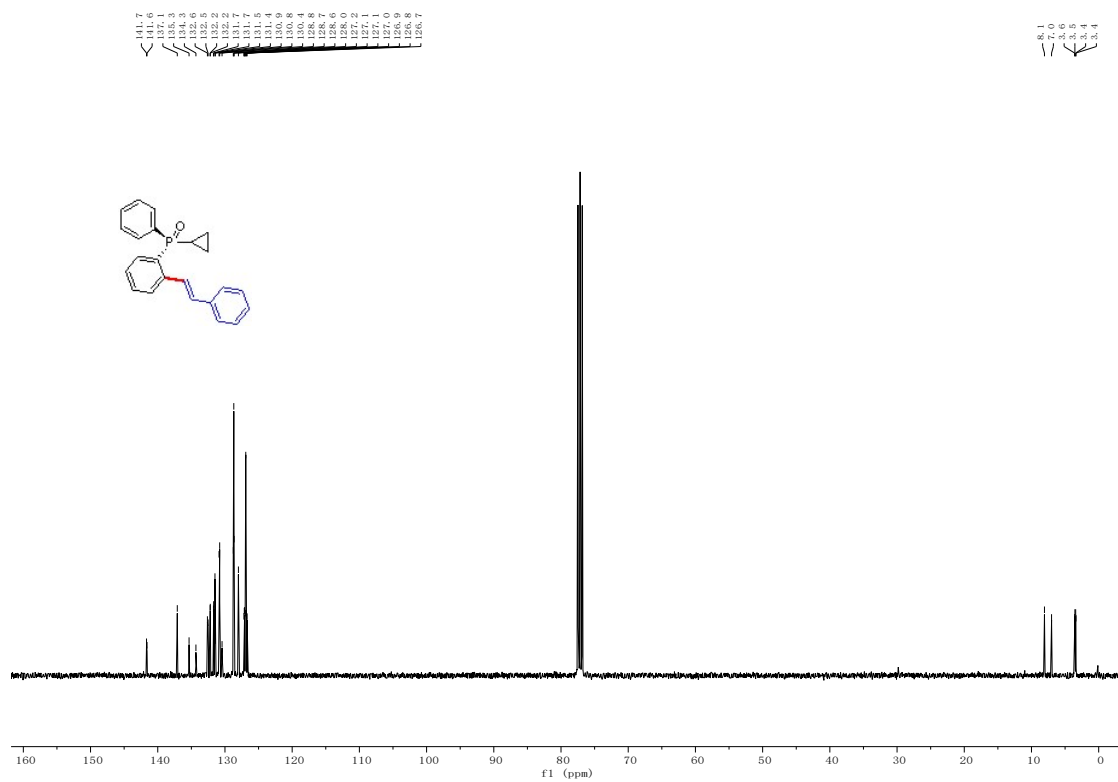

7b,  $^{31}\text{P}$  NMR, 162 MHz,  $\text{CDCl}_3$

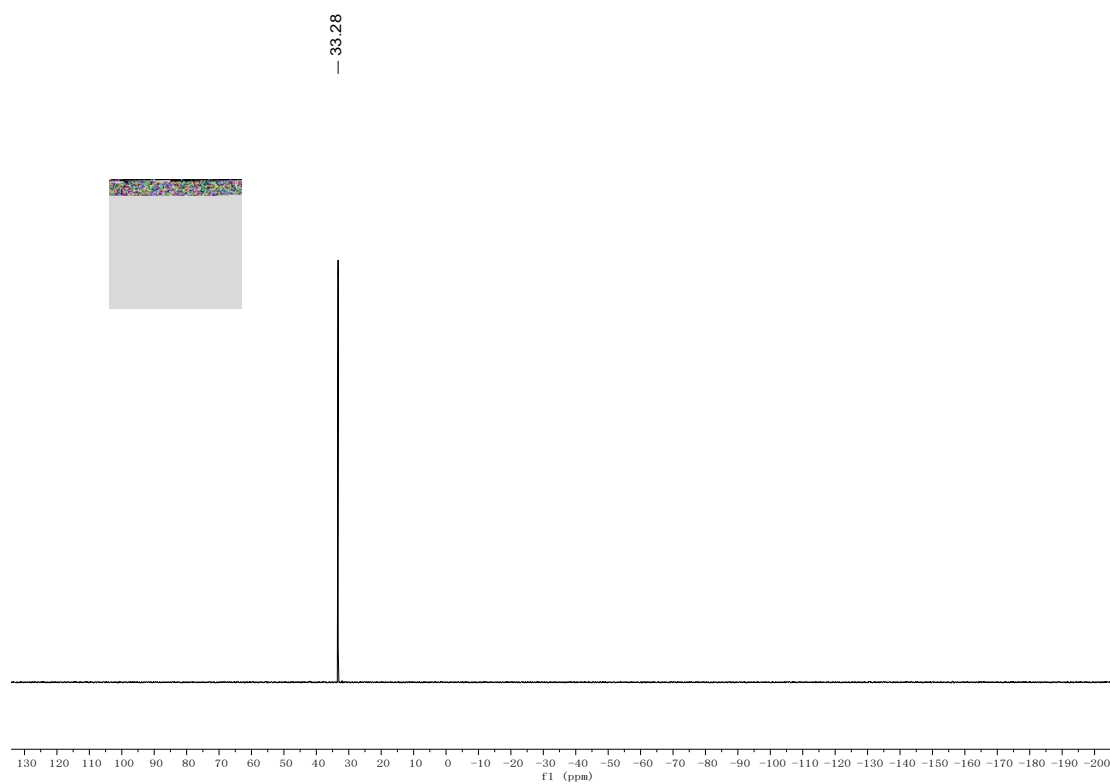

7c, <sup>1</sup>H NMR, 400 MHz, CDCl<sub>3</sub>

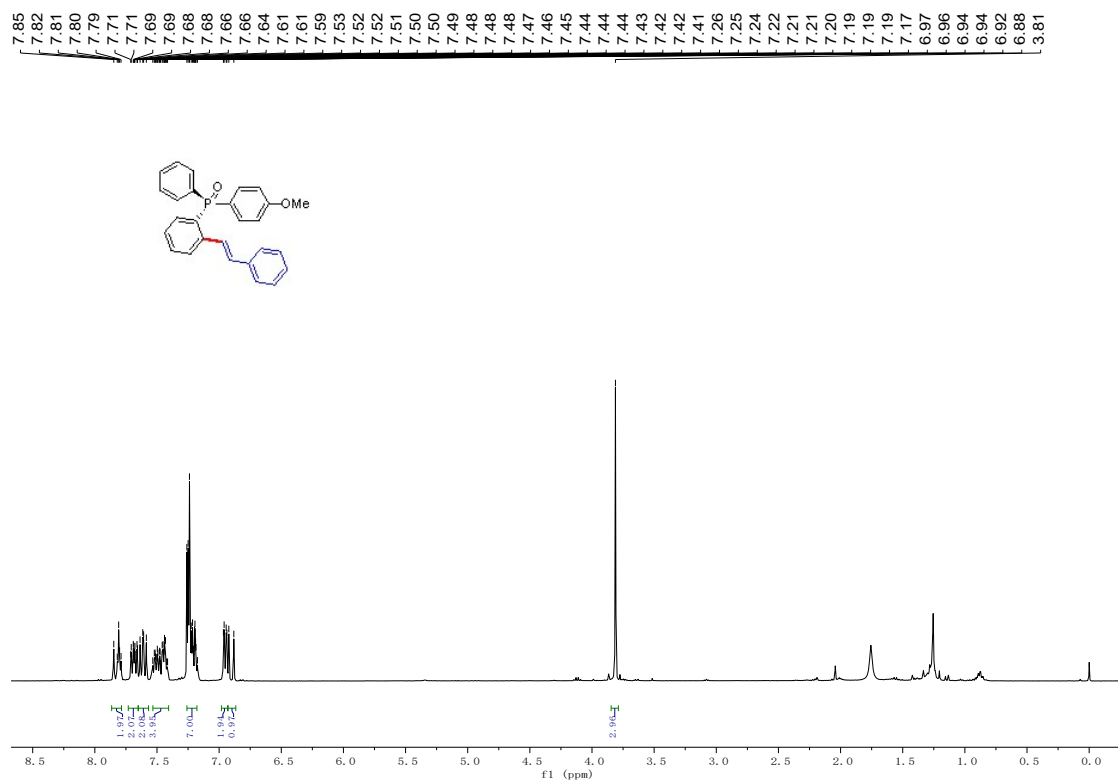

7c, <sup>13</sup>C NMR, 101 MHz, CDCl<sub>3</sub>

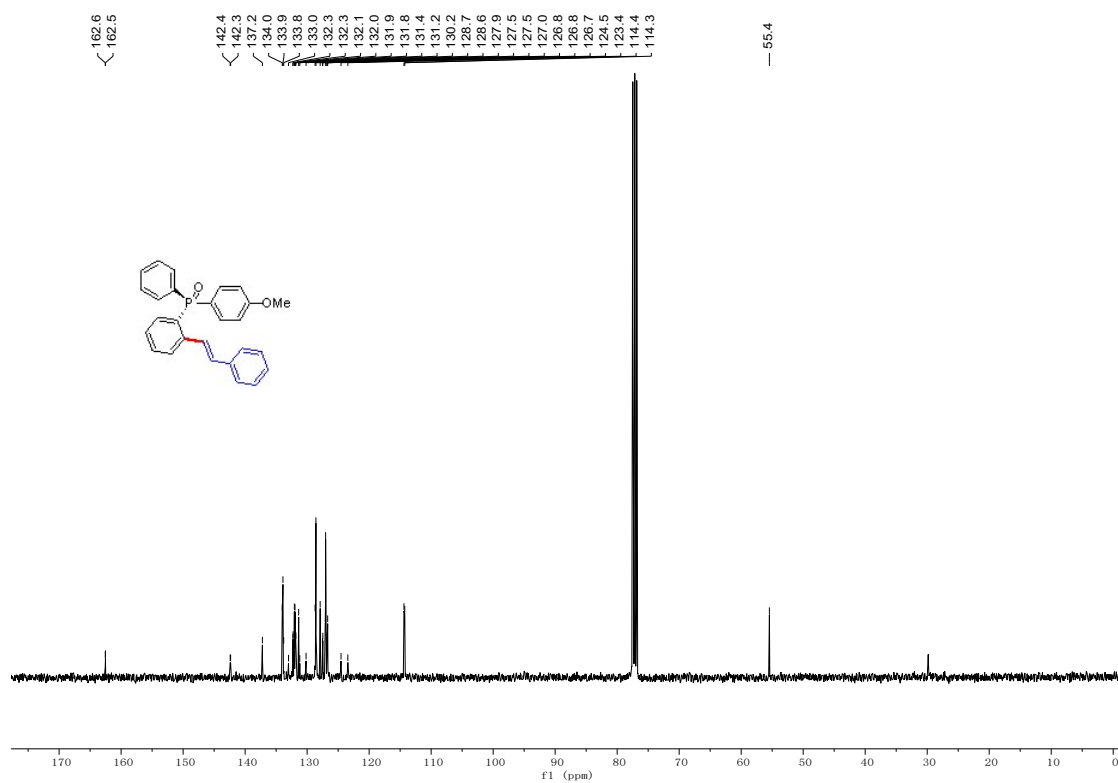

7c, <sup>31</sup>P NMR, 162 MHz, CDCl<sub>3</sub>

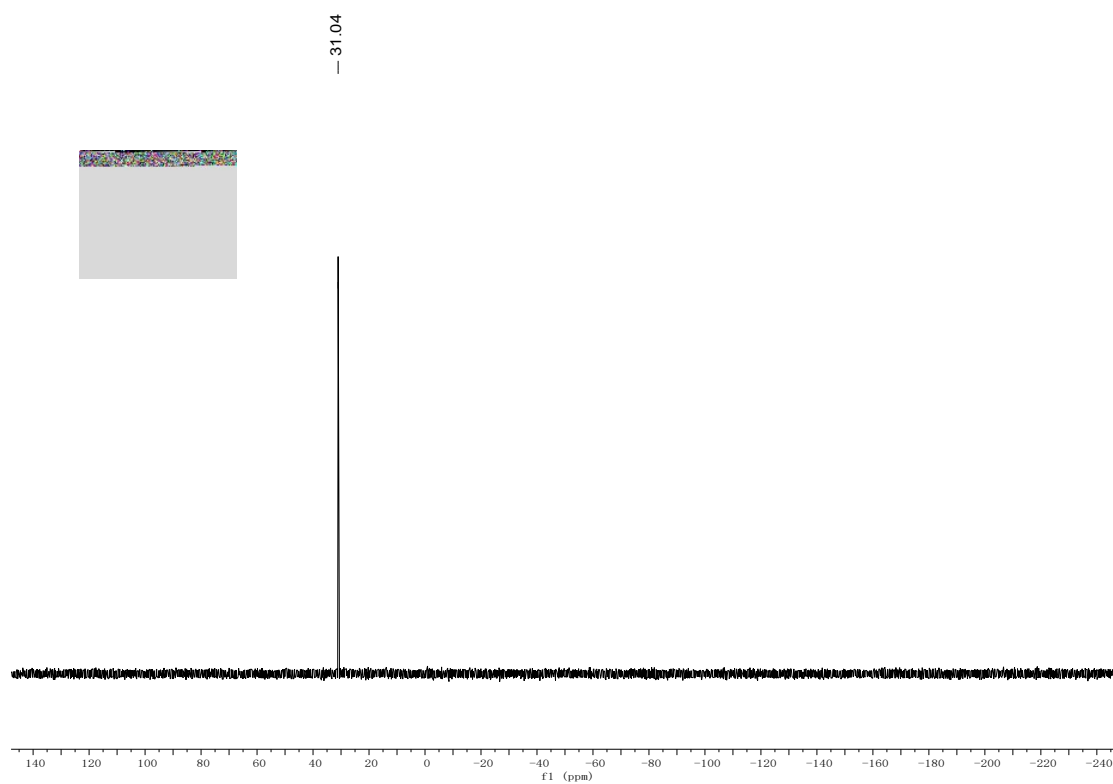

7d, <sup>1</sup>H NMR, 400 MHz, CDCl<sub>3</sub>

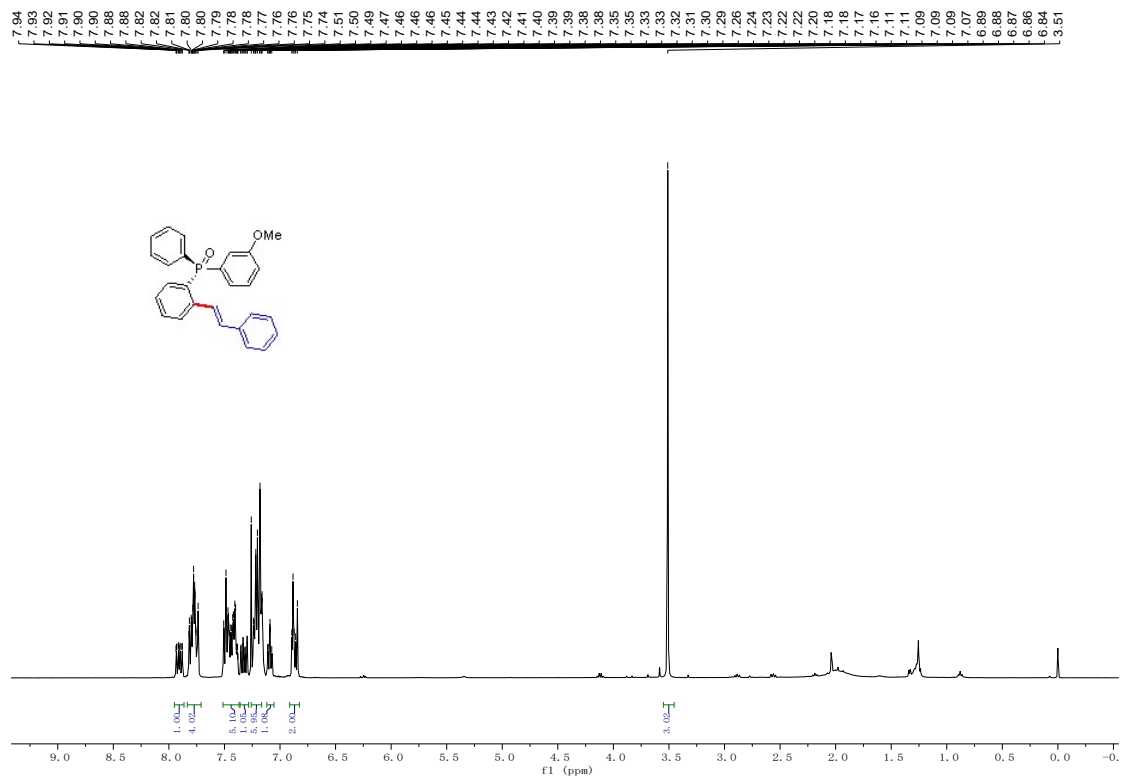

7d, <sup>13</sup>C NMR, 101 MHz, CDCl<sub>3</sub>

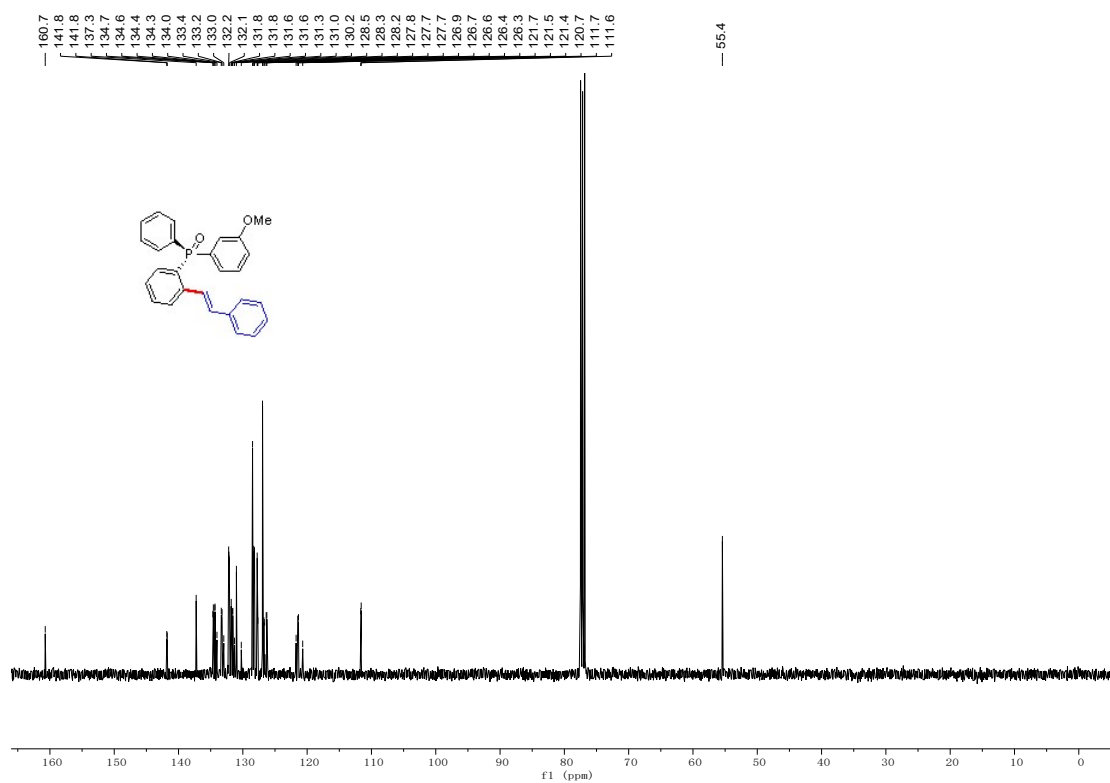

7d,  $^{31}\text{P}$  NMR, 162 MHz,  $\text{CDCl}_3$

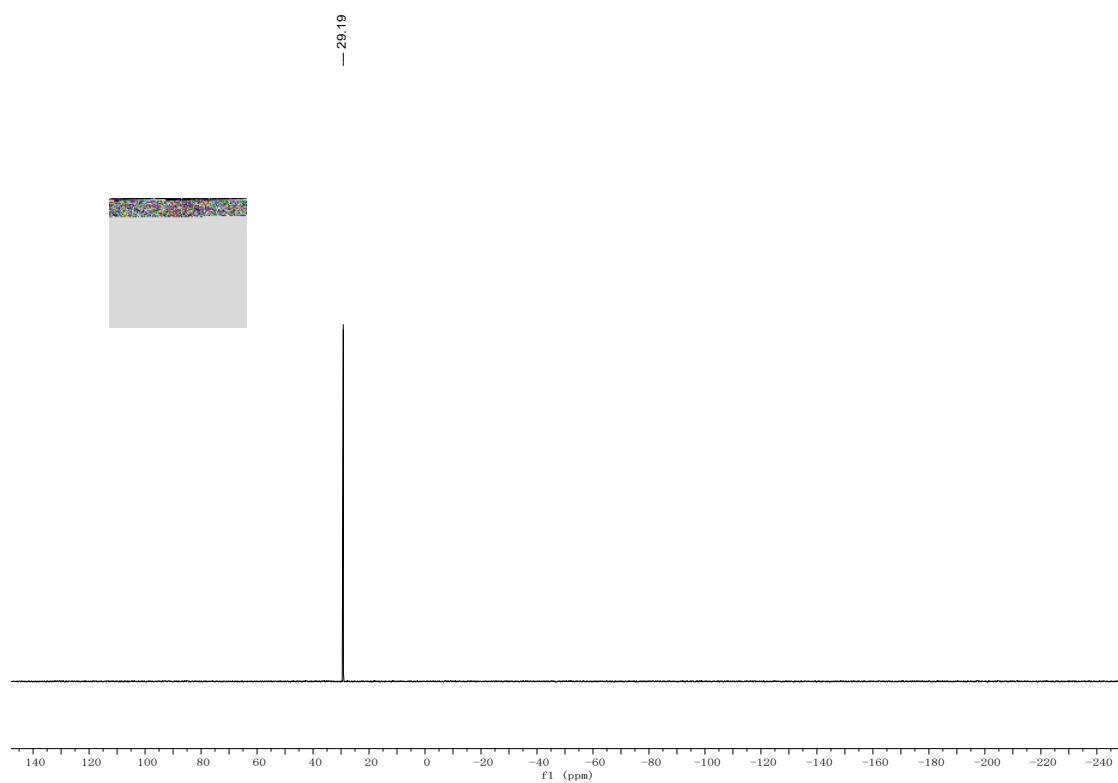

## 9. HPLC Charts

3a: IA, Hexane/*i*PrOH = 85/15, rate = 0.8 mL/min, 254 nm

### <Chromatogram>

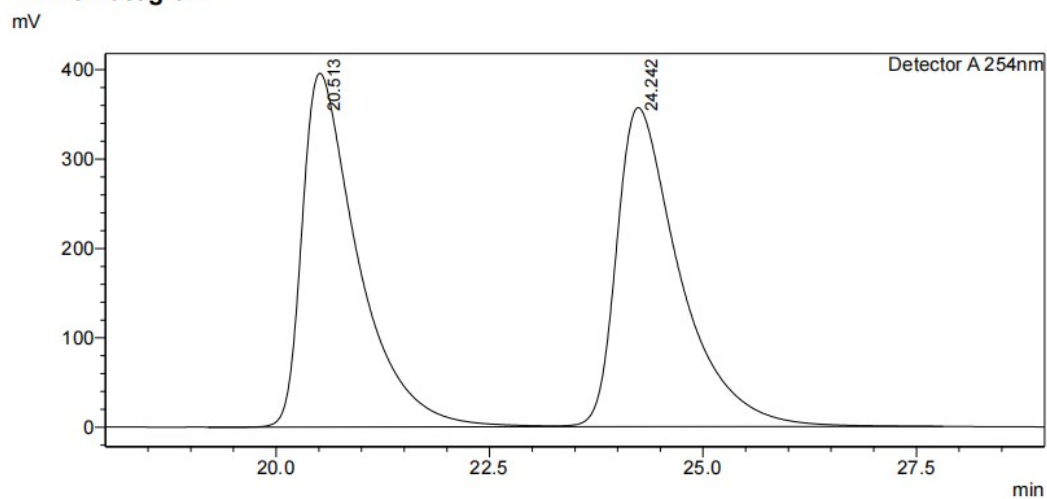

### <Peak Table>

Detector A 254nm

| Peak# | Ret. Time | Area     | Height | Conc.  | Unit | Mark | Name |
|-------|-----------|----------|--------|--------|------|------|------|
| 1     | 20.513    | 18021833 | 395566 | 49.461 |      | M    |      |
| 2     | 24.242    | 18414680 | 356883 | 50.539 |      | V M  |      |
| Total |           | 36436513 | 752449 |        |      |      |      |

### <Chromatogram>

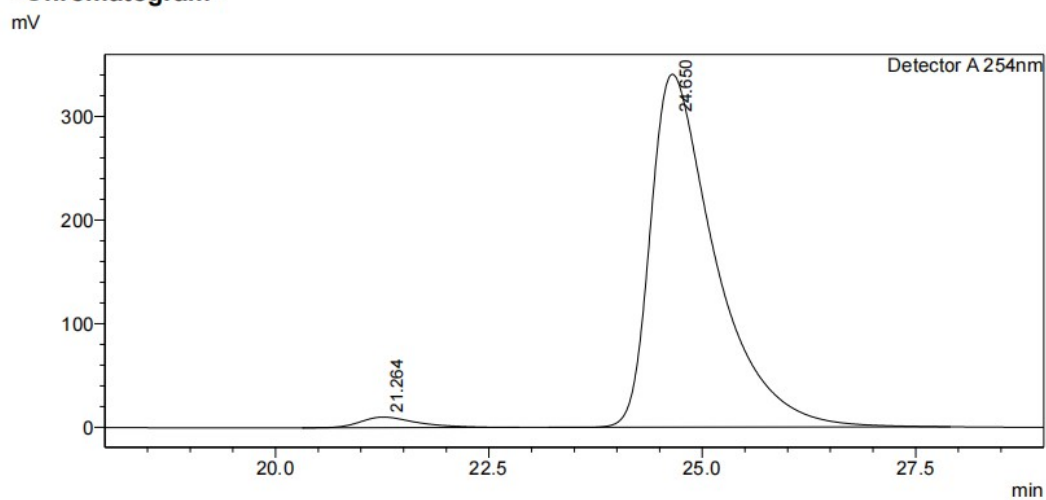

### <Peak Table>

Detector A 254nm

| Peak# | Ret. Time | Area     | Height | Conc.  | Unit | Mark | Name |
|-------|-----------|----------|--------|--------|------|------|------|
| 1     | 21.264    | 464334   | 10145  | 2.515  |      | M    |      |
| 2     | 24.650    | 17997694 | 340532 | 97.485 |      | M    |      |
| Total |           | 18462029 | 350677 |        |      |      |      |



3b: IA, Hexane/*i*PrOH = 70/30, rate = 1.0 mL/min, 254 nm

<Chromatogram>

mAU

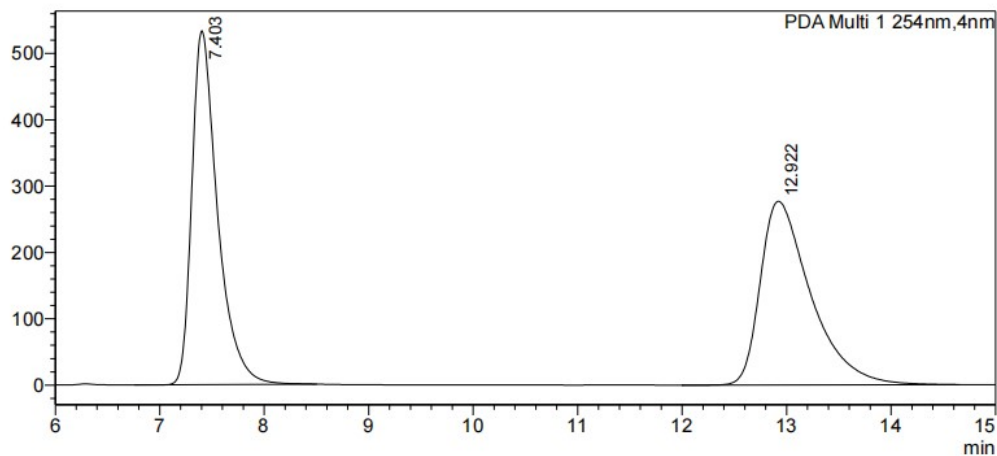

<Peak Table>

PDA Ch1 254nm

| Peak# | Ret. Time | Area     | Height | Area%   | Conc. | Name |
|-------|-----------|----------|--------|---------|-------|------|
| 1     | 7.403     | 9126306  | 533248 | 49.570  | 0.000 |      |
| 2     | 12.922    | 9284578  | 276810 | 50.430  | 0.000 |      |
| Total |           | 18410884 | 810057 | 100.000 |       |      |

<Chromatogram>

mAU

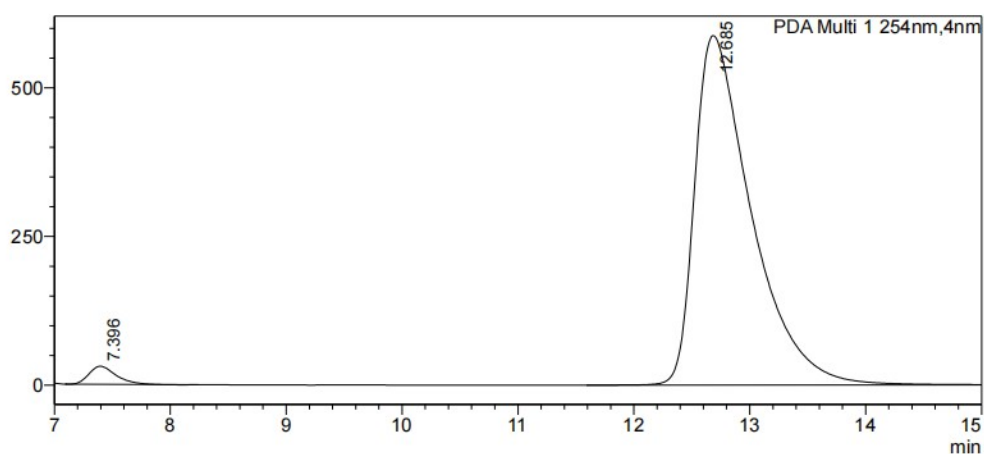

<Peak Table>

PDA Ch1 254nm

| Peak# | Ret. Time | Area     | Height | Area%   | Conc. | Name |
|-------|-----------|----------|--------|---------|-------|------|
| 1     | 7.396     | 493359   | 30391  | 2.406   | 0.000 |      |
| 2     | 12.685    | 20013708 | 587648 | 97.594  | 0.000 |      |
| Total |           | 20507066 | 618039 | 100.000 |       |      |

3c: IA, Hexane/*i*PrOH = 70/30, rate = 1.0 mL/min, 254 nm

<Chromatogram>

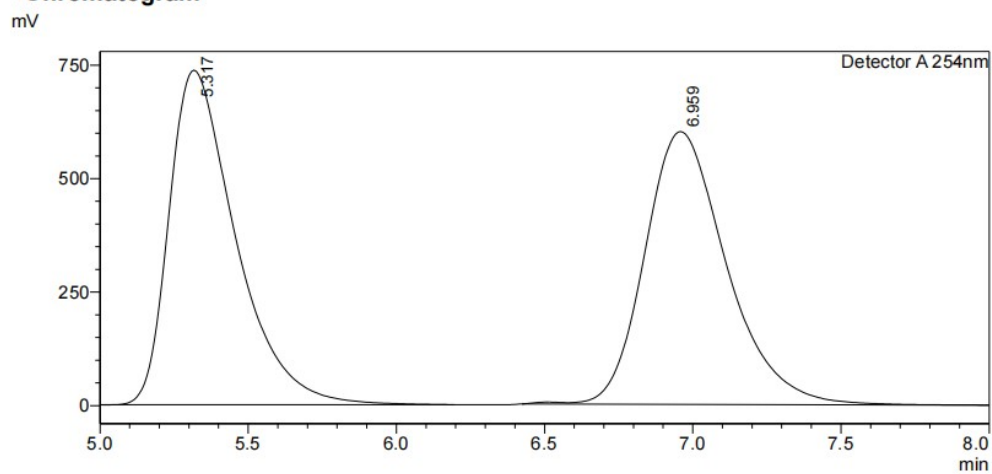

<Peak Table>

Detector A 254nm

| Peak# | Ret. Time | Area     | Height  | Conc.  | Unit | Mark | Name |
|-------|-----------|----------|---------|--------|------|------|------|
| 1     | 5.317     | 11512603 | 736915  | 49.950 |      | M    |      |
| 2     | 6.959     | 11535828 | 601005  | 50.050 |      | M    |      |
| Total |           | 23048431 | 1337920 |        |      |      |      |

<Chromatogram>

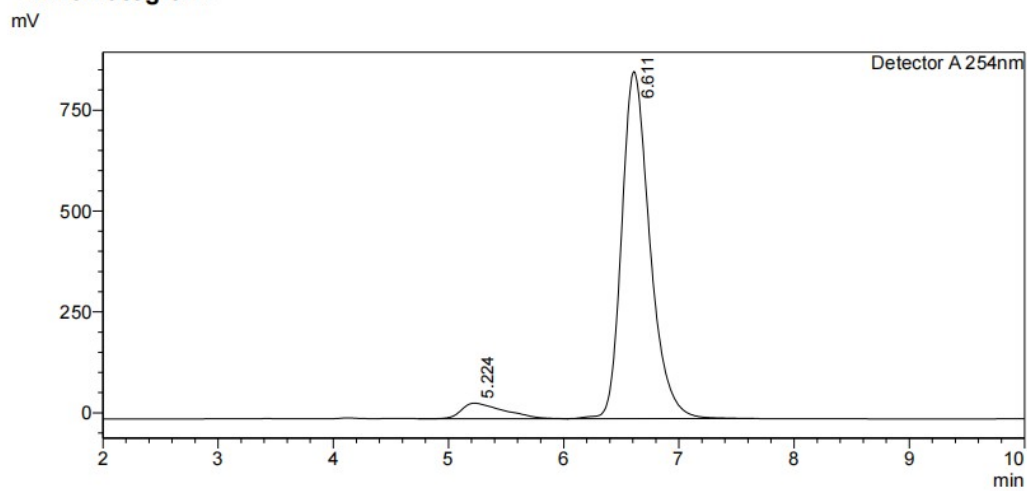

<Peak Table>

Detector A 254nm

| Peak# | Ret. Time | Area     | Height | Conc.  | Unit | Mark | Name |
|-------|-----------|----------|--------|--------|------|------|------|
| 1     | 5.224     | 968158   | 38371  | 6.209  |      | M    |      |
| 2     | 6.611     | 14623791 | 859792 | 93.791 |      | M    |      |
| Total |           | 15591950 | 898163 |        |      |      |      |

3d: IA, Hexane/iPrOH = 70/30, rate = 0.7 mL/min, 254 nm

<Chromatogram>

mV

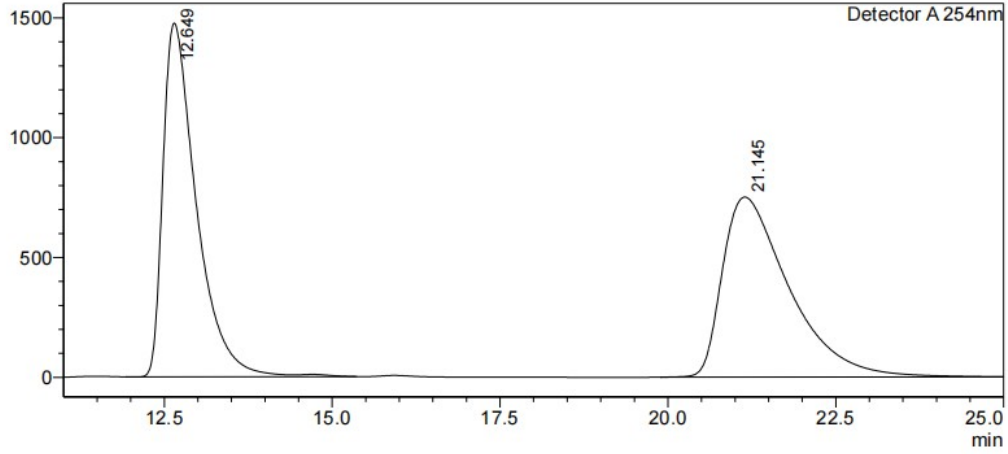

<Peak Table>

Detector A 254nm

| Peak# | Ret. Time | Area      | Height  | Conc.  | Unit | Mark | Name |
|-------|-----------|-----------|---------|--------|------|------|------|
| 1     | 12.649    | 51203290  | 1475885 | 49.622 |      | M    |      |
| 2     | 21.145    | 51983418  | 751423  | 50.378 |      | M    |      |
| Total |           | 103186708 | 2227308 |        |      |      |      |

<Chromatogram>

mV

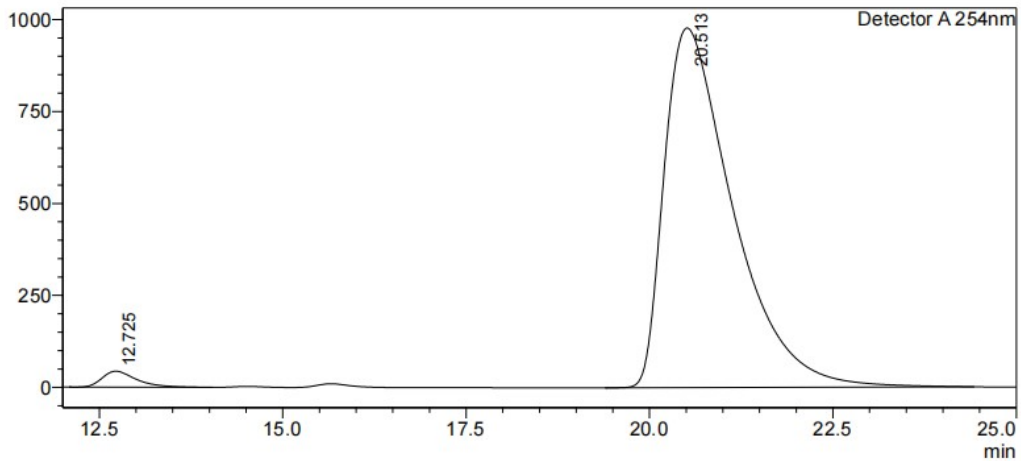

<Peak Table>

Detector A 254nm

| Peak# | Ret. Time | Area     | Height  | Conc.  | Unit | Mark | Name |
|-------|-----------|----------|---------|--------|------|------|------|
| 1     | 12.725    | 1417665  | 43510   | 2.178  |      | M    |      |
| 2     | 20.513    | 63671468 | 977221  | 97.822 |      | M    |      |
| Total |           | 65089133 | 1020732 |        |      |      |      |

3e: IA, Hexane/*i*PrOH = 70/30, rate = 1.0 mL/min, 254 nm

<Chromatogram>

mV

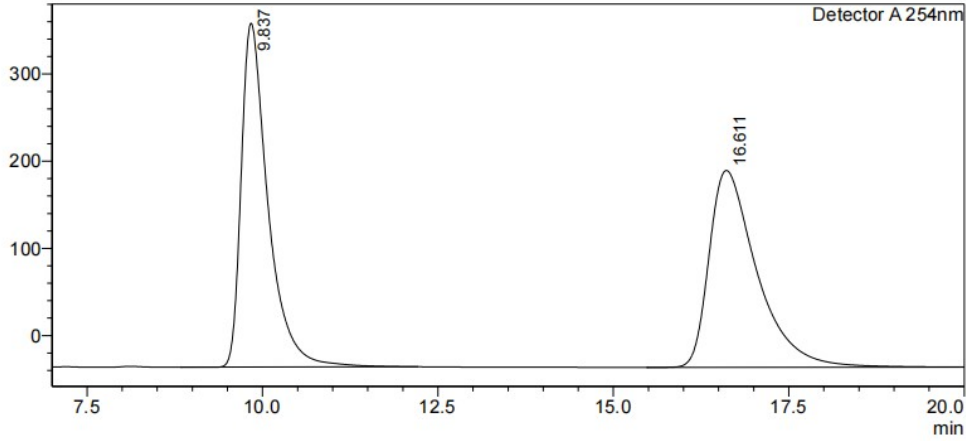

<Peak Table>

Detector A 254nm

| Peak# | Ret. Time | Area     | Height | Conc.  | Unit | Mark | Name |
|-------|-----------|----------|--------|--------|------|------|------|
| 1     | 9.837     | 10495154 | 394293 | 49.424 |      | M    |      |
| 2     | 16.611    | 10739729 | 225816 | 50.576 |      | M    |      |
| Total |           | 21234883 | 620109 |        |      |      |      |

<Chromatogram>

mAU

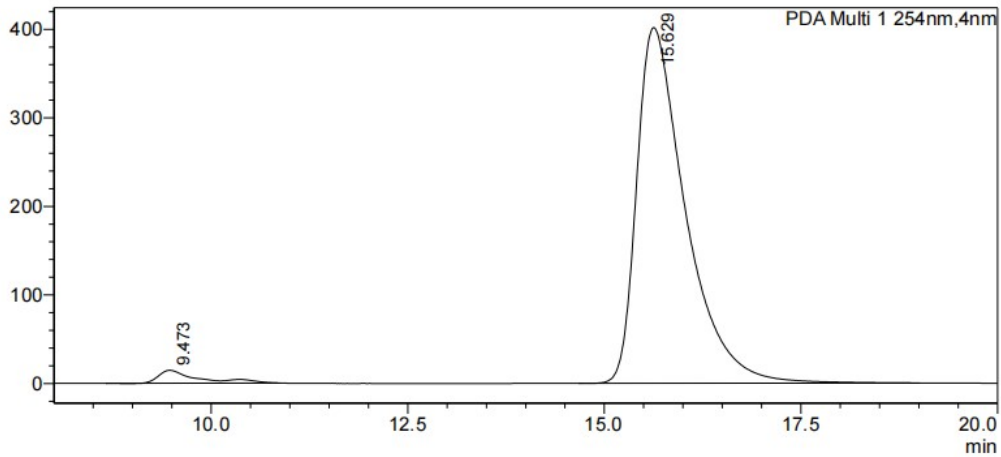

<Peak Table>

PDA Ch1 254nm

| Peak# | Ret. Time | Area     | Height | Area%   | Conc. | Name |
|-------|-----------|----------|--------|---------|-------|------|
| 1     | 9.473     | 512813   | 14607  | 2.872   | 0.000 |      |
| 2     | 15.629    | 17342430 | 401666 | 97.128  | 0.000 |      |
| Total |           | 17855243 | 416274 | 100.000 |       |      |

3f: IA Hexane/*i*PrOH = 85/15, rate = 0.8 mL/min, 254 nm

<Chromatogram>

mV

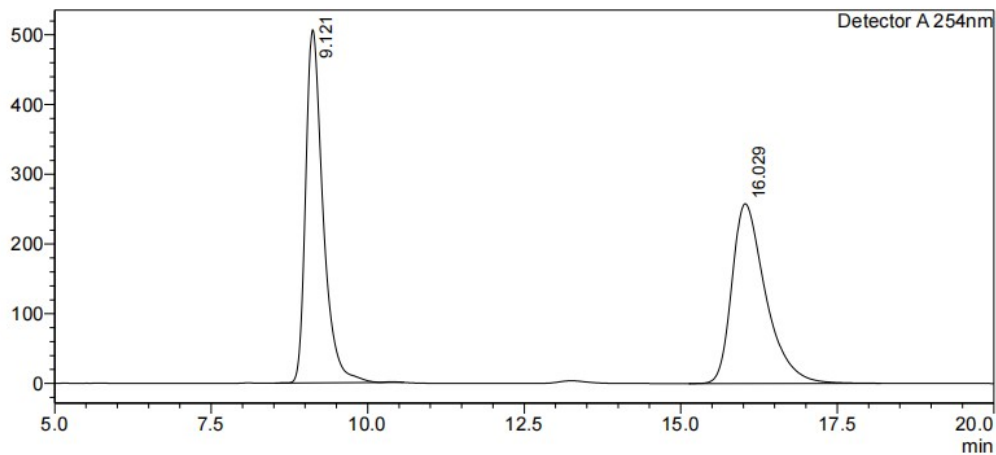

<Peak Table>

Detector A 254nm

| Peak# | Ret. Time | Area     | Height | Conc.  | Unit | Mark | Name |
|-------|-----------|----------|--------|--------|------|------|------|
| 1     | 9.121     | 9742366  | 506350 | 50.209 |      | M    |      |
| 2     | 16.029    | 9661135  | 257617 | 49.791 |      | M    |      |
| Total |           | 19403501 | 763967 |        |      |      |      |

<Chromatogram>

mV

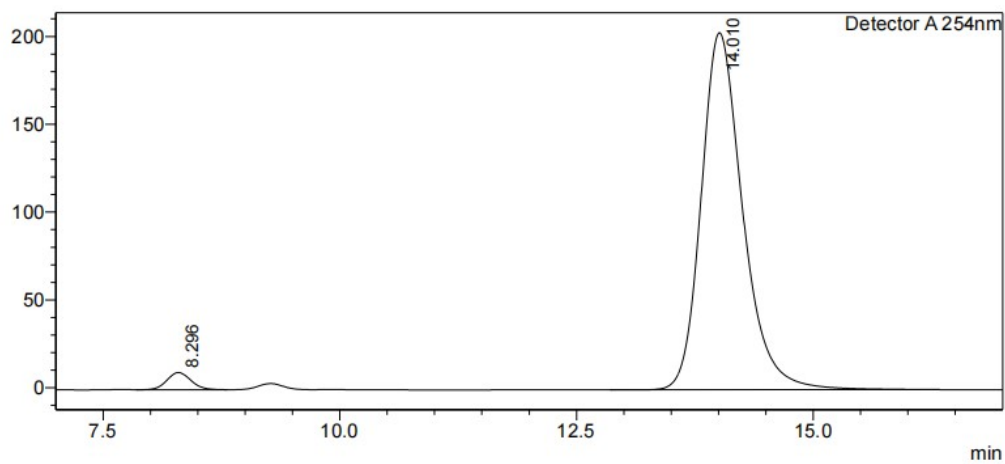

<Peak Table>

Detector A 254nm

| Peak# | Ret. Time | Area    | Height | Conc.  | Unit | Mark | Name |
|-------|-----------|---------|--------|--------|------|------|------|
| 1     | 8.296     | 171291  | 9745   | 2.689  |      | M    |      |
| 2     | 14.010    | 6199018 | 203297 | 97.311 |      | M    |      |
| Total |           | 6370309 | 213042 |        |      |      |      |

3g: IA, Hexane/*i*PrOH = 85/15, rate = 0.8 mL/min, 254 nm

<Chromatogram>

mV

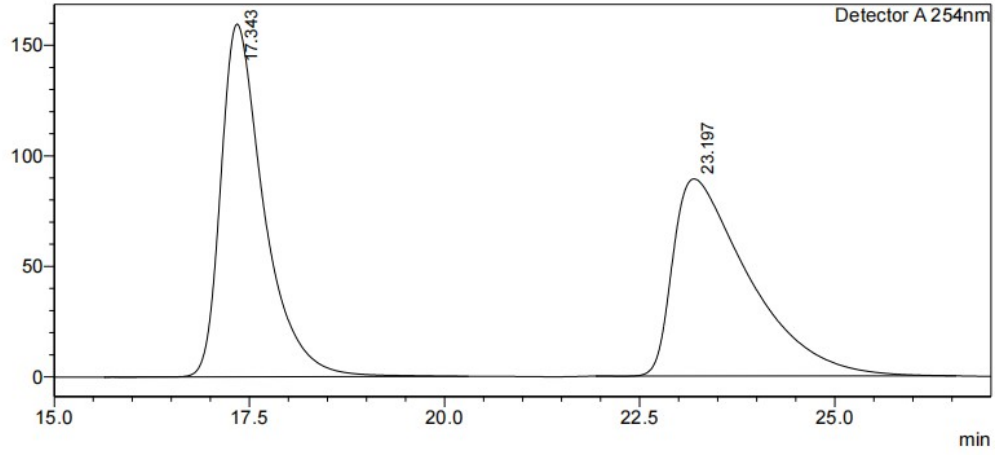

<Peak Table>

Detector A 254nm

| Peak# | Ret. Time | Area     | Height | Conc.  | Unit | Mark | Name |
|-------|-----------|----------|--------|--------|------|------|------|
| 1     | 17.343    | 6125675  | 159542 | 50.225 |      | M    |      |
| 2     | 23.197    | 6070684  | 89202  | 49.775 |      | M    |      |
| Total |           | 12196359 | 248744 |        |      |      |      |

<Chromatogram>

mV

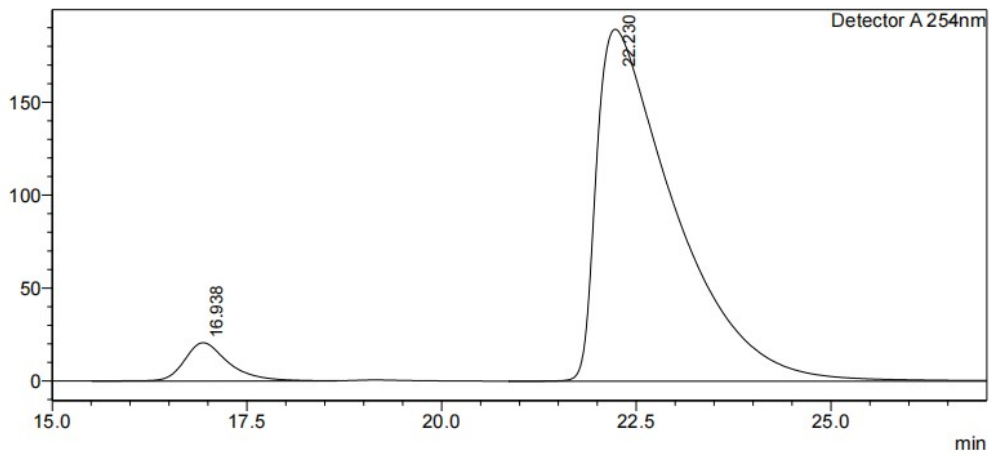

<Peak Table>

Detector A 254nm

| Peak# | Ret. Time | Area     | Height | Conc.  | Unit | Mark | Name |
|-------|-----------|----------|--------|--------|------|------|------|
| 1     | 16.938    | 821603   | 20638  | 5.834  |      | M    |      |
| 2     | 22.230    | 13260520 | 189223 | 94.166 |      | M    |      |
| Total |           | 14082123 | 209862 |        |      |      |      |

3h: IA, Hexane/iPrOH = 70/30, rate = 0.7 mL/min, 254 nm

<Chromatogram>

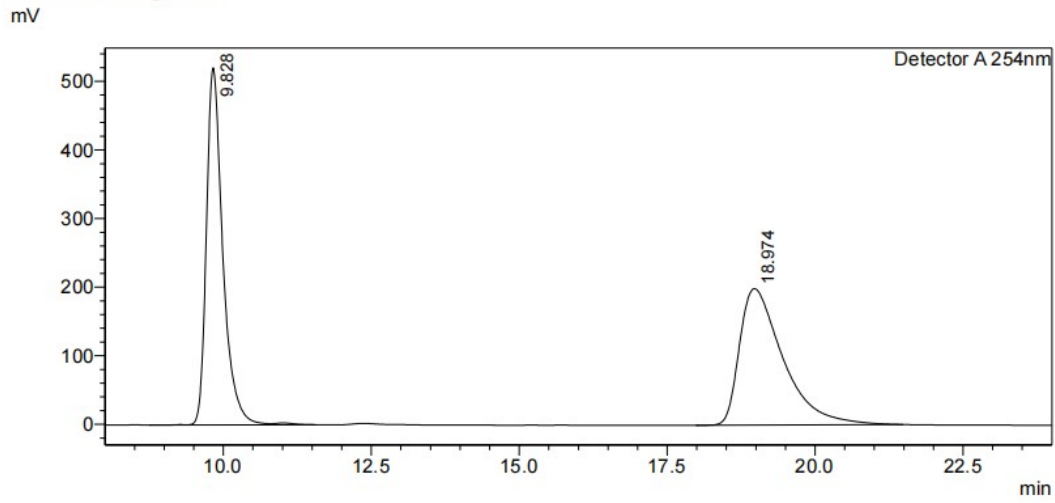

<Peak Table>

Detector A 254nm

| Peak# | Ret. Time | Area     | Height | Conc.  | Unit | Mark | Name |
|-------|-----------|----------|--------|--------|------|------|------|
| 1     | 9.828     | 10056950 | 520217 | 49.716 |      | M    |      |
| 2     | 18.974    | 10171664 | 198909 | 50.284 |      | M    |      |
| Total |           | 20228614 | 719126 |        |      |      |      |

<Chromatogram>

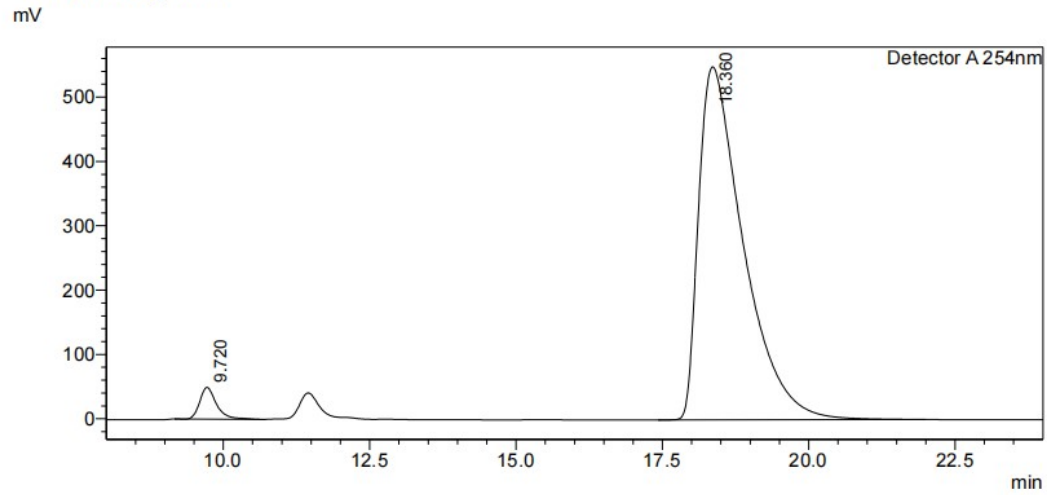

<Peak Table>

Detector A 254nm

| Peak# | Ret. Time | Area     | Height | Conc.  | Unit | Mark | Name |
|-------|-----------|----------|--------|--------|------|------|------|
| 1     | 9.720     | 973349   | 49161  | 3.233  |      | M    |      |
| 2     | 18.360    | 29129745 | 548585 | 96.767 |      | M    |      |
| Total |           | 30103093 | 597746 |        |      |      |      |

3i: IA, Hexane/*i*PrOH = 70/30, rate = 1.0 mL/min, 254 nm

<Chromatogram>

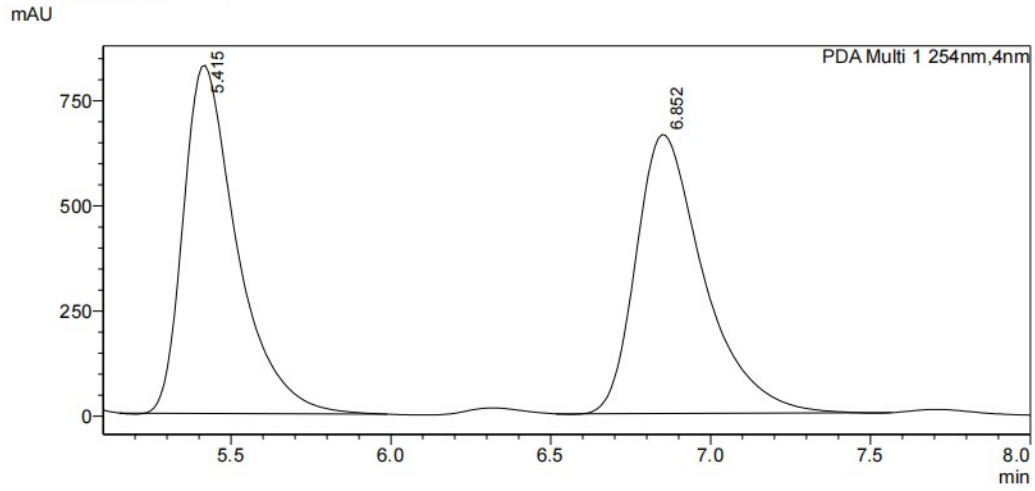

<Peak Table>

PDA Ch1 254nm

| Peak# | Ret. Time | Area     | Height  | Area%   | Conc. | Name |
|-------|-----------|----------|---------|---------|-------|------|
| 1     | 5.415     | 9675076  | 827030  | 49.723  | 0.000 |      |
| 2     | 6.852     | 9782936  | 662962  | 50.277  | 0.000 |      |
| Total |           | 19458012 | 1489992 | 100.000 |       |      |

<Chromatogram>

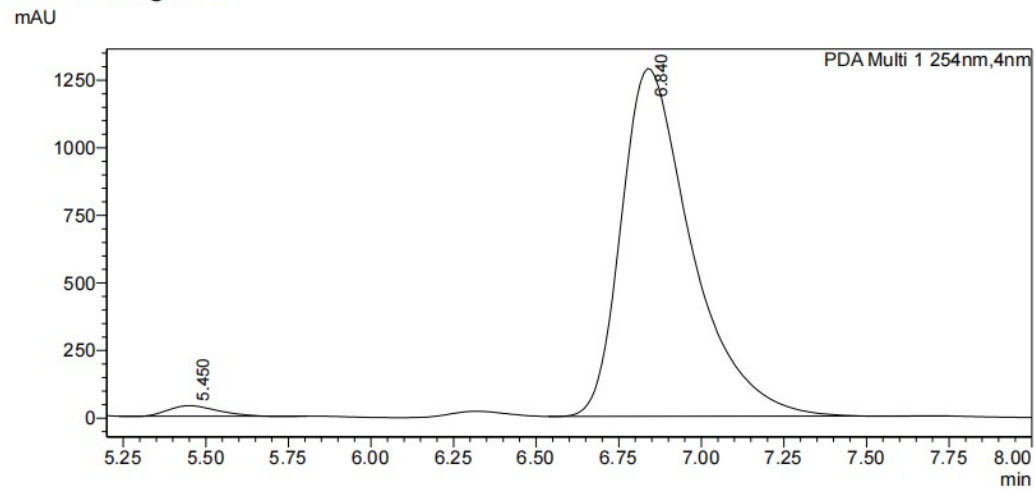

<Peak Table>

PDA Ch1 254nm

| Peak# | Ret. Time | Area     | Height  | Area%   | Conc. | Name |
|-------|-----------|----------|---------|---------|-------|------|
| 1     | 5.450     | 397216   | 39141   | 2.038   | 0.000 |      |
| 2     | 6.840     | 19095539 | 1286700 | 97.962  | 0.000 |      |
| Total |           | 19492755 | 1325841 | 100.000 |       |      |



3j: IA, Hexane/*i*PrOH = 90/10, rate = 0.8 mL/min, 254 nm

<Chromatogram>

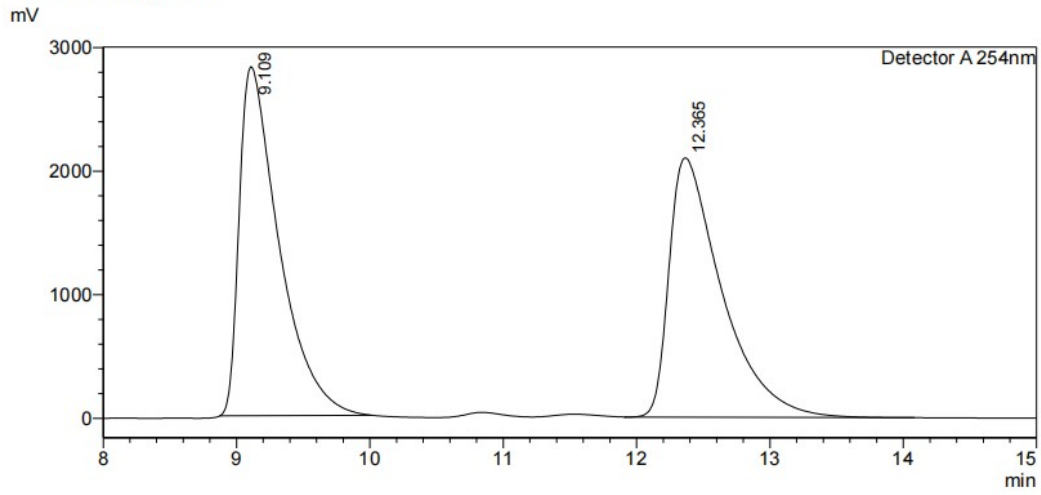

<Peak Table>

Detector A 254nm

| Peak# | Ret. Time | Area      | Height  | Conc.  | Unit | Mark | Name |
|-------|-----------|-----------|---------|--------|------|------|------|
| 1     | 9.109     | 58421480  | 2823036 | 50.328 |      | M    |      |
| 2     | 12.365    | 57660971  | 2097505 | 49.672 |      | M    |      |
| Total |           | 116082451 | 4920541 |        |      |      |      |

<Chromatogram>

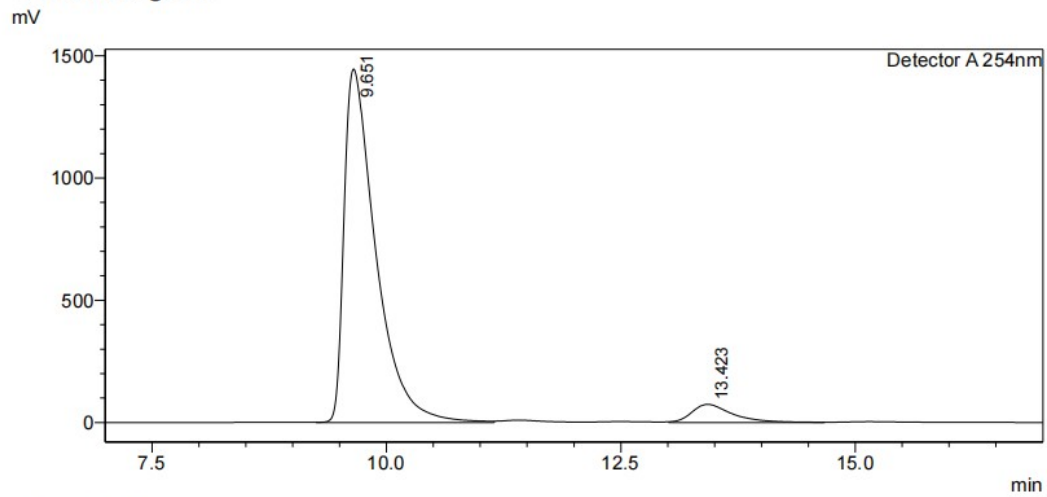

<Peak Table>

Detector A 254nm

| Peak# | Ret. Time | Area     | Height  | Conc.  | Unit | Mark | Name |
|-------|-----------|----------|---------|--------|------|------|------|
| 1     | 9.651     | 34078525 | 1445881 | 93.784 |      | M    |      |
| 2     | 13.423    | 2258634  | 74233   | 6.216  |      | M    |      |
| Total |           | 36337159 | 1520114 |        |      |      |      |

3k: OD-H, Hexane/*i*PrOH = 90/10, rate = 0.8 mL/min, 254 nm

<Chromatogram>

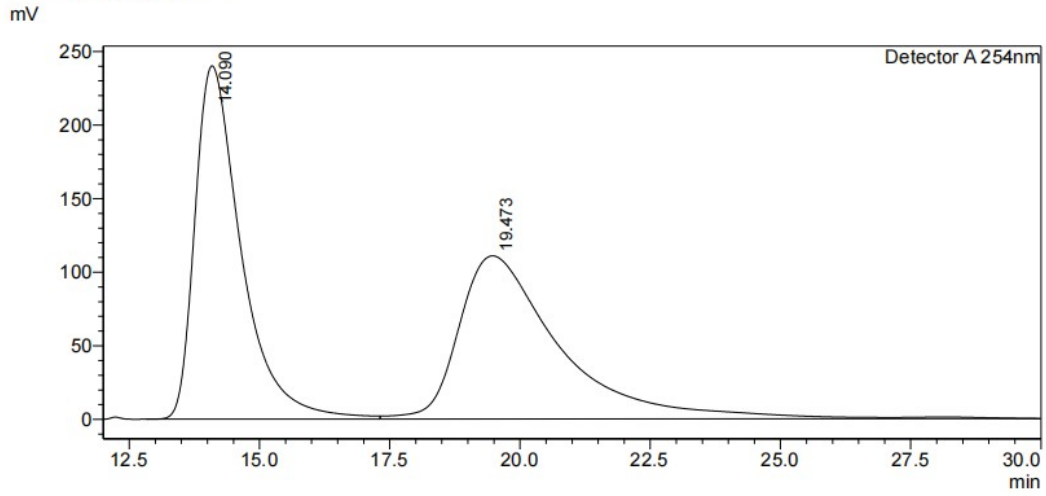

<Peak Table>

| Peak# | Ret. Time | Area     | Height | Conc.  | Unit | Mark | Name |
|-------|-----------|----------|--------|--------|------|------|------|
| 1     | 14.090    | 14837898 | 240021 | 49.688 |      | M    |      |
| 2     | 19.473    | 15024146 | 110793 | 50.312 |      | V M  |      |
| Total |           | 29862044 | 350814 |        |      |      |      |

<Chromatogram>

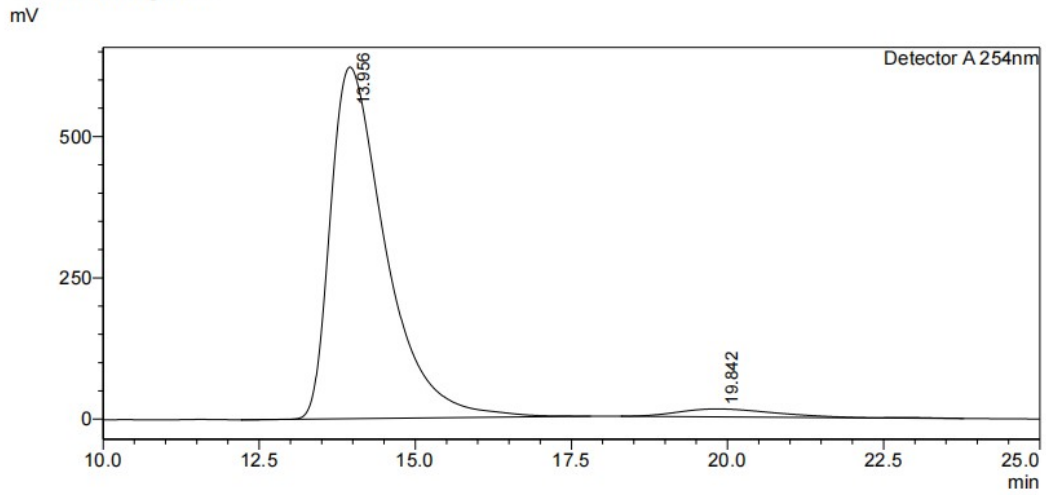

<Peak Table>

| Peak# | Ret. Time | Area     | Height | Conc.  | Unit | Mark | Name |
|-------|-----------|----------|--------|--------|------|------|------|
| 1     | 13.956    | 38145321 | 621816 | 96.086 |      | M    |      |
| 2     | 19.842    | 1553773  | 14039  | 3.914  |      | M    |      |
| Total |           | 39699094 | 635855 |        |      |      |      |

3I: AD-H, Hexane/iPrOH = 70/30, rate = 1.0 mL/min, 254 nm

<Chromatogram>

mV

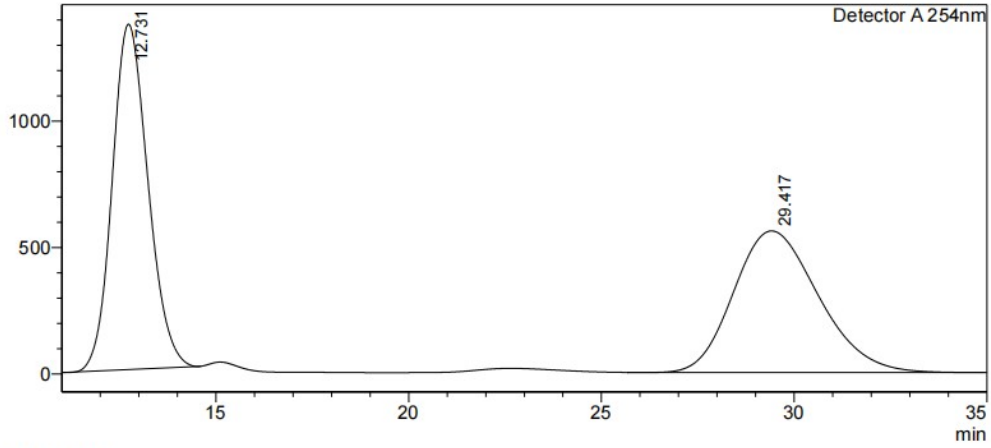

<Peak Table>

Detector A 254nm

| Peak# | Ret. Time | Area      | Height  | Conc.  | Unit | Mark | Name |
|-------|-----------|-----------|---------|--------|------|------|------|
| 1     | 12.731    | 88170548  | 1366225 | 50.660 |      | M    |      |
| 2     | 29.417    | 85873866  | 559913  | 49.340 |      | M    |      |
| Total |           | 174044414 | 1926138 |        |      |      |      |

<Chromatogram>

mV

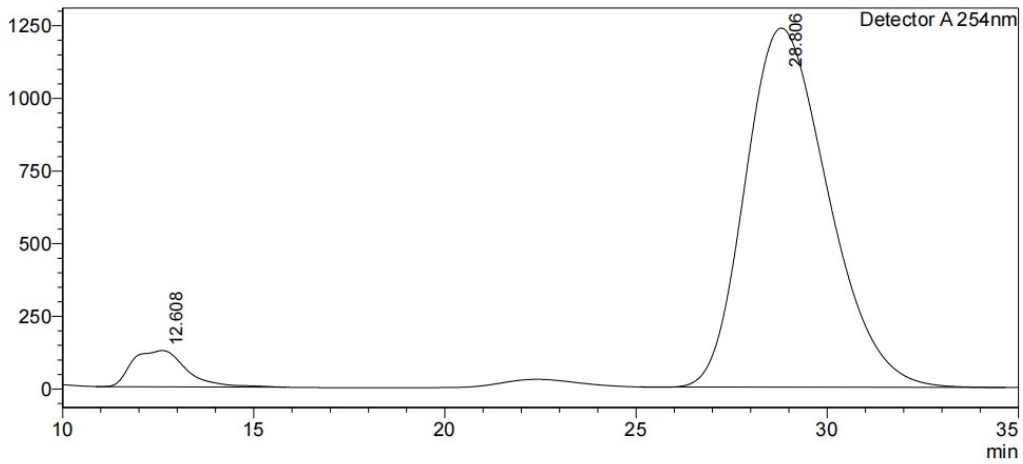

<Peak Table>

Detector A 254nm

| Peak# | Ret. Time | Area      | Height  | Conc.  | Unit | Mark | Name |
|-------|-----------|-----------|---------|--------|------|------|------|
| 1     | 12.608    | 12228725  | 124709  | 6.162  |      | M    |      |
| 2     | 28.806    | 186237581 | 1235510 | 93.838 |      | M    |      |
| Total |           | 198466305 | 1360219 |        |      |      |      |

3m: AD-H, Hexane/*i*PrOH = 70/30, rate = 1.0 mL/min, 254 nm

<Chromatogram>

mV

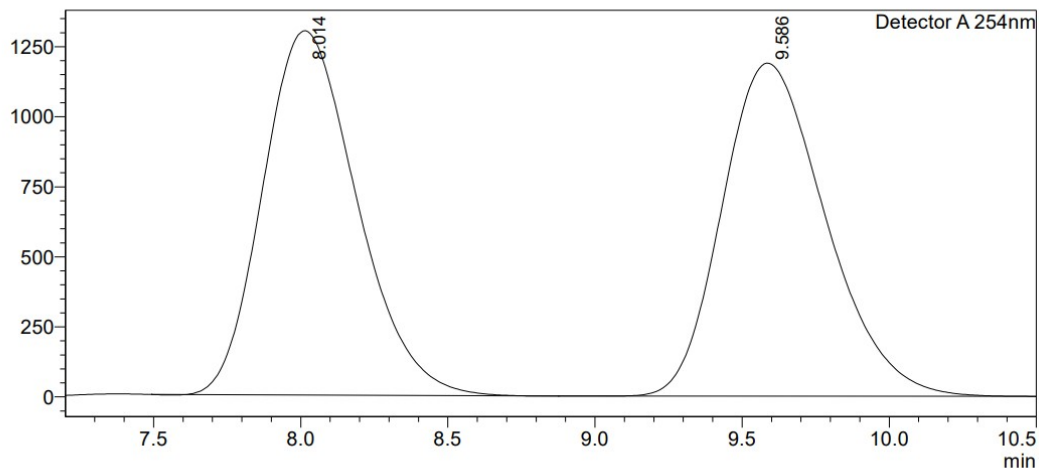

<Peak Table>

Detector A 254nm

| Peak# | Ret. Time | Area     | Height  | Conc.  | Unit | Mark | Name |
|-------|-----------|----------|---------|--------|------|------|------|
| 1     | 8.014     | 28883434 | 1300790 | 49.850 |      | M    |      |
| 2     | 9.586     | 29057279 | 1188804 | 50.150 |      | M    |      |
| Total |           | 57940712 | 2489593 |        |      |      |      |

<Chromatogram>

mV

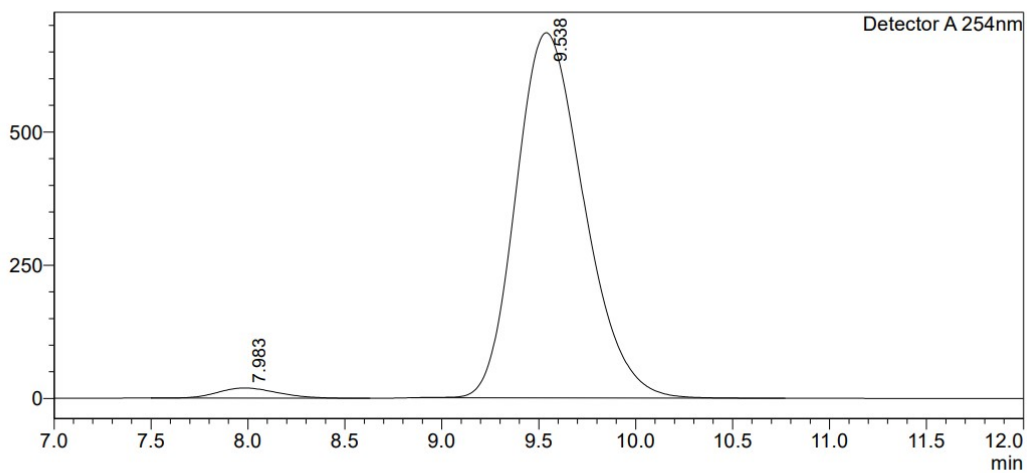

<Peak Table>

Detector A 254nm

| Peak# | Ret. Time | Area     | Height | Conc.  | Unit | Mark | Name |
|-------|-----------|----------|--------|--------|------|------|------|
| 1     | 7.983     | 402683   | 18928  | 2.353  |      | M    |      |
| 2     | 9.538     | 16711307 | 685292 | 97.647 |      | M    |      |
| Total |           | 17113989 | 704220 |        |      |      |      |

3n: IA, Hexane/iPrOH = 90/10, rate = 0.8 mL/min, 254 nm

<Chromatogram>

mV

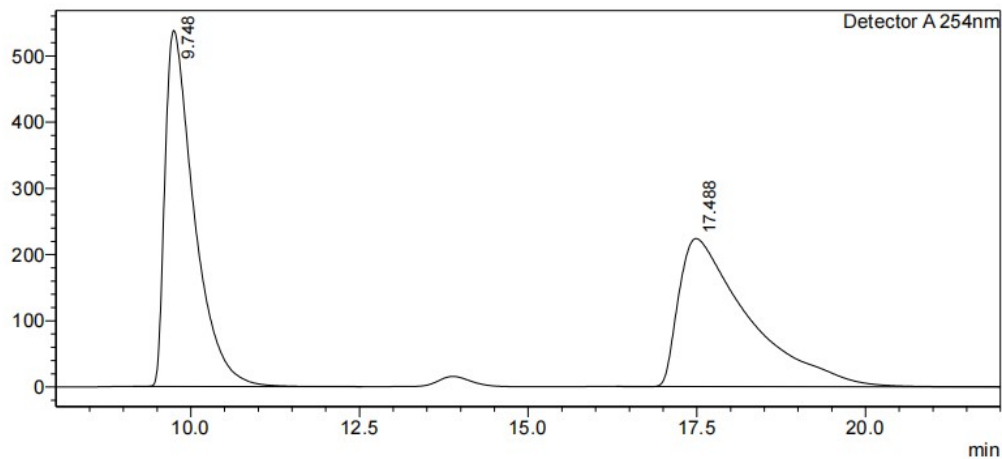

<Peak Table>

Detector A 254nm

| Peak# | Ret. Time | Area     | Height | Conc.  | Unit | Mark | Name |
|-------|-----------|----------|--------|--------|------|------|------|
| 1     | 9.748     | 16174311 | 537669 | 50.198 |      | M    |      |
| 2     | 17.488    | 16046521 | 223459 | 49.802 |      | M    |      |
| Total |           | 32220832 | 761129 |        |      |      |      |

<Chromatogram>

mV

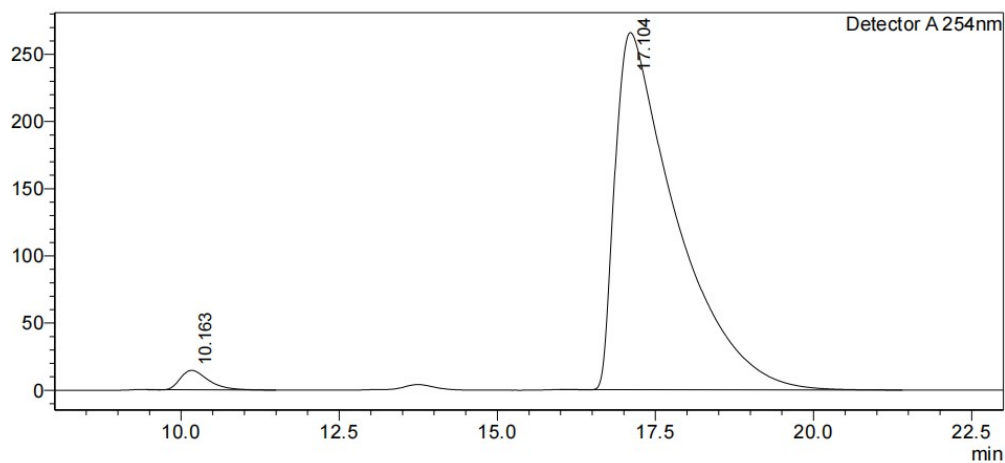

<Peak Table>

Detector A 254nm

| Peak# | Ret. Time | Area     | Height | Conc.  | Unit | Mark | Name |
|-------|-----------|----------|--------|--------|------|------|------|
| 1     | 10.163    | 444737   | 14470  | 2.426  |      | M    |      |
| 2     | 17.104    | 17885238 | 265672 | 97.574 |      | M    |      |
| Total |           | 18329975 | 280142 |        |      |      |      |

30: IA, Hexane/*i*PrOH = 85/15, rate = 0.8 mL/min, 254 nm

<Chromatogram>

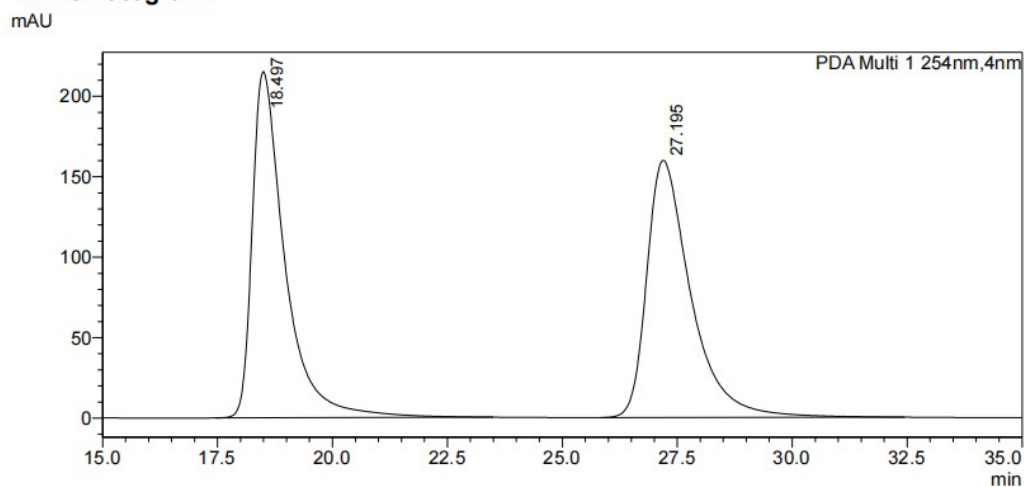

<Peak Table>

| PDA Ch1 254nm |           |          |        |         |       |      |
|---------------|-----------|----------|--------|---------|-------|------|
| Peak#         | Ret. Time | Area     | Height | Area%   | Conc. | Name |
| 1             | 18.497    | 10635582 | 215092 | 49.899  | 0.000 |      |
| 2             | 27.195    | 10678586 | 159753 | 50.101  | 0.000 |      |
| Total         |           | 21314169 | 374845 | 100.000 |       |      |

<Chromatogram>

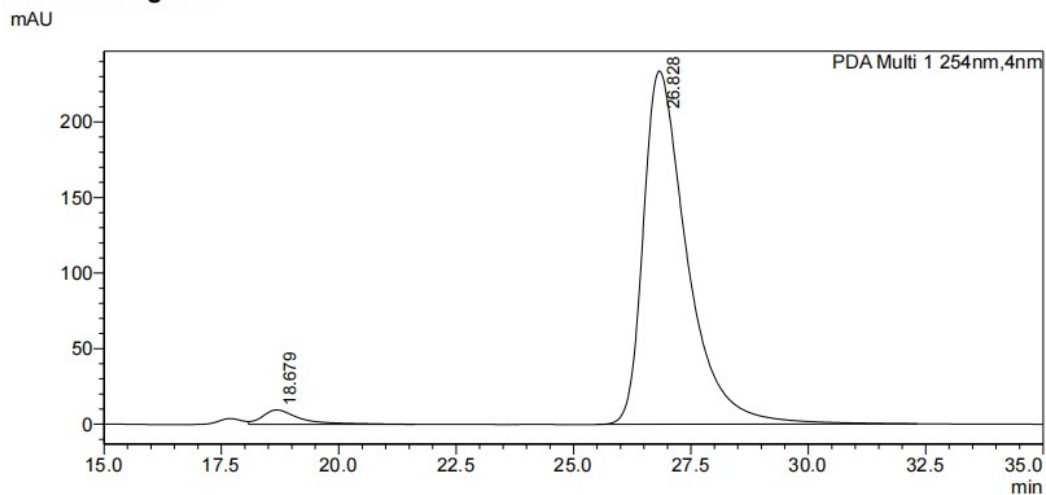

<Peak Table>

| PDA Ch1 254nm |           |          |        |         |       |      |
|---------------|-----------|----------|--------|---------|-------|------|
| Peak#         | Ret. Time | Area     | Height | Area%   | Conc. | Name |
| 1             | 18.679    | 534709   | 9558   | 3.407   | 0.000 |      |
| 2             | 26.828    | 15161589 | 233806 | 96.593  | 0.000 |      |
| Total         |           | 15696298 | 243364 | 100.000 |       |      |

3p: IA, Hexane/iPrOH = 80/20, rate = 1.0 mL/min, 254 nm

<Chromatogram>

mV

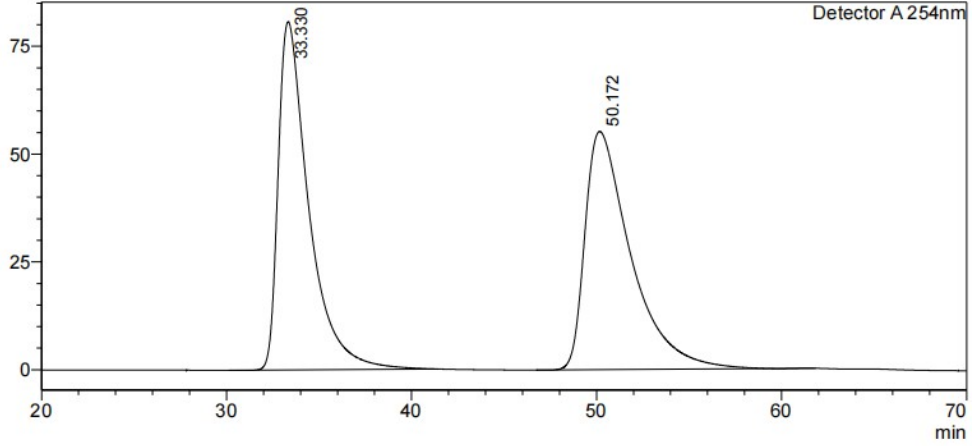

<Peak Table>

Detector A 254nm

| Peak# | Ret. Time | Area     | Height | Conc.  | Unit | Mark | Name |
|-------|-----------|----------|--------|--------|------|------|------|
| 1     | 33.330    | 9271685  | 80746  | 49.335 |      | M    |      |
| 2     | 50.172    | 9521446  | 55251  | 50.665 |      | M    |      |
| Total |           | 18793131 | 135997 |        |      |      |      |

<Chromatogram>

mV

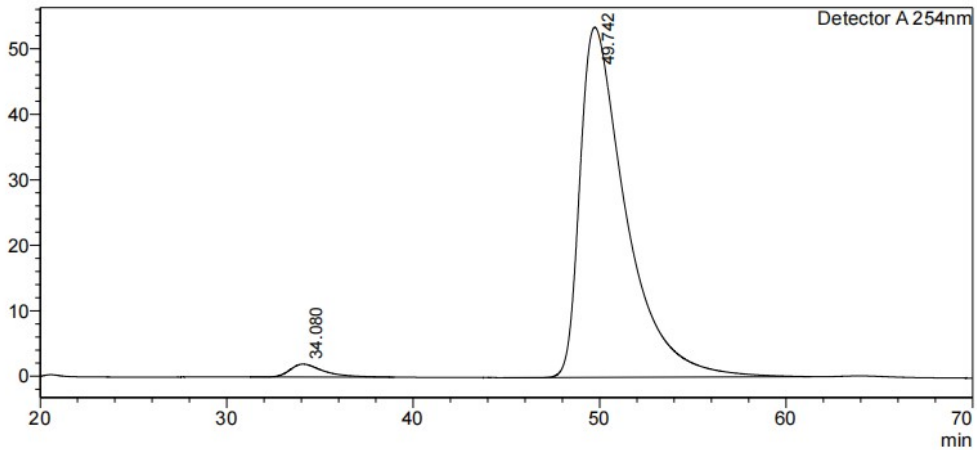

<Peak Table>

Detector A 254nm

| Peak# | Ret. Time | Area    | Height | Conc.  | Unit | Mark | Name |
|-------|-----------|---------|--------|--------|------|------|------|
| 1     | 34.080    | 245072  | 1973   | 2.611  |      | M    |      |
| 2     | 49.742    | 9141682 | 53456  | 97.389 |      | M    |      |
| Total |           | 9386754 | 55429  |        |      |      |      |

3q: IB N-5, Hexane/*i*PrOH = 70/30, rate = 1.0 mL/min, 254 nm

<Chromatogram>

mV

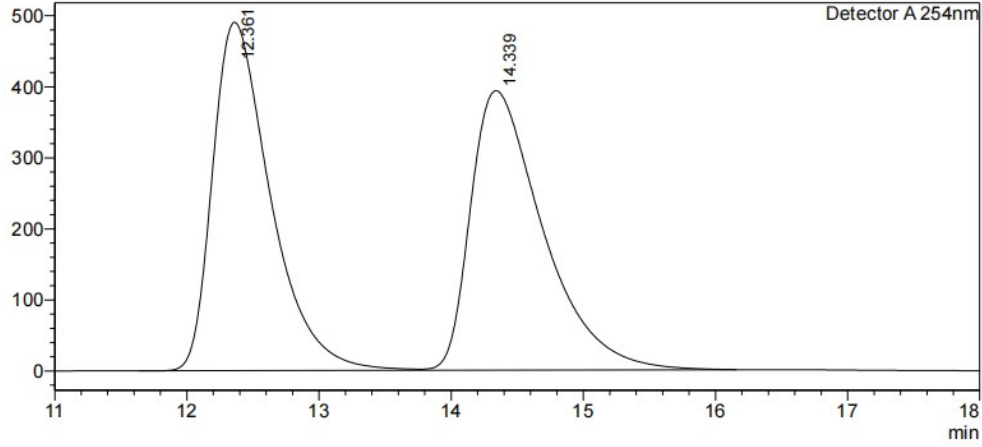

<Peak Table>

Detector A 254nm

| Peak# | Ret. Time | Area     | Height | Conc.  | Unit | Mark | Name |
|-------|-----------|----------|--------|--------|------|------|------|
| 1     | 12.361    | 14937006 | 490299 | 49.908 |      | M    |      |
| 2     | 14.339    | 14992016 | 393370 | 50.092 |      | V M  |      |
| Total |           | 29929023 | 883670 |        |      |      |      |

<Chromatogram>

mV

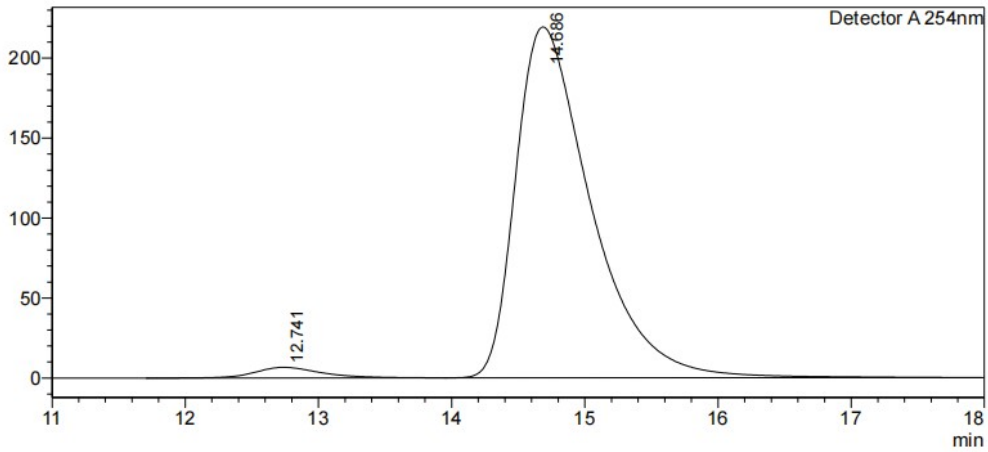

<Peak Table>

Detector A 254nm

| Peak# | Ret. Time | Area    | Height | Conc.  | Unit | Mark | Name |
|-------|-----------|---------|--------|--------|------|------|------|
| 1     | 12.741    | 233180  | 6664   | 2.631  |      | M    |      |
| 2     | 14.686    | 8628251 | 219385 | 97.369 |      | V M  |      |
| Total |           | 8861431 | 226050 |        |      |      |      |



3r: IA, Hexane/*i*PrOH = 90/10, rate = 0.8 mL/min, 254 nm

<Chromatogram>

mV

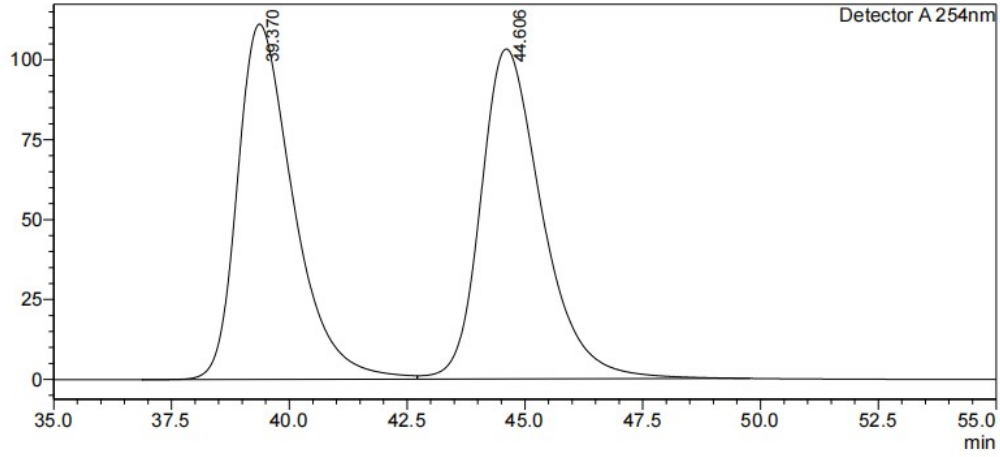

<Peak Table>

Detector A 254nm

| Peak# | Ret. Time | Area     | Height | Conc.  | Unit | Mark | Name |
|-------|-----------|----------|--------|--------|------|------|------|
| 1     | 39.370    | 9164739  | 111125 | 49.489 |      | M    |      |
| 2     | 44.606    | 9354107  | 103213 | 50.511 |      | V M  |      |
| Total |           | 18518847 | 214338 |        |      |      |      |

<Chromatogram>

mV

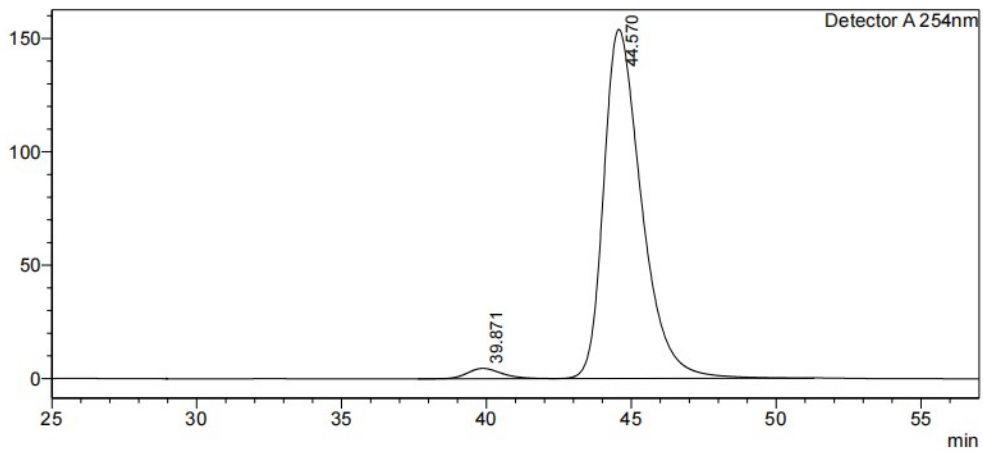

<Peak Table>

Detector A 254nm

| Peak# | Ret. Time | Area     | Height | Conc.  | Unit | Mark | Name |
|-------|-----------|----------|--------|--------|------|------|------|
| 1     | 39.871    | 369866   | 4537   | 2.579  |      | M    |      |
| 2     | 44.570    | 13970836 | 153969 | 97.421 |      | M    |      |
| Total |           | 14340702 | 158506 |        |      |      |      |

3s: OD-H, Hexane/*i*PrOH = 94/6, rate = 0.6 mL/min, 254 nm

<Chromatogram>

mAU

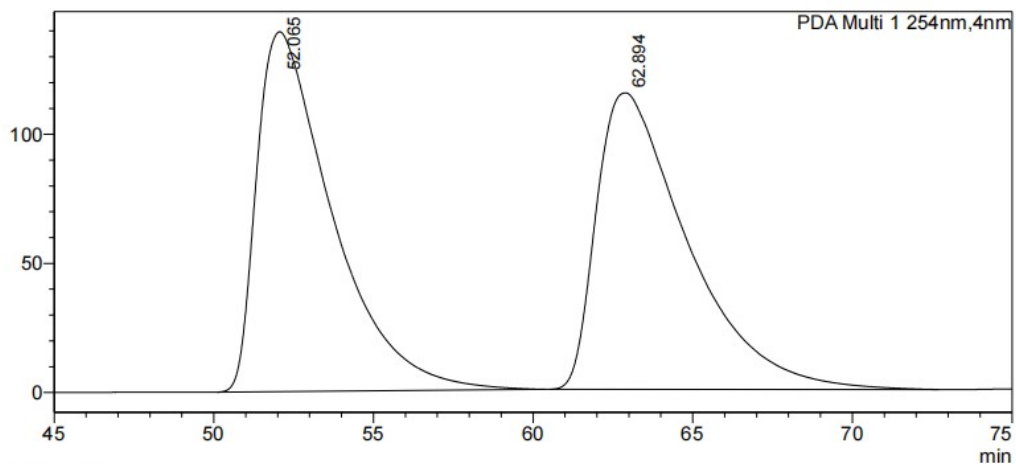

<Peak Table>

PDA Ch1 254nm

| Peak# | Ret. Time | Area     | Height | Area%   | Conc. | Name |
|-------|-----------|----------|--------|---------|-------|------|
| 1     | 52.065    | 22932298 | 139350 | 50.061  | 0.000 |      |
| 2     | 62.894    | 22876220 | 114817 | 49.939  | 0.000 |      |
| Total |           | 45808518 | 254167 | 100.000 |       |      |

<Chromatogram>

mAU

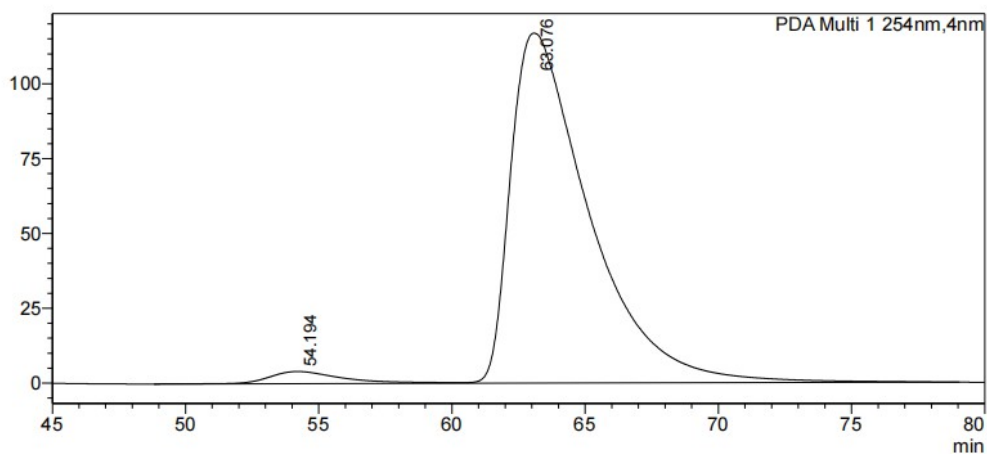

<Peak Table>

PDA Ch1 254nm

| Peak# | Ret. Time | Area     | Height | Area%   | Conc. | Name |
|-------|-----------|----------|--------|---------|-------|------|
| 1     | 54.194    | 755574   | 4078   | 3.039   | 0.000 |      |
| 2     | 63.076    | 24104505 | 116901 | 96.961  | 0.000 |      |
| Total |           | 24860078 | 120979 | 100.000 |       |      |

3t: AS-H, Hexane/*i*PrOH = 95/5, rate = 0.6 mL/min, 254 nm

<Chromatogram>

mV

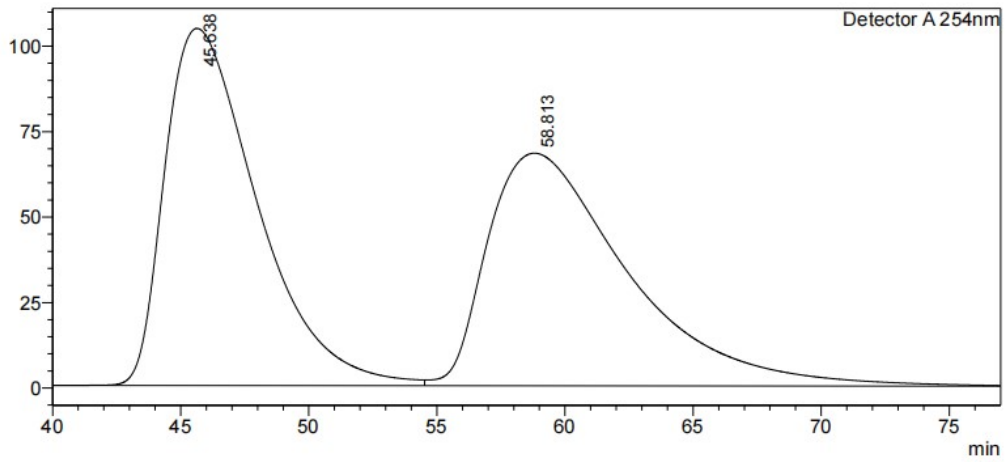

<Peak Table>

Detector A 254nm

| Peak# | Ret. Time | Area     | Height | Conc.  | Unit | Mark | Name |
|-------|-----------|----------|--------|--------|------|------|------|
| 1     | 45.638    | 26246300 | 104497 | 50.229 |      | M    |      |
| 2     | 58.813    | 26006572 | 68067  | 49.771 |      | V M  |      |
| Total |           | 52252872 | 172564 |        |      |      |      |

<Chromatogram>

mV

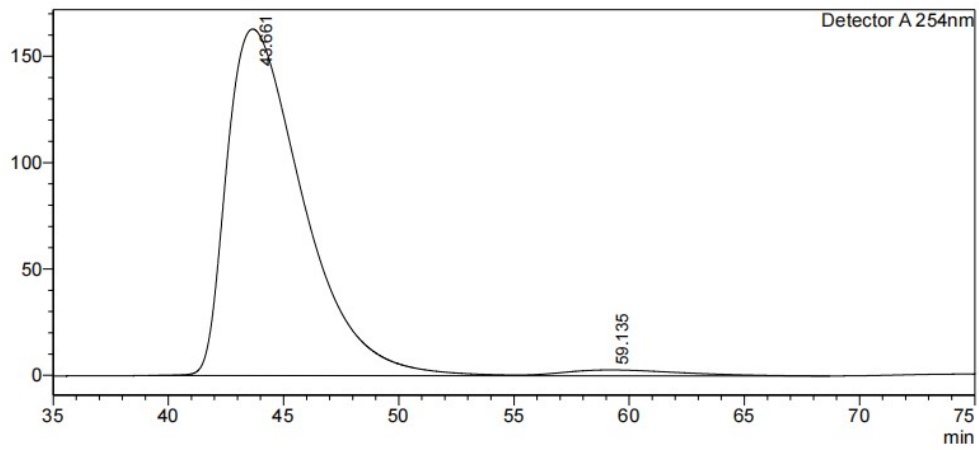

<Peak Table>

Detector A 254nm

| Peak# | Ret. Time | Area     | Height | Conc.  | Unit | Mark | Name |
|-------|-----------|----------|--------|--------|------|------|------|
| 1     | 43.661    | 37451303 | 162892 | 97.467 |      | M    |      |
| 2     | 59.135    | 973190   | 2753   | 2.533  |      | V M  |      |
| Total |           | 38424493 | 165645 |        |      |      |      |

3u: IA, Hexane/iPrOH = 70/30, rate = 1.0 mL/min, 254 nm

<Chromatogram>

mV

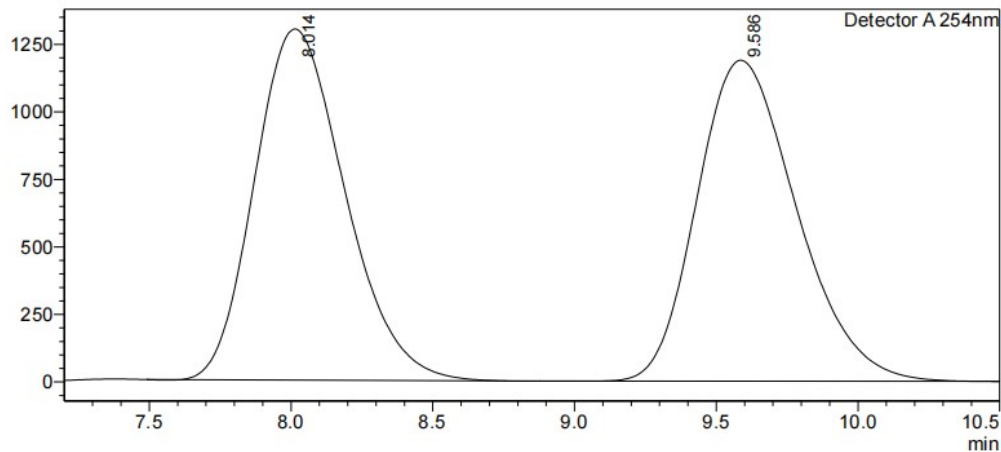

<Peak Table>

Detector A 254nm

| Peak# | Ret. Time | Area     | Height  | Conc.  | Unit | Mark | Name |
|-------|-----------|----------|---------|--------|------|------|------|
| 1     | 8.014     | 28883434 | 1300790 | 49.850 |      | M    |      |
| 2     | 9.586     | 29057279 | 1188804 | 50.150 |      | M    |      |
| Total |           | 57940712 | 2489593 |        |      |      |      |

<Chromatogram>

mV

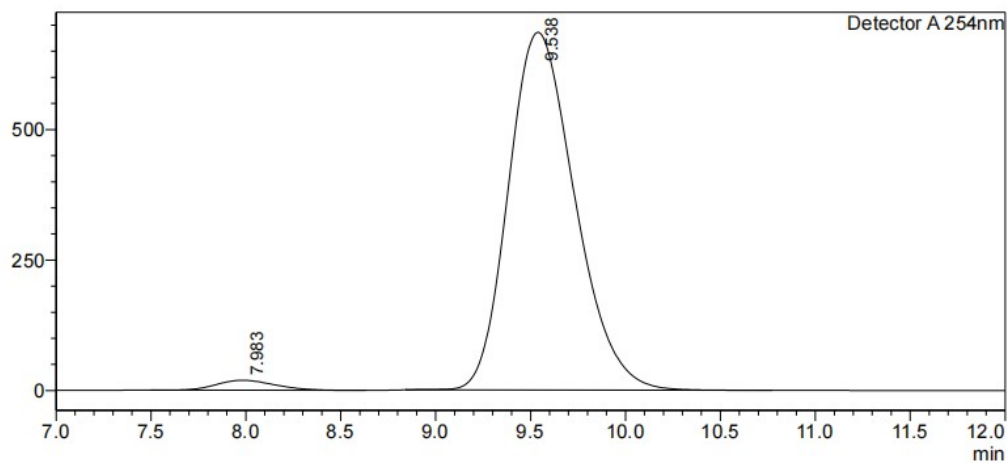

<Peak Table>

Detector A 254nm

| Peak# | Ret. Time | Area     | Height | Conc.  | Unit | Mark | Name |
|-------|-----------|----------|--------|--------|------|------|------|
| 1     | 7.983     | 402683   | 18928  | 2.353  |      | M    |      |
| 2     | 9.538     | 16711307 | 685292 | 97.647 |      | M    |      |
| Total |           | 17113989 | 704220 |        |      |      |      |

3v: AD-H, Hexane/*i*PrOH = 70/30, rate = 1.0 mL/min, 254 nm

<Chromatogram>

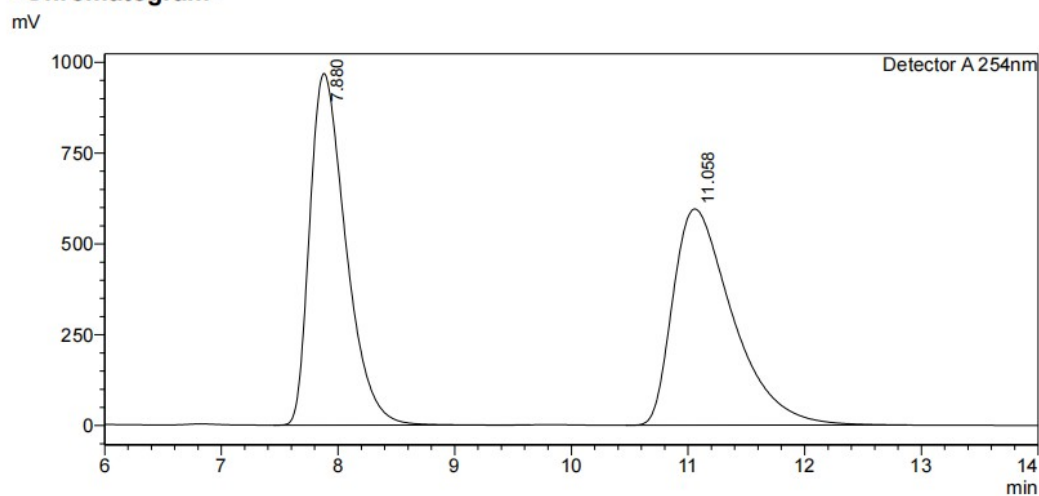

<Peak Table>

Detector A 254nm

| Peak# | Ret. Time | Area     | Height  | Conc.  | Unit | Mark | Name |
|-------|-----------|----------|---------|--------|------|------|------|
| 1     | 7.880     | 20762514 | 967623  | 49.415 |      | M    |      |
| 2     | 11.058    | 21254441 | 595290  | 50.585 |      | M    |      |
| Total |           | 42016955 | 1562912 |        |      |      |      |

<Chromatogram>

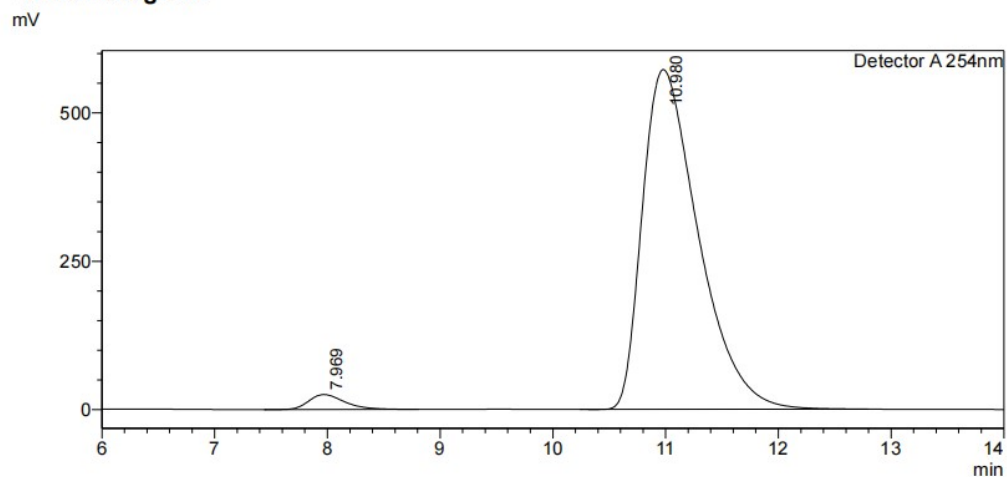

<Peak Table>

Detector A 254nm

| Peak# | Ret. Time | Area     | Height | Conc.  | Unit | Mark | Name |
|-------|-----------|----------|--------|--------|------|------|------|
| 1     | 7.969     | 556323   | 25186  | 2.738  |      | M    |      |
| 2     | 10.980    | 19763477 | 572487 | 97.262 |      | M    |      |
| Total |           | 20319799 | 597673 |        |      |      |      |

3w: IA, Hexane/*i*PrOH = 70/30, rate = 1.0 mL/min, 254 nm

<Chromatogram>

mV

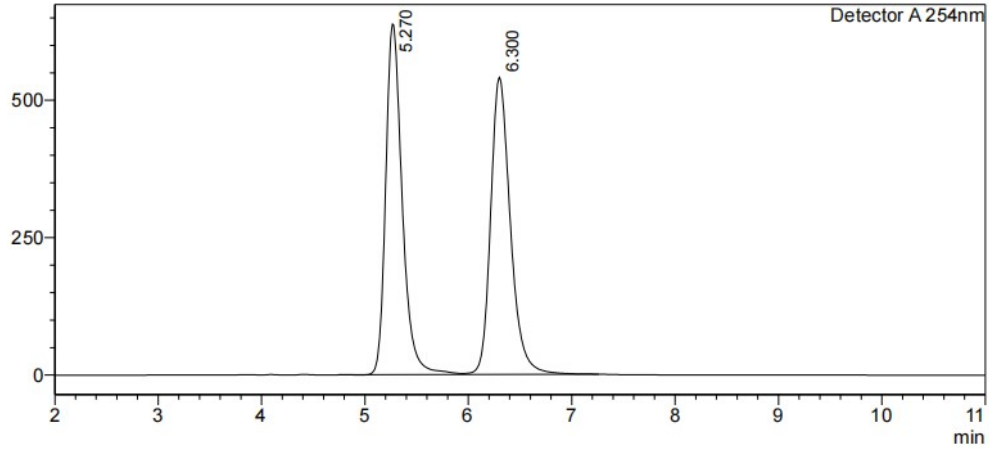

<Peak Table>

Detector A 254nm

| Peak# | Ret. Time | Area     | Height  | Conc.  | Unit | Mark | Name |
|-------|-----------|----------|---------|--------|------|------|------|
| 1     | 5.270     | 7090628  | 637884  | 49.732 |      | M    |      |
| 2     | 6.300     | 7167077  | 540466  | 50.268 |      | V M  |      |
| Total |           | 14257705 | 1178351 |        |      |      |      |

<Chromatogram>

mV

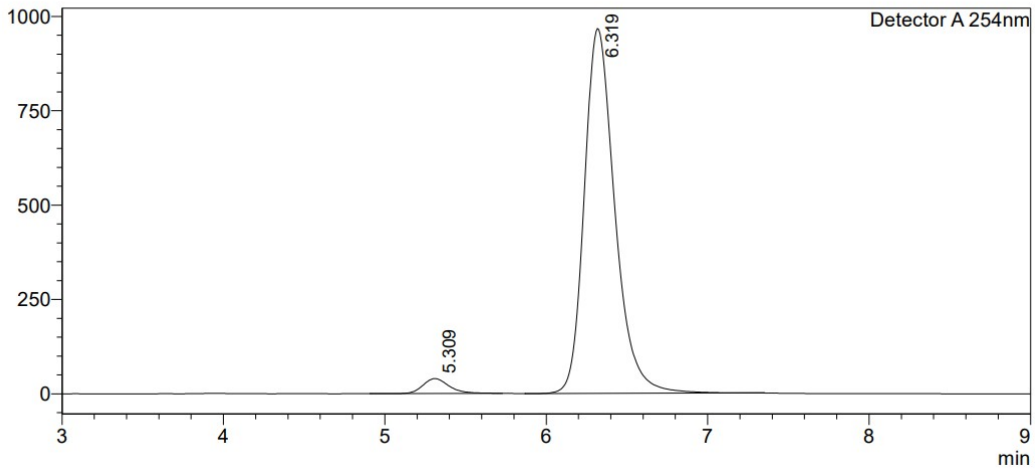

<Peak Table>

Detector A 254nm

| Peak# | Ret. Time | Area     | Height  | Conc.  | Unit | Mark | Name |
|-------|-----------|----------|---------|--------|------|------|------|
| 1     | 5.309     | 447386   | 39581   | 3.400  |      | M    |      |
| 2     | 6.319     | 12709938 | 966541  | 96.600 |      | M    |      |
| Total |           | 13157324 | 1006122 |        |      |      |      |

3x: AD-H, Hexane/*i*PrOH = 70/30, rate = 1.0 mL/min, 254 nm

<Chromatogram>

mV

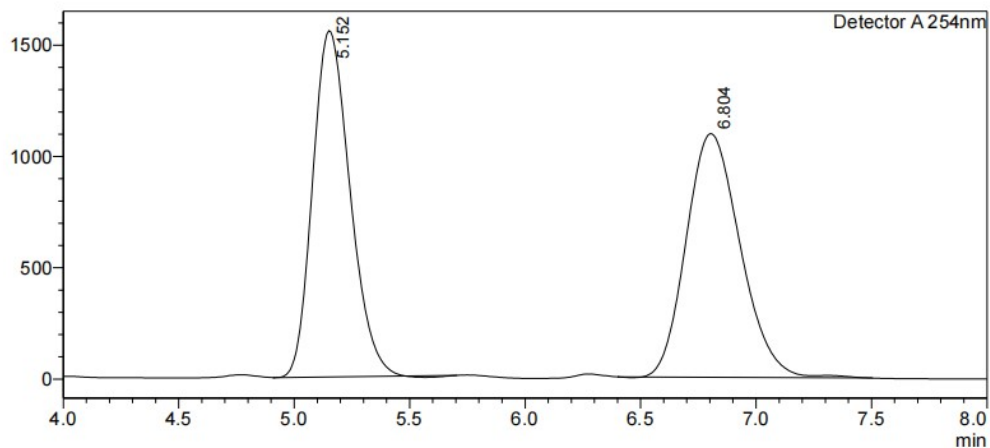

<Peak Table>

Detector A 254nm

| Peak# | Ret. Time | Area     | Height  | Conc.  | Unit | Mark | Name |
|-------|-----------|----------|---------|--------|------|------|------|
| 1     | 5.152     | 17482925 | 1554948 | 49.482 |      | M    |      |
| 2     | 6.804     | 17848807 | 1093742 | 50.518 |      | M    |      |
| Total |           | 35331732 | 2648690 |        |      |      |      |

<Chromatogram>

mV

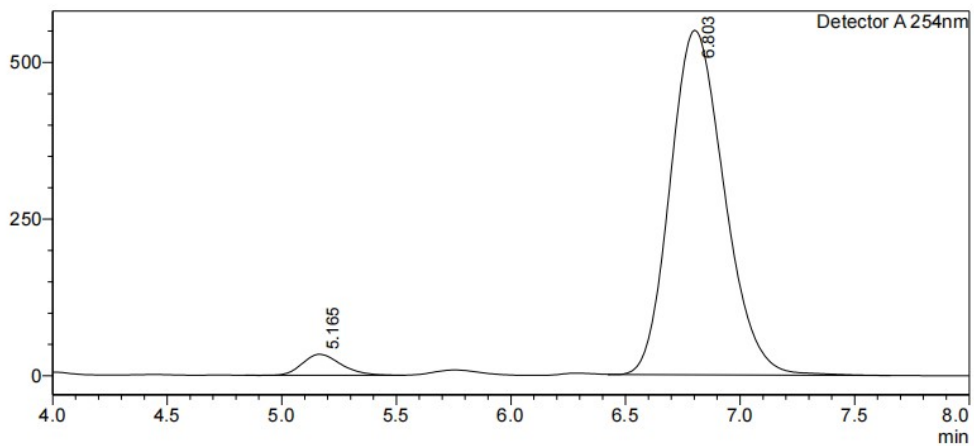

<Peak Table>

Detector A 254nm

| Peak# | Ret. Time | Area    | Height | Conc.  | Unit | Mark | Name |
|-------|-----------|---------|--------|--------|------|------|------|
| 1     | 5.165     | 389666  | 33470  | 4.144  |      | M    |      |
| 2     | 6.803     | 9013588 | 549463 | 95.856 |      | M    |      |
| Total |           | 9403254 | 582932 |        |      |      |      |

3y: IA, Hexane/iPrOH = 70/30, rate = 1.0 mL/min, 254 nm

<Chromatogram>

mV

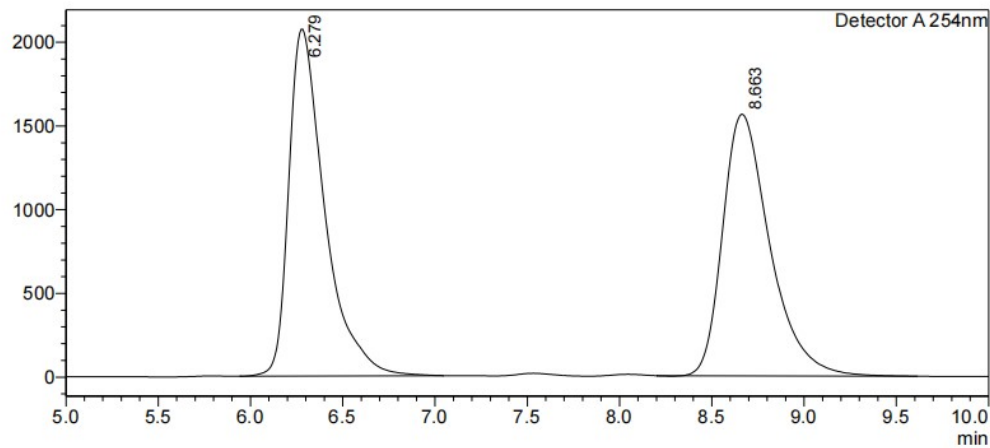

<Peak Table>

Detector A 254nm

| Peak# | Ret. Time | Area     | Height  | Conc.  | Unit | Mark | Name |
|-------|-----------|----------|---------|--------|------|------|------|
| 1     | 6.279     | 28086735 | 2071073 | 50.261 |      | M    |      |
| 2     | 8.663     | 27794973 | 1562857 | 49.739 |      | M    |      |
| Total |           | 55881708 | 3633930 |        |      |      |      |

<Chromatogram>

mV

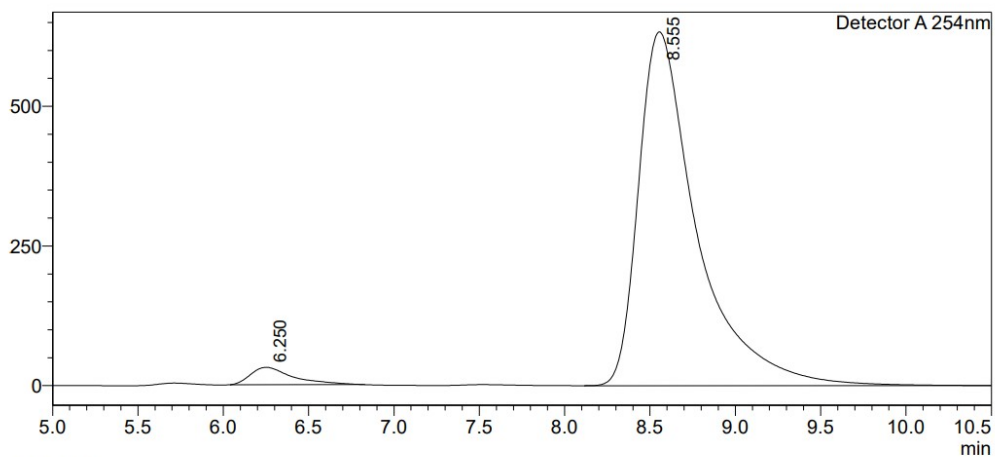

<Peak Table>

Detector A 254nm

| Peak# | Ret. Time | Area     | Height | Conc.  | Unit | Mark | Name |
|-------|-----------|----------|--------|--------|------|------|------|
| 1     | 6.250     | 533678   | 31078  | 3.419  |      | M    |      |
| 2     | 8.555     | 15075850 | 633260 | 96.581 |      | M    |      |
| Total |           | 15609528 | 664338 |        |      |      |      |



3z: AD-H, Hexane/*i*PrOH = 70/30, rate = 1.0 mL/min, 254 nm

<Chromatogram>

mV

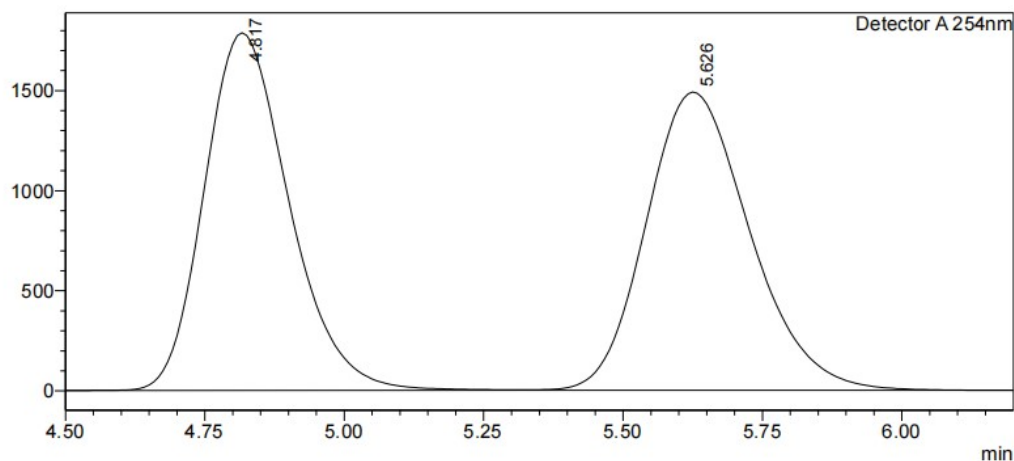

<Peak Table>

Detector A 254nm

| Peak# | Ret. Time | Area     | Height  | Conc.  | Unit | Mark | Name |
|-------|-----------|----------|---------|--------|------|------|------|
| 1     | 4.817     | 18908589 | 1786214 | 49.510 |      | M    |      |
| 2     | 5.626     | 19283207 | 1489662 | 50.490 |      | V M  |      |
| Total |           | 38191796 | 3275877 |        |      |      |      |

<Chromatogram>

mV

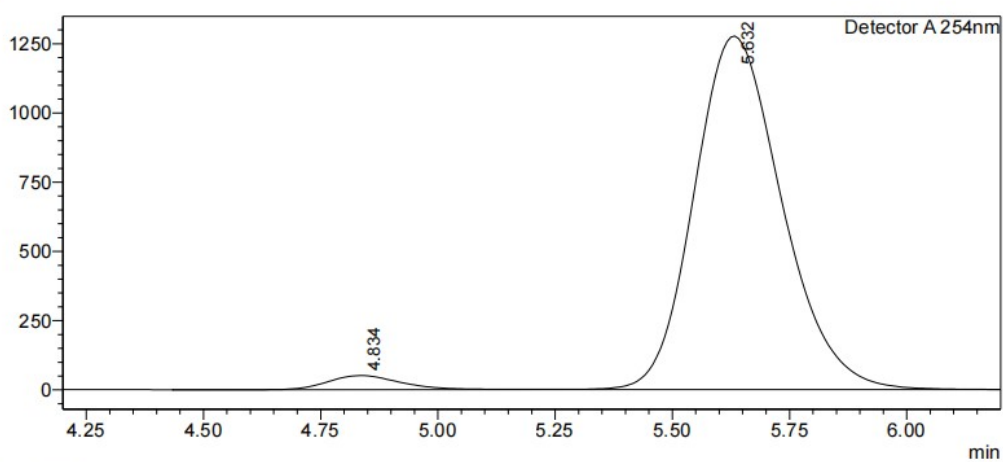

<Peak Table>

Detector A 254nm

| Peak# | Ret. Time | Area     | Height  | Conc.  | Unit | Mark | Name |
|-------|-----------|----------|---------|--------|------|------|------|
| 1     | 4.834     | 558077   | 50888   | 3.248  |      | M    |      |
| 2     | 5.632     | 16623452 | 1276331 | 96.752 |      | V M  |      |
| Total |           | 17181529 | 1327219 |        |      |      |      |

3aa: AD-H, Hexane/*i*PrOH = 70/30, rate = 1.0 mL/min, 254 nm

<Chromatogram>

mV

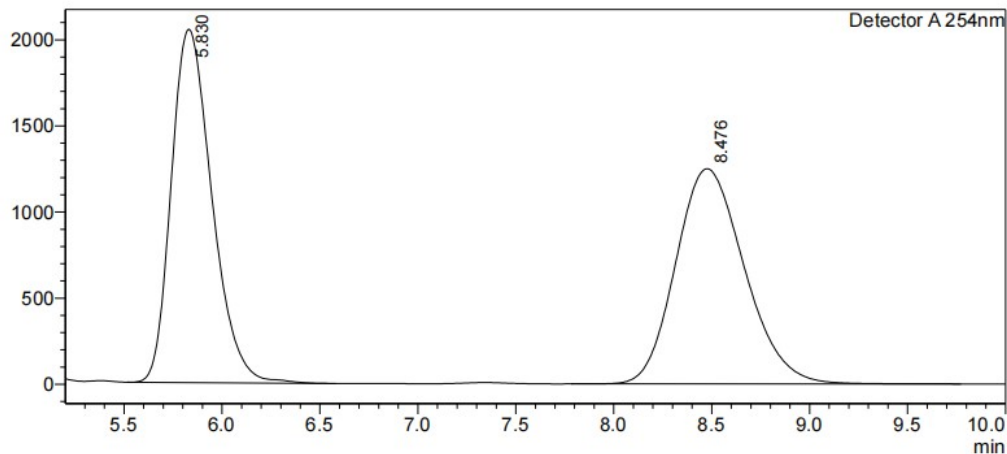

<Peak Table>

Detector A 254nm

| Peak# | Ret. Time | Area     | Height  | Conc.  | Unit | Mark | Name |
|-------|-----------|----------|---------|--------|------|------|------|
| 1     | 5.830     | 29629170 | 2051002 | 49.259 |      | M    |      |
| 2     | 8.476     | 30520234 | 1249179 | 50.741 |      | M    |      |
| Total |           | 60149404 | 3300180 |        |      |      |      |

<Chromatogram>

mV

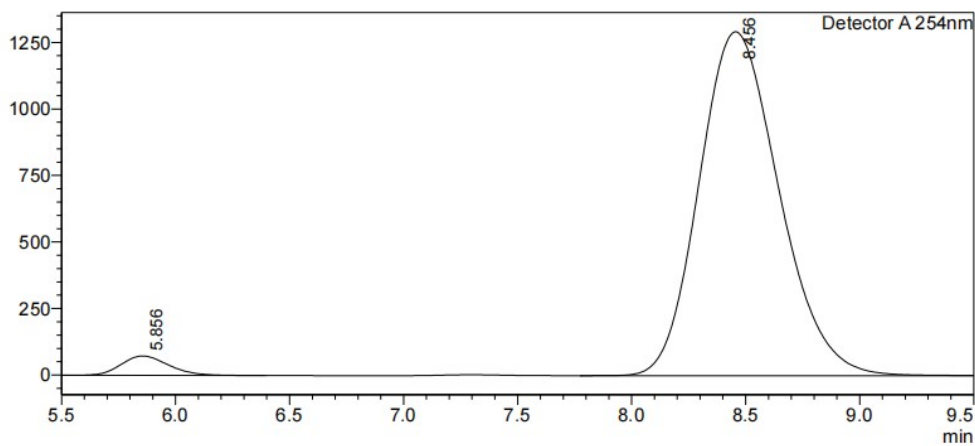

<Peak Table>

Detector A 254nm

| Peak# | Ret. Time | Area     | Height  | Conc.  | Unit | Mark | Name |
|-------|-----------|----------|---------|--------|------|------|------|
| 1     | 5.856     | 1056346  | 72954   | 3.246  |      | M    |      |
| 2     | 8.456     | 31483648 | 1292401 | 96.754 |      | M    |      |
| Total |           | 32539993 | 1365355 |        |      |      |      |

3ab: AD-H, Hexane/*i*PrOH = 70/30, rate = 1.0 mL/min, 254 nm

<Chromatogram>

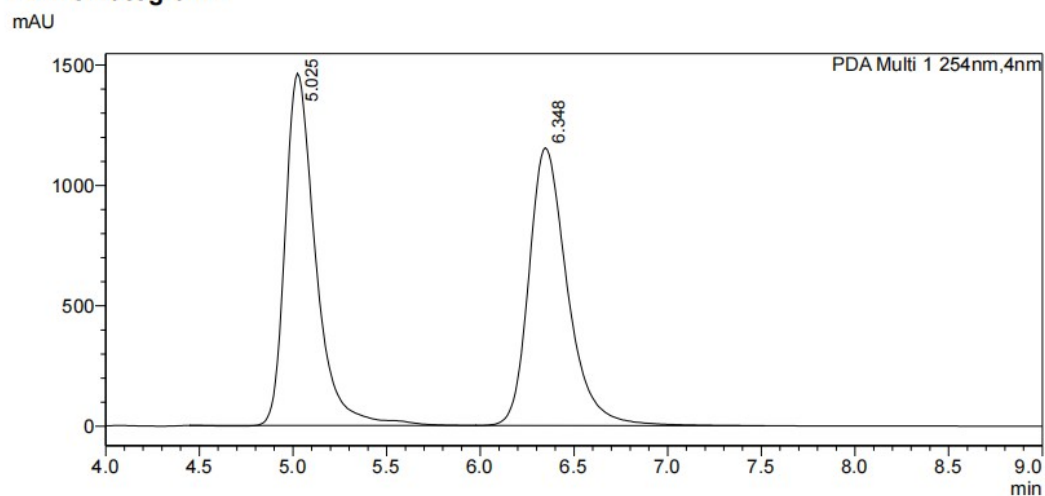

<Peak Table>

PDA Ch1 254nm

| Peak# | Ret. Time | Area     | Height  | Area%   | Conc. | Name |
|-------|-----------|----------|---------|---------|-------|------|
| 1     | 5.025     | 16492872 | 1461946 | 50.006  | 0.000 |      |
| 2     | 6.348     | 16489096 | 1153951 | 49.994  | 0.000 |      |
| Total |           | 32981967 | 2615898 | 100.000 |       |      |

<Chromatogram>

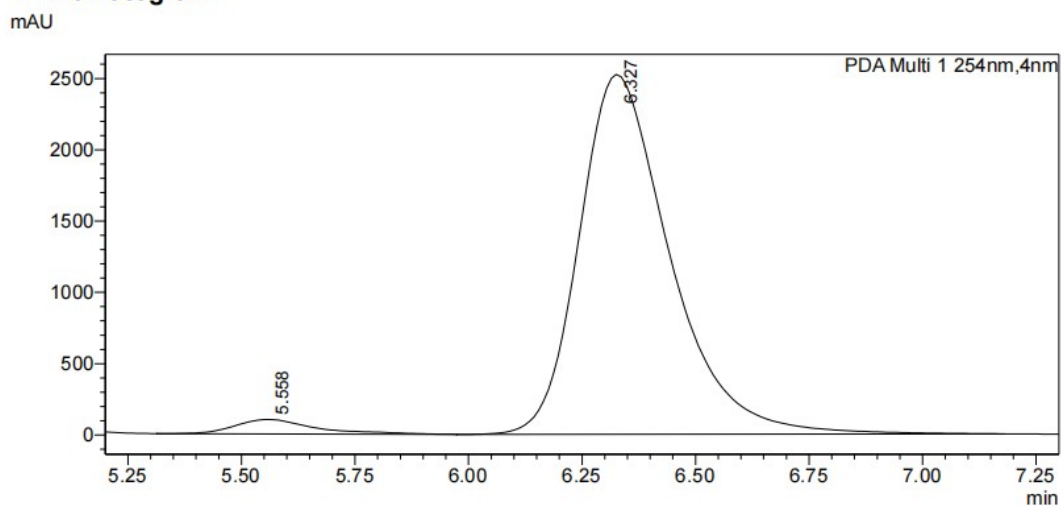

<Peak Table>

PDA Ch1 254nm

| Peak# | Ret. Time | Area     | Height  | Area%   | Conc. | Name |
|-------|-----------|----------|---------|---------|-------|------|
| 1     | 5.558     | 1227764  | 101181  | 3.387   | 0.000 |      |
| 2     | 6.327     | 35016378 | 2522830 | 96.613  | 0.000 |      |
| Total |           | 36244142 | 2624011 | 100.000 |       |      |

3ac: OD-H, Hexane/*i*PrOH = 94/6, rate = 0.6 mL/min, 254 nm

<Chromatogram>

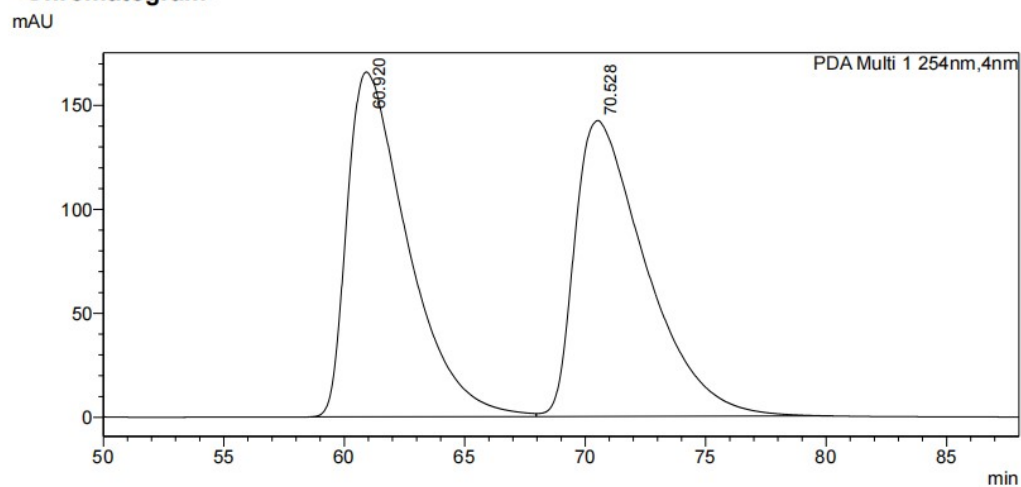

<Peak Table>

PDA Ch1 254nm

| Peak# | Ret. Time | Area     | Height | Area%   | Conc. | Name |
|-------|-----------|----------|--------|---------|-------|------|
| 1     | 60.920    | 28988084 | 165763 | 49.777  | 0.000 |      |
| 2     | 70.528    | 29248064 | 142266 | 50.223  | 0.000 |      |
| Total |           | 58236148 | 308030 | 100.000 |       |      |

<Chromatogram>

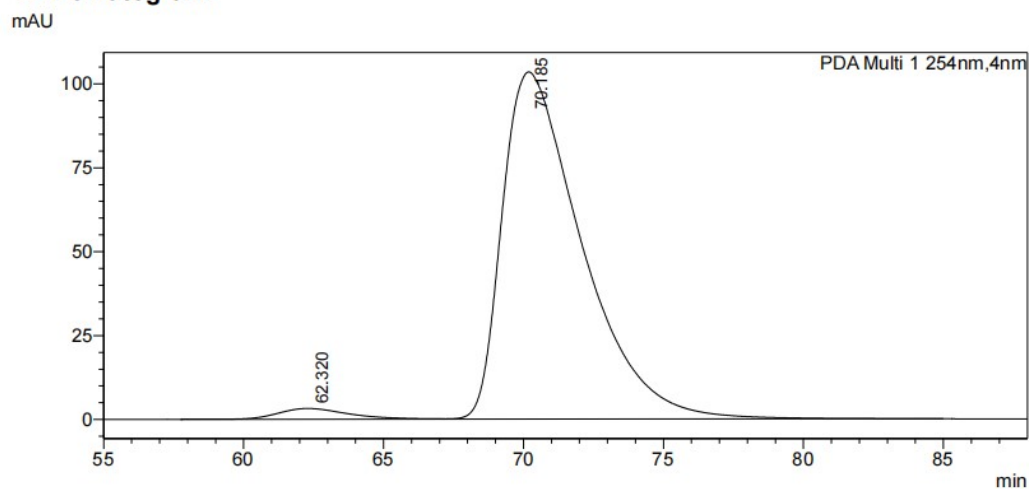

<Peak Table>

PDA Ch1 254nm

| Peak# | Ret. Time | Area     | Height | Area%   | Conc. | Name |
|-------|-----------|----------|--------|---------|-------|------|
| 1     | 62.320    | 552768   | 3192   | 2.629   | 0.000 |      |
| 2     | 70.185    | 20469840 | 103422 | 97.371  | 0.000 |      |
| Total |           | 21022607 | 106614 | 100.000 |       |      |

3ad: IA, Hexane/iPrOH = 70/30, rate = 1.0 mL/min, 254 nm

<Chromatogram>

mV

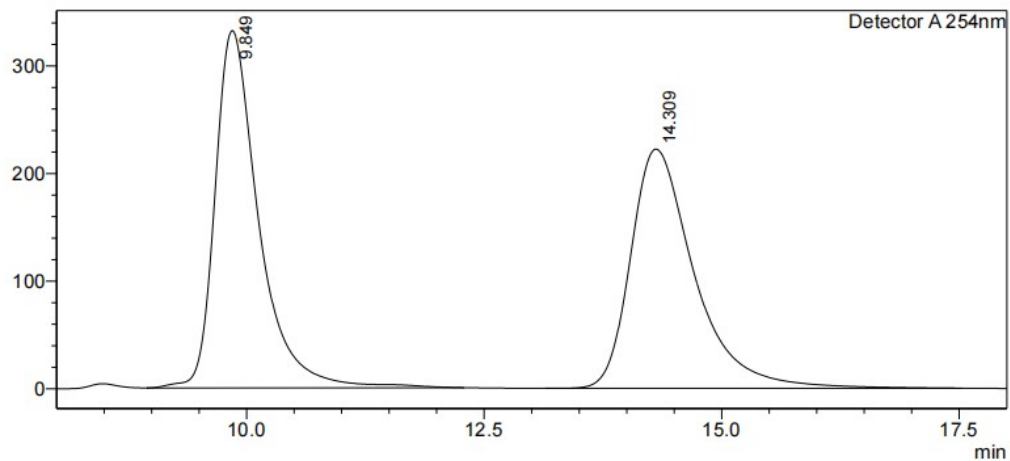

<Peak Table>

Detector A 254nm

| Peak# | Ret. Time | Area     | Height | Conc.  | Unit | Mark | Name |
|-------|-----------|----------|--------|--------|------|------|------|
| 1     | 9.849     | 10630111 | 332129 | 50.584 |      | M    |      |
| 2     | 14.309    | 10384746 | 222432 | 49.416 |      | M    |      |
| Total |           | 21014857 | 554560 |        |      |      |      |

<Chromatogram>

mV

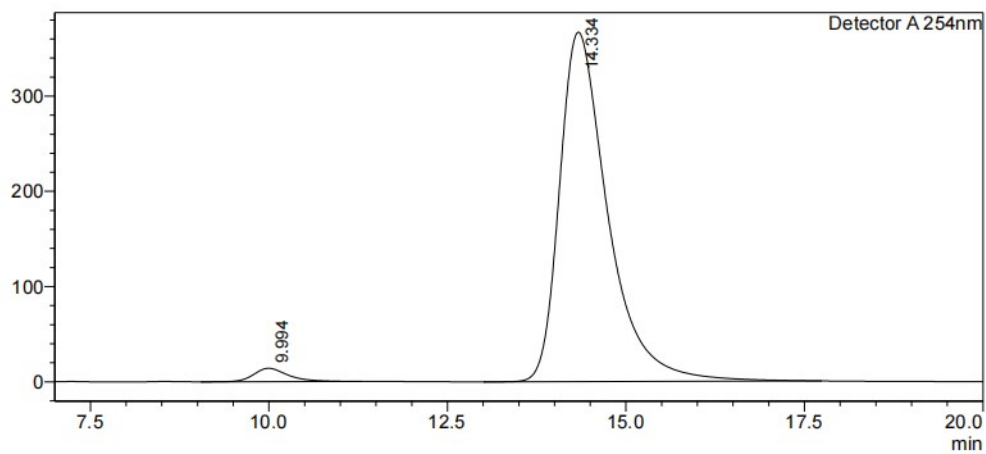

<Peak Table>

Detector A 254nm

| Peak# | Ret. Time | Area     | Height | Conc.  | Unit | Mark | Name |
|-------|-----------|----------|--------|--------|------|------|------|
| 1     | 9.994     | 473620   | 14093  | 2.665  |      | M    |      |
| 2     | 14.334    | 17296143 | 366977 | 97.335 |      | M    |      |
| Total |           | 17769763 | 381070 |        |      |      |      |

(*R*)-7d: IA, Hexane/*i*PrOH = 70/30, rate = 1.0 mL/min, 254 nm

<Chromatogram>

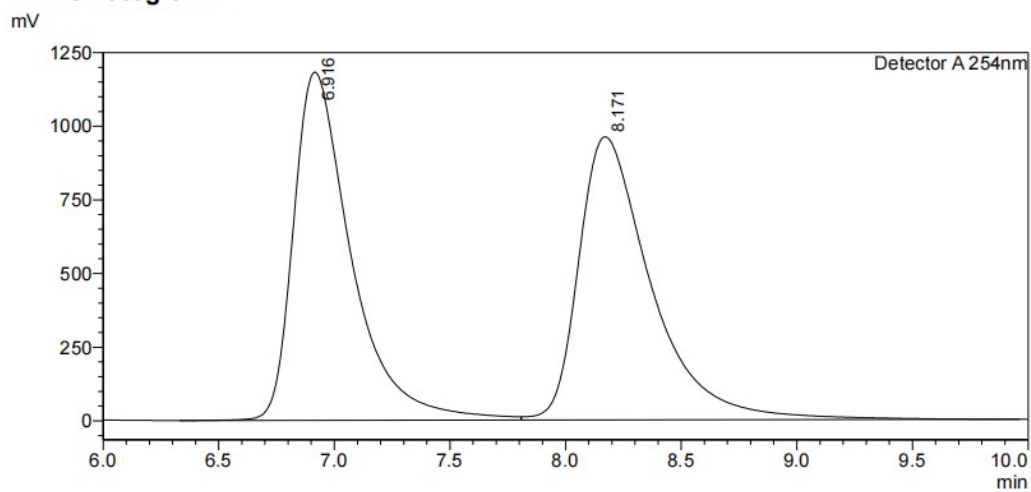

<Peak Table>

| Detector A 254nm |           |          |         |        |      |      |      |
|------------------|-----------|----------|---------|--------|------|------|------|
| Peak#            | Ret. Time | Area     | Height  | Conc.  | Unit | Mark | Name |
| 1                | 6.916     | 20571455 | 1182034 | 49.478 |      | M    |      |
| 2                | 8.171     | 21005165 | 960430  | 50.522 |      | V M  |      |
| Total            |           | 41576621 | 2142464 |        |      |      |      |

<Chromatogram>

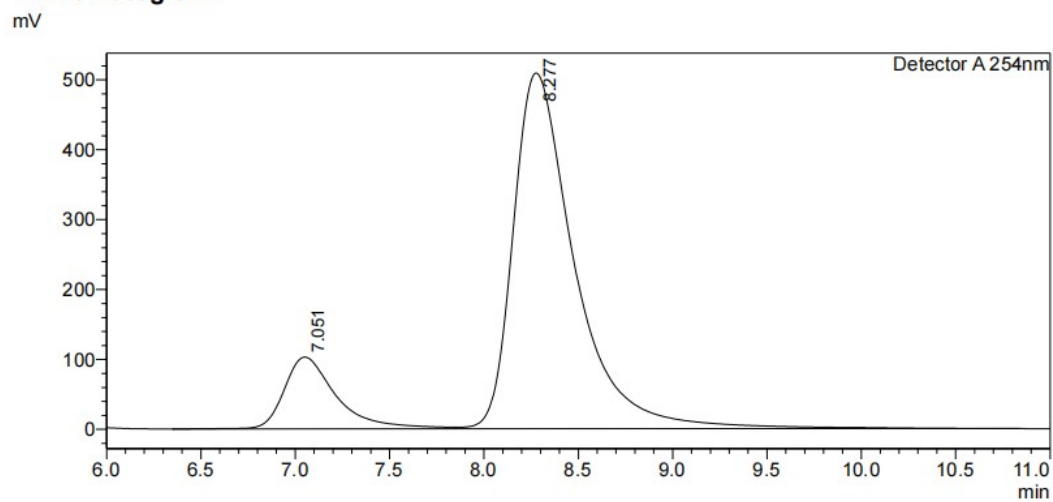

<Peak Table>

| Detector A 254nm |           |          |        |        |      |      |      |
|------------------|-----------|----------|--------|--------|------|------|------|
| Peak#            | Ret. Time | Area     | Height | Conc.  | Unit | Mark | Name |
| 1                | 7.051     | 1982256  | 102765 | 14.650 |      | M    |      |
| 2                | 8.277     | 11548219 | 508888 | 85.350 |      | V M  |      |
| Total            |           | 13530475 | 611653 |        |      |      |      |

(*S*)-**6a**: OD-H, Hexane/*i*PrOH = 90/10, rate = 0.8 mL/min, 254 nm

<Chromatogram>

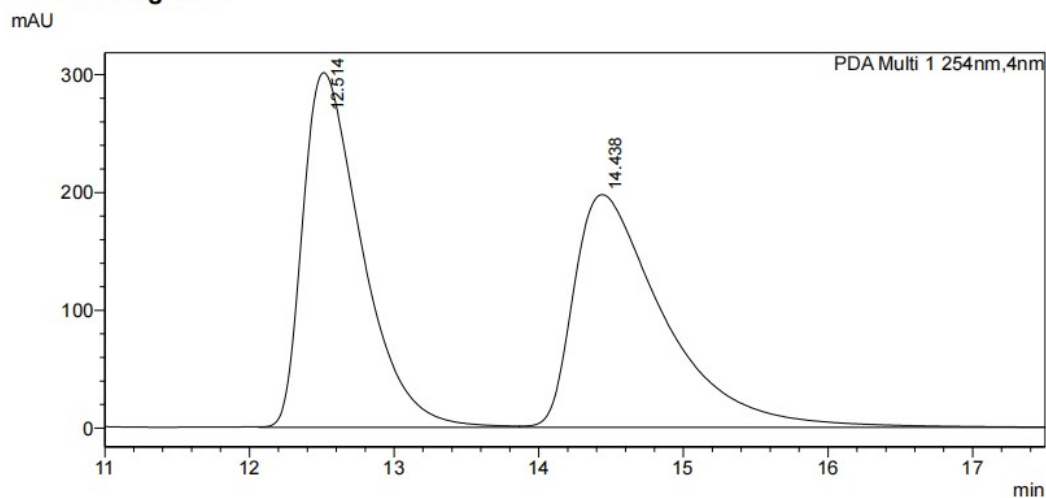

<Peak Table>

PDA Ch1 254nm

| Peak# | Ret. Time | Area     | Height | Area%   | Conc. | Name |
|-------|-----------|----------|--------|---------|-------|------|
| 1     | 12.514    | 8554589  | 301188 | 49.877  | 0.000 |      |
| 2     | 14.438    | 8596934  | 197601 | 50.123  | 0.000 |      |
| Total |           | 17151523 | 498789 | 100.000 |       |      |

<Chromatogram>

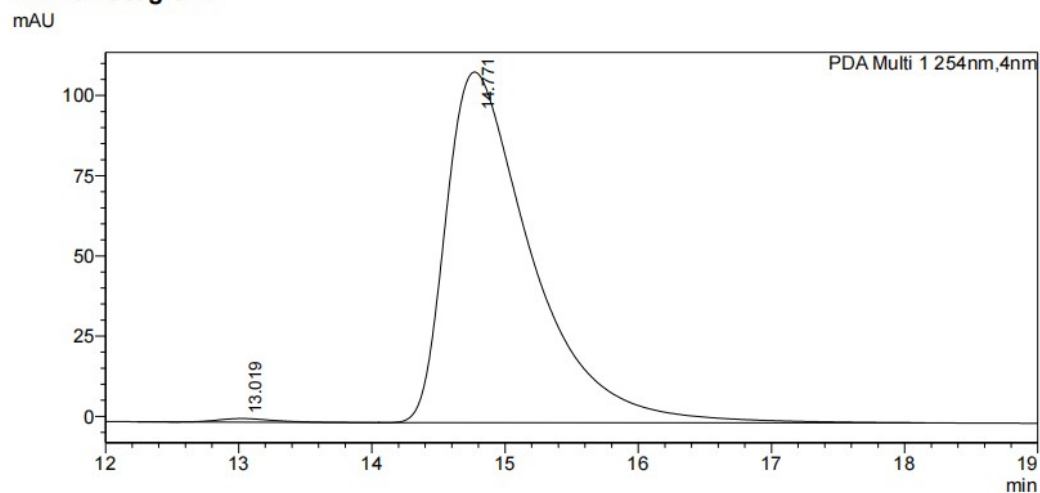

<Peak Table>

PDA Ch1 254nm

| Peak# | Ret. Time | Area    | Height | Area%   | Conc. | Name |
|-------|-----------|---------|--------|---------|-------|------|
| 1     | 13.019    | 32664   | 1125   | 0.662   | 0.000 |      |
| 2     | 14.771    | 4900132 | 109264 | 99.338  | 0.000 |      |
| Total |           | 4932796 | 110389 | 100.000 |       |      |

(*R*)-7e: IA, Hexane/*i*PrOH = 90/10, rate = 1.0 mL/min, 254 nm

<Chromatogram>

mV

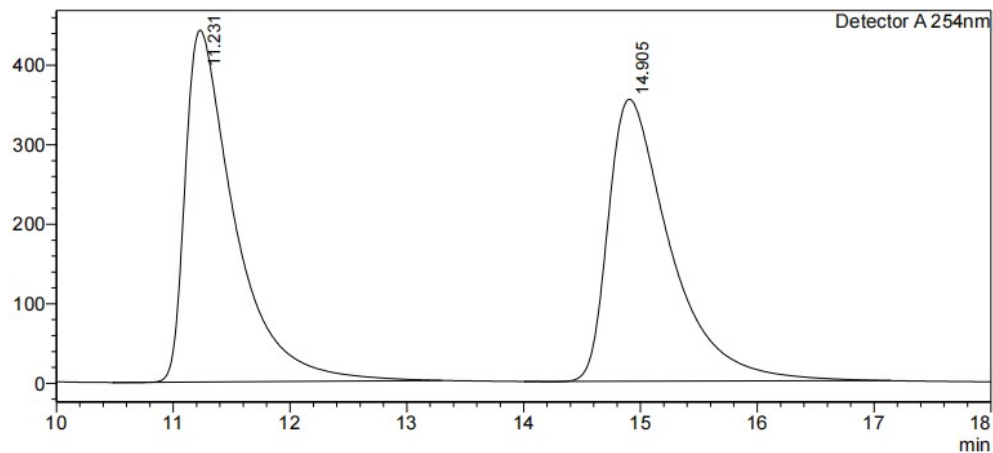

<Peak Table>

Detector A 254nm

| Peak# | Ret. Time | Area     | Height | Conc.  | Unit | Mark | Name |
|-------|-----------|----------|--------|--------|------|------|------|
| 1     | 11.231    | 13026781 | 442491 | 49.854 |      | M    |      |
| 2     | 14.905    | 13103023 | 354824 | 50.146 |      | M    |      |
| Total |           | 26129805 | 797315 |        |      |      |      |

<Chromatogram>

mV

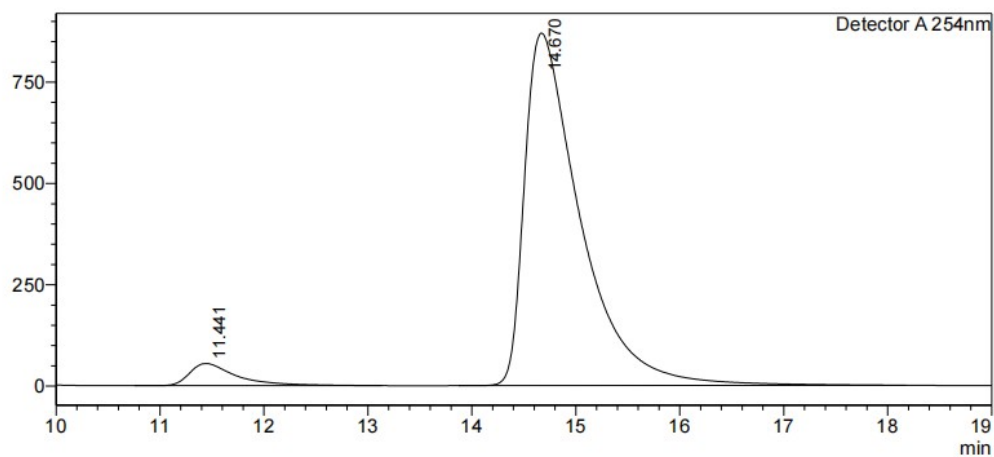

<Peak Table>

Detector A 254nm

| Peak# | Ret. Time | Area     | Height | Conc.  | Unit | Mark | Name |
|-------|-----------|----------|--------|--------|------|------|------|
| 1     | 11.441    | 1693271  | 54421  | 4.951  |      | M    |      |
| 2     | 14.670    | 32505155 | 869609 | 95.049 |      | M    |      |
| Total |           | 34198426 | 924030 |        |      |      |      |



(S)-6b: OD-H, Hexane/*i*PrOH = 95/5, rate = 0.6 mL/min, 254 nm

<Chromatogram>

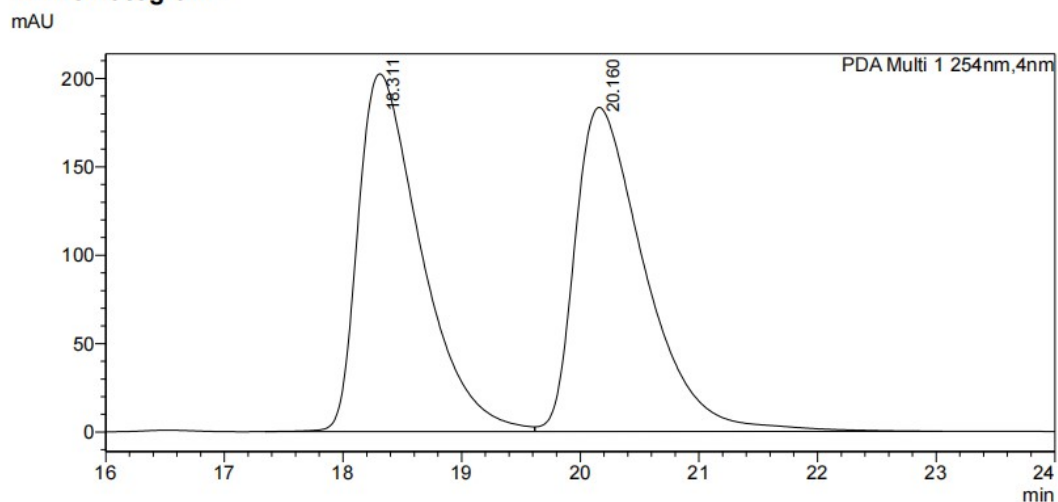

<Peak Table>

PDA Ch1 254nm

| Peak# | Ret. Time | Area     | Height | Area%   | Conc. | Name |
|-------|-----------|----------|--------|---------|-------|------|
| 1     | 18.311    | 7448096  | 202308 | 49.791  | 0.000 |      |
| 2     | 20.160    | 7510573  | 183277 | 50.209  | 0.000 |      |
| Total |           | 14958669 | 385584 | 100.000 |       |      |

<Chromatogram>

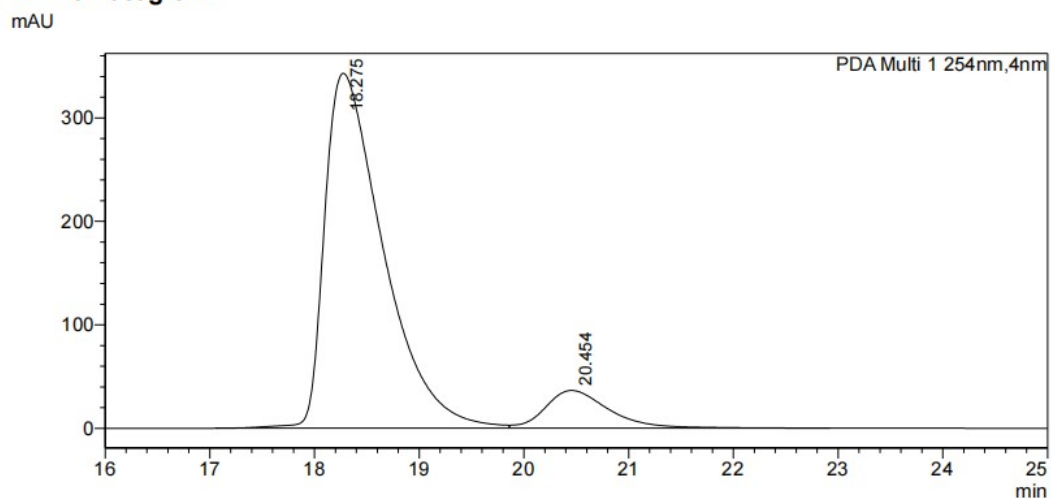

<Peak Table>

PDA Ch1 254nm

| Peak# | Ret. Time | Area     | Height | Area%   | Conc. | Name |
|-------|-----------|----------|--------|---------|-------|------|
| 1     | 18.275    | 13334816 | 343012 | 89.636  | 0.000 |      |
| 2     | 20.454    | 1541801  | 36478  | 10.364  | 0.000 |      |
| Total |           | 14876617 | 379490 | 100.000 |       |      |

(R)-7f: IA, Hexane/*i*PrOH = 90/10, rate = 0.8 mL/min, 254 nm

<Chromatogram>

mV

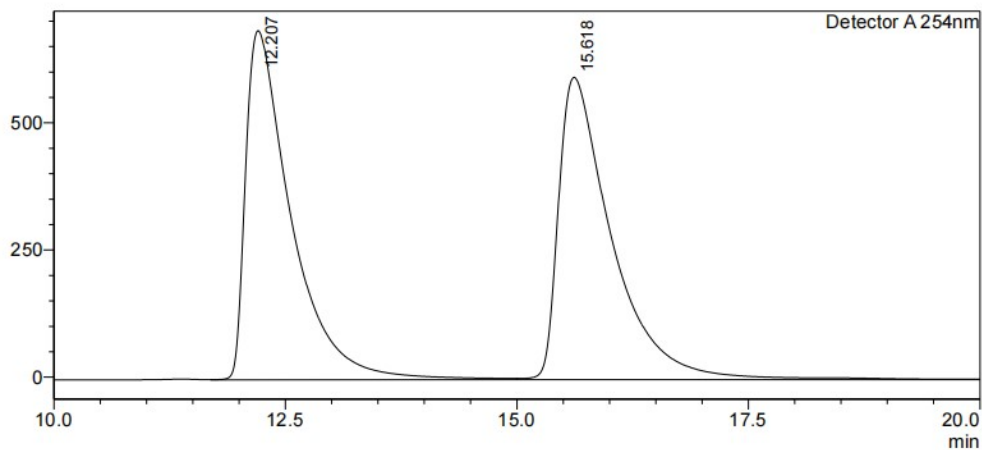

<Peak Table>

Detector A 254nm

| Peak# | Ret. Time | Area     | Height  | Conc.  | Unit | Mark | Name |
|-------|-----------|----------|---------|--------|------|------|------|
| 1     | 12.207    | 23509783 | 686344  | 49.508 |      |      |      |
| 2     | 15.618    | 23976746 | 594572  | 50.492 |      | V    |      |
| Total |           | 47486529 | 1280917 |        |      |      |      |

<Chromatogram>

mV

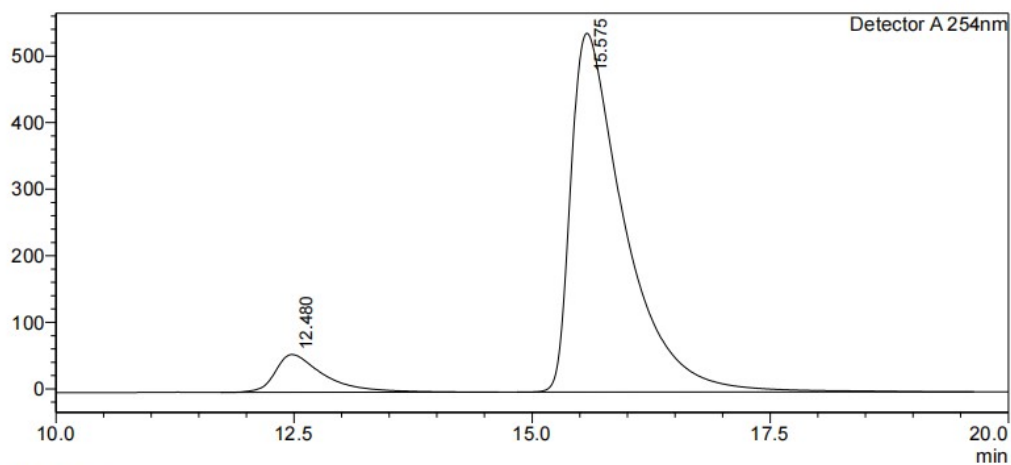

<Peak Table>

Detector A 254nm

| Peak# | Ret. Time | Area     | Height | Conc.  | Unit | Mark | Name |
|-------|-----------|----------|--------|--------|------|------|------|
| 1     | 12.480    | 2043918  | 56871  | 8.795  |      |      |      |
| 2     | 15.575    | 21196469 | 538965 | 91.205 |      |      |      |
| Total |           | 23240387 | 595836 |        |      |      |      |

(*S*)-6c: IA, Hexane/*i*PrOH = 92/8, rate = 0.6 mL/min, 254 nm

<Chromatogram>

mAU

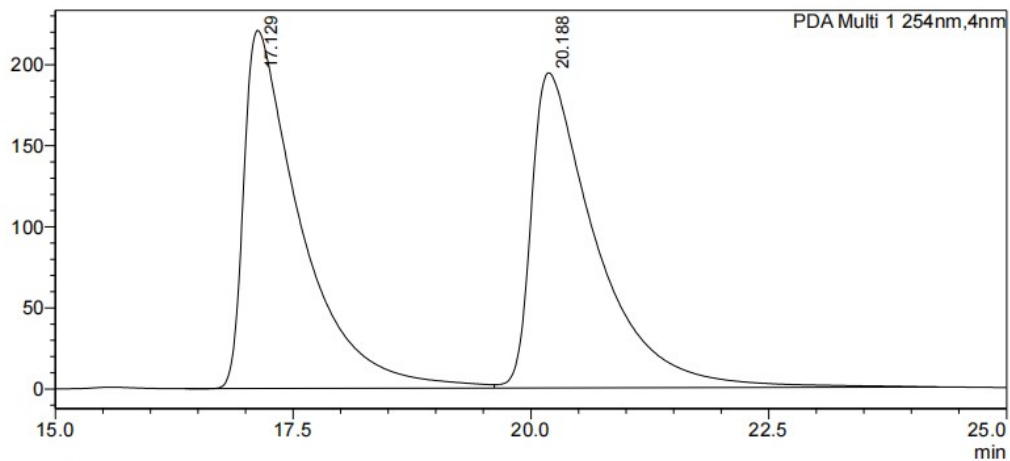

<Peak Table>

PDA Ch1 254nm

| Peak# | Ret. Time | Area     | Height | Area%   | Conc. | Name |
|-------|-----------|----------|--------|---------|-------|------|
| 1     | 17.129    | 9210339  | 220823 | 49.957  | 0.000 |      |
| 2     | 20.188    | 9226068  | 194217 | 50.043  | 0.000 |      |
| Total |           | 18436407 | 415040 | 100.000 |       |      |

<Chromatogram>

mAU

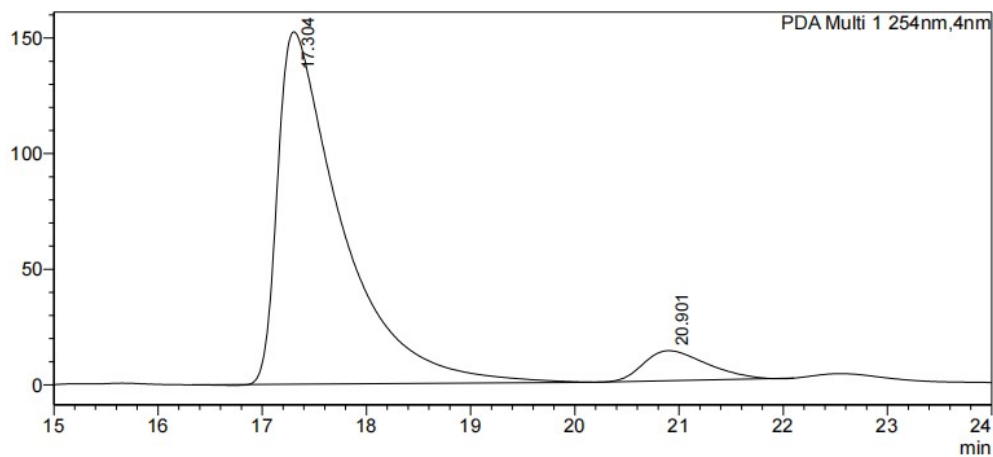

<Peak Table>

PDA Ch1 254nm

| Peak# | Ret. Time | Area    | Height | Area%   | Conc. | Name |
|-------|-----------|---------|--------|---------|-------|------|
| 1     | 17.304    | 6491933 | 152381 | 92.245  | 0.000 |      |
| 2     | 20.901    | 545777  | 12963  | 7.755   | 0.000 |      |
| Total |           | 7037710 | 165344 | 100.000 |       |      |

6w: OD-H, Hexane/iPrOH = 70/30, rate = 1.0 mL/min, 254 nm

<Chromatogram>

mV

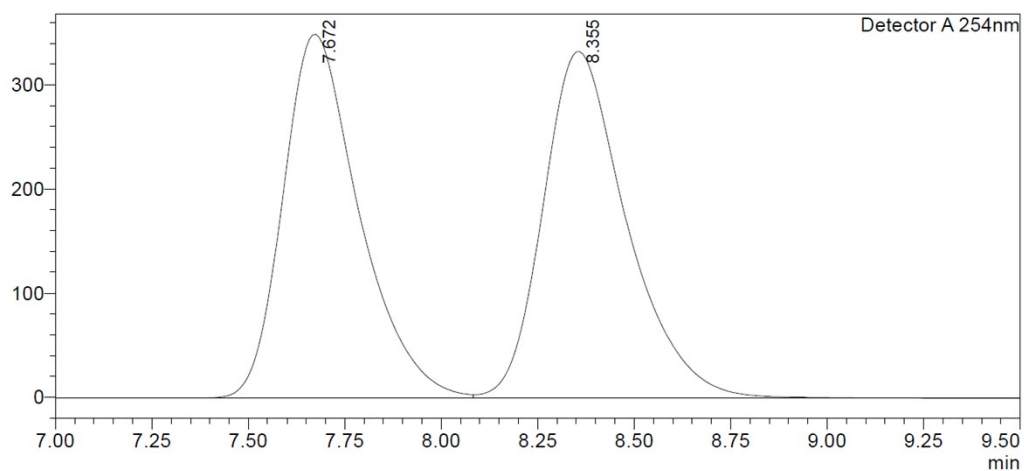

<Peak Table>

Detector A 254nm

| Peak# | Ret. Time | Area    | Height | Conc.  | Unit | Mark | Name |
|-------|-----------|---------|--------|--------|------|------|------|
| 1     | 7.672     | 4812184 | 349769 | 48.858 |      |      |      |
| 2     | 8.355     | 5037209 | 333174 | 51.142 |      | SV   |      |
| Total |           | 9849393 | 682943 |        |      |      |      |

<Chromatogram>

mV

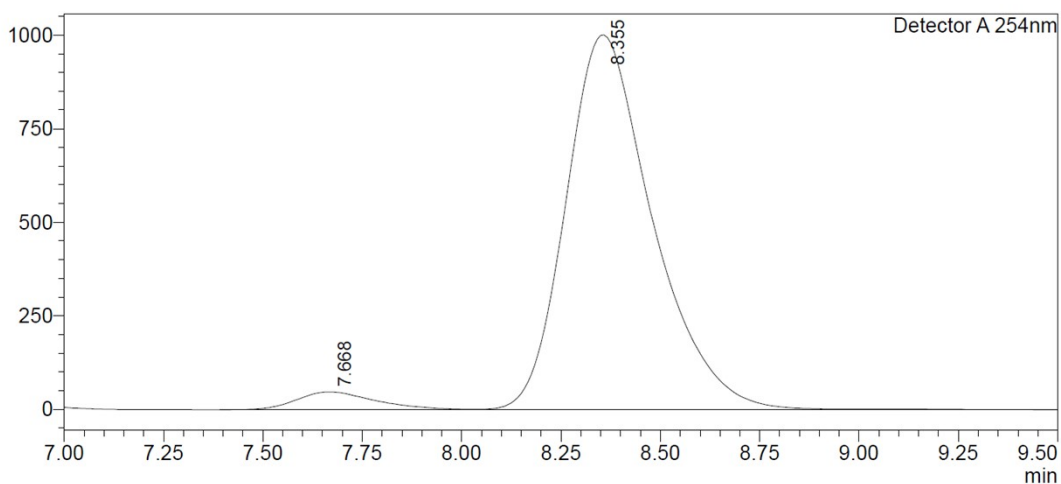

<Peak Table>

Detector A 254nm

| Peak# | Ret. Time | Area     | Height  | Conc.  | Unit | Mark | Name |
|-------|-----------|----------|---------|--------|------|------|------|
| 1     | 7.668     | 668244   | 47923   | 4.203  |      |      |      |
| 2     | 8.355     | 15229833 | 1001753 | 95.797 |      | V    |      |
| Total |           | 15898076 | 1049676 |        |      |      |      |

7a: IA, Hexane/iPrOH = 70/30, rate = 1.0 mL/min, 254 nm

<Chromatogram>

mV

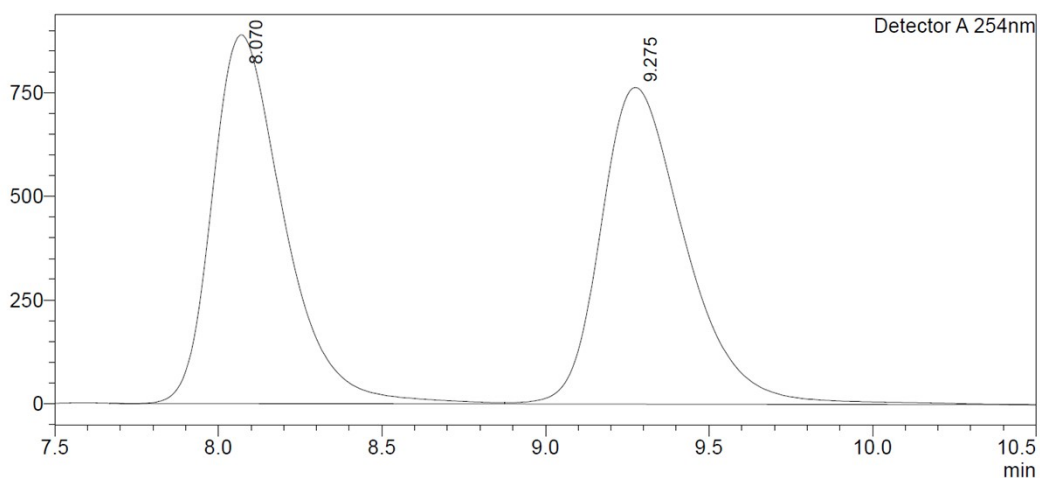

<Peak Table>

Detector A 254nm

| Peak# | Ret. Time | Area     | Height  | Conc.  | Unit | Mark | Name |
|-------|-----------|----------|---------|--------|------|------|------|
| 1     | 8.070     | 13576615 | 888641  | 49.603 |      | M    |      |
| 2     | 9.275     | 13793765 | 763567  | 50.397 |      | V M  |      |
| Total |           | 27370380 | 1652208 |        |      |      |      |

<Chromatogram>

mV

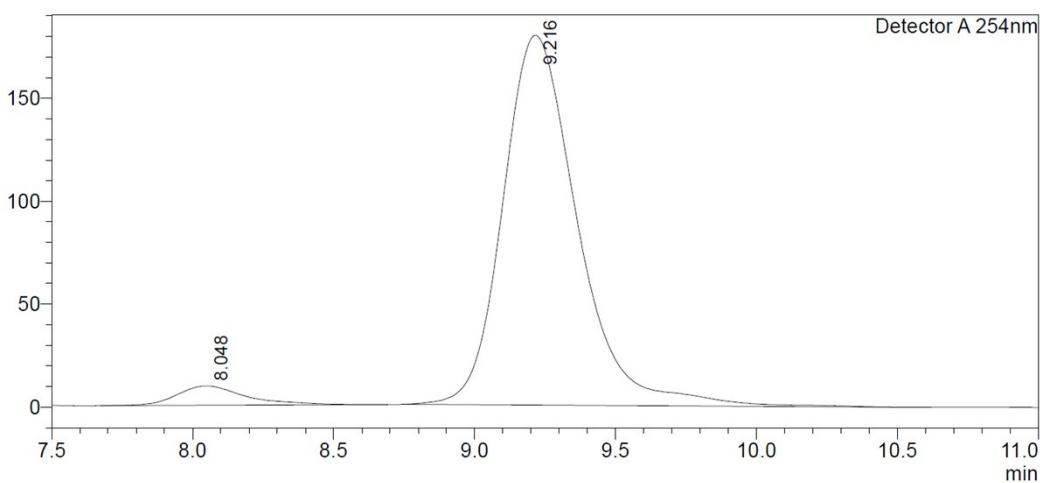

<Peak Table>

Detector A 254nm

| Peak# | Ret. Time | Area    | Height | Conc.  | Unit | Mark | Name |
|-------|-----------|---------|--------|--------|------|------|------|
| 1     | 8.048     | 161376  | 9423   | 4.648  |      | M    |      |
| 2     | 9.216     | 3310370 | 179610 | 95.352 |      | M    |      |
| Total |           | 3471746 | 189033 |        |      |      |      |

7b: IA, Hexane/*i*PrOH = 70/30, rate = 1.0 mL/min, 254 nm

<Chromatogram>

mV

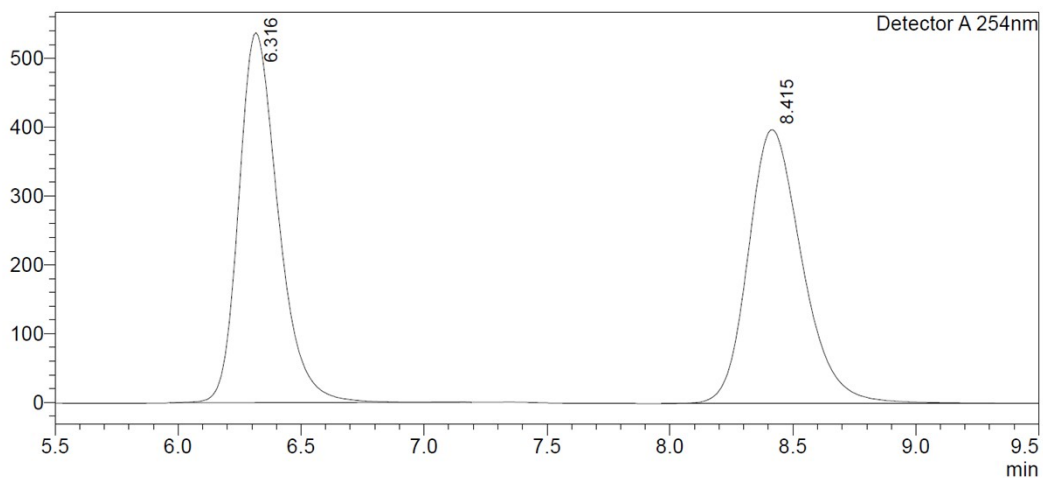

<Peak Table>

Detector A 254nm

| Peak# | Ret. Time | Area     | Height | Conc.  | Unit | Mark | Name |
|-------|-----------|----------|--------|--------|------|------|------|
| 1     | 6.316     | 6018264  | 537511 | 49.664 |      | M    |      |
| 2     | 8.415     | 6099718  | 398037 | 50.336 |      |      |      |
| Total |           | 12117982 | 935549 |        |      |      |      |

<Chromatogram>

mV

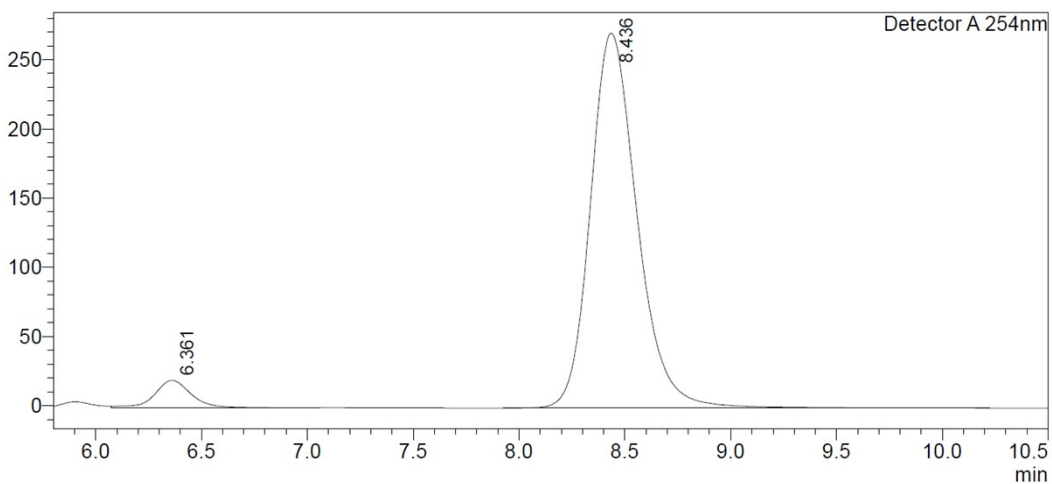

<Peak Table>

Detector A 254nm

| Peak# | Ret. Time | Area    | Height | Conc.  | Unit | Mark | Name |
|-------|-----------|---------|--------|--------|------|------|------|
| 1     | 6.361     | 243124  | 19949  | 5.523  |      |      |      |
| 2     | 8.436     | 4159063 | 270880 | 94.477 |      |      |      |
| Total |           | 4402187 | 290829 |        |      |      |      |

7c: AD-H, Hexane/*i*PrOH = 70/30, rate = 1.0 mL/min, 254 nm

<Chromatogram>

mV

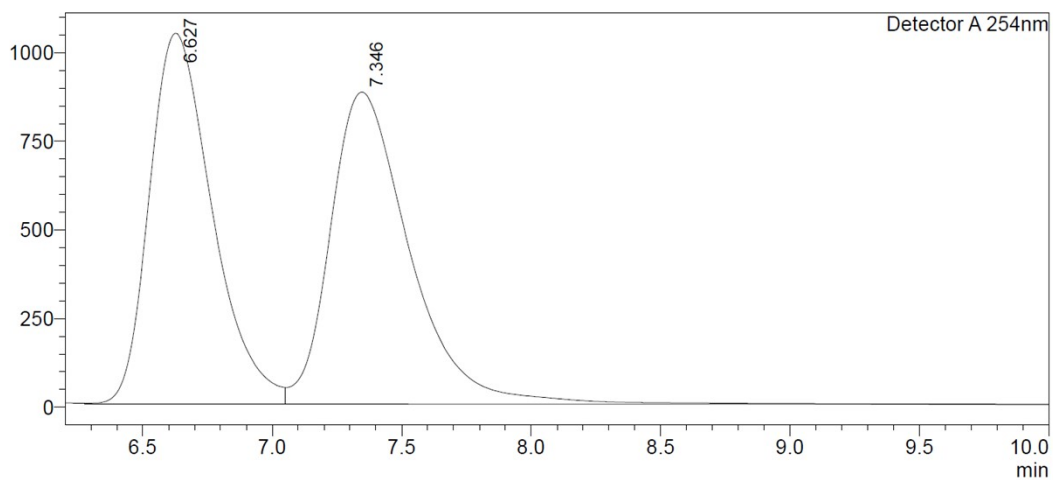

<Peak Table>

Detector A 254nm

| Peak# | Ret. Time | Area     | Height  | Conc.  | Unit | Mark | Name |
|-------|-----------|----------|---------|--------|------|------|------|
| 1     | 6.627     | 17679989 | 1045984 | 48.414 |      |      |      |
| 2     | 7.346     | 18838540 | 879798  | 51.586 |      | V    |      |
| Total |           | 36518529 | 1925782 |        |      |      |      |

<Chromatogram>

mV

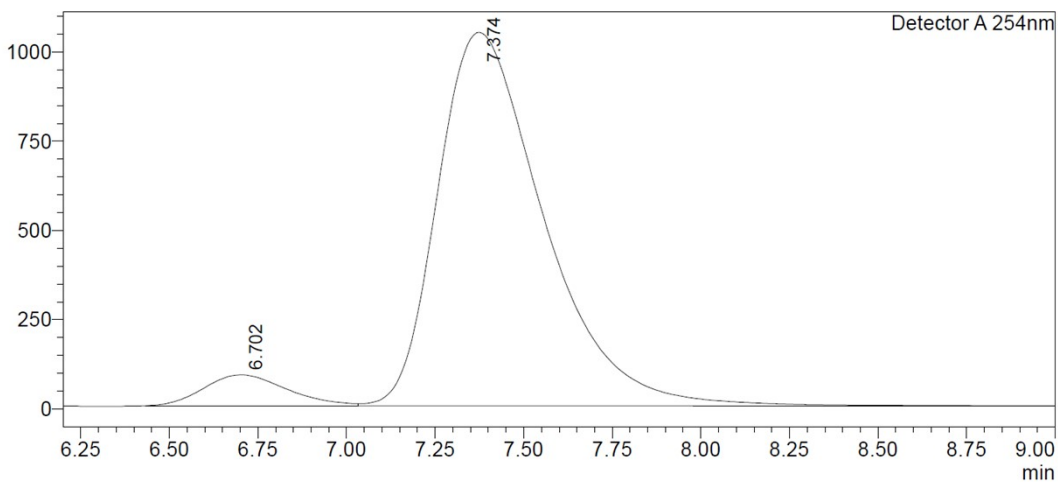

<Peak Table>

Detector A 254nm

| Peak# | Ret. Time | Area     | Height  | Conc.  | Unit | Mark | Name |
|-------|-----------|----------|---------|--------|------|------|------|
| 1     | 6.702     | 1413262  | 86679   | 6.084  |      | M    |      |
| 2     | 7.374     | 21816995 | 1046517 | 93.916 |      | V M  |      |
| Total |           | 23230256 | 1133196 |        |      |      |      |

7d: IA, Hexane/iPrOH = 70/30, rate = 1.0 mL/min, 254 nm

<Chromatogram>

mV

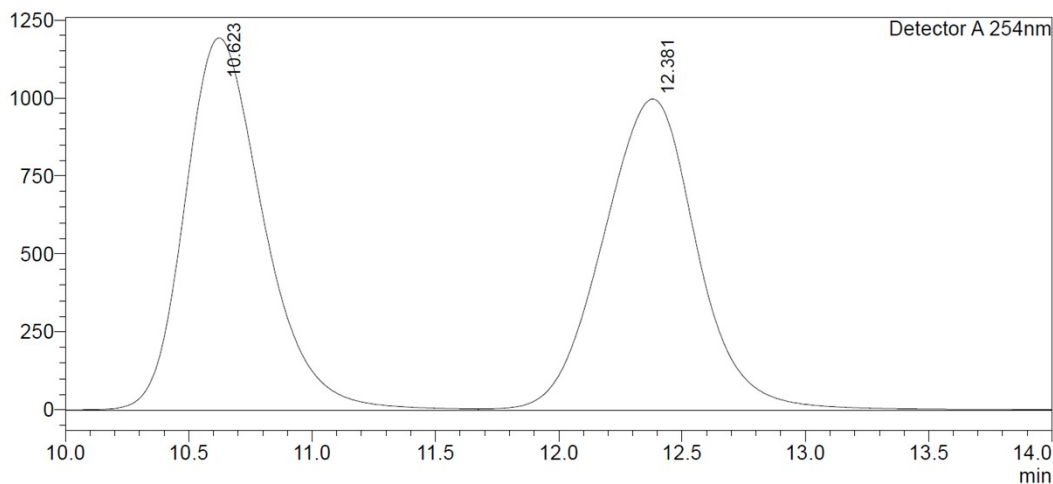

<Peak Table>

Detector A 254nm

| Peak# | Ret. Time | Area     | Height  | Conc.  | Unit | Mark | Name |
|-------|-----------|----------|---------|--------|------|------|------|
| 1     | 10.623    | 26585611 | 1193874 | 49.848 |      |      |      |
| 2     | 12.381    | 26747870 | 997797  | 50.152 |      | V    |      |
| Total |           | 53333481 | 2191672 |        |      |      |      |

<Chromatogram>

mV

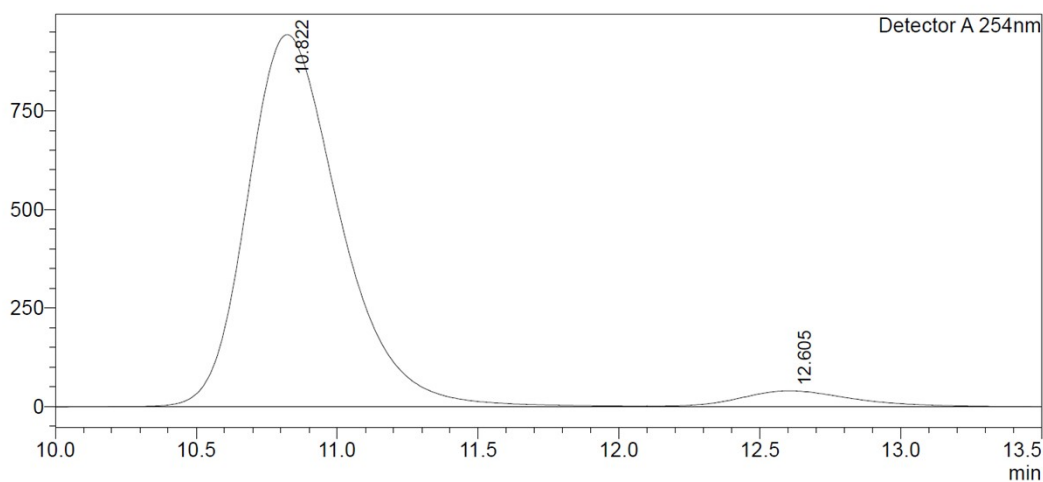

<Peak Table>

Detector A 254nm

| Peak# | Ret. Time | Area     | Height | Conc.  | Unit | Mark | Name |
|-------|-----------|----------|--------|--------|------|------|------|
| 1     | 10.822    | 21698355 | 944615 | 94.759 |      |      |      |
| 2     | 12.605    | 1200123  | 40876  | 5.241  |      | V    |      |
| Total |           | 22898478 | 985491 |        |      |      |      |
